# Supplementary material for: Bradyrhizobium diazoefficiens cultures display phenotypic heterogeneity
Source: ISME Commun. 2024 Mar 28;5(1):ycaf054. doi: 10.1093/ismeco/ycaf054 (PMC11996625; doi:10.1093/ismeco/ycaf054)
Supplement: Table_S1_ycaf054 [file table_s1_ycaf054.xlsx]

## Sheet: Raw data
Search Name:	E20240130_02_VB_1E1/results1
Search Name:	E20240130_04_VB_1E2/results1
Search Name:	E20240130_06_VB_1E3/results1
Search Name:	E20240130_08_VB_1E4/results1
Search Name:	E20240130_10_VB_2E1/results1
Search Name:	E20240130_12_VB_2E2/results1
Search Name:	E20240130_14_VB_2E3/results1
Search Name:	E20240130_16_VB_2E4/results1
Search Name:	E20240130_18_VB_3E1/results1
Search Name:	E20240130_20_VB_3E2/results1
Search Name:	E20240130_22_VB_3E3/results1
Search Name:	E20240130_24_VB_3E4/results1
			E20240130_02_VB_1E1/results1					E20240130_04_VB_1E2/results1					E20240130_06_VB_1E3/results1					E20240130_08_VB_1E4/results1					E20240130_10_VB_2E1/results1					E20240130_12_VB_2E2/results1					E20240130_14_VB_2E3/results1					E20240130_16_VB_2E4/results1					E20240130_18_VB_3E1/results1					E20240130_20_VB_3E2/results1
Rank	Uniq Pep	Acc #	Num Unique	Peptide Count	% Cov	Best Disc Score	Best Expect Val	Num Unique	Peptide Count	% Cov	Best Disc Score	Best Expect Val	Num Unique	Peptide Count	% Cov	Best Disc Score	Best Expect Val	Num Unique	Peptide Count	% Cov	Best Disc Score	Best Expect Val	Num Unique	Peptide Count	% Cov	Best Disc Score	Best Expect Val	Num Unique	Peptide Count	% Cov	Best Disc Score	Best Expect Val	Num Unique	Peptide Count	% Cov	Best Disc Score	Best Expect Val	Num Unique	Peptide Count	% Cov	Best Disc Score	Best Expect Val	Num Unique	Peptide Count	% Cov	Best Disc Score	Best Expect Val	Num Unique	Peptide Count
[1]		WP_011088158.1	129	243	70	13.6	1.4e-24	139	273	70.7	12.98	1.9e-23	138	282	68.8	14.51	2.9e-26	141	264	65.3	12.11	8.2e-22	135	229	62.7	12	1.3e-21	141	287	63.1	13.99	2.7e-25	135	279	63.7	12.6	1e-22	141	299	66.1	12.87	3.2e-23	128	279	69.2	12.97	2.1e-23	135	273
[2]		WP_011088159.1	137	236	73.8	12.59	1.1e-22	128	238	68.4	11.36	2e-20	138	240	73.1	13.03	1.6e-23	137	233	66.4	11.02	8.4e-20	129	203	65.2	12.38	2.6e-22	138	231	72.7	13.19	8.1e-24	132	256	69.2	11.38	1.8e-20	128	251	75.9	11.64	6.1e-21	127	229	75.7	13.89	4e-25	135	244
[3]		WP_011088372.1	87	641	83	11.79	3.2e-21	83	523	80.8	12.72	6e-23	85	576	81	11.61	6.9e-21	79	451	81.1	11.62	6.4e-21	73	348	80.4	10.42	1.1e-18	86	508	81.3	13.64	1.2e-24	81	530	81.7	11.65	5.8e-21	85	579	81.5	12.35	2.9e-22	85	591	82.6	12.62	9.1e-23	85	529
[3-1]	66	WP_011090265.1	68	274	78.8	11.91	1.9e-21	55	220	68	12.07	9.6e-22	62	228	81	12.89	3e-23	56	186	73.8	14.03	2.2e-25	55	137	69.8	10.24	2.3e-18	63	215	71.1	12.12	7.7e-22	56	218	73.8	11.61	6.7e-21	65	250	81.4	11.33	2.2e-20	59	250	76.4	13.41	3.2e-24	60	201
[3-2]	7	WP_011084855.1	52	305	55.7	10.95	1.1e-19	50	276	52.4	12.72	6e-23	50	267	54.6	11.03	8e-20	48	245	50	11.62	6.4e-21	46	191	50.2	10.25	2.2e-18	50	260	50.2	13.64	1.2e-24	48	253	51.5	11.35	2.1e-20	53	285	54.4	11.62	6.4e-21	49	272	51.5	10.23	2.5e-18	50	241
[3-3]	13	WP_011089717.1	46	343	58.5	11.76	3.5e-21	44	305	48.5	12.07	9.6e-22	43	310	50.2	11.61	6.9e-21	44	273	56	10.88	1.5e-19	45	222	50.2	10.24	2.3e-18	47	270	56.2	10.59	5.3e-19	41	281	48.5	11.61	6.7e-21	48	311	58.7	11.22	3.6e-20	47	320	57.3	11.42	1.5e-20	45	278
[3-4]	23	WP_011087983.1	36	187	48	11.76	3.5e-21	38	181	49.4	12.07	9.6e-22	37	173	49.1	11.61	6.9e-21	34	159	42.6	10.88	1.5e-19	32	120	39.3	10.24	2.3e-18	35	155	40.9	10.59	5.3e-19	31	147	40.9	11.61	6.7e-21	34	176	42.6	11.22	3.6e-20	29	180	35.9	11.42	1.5e-20	30	147
[4]		WP_011088153.1	66	152	77.8	15.26	1.2e-27	77	146	82.8	11.6	7.2e-21	72	148	82.8	13.23	6.7e-24	69	141	81	12.09	8.9e-22	66	120	73.9	10.29	1.9e-18	78	159	82	12.44	2e-22	73	171	82.5	14.69	1.3e-26	83	185	87	13.79	6.1e-25	70	178	85.7	11.99	1.3e-21	79	157
[5]		WP_011087047.1	76	115	58.7	14.54	2.5e-26	64	84	47.2	13.05	1.5e-23	69	101	50.6	12.08	9.1e-22	59	81	47.4	12.42	2.1e-22	76	120	49.3	13.02	1.7e-23	84	152	62.2	14.19	1.2e-25	89	158	58.6	14.48	3.3e-26	87	155	62.3	12.97	2e-23	73	108	53	14.14	1.4e-25	67	102
[6]		WP_063921419.1	82	142	59.6	9.99	6.9e-18	78	140	51.7	9.82	1.4e-17	91	162	55.8	9.96	7.6e-18	85	142	54.2	10.36	1.4e-18	80	112	55.7	10.51	7.3e-19	93	155	59.9	10.68	3.6e-19	87	153	65.2	10.77	2.4e-19	90	155	60.2	10.22	2.6e-18	93	171	62.3	9.87	1.1e-17	88	149
[7]		WP_011083284.1	80	108	65.4	10.34	1.5e-18	73	107	57.3	11.04	7.6e-20	86	120	71.4	11.79	3.2e-21	77	108	61.3	11.52	9.9e-21	80	103	55.6	10.75	2.6e-19	84	126	63.2	11.67	5.3e-21	81	122	65.3	13.2	7.9e-24	85	132	70.6	11.26	3.1e-20	73	108	65	14.75	1.1e-26	75	104
[8]		WP_011084221.1	87	134	70.5	10.45	9.6e-19	84	124	72.8	10.7	3.3e-19	84	143	74.5	10.55	6.3e-19	83	123	75.3	10.27	2e-18	79	102	71.8	10.77	2.4e-19	83	117	73.8	10.31	1.8e-18	79	117	70.6	9.67	2.6e-17	87	132	75.8	11.44	1.4e-20	87	139	70.4	11.07	6.9e-20	88	132
[8-1]	75	WP_011087911.1	46	63	51.9	9.32	1.2e-16	49	66	45.8	8.94	6e-16	49	66	48.3	9.58	3.9e-17	50	70	51	8.83	9.7e-16	53	68	54.1	9.76	1.8e-17	58	82	57.9	9.61	3.5e-17	55	76	50	10.93	1.3e-19	58	78	57.9	9.4	8.3e-17	46	64	49	10.73	2.9e-19	49	64
[9]		WP_011090468.1	76	107	51	10.13	3.8e-18	78	111	46.4	12.75	5.2e-23	79	121	44.6	12.47	1.8e-22	84	111	49	11.34	2.2e-20	77	101	46.2	10.21	2.7e-18	81	111	50.2	11.89	2.1e-21	83	123	48.3	13.8	6.1e-25	90	130	53.3	13.23	6.7e-24	76	106	47.8	11.54	9.2e-21	76	106
[10]		WP_011088628.1	84	101	56.9	9.54	4.7e-17	70	82	47.6	9.41	8e-17	74	84	49.3	9.3	1.3e-16	73	79	46.5	8.71	1.6e-15	72	78	47.1	7.47	3.2e-13	76	86	49.6	8.62	2.4e-15	87	96	53.7	9.14	2.6e-16	89	103	57.8	9.81	1.5e-17	76	87	50	9.41	8e-17	71	83
[11]		WP_011090112.1	66	84	52	9.21	1.9e-16	70	92	51.7	9.84	1.3e-17	71	87	46.3	9.94	8.6e-18	69	79	42.4	9.87	1.1e-17	67	82	45.4	10.24	2.4e-18	86	105	56.8	9.75	1.9e-17	70	91	51.6	10.03	5.8e-18	75	97	49.9	9.96	7.6e-18	65	83	44.9	10.67	3.7e-19	69	84
[12]		WP_011083601.1	67	124	73.8	10.94	1.2e-19	63	130	66	15.95	6.4e-29	64	143	68.3	15.37	7.6e-28	66	128	68.2	12.14	7.1e-22	66	114	65.1	15.64	2.4e-28	66	128	66.5	11.58	7.7e-21	66	145	71.2	16.57	4.5e-30	69	152	70.3	15.48	4.6e-28	64	135	64	14.99	3.7e-27	70	139
[13]		WP_011083297.1	62	98	60.7	10.92	1.3e-19	59	104	56.5	12.19	5.8e-22	69	123	62.9	11.96	1.6e-21	61	97	56.1	10.32	1.7e-18	57	95	51.3	11.61	6.7e-21	68	114	64.3	11.16	4.7e-20	63	111	58.7	12.6	1e-22	69	119	56.7	12.36	2.8e-22	64	116	54.7	12.1	8.5e-22	63	110
[14]		WP_011087707.1	64	98	62.9	9.93	9e-18	61	89	63.7	9.83	1.3e-17	66	101	62.9	9.41	8.2e-17	62	87	64.7	9.17	2.2e-16	71	100	63.8	9.79	1.6e-17	77	117	70.3	9.69	2.4e-17	67	103	65.4	9.53	4.9e-17	68	114	69.1	11.25	3.2e-20	61	92	63.7	12.79	4.4e-23	66	97
[15]		WP_011084290.1	59	83	63.9	13.1	1.2e-23	55	71	61.4	13.07	1.4e-23	61	82	61	13.01	1.7e-23	57	72	59.9	12.58	1.1e-22	58	76	59.4	13.26	5.9e-24	60	82	62.1	12.81	4.1e-23	63	86	63.7	12.87	3.1e-23	63	89	65.2	12.99	1.9e-23	54	71	61.2	12.37	2.7e-22	57	80
[16]		WP_038967390.1	52	87	60.5	13.88	4.2e-25	46	71	57.2	13.04	1.5e-23	58	99	65.2	13.03	1.6e-23	53	75	58.6	13.25	6.4e-24	45	71	52.2	9.91	9.5e-18	61	99	63.6	11.81	2.9e-21	54	101	59.7	12.33	3.2e-22	66	117	69	11.15	4.9e-20	42	66	53.8	14.25	8.8e-26	51	76
[17]		WP_011083605.1	56	85	52.4	17.45	1e-31	56	79	50.9	11.72	4.3e-21	59	90	51.9	18.87	2.4e-34	57	85	52.8	19.74	6e-36	60	78	56	18.21	4.2e-33	64	95	55.7	17.76	2.8e-32	54	86	48.7	19.98	2.2e-36	60	100	52.1	20.31	5.3e-37	55	92	52	20.14	1.1e-36	57	90
[18]		WP_011089775.1	54	74	52.9	10.23	2.5e-18	47	70	50.9	9.88	1.1e-17	45	63	49.3	10.39	1.3e-18	53	74	50.9	10.22	2.5e-18	54	73	47.8	10.07	4.9e-18	65	100	56.2	10.18	3.1e-18	60	91	56.4	9.86	1.2e-17	68	104	59.4	10.55	6.3e-19	49	66	52.2	10.57	5.7e-19	50	74
[19]		WP_011090213.1	59	72	56.2	9.46	6.6e-17	54	68	54.6	10.47	8.8e-19	58	78	55.2	11.09	6.3e-20	58	68	54	11.07	7e-20	63	73	57.6	11.03	8e-20	75	93	66.1	9.41	7.9e-17	61	81	59.1	10	6.6e-18	62	81	57.2	10.43	1e-18	59	76	52.9	11.39	1.7e-20	63	80
[20]		WP_011088152.1	50	352	85.4	11.31	2.5e-20	49	311	87.9	11.43	1.4e-20	55	352	86.1	11.41	1.6e-20	52	320	91.7	10.41	1.1e-18	48	270	86.1	11.56	8.5e-21	54	359	88.9	12.02	1.2e-21	55	355	85.4	12.76	5.1e-23	59	360	85.4	11.93	1.7e-21	50	324	85.4	11.89	2.1e-21	53	327
[21]		WP_011083168.1	53	130	61.8	10.95	1.1e-19	49	135	62.2	10.91	1.3e-19	60	164	63.3	12.38	2.5e-22	53	115	63.6	11.99	1.3e-21	30	35	38.2	9.13	2.7e-16	33	43	44.4	12.09	8.8e-22	33	45	47.6	12.8	4.2e-23	32	44	44.5	12.9	2.7e-23	52	149	55.1	13.64	1.2e-24	56	127
[22]		WP_038967449.1	56	130	75.1	14.72	1.2e-26	52	119	77.4	14.56	2.4e-26	54	149	76.2	11.96	1.5e-21	51	122	77.1	11.45	1.4e-20	21	23	38.5	10.03	5.7e-18	21	24	32.7	11.02	8.5e-20	17	18	31.9	9.62	3.3e-17	15	16	28	9.58	4e-17	54	154	81.8	14.64	1.6e-26	52	133
[23]		WP_011087621.1	65	129	58.8	12.26	4.3e-22	59	125	55.3	11.56	8.5e-21	60	143	55.8	11.31	2.5e-20	68	142	64	10.34	1.6e-18	57	89	46.2	9.84	1.3e-17	67	138	60.4	10.57	5.8e-19	63	145	55.9	11.2	4e-20	64	154	59.5	11.36	2e-20	54	132	48.7	12.38	2.6e-22	65	125
[23-1]	2	WP_038966217.1	9	16	7.4	10.29	1.9e-18	8	15	5.7	8.07	2.4e-14	7	16	5.4	9	4.7e-16	10	22	8.1	9.54	4.7e-17	7	11	5.1	9.84	1.3e-17	9	23	7.4	9.63	3.1e-17	9	22	7.4	8.68	1.9e-15	8	21	5.4	8.73	1.5e-15	8	20	5.7	8.54	3.3e-15	9	20
[24]		WP_038967189.1	64	125	53.8	10.52	7.1e-19	61	136	47.7	9.93	8.8e-18	64	132	51.6	10.28	2e-18	66	122	54.7	9.86	1.2e-17	60	102	53.6	10.39	1.2e-18	65	125	62.6	10.1	4.3e-18	57	130	51.8	11.68	5.1e-21	64	130	54.3	9.6	3.6e-17	61	132	54	10.24	2.3e-18	63	142
[25]		WP_011083345.1	46	62	67.4	14.73	1.2e-26	46	68	66.4	15.15	1.9e-27	44	69	63.3	14.23	9.5e-26	51	72	69.6	14.23	9.5e-26	48	67	65.3	14.42	4.2e-26	54	74	69.6	14.31	7e-26	59	92	73.3	15.02	3.3e-27	59	89	67.9	15.76	1.4e-28	48	77	67.9	13.38	3.5e-24	47	72
[26]		WP_038967195.1	63	88	56.6	11.12	5.6e-20	67	94	58.3	12.43	2.1e-22	63	91	54	10.05	5.3e-18	62	84	54.3	9.3	1.3e-16	59	77	57.8	8.09	2.3e-14	65	95	59.9	10.18	3e-18	67	96	56.8	10.36	1.4e-18	68	106	59.8	10.16	3.3e-18	67	91	59	11.06	7.2e-20	67	86
[27]		WP_011083272.1	53	158	96.9	11.67	5.2e-21	44	100	94.5	11.19	4e-20	45	127	95	11.25	3.2e-20	43	95	83.2	11.21	3.7e-20	40	75	80.7	10.98	1e-19	46	113	95.8	11.03	8.1e-20	45	125	93.3	12.66	7.8e-23	53	119	95	11.17	4.4e-20	46	137	95	10.66	4e-19	41	102
[28]		WP_011085283.1	65	81	48.3	10.8	2.2e-19	58	74	46.9	10.53	6.8e-19	63	81	46.8	10.45	9.5e-19	60	75	44.1	10.17	3.1e-18	51	63	43	9.31	1.3e-16	56	69	40.9	9.79	1.6e-17	52	64	39.5	9.46	6.6e-17	58	69	41.3	9.8	1.5e-17	58	78	43.8	10.42	1.1e-18	61	75
[29]		WP_011089497.1	51	74	54.7	11.23	3.4e-20	52	71	46.6	9.4	8.3e-17	49	70	47	11.13	5.3e-20	53	74	53.7	10.48	8.4e-19	48	60	49.5	9.53	4.8e-17	57	77	52.6	9.37	9.7e-17	54	73	55.2	10.77	2.5e-19	59	79	56.3	10.54	6.5e-19	53	74	56.6	10.07	4.8e-18	50	69
[30]		WP_011083979.1	65	81	61.7	10.67	3.8e-19	63	86	60.2	10.87	1.6e-19	58	78	53.5	10.45	9.6e-19	66	82	61.7	9.29	1.4e-16	58	68	49.5	9.63	3.1e-17	63	80	54.4	9.9	1e-17	64	85	57.3	9.69	2.4e-17	66	85	57.9	9.2	2e-16	62	83	57.5	9.36	1e-16	61	77
[30-1]	70	WP_011090545.1	44	60	58.2	9.25	1.6e-16	40	58	53.4	9.87	1.1e-17	55	72	67.9	10.64	4.3e-19	43	55	53.6	8.88	7.7e-16	41	52	54.4	8.99	4.9e-16	45	58	57	9.88	1.1e-17	38	52	54.4	8.93	6.2e-16	44	55	59.7	9.04	3.9e-16	46	62	58.2	8.96	5.4e-16	43	56
[31]		WP_011083506.1	45	118	61.9	15.46	5.2e-28	55	149	65.4	16	5.1e-29	49	152	61.8	13.58	1.5e-24	50	133	59.9	12.26	4.3e-22	40	76	52.4	9.32	1.2e-16	52	143	63.7	12.69	6.8e-23	51	144	58.9	15.99	5.3e-29	51	141	63.3	15.38	7e-28	52	171	62.4	15.87	8.7e-29	56	160
[32]		WP_011088685.1	49	121	83.9	12.2	5.5e-22	49	116	83.1	11.78	3.3e-21	54	129	79.5	11.22	3.6e-20	52	114	71.5	11.19	4.1e-20	47	101	76.1	10.13	3.8e-18	59	135	71.9	10.8	2.1e-19	57	158	78	11.25	3.2e-20	53	138	67.4	11.02	8.5e-20	53	123	71.9	9.1	3e-16	53	125
[33]		WP_011085992.1	44	143	68.6	11.83	2.7e-21	42	94	61.3	9.85	1.2e-17	49	126	77.9	12.33	3.2e-22	42	92	76.5	10.44	1e-18	36	50	60.8	11.41	1.6e-20	39	72	62.2	11.52	1e-20	38	75	67.2	10.18	3e-18	45	90	76.2	12.32	3.2e-22	46	151	76.5	11.63	6.4e-21	41	107
[34]		WP_038965161.1	51	79	58.5	12.82	4e-23	45	72	57.7	12.66	7.9e-23	44	69	64.9	12.78	4.7e-23	50	76	64.5	13.29	5.2e-24	46	61	58.4	10.05	5.3e-18	51	81	62.6	10.59	5.2e-19	51	79	63	13.86	4.6e-25	46	70	56.4	10.54	6.6e-19	50	84	64.9	12.33	3.1e-22	53	80
[35]		WP_028174796.1	51	70	74.4	13.08	1.3e-23	37	47	71.4	12.24	4.6e-22	33	43	69.5	11.3	2.6e-20	40	50	67	12.95	2.2e-23	32	38	61.8	14.46	3.6e-26	34	43	68.3	15.1	2.4e-27	35	47	61.6	15.89	8e-29	43	60	80.7	17.69	3.8e-32	37	56	68.1	15.02	3.3e-27	36	49
[36]		WP_011086918.1	43	67	52.1	11.67	5.3e-21	44	71	49.9	13.11	1.1e-23	52	79	53.4	12.25	4.5e-22	44	63	52.7	14.54	2.5e-26	44	60	49.8	13.18	8.3e-24	50	73	59.9	11.62	6.6e-21	48	71	59	12.82	4e-23	52	79	59	13.96	3e-25	46	69	56.3	13.58	1.5e-24	44	66
[37]		WP_011086749.1	57	96	90.1	11.42	1.5e-20	48	85	71.8	8.95	5.8e-16	51	89	85.5	8.5	3.9e-15	45	72	66.2	8.61	2.5e-15	44	69	63.6	9.7	2.4e-17	54	87	76.1	10.56	6.1e-19	49	80	76.3	10.29	1.9e-18	53	86	77.9	10.45	9.5e-19	47	79	66.6	8.42	5.6e-15	50	75
[38]		WP_028174953.1	42	78	64.7	10.4	1.2e-18	44	88	62.8	10.79	2.2e-19	44	85	62.3	11.22	3.6e-20	50	85	65.9	10.6	5.1e-19	41	61	60.3	9.49	5.7e-17	53	80	67.3	11.15	4.8e-20	45	82	57.4	10.11	4.1e-18	47	84	61.3	10.62	4.6e-19	48	86	64.2	9.72	2.2e-17	52	94
[39]		WP_028172917.1	54	76	59.3	9.47	6.2e-17	54	74	57.1	10.33	1.6e-18	55	74	59.4	9.93	8.8e-18	52	63	58.9	10.03	5.8e-18	53	70	60.5	10.45	9.6e-19	59	79	62.2	10.37	1.3e-18	61	84	65.6	10.26	2.2e-18	63	84	66.2	10.25	2.2e-18	53	70	55.4	9.97	7.5e-18	56	75
[39-1]	1	decoy	1	1	1.8	0.77	0.0021	1	1	1.8	1.02	0.00067											1	1	2.8	-0.87	0.0033						1	1	1.8	1.17	0.002	2	2	2.8	0.77	0.00075	1	1	1.8	1.07	0.001	1	1
[40]		WP_038966363.1	59	76	58.3	9.61	3.5e-17	56	79	53.7	9.39	8.7e-17	56	73	50.5	11.41	1.6e-20	51	68	44.1	9.16	2.3e-16	40	47	41.1	8.51	3.7e-15	60	79	51.4	9.43	7.4e-17	58	77	53.1	9.01	4.4e-16	56	73	51.5	9.98	7.1e-18	53	71	50.3	10.46	9.4e-19	52	68
[41]		WP_011087247.1	51	63	52.4	10.47	8.6e-19	49	61	46.5	9.75	1.9e-17	55	71	51.8	10.33	1.6e-18	57	67	49.5	10.76	2.5e-19	48	56	44.3	10.04	5.4e-18	60	74	54.6	10.93	1.2e-19	57	77	56.9	10.63	4.5e-19	59	80	52	10.82	2e-19	50	63	50.5	10.52	7.1e-19	47	56
[42]		WP_011083036.1	49	64	52	10.89	1.4e-19	47	59	43.1	7.02	2.1e-12	49	63	48.1	9.58	3.9e-17	52	67	49.4	10.62	4.7e-19	57	69	50.2	9.18	2.1e-16	61	77	58	12.85	3.5e-23	56	73	59.6	9.99	6.8e-18	54	70	52.7	10.53	6.9e-19	50	65	49.9	9.71	2.2e-17	59	74
[43]		WP_011087210.1	51	62	33.2	8.78	1.2e-15	57	66	34.8	9.57	4.2e-17	49	55	33.8	9.06	3.6e-16	53	61	33.3	8.99	4.8e-16	42	49	26.2	7.69	1.2e-13	56	63	37.8	8.59	2.6e-15	54	57	32.5	8.72	1.6e-15	42	52	29.8	9.3	1.3e-16	53	67	34.5	8.47	4.5e-15	63	77
[44]		WP_011084107.1	44	77	57	10.89	1.5e-19	45	87	63.9	10.48	8.3e-19	42	79	46.8	10.33	1.6e-18	42	62	54.7	10.59	5.2e-19	44	60	62.2	9.58	3.9e-17	47	75	69.4	10.87	1.6e-19	45	80	63.9	10.57	5.7e-19	52	85	62.6	11.28	2.8e-20	40	70	50.4	10.7	3.3e-19	48	79
[45]		WP_011083371.1	51	79	69.2	8.86	8.6e-16	44	71	53	9.81	1.4e-17	45	79	65.6	11.05	7.4e-20	44	63	53.5	9.55	4.4e-17	52	75	64.3	10.11	4.1e-18	54	88	67.3	10.96	1.1e-19	55	92	69.7	11.03	8e-20	53	91	64.1	10.8	2.2e-19	45	86	57.2	8.83	9.6e-16	51	78
[46]		WP_011088915.1	48	64	49.4	13.78	6.4e-25	46	61	49.2	12.8	4.2e-23	48	62	52.4	14.13	1.4e-25	49	59	51.4	11.89	2e-21	50	63	49.4	12.51	1.5e-22	54	66	54.3	13.2	7.7e-24	52	66	58.2	11.74	3.9e-21	51	69	54.5	9.12	2.7e-16	54	74	58.2	12.82	3.9e-23	50	62
[47]		WP_011087818.1	49	64	55.3	10.18	3e-18	49	64	55.8	10.06	5.1e-18	42	61	54.2	11.78	3.4e-21	46	58	56.1	9.71	2.2e-17	49	59	55.4	10.91	1.3e-19	57	77	56.5	10.29	1.9e-18	55	75	64	10.02	6.1e-18	56	78	57.1	10.86	1.7e-19	47	62	56.1	12.4	2.3e-22	45	59
[47-1]	64	WP_011087464.1	42	53	41.8	10.23	2.4e-18	40	49	38.1	8.08	2.3e-14	41	56	45	11.28	2.8e-20	41	51	38	7.47	3.1e-13	38	47	37.2	7.69	1.2e-13	48	66	45.9	10.27	2.1e-18	42	57	38.7	10.95	1.1e-19	48	62	51.9	11.42	1.5e-20	41	59	40.8	10.78	2.3e-19	44	54
[48]		WP_011083454.1	54	68	61.3	9.21	1.9e-16	53	67	57.8	9.58	4e-17	52	67	56.2	9.36	9.9e-17	52	64	56.2	10.15	3.4e-18	55	59	58.4	9.98	7.2e-18	59	76	64.3	8.9	7.2e-16	51	61	54.3	9.59	3.8e-17	52	64	57	9.85	1.2e-17	56	66	55.8	9.71	2.2e-17	56	68
[49]		WP_011087552.1	46	137	63.6	10.39	1.2e-18	40	131	58.2	11.68	5.1e-21	50	158	68.1	10.92	1.3e-19	44	128	57.2	11.17	4.5e-20	37	54	59.6	9.35	1.1e-16	41	76	67.1	10.57	5.8e-19	40	84	63.6	10.49	8e-19	39	89	62.6	11.5	1.1e-20	41	180	59.6	11.68	5.1e-21	45	165
[50]		WP_011087712.1	44	104	67.6	11.53	9.6e-21	38	90	64.8	10.17	3.2e-18	41	92	65.5	11.8	3e-21	40	80	52.9	10.93	1.2e-19	34	54	52.9	9.33	1.1e-16	45	95	62.3	11.15	4.8e-20	43	99	69.9	12.11	8e-22	45	94	57.8	10.21	2.7e-18	38	97	56.9	10.78	2.4e-19	42	81
[51]		WP_011083274.1	51	152	71.1	11.58	7.6e-21	47	132	66.6	11.59	7.3e-21	53	161	63.1	11.88	2.2e-21	51	131	64.8	11.49	1.1e-20	45	97	61.3	9.82	1.4e-17	52	142	66.8	11.73	4.1e-21	52	164	67.6	10.92	1.3e-19	52	150	67.6	11.46	1.3e-20	49	157	66.4	12.06	1e-21	46	136
[52]		WP_269465755.1	44	62	41.5	12.04	1.1e-21	44	65	45.1	11.06	7.1e-20	47	69	46.5	12.42	2.2e-22	44	62	36.2	9.28	1.4e-16	39	53	40.4	8.93	6.3e-16	46	66	45.8	10.45	9.7e-19	45	66	38.5	11.47	1.2e-20	51	77	49.1	11.71	4.4e-21	42	62	54.2	12.79	4.5e-23	47	63
[53]		WP_011087628.1	43	126	91.5	13.47	2.4e-24	32	42	75.2	12.05	1.1e-21	41	79	88.9	15.02	3.3e-27	30	45	90.6	12.99	1.9e-23	32	46	84.7	14.08	1.8e-25	39	69	91.5	12.42	2.2e-22	38	82	90.6	13.67	1.1e-24	45	79	90.6	11.04	7.7e-20	37	72	87	13.99	2.7e-25	33	47
[54]		WP_011086692.1	45	66	64.4	11.93	1.7e-21	44	67	64	11.68	5.1e-21	44	63	65.4	12.01	1.2e-21	44	65	64	12.26	4.3e-22	35	45	58.3	10.15	3.5e-18	46	61	70.8	10.5	7.9e-19	44	62	69.1	12.59	1.1e-22	42	63	60.4	11.75	3.7e-21	40	65	56.8	10.6	5e-19	43	66
[55]		WP_011083645.1	43	59	58.8	10	6.5e-18	47	60	55.6	10.52	7.2e-19	43	56	54.9	11.44	1.4e-20	49	62	60	11.01	8.8e-20	48	57	56	9.56	4.2e-17	56	69	62.6	10.34	1.5e-18	50	65	60.2	11.28	2.8e-20	44	62	52.9	11.07	6.8e-20	42	56	53.3	11.17	4.4e-20	50	67
[55-1]	47	WP_011090481.1	36	43	51.1	10.31	1.8e-18	34	45	38.1	11.59	7.3e-21	33	42	47.9	9.65	2.8e-17	32	37	40.8	8.05	2.6e-14	31	37	43.9	8.9	7.3e-16	33	41	37.4	8.54	3.3e-15	35	46	42	9	4.7e-16	40	52	47.3	10.17	3.2e-18	36	45	44.3	12.46	1.8e-22	37	47
[56]		WP_011087607.1	38	65	62.7	11.44	1.4e-20	34	60	60.1	12.2	5.5e-22	36	61	58.5	11.42	1.5e-20	31	54	56.7	10.96	1.1e-19	32	46	62.9	11.13	5.3e-20	41	84	64.7	12.33	3.1e-22	39	74	67.5	13.35	4e-24	41	79	58.5	12.73	5.8e-23	31	59	50.7	11.38	1.8e-20	34	64
[57]		WP_027546860.1	47	76	67.4	10.24	2.3e-18	45	86	60.4	11.1	5.9e-20	46	83	66.7	11.1	6e-20	43	72	67.1	9.85	1.3e-17	37	59	55.5	9.64	3e-17	48	100	66	10.23	2.5e-18	43	95	58.1	10.55	6.1e-19	47	82	71.1	10.95	1.1e-19	47	74	61.8	11.18	4.3e-20	46	81
[58]		WP_011087677.1	44	69	59.2	11.11	5.9e-20	41	66	55	11.13	5.3e-20	45	80	60.8	11.41	1.6e-20	47	75	61.2	11.17	4.5e-20	41	59	54.8	11.39	1.8e-20	43	74	55.3	12	1.3e-21	41	75	57.2	12.91	2.7e-23	50	84	70.3	12.35	2.9e-22	41	75	54.4	10.35	1.5e-18	40	71
[59]		WP_038965775.1	36	58	72.7	14.47	3.4e-26	26	40	65	10.7	3.3e-19	37	57	70.3	9.96	7.8e-18	34	51	69.6	10.75	2.6e-19	31	40	69.1	11.03	8.1e-20	31	51	80	12.62	9e-23	36	63	62.3	14.08	1.8e-25	40	71	75.4	11.57	8.1e-21	32	42	72	11.43	1.4e-20	32	44
[60]		WP_011083147.1	37	46	56.3	11.42	1.5e-20	31	43	51.1	10.45	9.6e-19	35	47	52.9	10.55	6.2e-19	36	47	50.5	9.61	3.5e-17	36	49	48.6	10.44	9.9e-19	52	74	64.3	10.96	1.1e-19	46	68	63.2	10.57	5.7e-19	42	65	56	10.91	1.4e-19	37	53	55.1	10.04	5.6e-18	38	50
[61]		WP_011090848.1	42	58	67.7	10.34	1.6e-18	46	63	67.7	9.7	2.4e-17	39	53	65.5	9.93	8.7e-18	42	55	59.3	9.06	3.7e-16	41	56	57.9	9.38	9.2e-17	47	70	60.3	9.6	3.5e-17	42	58	64.7	10.13	3.8e-18	40	58	67.7	9.13	2.7e-16	43	63	66.9	10.36	1.4e-18	40	59
[62]		WP_011084982.1	34	38	41	8.09	2.2e-14	35	42	39.8	10.05	5.2e-18	45	53	48.5	8.61	2.5e-15	54	68	53.8	10.3	1.8e-18	32	33	33.2	7.12	1.4e-12	34	39	39.8	8.19	1.5e-14	35	42	38.7	8.81	1e-15	48	63	41.6	10.94	1.2e-19	36	44	42.1	9.73	2e-17	35	40
[62-1]	2	WP_011083225.1	33	37	39.5	8.09	2.2e-14	34	41	38.4	10.05	5.2e-18	44	52	47	8.61	2.5e-15	54	68	53.8	10.3	1.8e-18	30	31	31.4	6.48	2.2e-11	32	37	38	8.19	1.5e-14	34	41	37.2	8.81	1e-15	46	61	39.8	10.94	1.2e-19	35	43	40.7	9.73	2e-17	33	38
[62-2]	11	WP_011087013.1	11	13	67.3	8.13	1.9e-14	10	13	48.7	7.48	3e-13	10	11	50	6.21	6.9e-11	8	10	48.7	5.93	6.7e-11	6	7	43.3	3.86	1.6e-08	8	12	48.7	7.52	2.6e-13	7	9	38	6.32	4.2e-11	8	10	42	6.01	1.6e-10	6	9	35.3	7.7	1.2e-13	9	11
[63]		WP_011090513.1	41	51	57.3	10.74	2.8e-19	35	44	60.6	11.85	2.5e-21	39	48	53.1	10.83	1.9e-19	33	41	53.6	10.16	3.3e-18	36	43	50.7	10.5	7.6e-19	44	55	67.4	11.34	2.1e-20	40	51	62.1	11	9.1e-20	43	54	61.1	10.06	5e-18	33	42	49.9	10.79	2.3e-19	37	46
[64]		WP_038966922.1	42	58	71.2	13.28	5.6e-24	41	57	68.6	12.11	8.2e-22	44	62	74.1	9.05	3.8e-16	40	56	61.3	10.86	1.6e-19	34	46	54.3	12.14	7e-22	47	66	69.7	10.87	1.6e-19	42	57	68.6	9.16	2.3e-16	44	59	70.1	12.9	2.8e-23	41	56	64.8	10.01	6.3e-18	40	54
[65]		WP_011086731.1	40	61	77.3	10.75	2.7e-19	34	49	64.3	11.13	5.3e-20	37	54	73.7	11.72	4.3e-21	33	44	70.9	10.94	1.2e-19	33	44	60.4	9.6	3.6e-17	39	64	74.9	11.7	4.7e-21	42	67	78.5	11.44	1.4e-20	43	68	81.5	11.42	1.5e-20	28	42	57	10.84	1.8e-19	29	38
[66]		WP_011085402.1	36	69	68.3	14.93	4.8e-27	29	50	45.8	13.04	1.5e-23	35	69	59.2	16.49	6.3e-30	36	54	66.1	16.79	1.7e-30	38	54	66.1	16.24	1.8e-29	39	64	62.9	17.31	1.9e-31	36	57	60.9	15.53	3.7e-28	31	55	58.7	13.81	5.7e-25	34	63	64.1	14.52	2.8e-26	33	54
[67]		WP_011088023.1	39	60	50.7	9.57	4.1e-17	40	62	55.7	9.58	3.9e-17	39	60	57.7	8.71	1.6e-15	38	55	56.5	9.31	1.2e-16	45	59	68.9	8.77	1.3e-15	48	68	64.2	9.31	1.3e-16	42	69	64.8	10	6.5e-18	44	69	59	9.89	1e-17	43	73	59.2	9.63	3.1e-17	40	66
[68]		WP_011090851.1	44	66	76	9.29	1.3e-16	40	62	72.6	10.43	1.1e-18	44	65	77.4	10.59	5.3e-19	33	49	66.4	9.97	7.4e-18	38	48	75.3	9.07	3.5e-16	40	57	78.5	9.09	3.2e-16	37	54	72.4	11.25	3.2e-20	45	59	74.4	8.76	1.3e-15	41	64	74.2	10.72	3e-19	40	58
[68-1]	2	WP_011085170.1	40	62	76	11.7	4.6e-21	36	57	72.6	10.98	9.9e-20	43	64	77.4	12.13	7.6e-22	32	48	70.1	11.75	3.8e-21	35	45	69.6	9.07	3.5e-16	40	57	82.2	12.02	1.2e-21	35	52	70.3	11.25	3.2e-20	44	58	78.1	11.12	5.6e-20	37	60	68.5	10.09	4.5e-18	38	56
[69]		WP_011083281.1	46	59	72.1	9.28	1.4e-16	40	52	58.8	9.16	2.3e-16	43	58	61.8	11.1	5.9e-20	51	64	68.7	10.16	3.3e-18	44	56	65	9.85	1.2e-17	47	66	73.4	13.57	1.6e-24	45	62	68.2	10.09	4.4e-18	38	60	62.9	11.68	5e-21	39	52	60.7	9.67	2.6e-17	46	60
[70]		WP_011087470.1	46	53	47.2	9.69	2.5e-17	48	57	48	10.35	1.5e-18	50	58	50.8	10.42	1.1e-18	48	53	42.1	8.29	9.4e-15	50	59	47	8.83	9.8e-16	54	61	51.5	10.54	6.4e-19	50	62	51.6	9.49	5.8e-17	53	65	49.6	9.42	7.8e-17	46	54	48.2	9.08	3.2e-16	48	57
[71]		WP_011087372.1	40	42	37.7	10.27	2.1e-18	49	51	45.6	12.67	7.3e-23	42	46	40.4	8.81	1.1e-15	51	56	51.4	12.11	8e-22	47	47	44	8.64	2.2e-15	54	58	50	11.06	7.2e-20	53	58	48.4	11.57	7.9e-21	45	49	40.6	9.79	1.6e-17	39	42	38.1	11.01	8.9e-20	37	39
[72]		WP_011088655.1	46	66	50.7	11.36	1.9e-20	39	63	43.4	9.14	2.5e-16	44	67	52.1	8.82	9.9e-16	43	66	48	9.52	5e-17	41	50	45.8	9.64	3e-17	45	63	48.1	10.36	1.4e-18	44	64	51.2	9.61	3.5e-17	46	64	50.2	8.96	5.6e-16	40	61	47.5	9.93	8.7e-18	40	59
[73]		WP_028175239.1	38	111	82.9	11.92	1.8e-21	31	88	76.3	11.28	2.8e-20	35	103	73	11.52	1e-20	30	82	68.6	11.27	2.9e-20	29	59	65.8	10.3	1.8e-18	33	79	85.5	11.61	6.7e-21	31	89	77	11.79	3.2e-21	35	90	87	11.86	2.3e-21	39	132	82.4	11.71	4.4e-21	33	100
[74]		WP_011088491.1	39	85	80.2	11.25	3.1e-20	32	65	70.5	11.59	7.4e-21	43	87	81.9	12.9	2.8e-23	34	61	62.6	11.05	7.5e-20	29	51	66.3	10.88	1.5e-19	39	69	81.2	12.94	2.4e-23	37	84	76	11.33	2.2e-20	39	79	76.7	12.28	3.8e-22	37	77	79	11.42	1.6e-20	35	68
[75]		WP_011083462.1	45	70	68.4	11.91	1.9e-21	43	70	79.1	10.84	1.8e-19	45	69	77.7	11.78	3.2e-21	43	72	84.1	12.53	1.3e-22	35	49	66	10.32	1.7e-18	41	64	70.1	9.97	7.3e-18	43	74	66.3	12.44	1.9e-22	43	71	71.5	10.73	2.9e-19	39	70	67.7	10.08	4.7e-18	41	65
[76]		WP_236842094.1	41	51	63.1	9.81	1.5e-17	40	51	66	12.53	1.3e-22	34	46	54.5	11.44	1.4e-20	40	47	64.8	13.12	1.1e-23	39	45	63.4	8.45	4.8e-15	44	57	69.5	14.91	5.3e-27	42	54	67.6	13.29	5.3e-24	43	52	64.8	8.83	9.8e-16	34	44	60.3	14.46	3.6e-26	38	46
[77]		WP_011085794.1	42	51	70	8.43	5.3e-15	38	47	57	8.52	3.6e-15	41	53	57.7	9.3	1.3e-16	36	40	61.6	8.37	6.8e-15	39	43	56.8	9.65	2.9e-17	44	51	72.6	8.72	1.5e-15	38	47	58.5	9.45	6.7e-17	46	56	60.5	9.76	1.8e-17	39	45	55.5	8.02	3e-14	36	42
[78]		WP_011088464.1	42	52	56.9	14.43	4e-26	35	47	53.3	10.59	5.3e-19	40	52	59.1	12.39	2.4e-22	38	47	59.1	13.62	1.3e-24	38	43	49.5	9.91	9.4e-18	38	49	48.4	10.17	3.1e-18	39	52	56.7	9.73	2e-17	42	55	62.1	10.39	1.2e-18	38	48	49.2	13.12	1.1e-23	43	55
[79]		WP_028175335.1	32	45	46.4	11.03	8.2e-20	30	43	44.4	10.71	3.1e-19	36	51	48.8	11.36	2e-20	40	51	44.9	11.07	6.7e-20	24	30	35.7	10.38	1.3e-18	37	49	44.7	12.25	4.4e-22	34	48	50.3	10.68	3.6e-19	35	48	44.7	9.8	1.5e-17	34	48	43.9	10.76	2.6e-19	37	48
[80]		WP_038967253.1	42	58	69	8.52	3.6e-15	45	57	64.3	9.67	2.7e-17	46	59	74	9.36	9.9e-17	45	55	61.7	9.02	4.3e-16	43	51	62.2	8.83	9.5e-16	50	62	70	10.81	2.1e-19	49	61	73.5	10.36	1.4e-18	48	66	72	9.03	4.2e-16	43	59	63.3	10.28	2e-18	46	59
[81]		WP_011083531.1	44	65	50.1	10.7	3.2e-19	40	57	46.5	10.64	4.3e-19	45	63	48.9	12.56	1.2e-22	40	55	46	10.34	1.5e-18	46	60	50.5	10.64	4.3e-19	46	66	55.1	10.69	3.4e-19	47	64	52.9	11.08	6.4e-20	48	64	53.1	10.48	8.5e-19	43	65	49.6	9.79	1.6e-17	44	61
[82]		WP_011082991.1	43	57	43.1	10.35	1.5e-18	44	61	39.6	10.82	2e-19	43	57	42.8	10.59	5.3e-19	44	56	37.6	11.1	5.9e-20	44	50	37.4	10.16	3.3e-18	49	62	43.2	12.87	3.2e-23	47	59	42.3	10.56	6.1e-19	47	65	39.9	11.59	7.3e-21	38	49	35.7	10.23	2.5e-18	42	50
[83]		WP_011088540.1	42	60	66.8	11.19	4.2e-20	37	55	57.2	11	9.2e-20	43	62	63.5	10.85	1.7e-19	40	56	60.3	10.06	5e-18	39	49	55.7	10.1	4.3e-18	35	47	61	10.97	1e-19	41	60	62.1	10.86	1.7e-19	41	60	63.2	9.87	1.1e-17	39	58	58.6	10.56	6e-19	39	53
[84]		WP_011090863.1	34	76	57.4	10.61	4.9e-19	35	73	59.9	12.3	3.6e-22	34	78	57.4	11.77	3.5e-21	35	63	54.8	11.53	9.5e-21	31	55	56.5	10.52	7e-19	36	67	58.4	12.19	5.9e-22	33	70	51.7	10.7	3.4e-19	34	65	53.3	11.35	2.1e-20	33	76	51.3	11.07	7e-20	34	68
[85]		WP_011087702.1	50	62	45.2	9.38	9e-17	43	53	40.9	9.11	2.9e-16	46	58	46.1	8.93	6.4e-16	42	48	35.7	9.07	3.4e-16	36	43	37	9.03	4e-16	47	55	42.6	8.8	1.1e-15	43	49	42.2	9.08	3.4e-16	47	58	40.8	9.42	7.7e-17	43	52	40.1	9.41	8.2e-17	45	52
[86]		WP_011088094.1	40	44	35.3	9.48	5.9e-17	38	42	30	7.87	5.9e-14	37	42	29.1	9.29	1.4e-16	43	45	33.5	10.21	2.7e-18	34	37	30.6	8.62	2.4e-15	48	52	38.8	8.82	1e-15	40	44	33.8	8.48	4.3e-15	41	44	35.1	9.44	7.2e-17	40	46	35.1	8.56	3.1e-15	40	45
[86-1]	21	WP_011090318.1	13	14	15	4.01	3.5e-09	13	13	14.4	4.77	3.7e-09	12	12	13.8	6.08	1.5e-11	12	12	13.8	5.35	6.1e-11	2	2	1.8	1.94	1.7e-06	2	2	1.8	2.36	6.7e-07	3	3	3.2	2.56	1.9e-07	5	5	5.4	4.23	3.7e-10	14	14	14.7	5.63	3.6e-10	8	8
[87]		WP_011088686.1	36	85	90.2	12.68	7e-23	31	81	72.6	10.94	1.2e-19	33	91	75.4	11.88	2.1e-21	34	71	76.6	10.4	1.2e-18	37	74	82.7	11.86	2.4e-21	39	97	76.6	11.27	2.9e-20	35	91	69.3	11.98	1.4e-21	36	93	76.6	12.47	1.8e-22	32	89	81.4	10.13	3.7e-18	34	80
[88]		WP_039185890.1	30	45	50.9	10.43	1e-18	30	50	60.6	10.42	1.1e-18	34	52	69.2	10.05	5.3e-18	38	48	65.2	10.12	4e-18	36	46	60.4	8.79	1.2e-15	40	56	70.8	9.71	2.2e-17	35	55	60.4	10.46	9.3e-19	39	61	65.8	10.46	9.3e-19	30	45	66.1	10.26	2.1e-18	37	49
[89]		WP_011086916.1	33	44	50.7	10.17	3.2e-18	38	45	53.4	9.86	1.2e-17	39	49	63.1	11.23	3.5e-20	37	46	55.8	9.39	8.9e-17	35	44	53.9	13.64	1.2e-24	41	52	53.1	9.68	2.5e-17	44	59	65.3	10.67	3.7e-19	45	57	60.8	9.1	3e-16	37	48	54.9	8.88	7.8e-16	43	56
[90]		WP_011086907.1	37	58	74.1	10.72	3.1e-19	34	56	68.5	10.32	1.6e-18	37	58	68	11.01	8.8e-20	35	53	74.1	9.5	5.4e-17	33	48	65.4	9.81	1.5e-17	34	53	61.5	9.96	7.8e-18	36	59	72.6	10.78	2.4e-19	37	60	74.6	9.82	1.4e-17	36	57	72.2	9.99	6.9e-18	37	59
[90-1]	2	WP_035668747.1	2	3	5.9	3.52	5.3e-09	2	3	5.9	9.45	6.8e-17	1	1	2.4	4.13	3.7e-10	1	1	3.5	1.58	3.3e-06											2	3	5.9	9.47	6.2e-17	2	2	5.9	9.82	1.4e-17	2	2	5.9	4.47	4.7e-10	1	1
[91]		WP_011089836.1	35	56	61.8	10.71	3.1e-19	39	60	64	9.71	2.2e-17	40	65	65.9	10.02	6e-18	39	58	66.4	9.94	8.4e-18	28	40	54	8.93	6.2e-16	36	51	59.2	10.45	9.7e-19	34	50	60.7	10.36	1.4e-18	36	54	62.7	11.41	1.6e-20	39	65	72	11.2	4e-20	43	69
[92]		WP_008145224.1	36	95	86.3	13.39	3.4e-24	30	83	58.7	13.13	1e-23	33	92	74.2	14	2.6e-25	34	74	70.8	10.37	1.3e-18	33	67	73	9.25	1.6e-16	40	92	73.3	15.98	5.6e-29	35	84	84.2	12.38	2.5e-22	39	91	74.8	15.22	1.4e-27	32	83	71.4	14.7	1.3e-26	33	76
[93]		WP_011084339.1	31	96	76.7	11.58	7.8e-21	23	65	73.4	10.86	1.7e-19	28	90	67.5	11.45	1.3e-20	30	73	77.6	11.44	1.4e-20	30	56	80.6	11.84	2.5e-21	33	84	80.9	12.58	1.1e-22	30	88	76.7	8.98	5e-16	28	77	68.7	11.56	8.3e-21	26	76	74.9	11.33	2.3e-20	31	72
[94]		WP_049832605.1	36	43	46.3	9.92	9.3e-18	40	51	39.7	9.33	1.2e-16	41	56	47.9	10.67	3.7e-19	38	44	47.2	11.04	7.7e-20	33	39	43.1	10.44	1e-18	40	56	45	9.64	3.1e-17	38	52	46.5	9.73	2e-17	42	55	49.4	10.9	1.4e-19	34	44	44	10	6.5e-18	34	41
[95]		WP_028170829.1	27	68	56.2	11.15	4.9e-20	26	50	48.5	11.81	2.9e-21	32	77	65.3	12.48	1.7e-22	28	51	55.4	11.2	3.9e-20	20	32	46	12.25	4.4e-22	28	59	66.1	10.89	1.4e-19	28	57	64.5	11.96	1.5e-21	31	64	60.9	12.25	4.4e-22	30	63	70.5	11.76	3.7e-21	21	46
[95-1]	18	WP_011086976.1	15	24	52.9	11.37	1.9e-20	10	14	42.4	10	6.5e-18	12	17	54.3	9.41	8.1e-17	11	15	39.9	8.95	5.7e-16	10	12	34.2	7.52	2.5e-13	14	21	52.6	9.27	1.5e-16	13	21	40.8	8.74	1.4e-15	13	18	41.3	10.99	9.6e-20	10	17	35.3	9.7	2.3e-17	10	13
[95-2]	12	WP_028170831.1	9	9	25.1	9.46	6.5e-17	9	9	27.9	9.79	1.6e-17	7	7	16.9	4.28	1.7e-09	7	7	22.7	8.6	2.5e-15						3	3	14.1	5.97	8.5e-11	2	2	5.8	8.95	5.8e-16	1	1	4.4	9.84	1.3e-17	8	8	21.3	8.83	9.7e-16	6	6
[95-3]	8	WP_011090540.1	8	9	27.3	9.46	6.5e-17	5	6	18.2	9.79	1.6e-17	4	4	11	3.24	2.9e-07	4	4	12.9	8.6	2.5e-15	1	2	3	3.01	7.3e-08	2	2	8.3	3.57	8e-08	3	3	12.7	8.95	5.8e-16	1	1	4.4	9.84	1.3e-17	6	6	19.6	8.83	9.7e-16	4	5
[96]		WP_011084315.1	37	60	83.5	11.2	3.9e-20	35	56	77	10.65	4.2e-19	36	58	83.5	9.71	2.2e-17	37	57	77.3	10.9	1.4e-19	36	52	75.3	9.73	2e-17	35	55	81.4	10.63	4.4e-19	35	58	91.4	10.09	4.4e-18	33	49	82.8	10.21	2.7e-18	37	61	83.5	10.94	1.2e-19	37	54
[97]		WP_038965519.1	21	36	50.3	16.12	3e-29	20	32	46.2	15.51	4.1e-28	23	35	52.2	14.33	6.4e-26	17	28	45.3	11.39	1.8e-20	24	40	53.3	12.24	4.6e-22	30	59	60.2	18.04	8.5e-33	28	58	63.2	18.58	8.5e-34	30	66	62.1	16.14	2.8e-29	18	29	47.3	12.49	1.6e-22	18	31
[98]		WP_011085941.1	33	45	54.2	9.13	2.6e-16	31	42	57.4	9.47	6.3e-17	34	47	54.6	9.22	1.8e-16	31	39	46.6	9.25	1.6e-16	30	38	51.8	8.55	3.2e-15	34	48	58.9	8.97	5.3e-16	30	43	45.1	8.16	1.7e-14	41	56	70.2	10.89	1.4e-19	28	37	49.4	9.68	2.5e-17	32	46
[99]		WP_011089237.1	39	84	71.7	9.23	1.8e-16	38	77	70.8	12.19	5.7e-22	40	83	77.6	11.65	5.8e-21	40	69	66.1	9.91	9.7e-18	40	60	65.5	10.3	1.9e-18	47	87	75.8	10.3	1.8e-18	41	86	68.1	10.07	4.9e-18	39	75	63.1	9.9	1e-17	40	81	68.1	9.69	2.5e-17	41	78
[100]		WP_038965507.1	38	58	90.9	10.33	1.6e-18	35	52	86.1	10.94	1.2e-19	37	56	90.9	10.04	5.4e-18	29	41	76.5	10.83	1.9e-19	29	38	67.7	10.1	4.2e-18	35	52	89.3	11.71	4.5e-21	35	51	82.7	10.47	8.9e-19	38	58	90.9	10.77	2.4e-19	39	64	87.5	10.41	1.1e-18	38	50
[101]		WP_011090084.1	35	53	50.2	9.76	1.8e-17	41	62	50.8	8.62	2.4e-15	40	69	47.6	9.83	1.4e-17	42	61	51.5	11.19	4e-20	39	53	45.9	10.24	2.4e-18	39	62	46.2	10.64	4.4e-19	33	53	46.5	9.31	1.2e-16	40	64	45.8	10.25	2.2e-18	34	54	45.3	10.1	4.2e-18	37	57
[102]		WP_063921556.1	29	42	58.2	10.82	1.9e-19	24	36	58.7	9.65	2.9e-17	32	49	61.4	11.17	4.4e-20	25	35	50.9	9.65	2.9e-17	21	26	52.3	9.7	2.4e-17	24	31	44.3	9.69	2.4e-17	24	30	56.2	9.69	2.4e-17	23	34	59.9	10.8	2.1e-19	25	41	58.2	11.05	7.3e-20	22	28
[102-1, 789-1]	15	WP_011083735.1	12	17	36	10.94	1.2e-19	9	10	22.5	7.69	1.2e-13	14	17	34.8	7.88	5.5e-14	13	14	25.2	8.79	7e-16	2	2	2.9	2.38	3.7e-08	3	4	5.6	6.78	3e-12	6	6	11.8	9	4.2e-16	5	5	11	9.08	1.2e-16	10	15	27.7	7.33	5.7e-13	9	9
[102-2, 789-2]	4	WP_063921375.1	4	6	14.3	7.61	1.7e-13	4	4	14.3	7.69	1.2e-13	3	4	8.6	7.88	5.5e-14	5	5	14.3	8.79	7e-16	2	2	4.4	2.62	3.7e-08	3	3	11.1	6.78	3e-12	3	3	11.1	9	4.2e-16	3	3	11.1	9.08	1.2e-16	3	5	8.6	7.33	5.7e-13	3	3
[103]		WP_011089552.1	32	43	60	9.94	8.5e-18	33	39	58.8	10.52	7e-19	36	46	58.2	9.57	4e-17	35	42	54.8	10.12	3.9e-18	30	37	51.5	9.9	1e-17	41	53	67.5	10.44	1e-18	35	43	56.4	10.77	2.4e-19	42	54	64.4	10.24	2.3e-18	31	40	55.3	8.56	3.1e-15	35	40
[104]		WP_011090853.1	38	44	38.7	11.35	2e-20	33	39	30.8	10.25	2.3e-18	43	52	44.3	10.15	3.4e-18	33	38	38.6	10.84	1.8e-19	40	44	42.7	10.49	8e-19	40	49	44.7	11.32	2.4e-20	39	47	40.3	11.52	9.8e-21	44	53	40.2	11.29	2.7e-20	39	51	38.9	10.84	1.8e-19	39	45
[105]		WP_011086650.1	38	49	36.8	9.57	4.1e-17	30	39	27.5	9.02	4.3e-16	37	46	31.5	9.51	5.3e-17	35	43	28.4	8.22	1.3e-14	40	51	36.2	8.86	8.3e-16	42	54	36.3	9.99	6.7e-18	41	54	36.2	9.55	4.4e-17	44	58	36.7	9.6	3.6e-17	30	39	29	9.9	1e-17	30	37
[105-1]	13	WP_011083817.1	7	7	9	4.86	1.1e-09	9	9	11.3	5.91	2.4e-10	7	7	8.6	5.55	2.5e-10	11	11	13.9	5.3	5.5e-10	7	7	8	5.05	4.8e-10	11	11	12.8	6.19	8.9e-12	8	8	10.8	4.81	7.1e-10	10	10	14.4	8.04	2.8e-14	7	7	8.2	4.41	1.5e-08	7	7
[106]		WP_011083410.1	37	51	56.2	11.88	2.2e-21	31	44	57.5	14.46	3.5e-26	38	52	61.7	11.33	2.2e-20	34	43	56.8	11.66	5.4e-21	30	38	56	13.99	2.7e-25	34	44	59.8	13.55	1.7e-24	31	45	60.2	13.57	1.6e-24	35	45	61.5	13.64	1.2e-24	32	46	50.4	11.27	3e-20	31	44
[107]		WP_011083334.1	33	55	65.9	10.24	2.3e-18	30	41	60.3	10.47	8.9e-19	30	39	70.5	10.13	3.8e-18	28	36	64.9	8.88	7.8e-16	33	42	70	8.8	1.1e-15	34	50	85.7	9.33	1.2e-16	40	56	71.6	10.48	8.3e-19	37	53	68.6	10.31	1.7e-18	26	43	65.9	9.41	8.1e-17	31	46
[108]		WP_011083693.1	39	44	43.4	8.1	2.1e-14	41	45	42.9	9.16	2.4e-16	39	44	37.7	8.27	1e-14	44	47	46.5	8.56	3.1e-15	41	44	43.2	9.08	3.3e-16	49	51	52.4	9.22	1.8e-16	42	47	41.3	9.21	1.9e-16	41	47	41.4	8.57	2.9e-15	40	45	40.6	9.28	1.4e-16	46	49
[109]		WP_038967487.1	36	37	41.4	8.52	3.6e-15	39	44	40.6	7.67	1.4e-13	40	42	41.9	8	3.3e-14	44	50	49.2	7.47	3.2e-13	39	45	42.2	7.18	1.1e-12	49	55	57.8	7.31	6.3e-13	39	45	45.6	7.83	6.7e-14	43	49	49.4	8.43	5.2e-15	40	46	45.9	9.15	2.4e-16	41	46
[109-1]	14	WP_011087374.1	11	13	16.7	7.53	2.4e-13	10	11	13.5	6.12	9.9e-11	6	7	10.7	7.23	8.7e-13	8	8	13.2	7.07	1.7e-12	5	6	8	4.27	1.7e-08	8	9	11.7	6.65	1.1e-11	9	10	12.4	6.9	3.5e-12	8	10	13.1	6.85	4.5e-12	8	9	10.7	7.36	5.1e-13	7	8
[110]		WP_038965288.1	34	53	61.5	9.27	1.4e-16	34	55	62.3	9.58	4e-17	33	54	55.8	9.36	1e-16	39	55	74.7	9.35	1e-16	31	35	57.5	9.97	7.5e-18	39	51	65.1	9.78	1.7e-17	35	57	62.5	8.72	1.5e-15	39	56	59.2	9.46	6.4e-17	38	66	62.5	8.88	7.7e-16	36	56
[111]		WP_011088342.1	36	48	57.5	11.78	3.3e-21	36	48	52.4	14.17	1.2e-25	36	52	54.9	14.2	1.1e-25	41	61	63.2	11.19	4.1e-20	32	36	56.5	7.39	4.4e-13	34	43	53.5	9.48	6e-17	38	51	50.4	9.9	1e-17	32	43	47.2	11.85	2.5e-21	38	54	61	12.76	5e-23	38	51
[112]		WP_011087794.1	31	80	67.4	11.4	1.6e-20	30	70	60	12.19	5.7e-22	34	80	62.5	12.48	1.7e-22	29	61	55.6	11.43	1.5e-20	32	68	66.2	9.76	1.9e-17	35	77	55.8	10.4	1.2e-18	27	73	50	12.1	8.4e-22	32	74	51.9	11.83	2.7e-21	34	81	67.4	11.51	1e-20	32	71
[113]		WP_011085132.1	34	49	52.7	17.74	3.1e-32	34	46	52.7	19.03	1.2e-34	29	45	49.2	13.55	1.7e-24	37	48	53.5	18.99	1.5e-34	28	35	46.9	9.23	1.8e-16	28	36	45.7	13.97	2.9e-25	31	42	50.3	19.22	5.6e-35	32	42	51.7	21.06	2.1e-38	32	45	52.7	14.43	4.1e-26	32	40
[113-1]	25	WP_011085134.1	28	40	42.1	17.84	2e-32	27	34	45.4	14.54	2.5e-26	20	29	35.9	8.83	9.5e-16	26	32	48.1	8.32	8.3e-15	22	24	37.9	8.59	2.7e-15	25	31	40.3	9.49	5.8e-17	24	33	39.8	16.91	1e-30	26	32	46.1	15.12	2.1e-27	24	33	38.9	8.38	6.4e-15	23	29
[114]		WP_011085744.1	32	46	82	12.16	6.6e-22	29	38	72.8	12.02	1.2e-21	32	42	82.4	10.75	2.7e-19	32	40	79.3	11.13	5.2e-20	35	44	78.8	11.61	6.9e-21	38	51	87.8	11.6	7.2e-21	27	35	69.5	11.93	1.7e-21	35	48	84.2	10.96	1.1e-19	29	45	80	12.13	7.3e-22	35	47
[115]		WP_028171108.1	36	44	52.3	9.95	8.2e-18	35	43	48.7	9.56	4.3e-17	42	49	53.4	9.75	1.9e-17	33	40	47.1	8.96	5.4e-16	32	34	42.4	8.28	1e-14	34	41	50.9	10.02	5.9e-18	38	46	46.6	9.56	4.3e-17	40	49	53.2	10.15	3.4e-18	41	52	50.2	9.59	3.8e-17	33	40
[116]		WP_011087644.1	37	50	55.1	10.41	1.1e-18	34	47	60.1	9.93	8.9e-18	37	55	61.3	10.59	5.3e-19	33	44	57.4	10.97	1.1e-19	32	35	60.1	9.91	9.6e-18	33	45	61.5	10.59	5.2e-19	32	49	53.5	10.27	2.1e-18	32	42	58.1	9.88	1.1e-17	31	47	51.7	9.78	1.7e-17	33	42
[117]		WP_011083353.1	27	45	62.9	10.67	3.7e-19	30	49	60	10.09	4.5e-18	37	57	69.7	9.92	9.1e-18	29	38	57.5	11.54	9.3e-21	30	38	61.8	9.65	2.9e-17	33	47	63.1	10.61	4.8e-19	36	55	64.5	10.63	4.5e-19	38	55	61.8	9.36	1e-16	34	52	68.8	10.53	6.8e-19	33	47
[118]		WP_011089425.1	37	53	55.2	11.23	3.5e-20	32	45	51.5	9.84	1.3e-17	35	50	58.5	12.07	9.7e-22	33	42	48.8	9.7	2.4e-17	31	43	54.5	9.03	4e-16	34	48	56.5	10.1	4.2e-18	36	47	54.8	12.5	1.5e-22	32	44	50.6	10.29	1.9e-18	35	49	54.1	9.75	1.9e-17	28	42
[119]		WP_011083758.1	36	60	75.2	8.98	5e-16	30	40	70.5	9.46	6.6e-17	34	47	73.5	9.44	7.1e-17	34	43	76.8	10.09	4.5e-18	28	34	61.4	8.11	2e-14	36	51	67.2	10.33	1.6e-18	32	47	71.2	9.46	6.4e-17	39	53	82.2	10.31	1.7e-18	34	52	75.9	10.66	3.9e-19	34	50
[120]		WP_011088614.1	34	46	66.8	10.68	3.6e-19	34	47	58.9	9.36	1e-16	35	57	60.6	11.22	3.6e-20	42	55	69.3	10.38	1.3e-18	32	41	53.5	7.88	5.5e-14	42	57	62.7	9.89	1e-17	37	58	66.4	10.42	1.1e-18	41	59	68.7	10.83	1.9e-19	35	56	56.2	10.9	1.4e-19	35	50
[121]		WP_011085276.1	40	49	51.5	11.19	4.1e-20	38	46	49.2	8.56	3e-15	38	46	52.8	9.97	7.6e-18	44	52	62.1	9.93	8.8e-18	34	40	44.2	10.84	1.8e-19	38	46	50.1	10.77	2.5e-19	39	47	46.2	10.2	2.8e-18	39	49	47.9	11.9	2e-21	29	37	38.4	8.49	4.1e-15	31	39
[122]		WP_028171097.1	38	49	61.5	9.74	2e-17	28	36	55.1	9.48	5.9e-17	36	48	65.7	9.92	9.2e-18	34	40	57.5	9.31	1.2e-16	31	38	54.3	9.89	1e-17	34	45	60.1	9.98	7.2e-18	34	43	66.5	9.46	6.5e-17	38	49	63.3	9.75	1.9e-17	30	40	54.9	9.68	2.6e-17	29	38
[123]		WP_011087547.1	28	44	68.5	10.95	1.1e-19	28	43	66.7	9.98	7.2e-18	28	45	73.8	9.84	1.3e-17	28	39	65.2	10.05	5.2e-18	25	32	51.7	10.21	2.7e-18	33	44	79.2	12.01	1.2e-21	27	40	76.7	12.11	8.2e-22	33	48	78.9	11.67	5.2e-21	28	42	74.7	11.42	1.5e-20	30	49
[124]		WP_011089789.1	33	51	76.7	10.48	8.3e-19	25	43	48.4	7.64	1.5e-13	31	53	74.4	10.86	1.7e-19	27	46	56.3	9.12	2.8e-16	28	37	63	8.89	7.4e-16	27	42	60.2	9.54	4.7e-17	31	50	62.6	8.9	7.1e-16	35	55	81.6	11.62	6.6e-21	27	44	55.8	8.83	9.7e-16	28	47
[125]		WP_028174309.1	42	50	47.6	9.84	1.3e-17	38	52	51.4	10.89	1.5e-19	39	51	51.8	10.4	1.2e-18	33	38	45.4	10.26	2.2e-18	34	43	41.4	10.26	2.2e-18	43	55	52.6	11.1	6.1e-20	42	52	53.3	9.94	8.5e-18	43	50	51.4	11.34	2.2e-20	42	51	54.2	11.48	1.2e-20	32	39
[126]		WP_063921386.1	32	45	52.5	8.56	3e-15	33	47	49.2	9.9	9.8e-18	31	43	48.2	8.91	6.8e-16	36	45	49.5	8.61	2.4e-15	27	33	40.9	7.7	1.2e-13	37	51	56	10.03	5.7e-18	37	48	53	10.62	4.6e-19	36	50	51.2	11.19	4.1e-20	34	49	54.2	10.61	4.9e-19	33	47
[127]		WP_011087576.1	33	41	48.6	7.61	1.7e-13	33	40	50.3	8.32	8.3e-15	36	43	51.7	8.16	1.7e-14	36	42	50	7.4	4.3e-13	29	32	43.2	7.77	8.8e-14	36	44	52.7	7.83	6.7e-14	36	44	54	10.63	4.5e-19	39	48	48.9	7.64	1.5e-13	41	52	59	11.38	1.8e-20	40	48
[128]		WP_236842259.1	28	38	48.7	9.9	1e-17	31	48	47	11.61	6.9e-21	31	46	49.6	10.16	3.3e-18	38	54	54	11.76	3.6e-21	38	51	55.5	13.12	1.1e-23	38	60	49	11.75	3.8e-21	36	54	67	11.87	2.3e-21	35	57	49.7	11.85	2.4e-21	34	50	53.9	9.43	7.3e-17	35	52
[129]		WP_038966050.1	39	50	57.1	10.96	1.1e-19	39	55	61.1	11.54	9e-21	35	49	59.6	10.76	2.6e-19	40	51	60.4	10.85	1.7e-19	35	39	53.9	8.02	3e-14	33	44	58.5	11.2	4e-20	36	47	59.8	11.5	1.1e-20	34	44	57.1	11.16	4.6e-20	39	46	65	10.91	1.3e-19	38	46
[130]		WP_011087678.1	29	41	66.7	8.47	4.4e-15	35	48	69.8	8.36	7.1e-15	31	45	65.5	10.38	1.3e-18	33	43	64.4	8.78	1.2e-15	33	40	62.8	8.23	1.2e-14	36	47	66.2	15.55	3.4e-28	31	44	57.4	10.73	3e-19	35	47	76.9	11.05	7.4e-20	29	40	60.5	9.92	9.1e-18	31	42
[131]		WP_011083607.1	35	54	67.4	10.53	6.8e-19	26	41	39.7	9.61	3.4e-17	37	51	66.4	12.43	2e-22	36	48	55	9.65	3e-17	33	39	61.8	9.65	2.9e-17	33	50	58.4	10.02	5.9e-18	32	46	52.6	10.36	1.4e-18	38	55	67.9	10.97	1e-19	37	57	64.9	10.72	3e-19	28	46
[132]		WP_011086681.1	36	46	51.7	11.13	5.3e-20	30	37	40	9.23	1.8e-16	29	37	35.6	10.66	3.9e-19	30	38	33.1	11.38	1.8e-20	26	31	32.3	10.62	4.6e-19	34	42	47.2	9.7	2.3e-17	34	47	35.9	11.22	3.6e-20	37	48	48.4	11.03	8e-20	39	51	51.4	10.88	1.5e-19	35	46
[133]		WP_011088141.1	30	77	75.7	10.83	1.9e-19	28	50	72.4	10.26	2.1e-18	29	52	76.2	11.33	2.2e-20	30	46	76.2	10.03	5.8e-18	32	38	76.2	10.76	2.6e-19	31	58	75.7	11.66	5.4e-21	32	66	72.4	12.37	2.7e-22	33	59	76.2	11.45	1.3e-20	31	52	71.9	10.94	1.2e-19	32	54
[134]		WP_011084291.1	31	38	62.9	9.51	5.2e-17	24	34	47.8	10.01	6.2e-18	30	41	55.8	9.48	5.9e-17	31	35	60	10.35	1.4e-18	29	35	53.8	8.41	5.8e-15	39	46	69	9.62	3.3e-17	32	43	61.4	9.82	1.4e-17	31	46	55.3	9.48	6.1e-17	27	34	54.5	8.77	1.3e-15	34	44
[135]		WP_011087378.1	31	43	54.8	7.68	1.3e-13	36	59	59.2	9.03	4.1e-16	31	50	53	9.37	9.4e-17	36	54	53.1	8.09	2.3e-14	27	38	44.7	7.49	2.8e-13	29	47	47	7.94	4.3e-14	32	45	49.8	8.2	1.4e-14	34	50	55.3	8.41	5.7e-15	30	47	47.2	9	4.6e-16	31	44
[135-1]	1	WP_011084447.1	2	2	2.6	6.24	6.1e-11	2	2	2.6	5.86	3e-10	1	1	1.8	4.15	3.1e-09	2	3	2.6	5.73	1.8e-10	2	2	2.6	3.5	2.3e-09	3	3	4.9	6.35	3.7e-11	2	2	2.6	5.8	3.9e-10	2	2	2.6	5.19	3.7e-09	2	2	2.6	5.57	1e-09	2	2
[136]		WP_011089881.1	34	49	50.8	8.26	1.1e-14	39	59	48.6	9.79	1.6e-17	28	47	48.1	8.94	6.1e-16	36	53	47.7	6.64	1.1e-11	31	44	48.3	7.47	3.1e-13	38	60	46.4	7.79	8.2e-14	37	59	51.4	9.19	2e-16	39	58	50.8	8.67	1.9e-15	38	58	53.1	8.06	2.6e-14	42	62
[137]		WP_011085405.1	30	37	63.5	9.69	2.4e-17	26	34	49.3	9.23	1.8e-16	34	48	68.8	10.71	3.1e-19	31	39	46.9	10.29	1.9e-18	24	29	44.5	10.3	1.8e-18	33	39	61.4	10.25	2.2e-18	28	37	53.3	10.13	3.8e-18	36	45	60.3	11.99	1.4e-21	27	36	46.3	9.81	1.4e-17	31	40
[138]		WP_011088176.1	29	52	72.3	10.48	8.6e-19	28	46	67.1	10.93	1.2e-19	31	57	72.3	11.6	7.2e-21	31	49	72.6	11.29	2.7e-20	27	38	66.8	11.9	2e-21	33	59	72.3	10.86	1.6e-19	29	52	61.1	10.64	4.3e-19	33	55	72.6	11.43	1.5e-20	27	55	77.7	12.83	3.8e-23	28	50
[139]		WP_011085848.1	32	53	69.2	10.15	3.4e-18	28	44	67.9	11.01	8.6e-20	32	55	70	10.49	8.1e-19	32	49	79.3	11.47	1.2e-20	31	41	71.3	10	6.5e-18	35	55	76.3	10.63	4.4e-19	33	55	81.2	9.57	4e-17	36	53	76.1	9.88	1.1e-17	30	48	65.3	10.16	3.3e-18	32	49
[140]		WP_028172378.1	40	47	75.3	11.39	1.7e-20	35	40	57.9	8.93	6.2e-16	36	42	66.8	12.08	9.2e-22	36	41	62.8	10.85	1.7e-19	35	37	68.5	11.41	1.6e-20	33	38	67.8	9.5	5.5e-17	35	39	64.9	10.83	1.9e-19	31	34	56.9	10.69	3.5e-19	37	45	74.8	10.83	1.9e-19	33	38
[140-1, 222-1]	17	WP_011086636.1	11	13	24.6	7.6	1.8e-13	11	13	27.8	8.29	9.8e-15	12	14	27.5	6.15	8.9e-11	12	12	20.1	4.97	8.8e-10	9	10	18.4	5.35	2.6e-10	8	9	18.6	4.2	6.4e-08	6	6	14.6	7.87	5.8e-14	6	6	13.6	7.3	4.5e-13	12	13	29.8	8.07	2.5e-14	10	11
[141]		WP_011087775.1	38	44	42.4	9.49	5.8e-17	34	42	38	8.09	2.2e-14	33	40	36.6	7.87	5.7e-14	32	36	33.9	7.26	7.9e-13	28	30	33.6	7.92	4.7e-14	41	52	44.4	10.62	4.6e-19	33	40	42.4	8.51	3.7e-15	40	49	42.9	10.29	1.9e-18	33	41	36.7	8.42	5.5e-15	33	43
[142]		WP_011083283.1	32	82	49.5	9.95	8.1e-18	31	78	54.1	8.85	9e-16	36	78	61.4	10.12	4e-18	35	77	61.6	9.83	1.3e-17	30	63	53.4	10.1	4.2e-18	36	80	67.9	9.78	1.7e-17	37	82	70.8	8.97	5.3e-16	37	86	55.1	10.44	1e-18	32	76	59.7	9.71	2.3e-17	33	69
[143]		WP_011085025.1	38	38	22.1	6.55	1.6e-11	43	46	25.3	7.79	8.2e-14	45	46	27.1	7.36	5.1e-13	33	33	19.6	6.32	1.6e-11	31	31	17.8	6.17	6.6e-12	35	35	22.5	6.9	3.6e-12	37	39	21	7.58	2e-13	34	36	19.5	7.35	5.4e-13	40	42	21.6	7.86	6.1e-14	39	39
[144]		WP_011087682.1	29	38	62.3	10.33	1.6e-18	30	40	61.1	10.2	2.8e-18	29	42	65.8	10.21	2.7e-18	29	40	65.3	9.77	1.8e-17	23	30	44	10.18	3e-18	31	40	63.6	11.13	5.4e-20	33	42	69.8	10.61	4.9e-19	36	49	70.4	10.55	6.3e-19	28	41	62.6	10.92	1.3e-19	29	37
[145]		WP_097532087.1	32	47	52.9	10.68	3.7e-19	29	44	47.1	10.13	3.7e-18	32	58	50	9.56	4.2e-17	33	50	52.3	9.29	1.4e-16	30	40	50.9	7.61	1.8e-13	32	50	50.8	9.09	3.1e-16	35	52	58.4	9.24	1.7e-16	33	46	52.9	9.48	6.1e-17	34	53	52	9.8	1.6e-17	36	51
[146]		WP_011083332.1	29	52	75.9	10.72	3e-19	24	40	54.4	9.89	1.1e-17	33	58	84.6	11.78	3.4e-21	31	47	76.5	10.21	2.6e-18	24	32	58.7	8.32	8.4e-15	31	48	82.8	10.86	1.7e-19	29	51	76.7	12.21	5.2e-22	27	44	62.5	11.49	1.2e-20	27	51	72.7	12.01	1.2e-21	25	42
[147]		WP_028174621.1	34	41	76.2	11.96	1.6e-21	29	36	56.6	9.89	1e-17	30	37	69.3	11.59	7.5e-21	32	38	62	10.8	2.1e-19	28	32	58.7	9.2	2e-16	35	41	61.1	10.17	3.2e-18	29	37	58.3	11.36	1.9e-20	30	36	61.1	11	9.3e-20	35	47	71.9	11.16	4.7e-20	36	44
[148]		WP_011084127.1	34	44	57.2	8.82	9.8e-16	34	49	64.6	9.56	4.2e-17	36	50	62.3	8.88	7.6e-16	33	41	61	8.33	8.1e-15	21	23	38.2	9.5	5.4e-17	38	46	62.3	9.28	1.4e-16	37	46	68.6	9.53	4.9e-17	32	38	55.8	8.74	1.4e-15	35	47	60.4	9.93	8.6e-18	34	43
[149]		WP_011086701.1	32	51	83.5	10.65	4.1e-19	25	38	59.6	10.42	1.1e-18	30	52	65.8	9.98	7.3e-18	27	34	61.2	9.39	8.7e-17	22	29	51.2	9.23	1.7e-16	29	39	58.1	10.42	1.1e-18	28	44	67.6	10.68	3.6e-19	30	48	65.6	10.56	6e-19	29	41	64.8	10.24	2.3e-18	26	37
[150]		WP_011090136.1	36	49	62	11.66	5.5e-21	30	46	42.5	8.31	8.7e-15	36	51	58.8	12.12	7.6e-22	30	39	44.6	8.13	1.9e-14	33	45	61.2	11.69	4.9e-21	37	50	66	12.13	7.5e-22	35	49	63.9	11.75	3.7e-21	38	54	60.7	8.33	8.1e-15	33	45	55.2	11.77	3.5e-21	34	47
[151]		WP_011083746.1	42	49	55.4	9.38	9.2e-17	37	42	45.9	9.66	2.7e-17	35	42	46.9	9.58	3.9e-17	34	40	46.2	8.36	7.1e-15	37	42	46.2	8.51	3.8e-15	43	47	56.8	9.55	4.5e-17	35	39	41.6	9.39	8.7e-17	38	43	53.5	9.8	1.5e-17	37	43	49.9	9.66	2.8e-17	37	42
[152]		WP_011083287.1	30	58	70.4	10.01	6.3e-18	29	56	69.6	9.86	1.2e-17	33	53	67.6	11.17	4.5e-20	26	42	68.1	9.95	8.2e-18	32	41	72.6	9.05	3.7e-16	34	47	72.6	9.02	4.4e-16	28	53	68.3	11.46	1.3e-20	32	52	70.4	10.06	5e-18	28	48	68.1	10.24	2.4e-18	34	46
[153]		WP_011087629.1	32	104	86.1	12.7	6.7e-23	27	67	56.8	11.11	5.9e-20	30	85	79.8	11.32	2.4e-20	26	57	55.9	11.93	1.8e-21	29	59	78.2	10.79	2.2e-19	31	79	71.3	10.21	2.7e-18	32	81	81.9	12.02	1.2e-21	34	87	84	11.35	2e-20	29	84	79.5	11.1	6.1e-20	28	62
[154]		WP_011084295.1	35	45	51.4	9.71	2.2e-17	35	51	53	10.2	2.8e-18	36	48	52.8	9.9	1e-17	32	39	47	9.09	3.2e-16	37	47	49.7	8.27	1.1e-14	37	47	54.6	8.89	7.4e-16	36	49	51.9	8.9	7e-16	40	54	57.9	9.02	4.3e-16	37	48	50.1	7.34	5.4e-13	37	45
[155]		WP_011088166.1	28	44	64	9.85	1.2e-17	26	39	62.1	9.3	1.3e-16	32	53	73.2	10.2	2.8e-18	26	37	60.4	9.9	1e-17	20	30	48.8	9.41	8e-17	28	41	61.8	9.34	1.1e-16	30	43	76.8	10.53	6.7e-19	32	51	78.2	10.95	1.1e-19	27	45	68	11.83	2.7e-21	27	43
[156]		WP_011087516.1	31	44	57.8	11.22	3.6e-20	27	36	43.3	11.98	1.4e-21	33	44	70.2	12.68	7.1e-23	29	34	47.2	8.02	3e-14	33	40	62.5	8.54	3.3e-15	35	45	61.6	10.01	6.2e-18	32	47	60.5	13.35	4.1e-24	34	49	70.4	11.64	5.9e-21	32	47	64.6	10.89	1.5e-19	30	42
[157]		WP_011088743.1	29	40	72.6	10.47	8.6e-19	26	39	58.2	10.7	3.3e-19	32	46	78.2	11.06	7.1e-20	30	39	68.3	10.75	2.6e-19	33	44	68.7	9.68	2.6e-17	34	50	74.3	10.59	5.3e-19	35	47	85	9.96	7.7e-18	29	38	72.4	10.45	9.7e-19	30	45	76	9.2	1.9e-16	31	40
[158]		WP_028171604.1	34	47	87.8	14.14	1.4e-25	33	39	75.7	8.77	1.3e-15	30	45	74.3	9.5	5.5e-17	30	41	77.7	11.31	2.4e-20	29	40	79.7	9.05	3.8e-16	36	51	80.4	9.37	9.5e-17	31	42	68.9	9.26	1.5e-16	34	47	79.4	8.86	8.6e-16	34	44	88.5	10.29	1.9e-18	33	42
[159]		WP_051000241.1	32	43	51.9	9.46	6.6e-17	31	42	49.1	9	4.6e-16	36	48	55.2	9.62	3.3e-17	29	35	41.1	9.22	1.8e-16	30	35	44	11.08	6.5e-20	28	38	41.5	9.01	4.4e-16	27	37	44.8	9.5	5.5e-17	34	42	48.8	9.38	9.1e-17	31	42	50.7	9.49	5.7e-17	28	39
[160]		WP_011085323.1	32	38	41.5	8.88	7.8e-16	32	42	43.8	9.2	2e-16	32	39	43.1	8.13	1.9e-14	37	42	53.9	9.11	2.9e-16	32	37	38.9	7.8	7.8e-14	34	39	49.9	10.57	5.7e-19	38	46	54.6	10.61	4.9e-19	32	38	41.6	11.07	6.7e-20	34	44	43.1	9.1	3e-16	35	45
[161]		WP_011084337.1	34	60	61.4	8.85	8.9e-16	27	38	50.7	8.65	2.1e-15	31	44	46.8	9.9	9.8e-18	25	36	52.7	8.83	9.7e-16	25	34	63.7	9.13	2.6e-16	33	43	53.5	9.37	9.4e-17	30	43	50.7	8.83	9.6e-16	30	47	50.7	9.09	3.1e-16	30	50	50.7	9.55	4.4e-17	31	45
[161-1]	1	WP_011085370.1	2	3	4.4	8.85	8.9e-16						3	4	7.2	7.99	3.4e-14	1	1	4.4	7.94	4.3e-14	2	2	4.4	8.36	7.1e-15	2	3	4.4	8.48	4.2e-15	2	4	4.4	7.71	1.2e-13	2	3	4.4	7.64	1.5e-13	2	4	4.4	9.55	4.4e-17	2	4
[162]		WP_011088112.1	32	45	63.9	10.11	4.1e-18	31	42	57.5	9.45	6.9e-17	30	41	62	9.6	3.7e-17	28	35	48.8	9.9	1e-17	32	39	55.3	9.42	7.7e-17	32	44	46.5	10.46	9e-19	34	47	60.2	10.24	2.3e-18	34	49	62.7	8.97	5.2e-16	28	37	55.1	9.56	4.3e-17	29	39
[163]		WP_011083747.1	27	47	65.9	10.92	1.3e-19	22	38	57.5	12.54	1.3e-22	30	53	79.6	13.1	1.2e-23	33	52	77.9	12.05	1.1e-21	27	43	64.9	12.26	4.2e-22	30	49	68.9	10.16	3.2e-18	25	41	60.4	10.39	1.2e-18	29	46	71.4	11.55	8.7e-21	30	51	70.9	10.93	1.2e-19	29	44
[164]		WP_011083319.1	31	46	57.9	9.1	3.1e-16	29	52	59.4	10.69	3.4e-19	34	47	58.8	9.62	3.3e-17	31	43	47.2	8.34	7.8e-15	30	39	57.3	10.96	1.1e-19	31	49	51.1	10.62	4.7e-19	32	52	58.3	10.28	1.9e-18	36	51	54.1	9.11	2.9e-16	26	39	45.9	9.53	4.8e-17	28	42
[165]		WP_028173006.1	30	44	69.2	10.9	1.4e-19	28	36	53.7	11.6	7e-21	24	35	50.9	10.75	2.7e-19	26	36	56.8	10.64	4.3e-19	25	28	50.4	9.48	5.9e-17	27	34	57.7	9.29	1.3e-16	27	38	61.9	10.11	4.2e-18	29	38	57.5	10.56	6.1e-19	28	42	60.4	9.84	1.3e-17	31	40
[166]		WP_011087550.1	29	48	63.3	11.22	3.6e-20	27	42	51.4	11.67	5.3e-21	29	45	58.5	11.24	3.3e-20	29	39	63.1	12.41	2.3e-22	23	28	53.6	9.72	2.2e-17	29	45	63.1	11.67	5.3e-21	30	49	65.2	12.39	2.5e-22	29	44	61.3	11.13	5.3e-20	25	43	53.1	10.9	1.4e-19	29	44
[167]		WP_011089175.1	33	44	71.2	10.36	1.4e-18	37	49	69.8	7.82	7e-14	35	46	71	7.89	5.3e-14	37	50	67.1	11.09	6.4e-20	28	31	59.8	9.07	3.4e-16	34	42	60.6	8.25	1.1e-14	34	42	68.1	9.34	1.1e-16	34	44	65	10.12	3.9e-18	30	42	61.9	10.52	7.1e-19	33	44
[168]		WP_011083208.1	34	37	52.4	12.85	3.4e-23	31	36	47.8	13.71	8.6e-25	32	37	47.8	10.29	1.9e-18	37	42	47.5	11.26	3e-20	31	34	45.6	10.31	1.7e-18	33	39	44.9	11.06	7.2e-20	35	40	50.4	12.66	7.7e-23	34	43	48.8	12.06	9.8e-22	32	36	45.4	12.07	9.6e-22	33	35
[169]		WP_011088689.1	30	58	58.1	10.2	2.7e-18	28	58	51.6	11.24	3.3e-20	32	59	60.2	10.57	5.7e-19	33	61	61	10.25	2.2e-18	29	52	53.8	10.47	8.6e-19	31	56	58.6	11.55	8.9e-21	30	60	61	10.99	9.4e-20	28	52	59.4	10.22	2.6e-18	28	56	50.5	10.96	1.1e-19	29	57
[170]		WP_011088452.1	35	77	82.9	10.86	1.7e-19	28	58	79	10.64	4.2e-19	34	69	82.9	10.1	4.3e-18	32	59	82.9	9.12	2.7e-16	26	45	74.6	9.97	7.4e-18	27	52	77.1	10.39	1.2e-18	31	61	69.8	9.81	1.5e-17	31	63	81.5	10.47	8.8e-19	31	61	82.9	10.69	3.5e-19	29	60
[171]		WP_011087218.1	29	42	69.5	10.27	2.1e-18	26	34	66.9	10.32	1.6e-18	28	43	67.8	11.53	9.7e-21	25	35	59.5	10.77	2.4e-19	23	27	53.8	9.61	3.5e-17	23	37	60.4	10.37	1.3e-18	27	41	69.2	9.75	1.9e-17	31	42	70.1	10.3	1.8e-18	29	40	63.9	10.63	4.4e-19	28	43
[172]		WP_011085232.1	31	43	91.8	12.3	3.6e-22	19	26	46.9	9.5	5.5e-17	24	33	64.3	10.2	2.7e-18	23	34	56.1	9.37	9.6e-17	20	24	56.7	7.56	2.1e-13	27	39	75.7	12.09	8.8e-22	27	39	75.5	11.55	8.9e-21	25	35	65.9	11.16	4.7e-20	24	34	66.2	10.19	2.9e-18	28	36
[172-1]	1	WP_038966730.1	2	2	3.6	4.74	8.6e-11	2	2	5.9	6.99	2.4e-12	2	2	3.6	5.06	5.2e-11	1	1	3.1	6.09	2.9e-12	1	1	3.1	2.99	6.3e-09	1	1	3.1	3.03	7e-09	2	2	5.9	5.38	9e-12	3	4	6.4	4.21	1.6e-10	1	1	3.1	6.23	2.6e-12	1	1
[173]		WP_011090541.1	30	42	58.4	12.14	7.1e-22	30	42	61.3	11.76	3.6e-21	31	44	58.2	11.98	1.4e-21	25	35	51.1	11.21	3.8e-20	21	23	42.1	12.01	1.2e-21	27	39	53.7	11.9	2e-21	28	40	46.1	11.49	1.1e-20	28	39	55	11.38	1.8e-20	25	36	43.7	11.22	3.6e-20	26	36
[174]		WP_038967232.1	31	44	62.5	10.65	4e-19	35	51	64.9	8.32	8.3e-15	31	47	63	11.41	1.6e-20	32	41	70.9	8.98	5e-16	28	37	56.9	9.1	3e-16	35	46	65.4	11.04	7.8e-20	33	45	48.2	10.12	3.8e-18	37	50	63.4	9.59	3.7e-17	36	50	63.4	9.24	1.7e-16	32	42
[175]		WP_011089788.1	33	41	58.6	9.57	4.1e-17	31	37	54.2	10.38	1.3e-18	34	43	62.7	9.54	4.7e-17	35	43	61.7	9.48	5.9e-17	21	23	39.9	8.54	3.2e-15	29	34	55.5	10.21	2.7e-18	32	43	63	9.99	6.8e-18	35	44	63	9.87	1.1e-17	32	41	57.9	9.81	1.5e-17	31	35
[176]		WP_011087605.1	32	41	52.7	9.95	8e-18	30	41	46.6	9.44	7e-17	32	40	59.1	10.15	3.5e-18	35	41	54.1	10.97	1e-19	29	34	50.4	11.07	7e-20	36	46	54.1	11.04	7.8e-20	35	43	57.7	10.01	6.2e-18	35	43	61.3	9.78	1.6e-17	31	40	48.6	9.72	2.1e-17	35	43
[177]		WP_011088148.1	29	81	70.8	12.71	6.1e-23	26	71	67.5	10.13	3.8e-18	30	88	69.3	11.74	3.9e-21	26	69	51.3	10.78	2.3e-19	25	43	50.5	8.72	1.6e-15	26	80	63.2	12.19	5.8e-22	29	84	69	10.67	3.8e-19	30	90	70.8	11.83	2.6e-21	24	83	67.1	12	1.3e-21	28	78
[178]		WP_011085328.1	25	36	65.7	10.65	4.1e-19	22	29	48.1	10.07	4.8e-18	23	32	52.6	9.46	6.5e-17	25	27	46.8	7.88	5.5e-14	23	29	51.1	10.33	1.6e-18	34	50	71.8	9.54	4.6e-17	31	50	63.1	10.07	4.8e-18	28	44	56.3	10.53	6.7e-19	22	29	57.1	10.66	3.8e-19	21	23
[179]		WP_011085342.1	33	48	73.6	9.23	1.7e-16	33	44	67.3	7.97	3.8e-14	28	39	70.3	9.04	3.9e-16	37	48	76.1	8.12	2e-14	35	42	66.4	7.83	6.8e-14	36	46	75	7.74	1e-13	33	43	75	9.14	2.5e-16	32	50	70.7	9.48	6e-17	30	39	70	9.5	5.6e-17	38	50
[180]		WP_011087307.1	32	46	56.2	9.12	2.8e-16	31	42	54.9	9.3	1.3e-16	34	51	52.4	8.96	5.6e-16	30	38	52.1	8.95	5.8e-16	25	31	45.5	11.54	9.3e-21	32	42	57.8	8.79	1.1e-15	33	45	57.6	10.9	1.4e-19	36	45	54.5	8.55	3.2e-15	28	39	52.1	9.03	4.2e-16	33	45
[181]		WP_063921530.1	29	30	37.6	12.27	4.1e-22	29	33	35.2	8.5	4e-15	34	38	40.4	7.3	6.6e-13	31	33	38.9	6.84	4.6e-12	34	37	41.4	9.41	8e-17	38	43	44	9.1	3.1e-16	38	42	51.2	8.37	6.8e-15	42	48	55.1	12.48	1.7e-22	37	42	46.8	12.58	1.1e-22	39	43
[182]		WP_011088170.1	31	44	70.8	10.3	1.8e-18	27	42	59.9	12.08	9.2e-22	27	40	59.5	11.55	8.8e-21	29	41	66.2	8.17	1.6e-14	25	31	47.4	8.85	8.6e-16	32	47	63.1	8.88	7.7e-16	28	45	57.6	11.96	1.5e-21	29	41	54.9	11.61	6.8e-21	25	36	61.2	12.33	3.2e-22	27	33
[183]		WP_011083273.1	27	42	60.7	11.73	4.1e-21	21	36	59.7	12.26	4.3e-22	27	44	56.6	13.63	1.2e-24	26	38	59	13.31	4.8e-24	23	37	55.9	12.67	7.4e-23	32	47	61	12.85	3.5e-23	25	41	56.6	14.45	3.8e-26	27	45	60.7	13.33	4.4e-24	22	36	52.4	11.41	1.6e-20	24	37
[184]		WP_011088809.1	33	41	44.5	8.83	9.7e-16	37	48	38.9	8.96	5.6e-16	37	47	45.2	8.81	1e-15	37	46	39.5	8.58	2.8e-15	38	44	41.4	8.82	1e-15	36	42	46.4	8.82	9.9e-16	30	38	39	7.83	6.8e-14	36	41	47.9	8.7	1.7e-15	33	40	40.8	8.63	2.2e-15	35	46
[185]		WP_011087709.1	32	54	54.7	14.18	1.2e-25	25	45	45.3	14.36	5.5e-26	29	48	48.8	13.63	1.2e-24	25	41	50.1	12.47	1.8e-22	25	31	45.3	12.33	3.2e-22	30	48	58.9	12.29	3.7e-22	29	46	53.4	12.25	4.5e-22	27	44	56.7	14.04	2.2e-25	26	54	45.3	13.51	2.1e-24	32	53
[186]		WP_011083205.1	22	32	48.1	9.95	8.1e-18	22	31	68.4	10.67	3.8e-19	28	37	71.1	10.48	8.4e-19	21	29	57.7	9.8	1.6e-17	25	31	58.5	9.8	1.5e-17	24	33	65.3	9.83	1.4e-17	26	39	65.8	9.9	1e-17	23	30	59	9.81	1.5e-17	23	33	64.3	10.89	1.5e-19	25	35
[187]		WP_011090664.1	30	42	67.9	10.72	3e-19	22	31	49.3	10.27	2.1e-18	24	30	44	10.69	3.5e-19	26	35	56.5	10.64	4.2e-19	20	24	50	10.64	4.2e-19	21	29	46.4	10.13	3.8e-18	26	38	58.4	10.38	1.3e-18	26	35	71.8	11.98	1.4e-21	26	39	62.7	11.11	5.8e-20	24	36
[188]		WP_011084241.1	32	38	52.8	10.19	2.9e-18	31	39	48.3	9.47	6.3e-17	36	44	51.4	9.25	1.6e-16	34	42	52	10.06	5e-18	30	36	43.9	8.96	5.4e-16	33	38	51.9	9.12	2.7e-16	37	46	56.1	9.78	1.7e-17	32	43	49.8	10.2	2.8e-18	31	41	49.1	9.26	1.5e-16	33	41
[189]		WP_011085940.1	30	41	61.4	10.74	2.8e-19	27	39	56.7	9.96	7.8e-18	29	38	58.8	8.71	1.6e-15	26	38	53.9	10.86	1.7e-19	27	35	54.6	7.51	2.7e-13	30	40	64.5	9.6	3.6e-17	34	50	63.3	10.04	5.6e-18	33	46	63.3	10.84	1.8e-19	34	48	63.3	9.73	2.1e-17	31	42
[190]		WP_011087135.1	30	79	67.3	11.14	5e-20	28	67	61.3	11.47	1.2e-20	30	73	63.4	11.17	4.5e-20	24	56	53.2	11.88	2.2e-21	24	51	56.2	9.23	1.8e-16	28	64	48.9	9.78	1.7e-17	27	69	62.2	11.23	3.5e-20	30	68	64.3	11.51	1e-20	27	67	58.6	9.12	2.7e-16	30	60
[191]		WP_011087546.1	29	40	57.5	9.79	1.6e-17	30	46	50.5	9.88	1.1e-17	32	44	57.7	9.76	1.8e-17	33	48	63.8	9.99	6.7e-18	32	41	54.3	9.12	2.8e-16	34	46	60.5	9.83	1.4e-17	29	42	51.4	10.03	5.8e-18	37	52	56.9	9.8	1.5e-17	29	41	54.5	10.08	4.6e-18	34	45
[192]		WP_038967106.1	34	48	68	8.61	2.4e-15	32	53	62.4	9.73	2e-17	34	51	67.8	11.28	2.8e-20	30	44	61	11.41	1.6e-20	21	30	51.2	12.22	5.1e-22	32	42	59	10.76	2.6e-19	33	48	64	9.67	2.7e-17	34	49	69.2	9.27	1.5e-16	31	45	66.8	7.39	4.4e-13	30	42
[193]		WP_011085700.1	32	42	57.1	8.42	5.5e-15	30	42	57.1	8.07	2.5e-14	33	46	61.1	8.57	2.9e-15	30	40	51.3	8.85	8.8e-16	25	37	51.5	8.04	2.8e-14	32	46	53.5	9.47	6.4e-17	31	45	52.9	8.84	9.2e-16	34	48	54.9	8.69	1.8e-15	28	38	48.2	10.22	2.6e-18	34	46
[194]		WP_063921497.1	30	47	60.1	10.91	1.3e-19	24	37	48.8	10.01	6.2e-18	27	44	55.1	10.8	2.1e-19	27	39	57.5	9.64	3e-17	22	32	48.3	8.01	3.2e-14	25	37	48.3	9.25	1.6e-16	28	38	49.9	11.94	1.7e-21	28	43	47.8	9.29	1.3e-16	27	46	47.5	11.27	2.9e-20	29	41
[195]		WP_011086745.1	29	35	36.2	7.9	5.1e-14	35	47	35.2	8.29	9.7e-15	33	44	32.9	7.9	5e-14	36	46	34.7	8.4	6e-15	33	38	33.5	9.17	2.2e-16	35	45	36.2	8.68	1.8e-15	36	45	38.2	8.5	3.9e-15	36	44	33.7	8.2	1.4e-14	34	43	40.8	8.66	2e-15	34	42
[196]		WP_011087534.1	25	33	42.7	11.49	1.1e-20	24	30	39.6	10.57	5.7e-19	29	42	45.1	11.51	1e-20	29	39	40.8	9.26	1.5e-16	19	21	27.1	9.89	1e-17	28	41	39	9.32	1.2e-16	29	42	45.5	11.45	1.3e-20	28	41	37.1	10.45	9.5e-19	27	39	42.3	10.33	1.6e-18	26	36
[197]		WP_011085312.1	30	38	46.2	10.09	4.5e-18	31	45	45.5	10.11	4.1e-18	30	39	46	9.22	1.8e-16	26	35	37	10.22	2.5e-18	22	23	35.1	8.22	1.3e-14	23	28	42.6	8.61	2.5e-15	18	23	30.6	9.54	4.7e-17	22	27	38.8	9.34	1.1e-16	27	40	44.1	11.08	6.5e-20	31	41
[198]		WP_038967035.1	26	29	45.1	9.01	4.4e-16	33	36	57.2	9.29	1.3e-16	26	27	46.5	9.54	4.6e-17	29	32	48.7	8.92	6.6e-16	31	34	41.5	8.43	5.2e-15	32	35	49.4	8.87	8.1e-16	31	35	50.2	9.47	6.2e-17	30	31	49.8	8.95	5.8e-16	24	28	39.8	8.2	1.4e-14	26	29
[199]		WP_011088132.1	29	54	69.7	10.72	3e-19	21	47	53.1	9.58	3.9e-17	29	57	69.7	9.67	2.6e-17	22	40	58	11.29	2.7e-20	27	35	78.4	8.48	4.3e-15	24	47	67.6	9.43	7.5e-17	24	48	67.6	11.23	3.5e-20	28	55	78.4	11.14	5e-20	24	55	59.8	10.2	2.8e-18	23	43
[200]		WP_011085792.1	29	38	33.6	10.3	1.8e-18	28	40	29.6	10.08	4.7e-18	32	46	32.5	10.16	3.3e-18	35	47	35.3	10.28	2e-18	33	42	36	9.85	1.2e-17	34	47	39.9	9.95	8.1e-18	33	48	33.8	9.9	1e-17	32	48	35.5	10.73	3e-19	30	41	31.4	10.57	5.6e-19	29	40
[201]		WP_028170962.1	30	48	75	8.81	1e-15	34	50	75.3	8.62	2.4e-15	31	49	69.8	10.61	4.9e-19	25	35	68.9	13.46	2.5e-24	26	33	71	13	1.8e-23	30	40	65.2	12.31	3.4e-22	31	47	75.3	9.74	2e-17	34	50	73.2	10.23	2.4e-18	32	49	75.3	11.59	7.5e-21	31	46
[202]		WP_011089823.1	32	50	69.1	10.54	6.7e-19	26	40	56.7	11.16	4.7e-20	30	39	60	10.77	2.5e-19	28	36	57.1	10.21	2.7e-18	22	29	50.9	8.61	2.5e-15	35	44	67.1	11.53	9.5e-21	32	48	67.6	12.08	9.3e-22	28	38	58	9.71	2.2e-17	30	44	67.3	9.82	1.4e-17	29	42
[203]		WP_011089695.1	32	37	47.5	8.63	2.3e-15	31	43	45.2	11.36	2e-20	26	34	42.7	11.1	6e-20	32	38	43.5	10.54	6.6e-19	28	31	38.9	7.16	1.2e-12	34	40	52.1	9.73	2.1e-17	34	40	50.2	9.09	3.2e-16	30	35	43.5	10.2	2.8e-18	30	36	43.6	9.47	6.3e-17	33	36
[203-1]	14	WP_063921457.1	32	37	50	8.71	1.6e-15	31	44	41.1	11.36	2e-20	29	38	51.3	11.1	6e-20	35	43	53.3	10.54	6.6e-19	29	33	43.8	7.16	1.2e-12	33	40	52.4	9.73	2.1e-17	33	42	51.9	9.09	3.2e-16	31	39	46	10.2	2.8e-18	31	40	49.7	9.47	6.3e-17	33	38
[204]		WP_011083686.1	36	37	36.4	7.42	3.9e-13	41	43	38.3	8.39	6.3e-15	42	43	40.3	7.71	1.2e-13	38	39	37.1	9.92	9.1e-18	33	35	33.2	9.7	2.3e-17	37	38	34.7	8.9	7.3e-16	32	33	30.7	8.28	9.9e-15	36	38	34.5	8.27	1e-14	38	41	36.3	8.23	1.2e-14	41	42
[205]		WP_011090469.1	31	34	58.2	10.42	1.1e-18	33	36	64.4	9.94	8.3e-18	33	38	59.6	10.73	2.9e-19	35	41	58	8.6	2.5e-15	31	35	52.4	7.71	1.2e-13	33	37	61.7	8.63	2.3e-15	34	41	57.6	10.82	2e-19	35	41	58.2	11.3	2.5e-20	32	37	51.1	9.5	5.5e-17	33	36
[206]		WP_011089865.1	31	44	50.1	9.82	1.4e-17	31	48	49.6	9.23	1.7e-16	30	46	49	9.19	2.1e-16	33	46	49.5	9.65	2.9e-17	32	40	55.9	7.49	2.9e-13	34	52	49	9.48	5.9e-17	31	46	46.7	10.17	3.1e-18	34	50	50.1	9.69	2.4e-17	31	46	45.6	9.37	9.4e-17	30	40
[207]		WP_011086821.1	24	30	47.4	8.88	7.9e-16	27	35	43	9.97	7.5e-18	29	35	50.6	8.82	9.9e-16	27	33	41.3	9.16	2.4e-16	27	30	44.4	10.36	1.4e-18	32	40	49.8	8.6	2.6e-15	35	41	52	9.78	1.7e-17	36	42	59.8	9.15	2.4e-16	27	33	43.9	10.23	2.5e-18	31	36
[208]		WP_011089481.1	26	34	52.6	8.7	1.6e-15	31	44	50.3	13.07	1.4e-23	29	39	52.6	13.38	3.5e-24	30	42	52.3	9.05	3.8e-16	21	25	40.9	10.34	1.5e-18	24	31	46.2	9.69	2.5e-17	24	28	44.6	7.68	1.3e-13	20	26	40.9	11.68	5.1e-21	30	43	54.6	12.6	9.8e-23	29	40
[209]		WP_011086774.1	28	44	60.7	9.27	1.5e-16	26	38	59.6	9.95	8.1e-18	30	47	62.4	11.18	4.3e-20	32	47	67	10.12	3.9e-18	25	40	52.9	9.82	1.4e-17	31	45	67.4	10.98	1e-19	28	47	62.2	9.17	2.2e-16	30	50	53.6	10.63	4.5e-19	29	47	63.1	9.9	1e-17	27	42
[210]		WP_038965072.1	34	40	65.6	8.52	3.6e-15	33	38	57.1	7.21	9.5e-13	26	32	52.2	8.44	5.2e-15	31	40	59.6	7.68	1.3e-13	27	30	55.1	9.78	1.7e-17	35	41	67	9.44	7e-17	38	42	66.6	10.07	4.9e-18	38	45	69.3	10.12	3.8e-18	34	41	65.2	9.1	3e-16	34	38
[211]		WP_011088815.1	26	62	83.5	11.55	8.8e-21	25	49	80.6	10.3	1.8e-18	27	59	69	10.38	1.3e-18	24	52	71.1	9.64	3.1e-17	23	39	70.7	8.07	2.5e-14	29	57	83.5	9.35	1e-16	25	52	80.6	9.76	1.8e-17	25	55	75.2	10.93	1.2e-19	24	51	80.6	11.51	1e-20	22	42
[212]		WP_039183945.1	29	42	59.2	11.37	1.9e-20	22	28	53.5	8.37	6.9e-15	28	41	59.9	9.33	1.2e-16	22	33	53.8	9.05	3.8e-16	25	33	59.7	10.25	2.3e-18	28	40	60.9	9.42	7.8e-17	29	39	57.7	12.59	1e-22	30	47	59.9	12.36	2.8e-22	25	39	56	12.79	4.4e-23	31	45
[213]		WP_028175920.1	25	29	42.1	9.55	4.4e-17	28	32	33.3	10.39	1.2e-18	30	34	47.4	9.42	7.7e-17	29	33	36.8	8.2	1.4e-14	28	33	35.5	9.09	3.2e-16	33	39	43.1	9.08	3.3e-16	30	34	42.1	9.71	2.2e-17	31	37	36	8.52	3.5e-15	24	28	35.8	8.91	6.9e-16	28	32
[214]		WP_011083638.1	32	44	59.2	11.25	3.2e-20	29	40	55.7	8.72	1.5e-15	33	45	59.2	9.31	1.2e-16	30	39	54.6	9.81	1.4e-17	26	30	47.6	8.66	1.9e-15	30	38	55.3	9.59	3.8e-17	25	35	53.9	9.05	3.7e-16	29	35	55.7	9.13	2.6e-16	32	46	59.2	8.91	6.7e-16	28	37
[215]		WP_011085983.1	30	45	68.7	9.76	1.8e-17	28	38	70	9.94	8.5e-18	23	36	59.5	8.89	7.5e-16	23	31	57.4	9.7	2.3e-17	22	27	51.8	9.39	8.8e-17	26	35	67.7	9.16	2.3e-16	29	40	73.1	9.34	1.1e-16	23	36	52.8	9.07	3.5e-16	25	34	64.4	9.25	1.6e-16	26	37
[216]		WP_011085990.1	22	32	65.9	9.66	2.8e-17	20	27	53.9	9.06	3.6e-16	26	40	78.8	10.05	5.4e-18	22	32	59.8	10.71	3.1e-19	20	23	59.2	9.47	6.3e-17	20	28	69.8	11.15	4.8e-20	25	34	67.6	10.97	1e-19	24	37	76.8	9.97	7.6e-18	24	35	75.7	10.55	6.2e-19	28	42
[217]		WP_038967378.1	32	38	53.2	9.75	1.9e-17	24	30	46	9.19	2.1e-16	26	34	46.8	11.71	4.5e-21	26	32	47.9	11.29	2.7e-20	29	35	50.6	8.42	5.4e-15	31	41	56.8	9.37	9.6e-17	27	35	52.3	11.75	3.7e-21	31	42	56.4	9.25	1.6e-16	29	39	50.6	10.66	4e-19	26	32
[218]		WP_011086695.1	28	46	55.1	10.95	1.1e-19	24	35	46	9.73	2.1e-17	25	43	50.6	12.15	6.8e-22	21	35	49	10.2	2.8e-18	12	15	17.3	9.4	8.4e-17	21	29	60.1	11.37	1.9e-20	18	24	45.8	10.15	3.4e-18	22	33	44.4	10.6	5.1e-19	26	40	54.4	10.82	2e-19	27	37
[219]		WP_011085741.1	33	42	89.5	10.56	6.1e-19	23	26	65.8	9.61	3.4e-17	26	32	81.2	9.47	6.3e-17	20	27	75	8.88	7.6e-16	21	26	58.9	8.84	9.2e-16	27	34	85.9	9.37	9.4e-17	26	32	78.9	9.61	3.5e-17	29	36	85.9	10.11	4.2e-18	28	33	84.5	9.9	9.9e-18	25	30
[220]		WP_008547851.1	29	52	65	9.03	4e-16	23	43	52.7	9.2	2e-16	31	56	59.6	10.1	4.2e-18	28	45	57.9	9.54	4.7e-17	28	40	51.5	9.24	1.7e-16	30	49	55.3	9.19	2.1e-16	28	46	54.6	9.04	3.9e-16	31	55	57.9	9.69	2.5e-17	28	52	55.3	8.99	4.8e-16	29	54
[221]		WP_011086559.1	30	34	63.2	12.64	8.3e-23	25	28	46.1	12.68	7.1e-23	30	41	63.9	11.44	1.4e-20	27	30	55.8	7.26	7.9e-13	28	32	60.2	7.54	2.4e-13	25	30	58	11.35	2e-20	25	31	53.2	13.16	9e-24	30	36	59.1	11.71	4.5e-21	27	33	57.4	13.51	2.1e-24	29	33
[222]		WP_011088203.1	32	50	62	10.89	1.5e-19	33	56	68.6	11.55	8.7e-21	33	52	64.7	10.85	1.7e-19	34	49	68.6	11.26	3e-20	26	33	55.7	8.52	3.6e-15	33	48	62	10.83	1.9e-19	30	48	58.2	10.3	1.8e-18	32	46	56	11.06	7.2e-20	30	47	55.2	11.88	2.2e-21	29	45
[140-1, 222-1]	17	WP_011086636.1	11	13	24.6	7.6	1.8e-13	11	13	27.8	8.29	9.8e-15	12	14	27.5	6.15	8.9e-11	12	12	20.1	4.97	8.8e-10	9	10	18.4	5.35	2.6e-10	8	9	18.6	4.2	6.4e-08	6	6	14.6	7.87	5.8e-14	6	6	13.6	7.3	4.5e-13	12	13	29.8	8.07	2.5e-14	10	11
[222-2]	2	WP_011085773.1	3	3	7.9	3.67	3.1e-07	2	2	5.9	2.41	3.4e-06	2	2	4.2	3.19	1.5e-06	2	2	4.2	2.78	6.5e-06						1	1	2	2.75	3.6e-06	2	2	5.7	3.33	4.7e-07	2	2	4.2	2.87	5.6e-06	2	2	4.2	3.01	4.2e-06	1	1
[223]		WP_011089472.1	28	41	59.7	9.76	1.8e-17	29	37	67	10	6.5e-18	26	35	56.9	9.18	2.2e-16	31	37	70	10.56	5.9e-19	26	34	63.5	10.14	3.6e-18	27	33	66.1	10.14	3.5e-18	28	38	65.2	9.59	3.8e-17	29	39	64.2	10.27	2.1e-18	28	38	60.3	10.02	6e-18	28	35
[224]		WP_011083010.1	32	37	54.8	9.75	1.9e-17	35	40	57.8	9.86	1.2e-17	30	36	55.4	10.35	1.5e-18	27	31	45.4	9.07	3.4e-16	25	28	44.6	8.95	5.6e-16	34	40	51.2	8.36	7.2e-15	31	35	50.9	9.24	1.6e-16	32	37	50.4	9.63	3.1e-17	31	38	53.7	9.81	1.4e-17	29	32
[225]		WP_011090463.1	31	33	34.3	9.32	1.2e-16	29	34	30.8	8.75	1.4e-15	31	34	32.3	9.74	1.9e-17	29	30	30.5	10.84	1.9e-19	25	25	30.6	9.3	1.3e-16	26	27	32.2	9.56	4.3e-17	28	31	33.5	9.84	1.3e-17	28	32	30.2	11.23	3.4e-20	29	32	33.9	10.28	2e-18	31	32
[226]		WP_011083266.1	25	37	51.2	10.82	2e-19	19	25	43.2	11.29	2.7e-20	23	34	49.4	11.2	4e-20	22	28	48.3	8.81	1.1e-15	20	22	44.3	7.18	1.1e-12	24	30	55	8.34	7.9e-15	21	26	47	9.8	1.5e-17	22	27	47.2	10.22	2.6e-18	28	42	61.2	10.92	1.3e-19	26	38
[227]		WP_011083340.1	32	38	55.2	8.74	1.4e-15	32	40	59.3	8.58	2.8e-15	32	39	63.3	8.74	1.4e-15	28	33	44.8	8.83	9.7e-16	27	30	46.6	9.16	2.4e-16	31	37	50.7	9.57	4e-17	33	41	58	13.5	2.2e-24	34	42	61.3	9.18	2.2e-16	35	43	59.5	8.82	9.9e-16	30	37
[228]		WP_011085521.1	27	34	43.7	10.52	7.1e-19	22	31	36	10.78	2.3e-19	25	34	34.9	10.22	2.6e-18	25	31	37	11.19	4.1e-20	25	30	31.9	10.09	4.5e-18	28	34	38.9	11.25	3.2e-20	28	33	43.7	12.25	4.5e-22	30	38	45.2	9.44	7.3e-17	30	39	44.2	10.88	1.5e-19	22	27
[229]		WP_011085790.1	25	32	37.6	9.53	4.7e-17	21	30	34.2	8.94	6e-16	24	33	32.6	9.52	5e-17	27	33	41.7	9.57	4e-17	25	30	43.8	8.98	5.1e-16	31	39	54.7	9.74	2e-17	25	36	49	9.23	1.7e-16	26	36	38.9	9.84	1.3e-17	21	29	30.1	8.81	1e-15	23	28
[230]		WP_011087111.1	29	34	53.2	11.22	3.6e-20	26	32	60.2	7.64	1.6e-13	24	29	46.4	10.24	2.3e-18	24	29	39.6	9.45	6.7e-17	25	29	49.2	7.69	1.2e-13	34	43	67.3	10.05	5.2e-18	29	35	55.2	8.31	8.7e-15	31	39	58.4	9.66	2.8e-17	26	31	54.2	7.95	4.1e-14	28	33
[231]		WP_028172956.1	25	39	66	12.09	8.7e-22	20	29	47.6	9.63	3.1e-17	23	37	60.6	11.51	1e-20	22	31	50.9	10.08	4.6e-18	28	45	57.5	8.14	1.8e-14	24	41	52.8	9.07	3.5e-16	23	38	64.5	10.8	2.2e-19	27	41	71.8	10.82	2e-19	26	39	67.4	10.86	1.7e-19	24	36
[232]		WP_011083843.1	21	27	53.9	11.76	3.7e-21	23	31	44.9	10.91	1.4e-19	18	26	45.5	9.49	5.8e-17	25	31	52.5	11.99	1.3e-21	21	28	41.4	8.34	7.6e-15	29	37	57.1	11.38	1.8e-20	24	31	58.3	10.59	5.4e-19	24	32	48.4	11.68	5e-21	22	30	46.7	11.32	2.4e-20	25	32
[233]		WP_011084195.1	30	69	75.9	11.22	3.7e-20	28	46	75.1	8.51	3.8e-15	28	52	78.3	8.32	8.5e-15	27	44	75.1	12.29	3.7e-22	23	36	71.9	7.78	8.5e-14	27	41	75.1	11.45	1.4e-20	32	55	75.1	8.74	1.4e-15	33	48	77.1	12.49	1.6e-22	27	58	72.7	10.38	1.3e-18	27	57
[234]		WP_011085311.1	27	39	44.5	8.98	5.1e-16	26	33	49.5	9.58	3.9e-17	27	41	43.4	10.81	2.1e-19	24	30	47.2	11.09	6.3e-20	21	24	40.7	8.1	2.2e-14	29	42	53.7	9.47	6.3e-17	30	42	54.4	8.82	1e-15	28	40	44.1	9.16	2.4e-16	24	32	49.9	8.88	7.7e-16	28	34
[235]		WP_011083688.1	27	27	25.7	8.29	9.5e-15	36	38	34	8.79	1.1e-15	31	32	31.6	11.13	5.2e-20	34	36	30.9	7.34	5.5e-13	16	16	16.7	5.62	9.9e-11	21	22	19	6.75	6.8e-12	23	23	20.7	7.02	2.1e-12	28	28	27.7	9.64	3e-17	28	29	27.2	7.93	4.5e-14	29	29
[236]		WP_011083049.1	29	35	38.3	7.26	7.7e-13	31	38	37	9.33	1.1e-16	29	36	35.9	7.42	3.8e-13	31	35	38.9	10.12	3.9e-18	28	31	38.9	7.72	1.1e-13	31	32	44.6	10.5	7.9e-19	30	37	38.1	9.4	8.5e-17	33	41	40.5	9.29	1.4e-16	31	37	34.6	8.38	6.4e-15	27	32
[237]		WP_011083048.1	30	41	62.9	12.45	1.9e-22	23	33	62.4	12.02	1.2e-21	29	39	72.7	11.18	4.2e-20	25	33	70.8	9.73	2.1e-17	19	29	44.7	8.77	1.2e-15	24	35	56.2	10.19	2.9e-18	29	39	73	12.27	4.1e-22	24	34	68.4	11.91	1.9e-21	23	33	57.7	10.36	1.4e-18	19	23
[238]		WP_038965252.1	27	42	66.9	10.72	3.1e-19	27	38	64.4	11.47	1.2e-20	28	42	65.2	9.01	4.4e-16	28	36	65.9	10.22	2.5e-18	26	33	62.2	10.77	2.4e-19	27	40	64.7	10.85	1.7e-19	25	39	58.7	10.99	9.7e-20	29	43	62.2	7.88	5.5e-14	25	41	62.9	10.5	7.7e-19	24	34
[239]		WP_011087420.1	23	30	47.4	9.54	4.6e-17	20	26	37	9.21	1.9e-16	24	29	40.4	10.34	1.5e-18	28	36	46.7	7.92	4.7e-14	32	37	53	11.54	9.3e-21	29	36	46.4	10.73	2.9e-19	31	41	48.7	9.9	9.8e-18	28	36	51.3	10.72	3e-19	26	32	45.4	10.1	4.2e-18	23	30
[240]		WP_063921368.1	31	32	26.2	6.48	2.2e-11	32	36	29.5	7.74	9.8e-14	25	25	22.2	6.92	3.3e-12	26	27	24.1	6.21	6.7e-11	24	26	24.7	8.45	4.8e-15	35	38	33.8	8	3.3e-14	30	32	28.2	7.62	1.7e-13	35	36	27.9	8.29	9.7e-15	36	38	34.3	7.83	6.8e-14	27	29
[240-1]	28	WP_011088241.1	12	12	22.8	7.28	7.2e-13	17	18	31.7	6.15	8.8e-11	10	10	20.7	6.71	8.2e-12	10	10	22.2	7.24	8.5e-13	11	11	23.5	5.46	2.1e-10	12	12	26.1	6.94	3e-12	11	11	22.5	8.15	1.7e-14	12	12	25.5	5.98	5.9e-11	14	14	25.3	7.05	1.9e-12	14	14
[241]		WP_063921411.1	12	15	26.1	8.61	2.4e-15	28	34	51.1	11.62	6.6e-21	23	28	47.8	9.4	8.5e-17	24	26	43.8	8.33	8e-15	20	21	37.5	10.31	1.8e-18	22	25	42.6	8.41	5.7e-15	15	17	28.7	8.15	1.7e-14	19	21	37.1	9.65	2.9e-17	11	13	30	8.49	4.1e-15	10	12
[242]		WP_011087503.1	27	44	44	8.15	1.7e-14	30	50	42.9	8.74	1.4e-15	30	52	48.1	7.19	1e-12	27	37	42.5	8.24	1.2e-14	28	37	42.5	9.15	2.4e-16	32	43	51.3	8.85	9e-16	30	49	49.3	7.77	8.9e-14	30	45	48.5	8.06	2.5e-14	30	46	48.7	9.63	3.2e-17	31	42
[242-1]	1	WP_011088444.1	1	1	2.2	1.46	0.00018	1	1	2.2	3.51	6.3e-06	1	1	2.2	3.21	1.1e-05	1	1	2.2	2.84	1.4e-05	1	1	2.2	0.52	0.00044	1	1	2.2	2.13	3.7e-05	1	1	2.2	3.2	7.5e-06	2	2	5.3	3.18	9.5e-06	1	1	2.2	2.89	1.6e-05	1	1
[243]		WP_011089062.1	25	31	49.3	10.75	2.6e-19	28	33	52.9	9.88	1.1e-17	26	31	47.3	8.49	4e-15	25	30	54.2	10	6.5e-18	26	30	48.9	8.58	2.8e-15	25	28	44.6	9.82	1.4e-17	28	38	50.3	10.63	4.4e-19	24	29	44.6	9.56	4.3e-17	29	39	51.5	11	9.2e-20	23	31
[243-1]	24	WP_038967349.1	16	18	34.7	7.77	8.6e-14	12	14	30.9	7.9	5.1e-14	16	19	56.4	11.14	5.1e-20	14	16	38.8	7.15	1.2e-12	12	13	21.7	7.06	1.9e-12	14	17	39.2	8.7	1.7e-15	13	16	41	7.9	5.1e-14	15	19	51.2	9.29	1.4e-16	13	17	30.5	10.12	4e-18	14	16
[243-2]	1	WP_038966249.1						1	1	1.6	1.98	0.00045	1	1	5.5	-0.22	0.0011	1	1	1.6	2	0.00063	1	1	1.6	1.79	0.00019	1	1	1.6	1.57	0.00024	1	1	1.6	1.35	0.00062	1	1	1.6	1.36	0.0017	1	1	1.6	1.29	0.00069	1	1
[244]		WP_028173455.1	23	34	41.2	7.97	3.8e-14	24	34	42.4	8.84	9e-16	29	40	47.4	9.13	2.7e-16	26	36	45.3	8.07	2.4e-14	29	34	45.9	9.86	1.2e-17	27	34	43.8	9.49	5.7e-17	25	34	44	7.78	8.6e-14	30	42	49	8.43	5.2e-15	26	35	45.6	8.54	3.3e-15	25	35
[245]		WP_011087623.1	25	35	72.2	10.62	4.7e-19	21	26	51.8	9.17	2.2e-16	24	31	53.1	10.76	2.5e-19	22	26	52.3	8	3.3e-14	22	25	53.3	8.69	1.7e-15	26	33	64.1	9.68	2.6e-17	25	34	58.5	9.22	1.8e-16	25	32	58.5	8.83	9.7e-16	24	34	53.8	9.71	2.2e-17	24	28
[246]		WP_011085917.1	30	30	35.9	8.7	1.7e-15	33	36	36.7	7.75	9.4e-14	33	34	39.7	8.29	9.5e-15	29	30	29.8	7.33	5.8e-13	35	36	39.6	9.35	1.1e-16	36	37	43.3	7.72	1.1e-13	34	35	41.9	8.84	9e-16	30	30	35.8	7.45	3.4e-13	30	31	36.2	9.07	3.5e-16	30	30
[247]		WP_011083576.1	28	30	30.5	7.96	3.9e-14	37	44	39.1	8.16	1.7e-14	34	37	37.4	12.19	5.8e-22	35	37	38.1	6.38	3.4e-11	35	37	34.8	6.54	1.7e-11	34	36	29.5	6.6	1.3e-11	28	30	31	7.91	4.8e-14	33	39	33	6.92	3.3e-12	33	37	33.6	7.12	1.4e-12	30	32
[248]		WP_011085666.1	25	28	28.9	8.58	2.8e-15	35	37	31.6	7.89	5.3e-14	35	36	34.3	7.87	5.7e-14	30	31	31.5	7.81	7.6e-14	16	16	16.2	4.64	4.2e-09	19	19	19.3	7.48	3e-13	21	21	20.3	7.08	1.7e-12	21	22	23.2	7.84	6.5e-14	32	34	32.1	7.39	4.4e-13	28	31
[249]		WP_063921601.1	30	38	35	10.42	1.1e-18	31	36	38.1	9.09	3.2e-16	34	43	41.3	8.89	7.4e-16	29	36	31.8	10.01	6.2e-18	26	30	30.2	8.33	8.2e-15	27	31	33.3	8.76	1.3e-15	24	29	33	9.38	9.2e-17	30	40	38.1	9.15	2.4e-16	27	34	34.6	9.24	1.7e-16	31	37
[250]		WP_011083977.1	26	36	45	11.75	3.8e-21	24	35	33.2	11.89	2.1e-21	25	33	38.6	10.45	9.6e-19	24	36	29.7	8.63	2.2e-15	25	29	35.9	11.62	6.5e-21	28	37	38.8	9.63	3.1e-17	25	36	33.2	9.34	1.1e-16	25	36	41.6	11.36	2e-20	22	30	35.4	9.61	3.4e-17	29	40
[251]		WP_011083952.1	25	35	45.2	10.12	4e-18	23	31	46.8	11.38	1.8e-20	24	32	50.3	11.74	4e-21	28	31	47.3	10.56	5.9e-19	24	27	45.7	10.2	2.8e-18	27	34	55.4	9.48	5.9e-17	26	36	39.9	9.57	4.1e-17	27	36	46.6	10.96	1.1e-19	27	37	48.8	10.67	3.8e-19	24	30
[252]		WP_038965457.1	29	40	37.9	9	4.7e-16	30	40	42.8	8.14	1.8e-14	24	34	37.1	8.42	5.6e-15	28	41	40.7	8.72	1.5e-15	29	37	38	9.92	9.2e-18	29	42	39	8.78	1.2e-15	27	38	37.5	9.2	2e-16	29	39	39.9	9.17	2.3e-16	23	30	35.1	8.91	6.9e-16	25	38
[253]		WP_011088814.1	23	34	41.8	11.06	7e-20	24	35	33.6	11.02	8.4e-20	26	36	42.9	10.55	6.3e-19	27	39	55.8	11.19	4.1e-20	28	39	42.9	10.38	1.3e-18	23	36	33.1	10.02	6e-18	24	36	45.7	10.83	1.9e-19	29	45	48.6	10.39	1.2e-18	23	34	38	10.1	4.2e-18	25	35
[254]		WP_038967053.1	18	28	53.1	10.32	1.6e-18	18	27	47.9	12.34	3e-22	20	30	63.2	11.51	1.1e-20	21	32	55.8	9.48	5.9e-17	17	26	50.9	11.47	1.2e-20	26	38	58.3	11.08	6.5e-20	18	30	59.3	10.83	1.9e-19	22	33	59.8	12.42	2.2e-22	18	31	50.4	10.55	6.4e-19	18	27
[255]		WP_028173158.1	24	38	57.1	9.72	2.2e-17	20	30	49.1	9.17	2.3e-16	23	33	58.1	9.4	8.4e-17	21	29	54.6	8.15	1.7e-14	16	19	41.4	10.41	1.2e-18	21	29	51.6	9.81	1.5e-17	24	31	52.4	9.31	1.3e-16	23	36	49.9	9.18	2.2e-16	22	32	58.6	8.27	1e-14	26	38
[256]		WP_011088552.1	26	29	36.9	8.24	1.2e-14	29	34	37.9	9.26	1.5e-16	28	32	34.5	8.44	5.1e-15	28	32	36	8.4	5.9e-15	25	25	31.1	6.74	7e-12	29	34	33.2	7.35	5.3e-13	27	32	35.9	8.2	1.4e-14	32	37	39	8.35	7.5e-15	28	31	35.7	8.67	1.9e-15	30	35
[257]		WP_038965926.1	29	32	37.7	8.33	8.2e-15	27	30	34.3	7.29	6.9e-13	31	35	40.8	8.38	6.5e-15	32	38	40.9	9.24	1.7e-16	21	24	27.5	7.93	4.5e-14	29	34	44.3	9.36	1e-16	28	30	36.5	8.48	4.2e-15	31	36	37.5	7.97	3.8e-14	34	39	40	8.4	6e-15	36	43
[258]		WP_011086847.1	24	33	51.1	8.89	7.4e-16	26	41	53.3	8.98	5e-16	32	45	60	9.49	5.8e-17	24	31	41.9	7.29	6.8e-13	29	34	46.3	7.66	1.4e-13	28	36	49.9	8.75	1.4e-15	25	34	40.2	8.82	1e-15	25	30	48.1	8.63	2.3e-15	27	34	56.3	9.08	3.2e-16	27	38
[259]		WP_011085442.1	28	39	46.3	8.46	4.6e-15	24	35	38.7	8.44	5.1e-15	26	38	50	8.62	2.3e-15	27	36	45.3	8.83	9.7e-16	29	35	43.4	7.94	4.3e-14	30	41	56.2	8.65	2.1e-15	27	39	44.4	9.85	1.2e-17	26	37	44.1	9.42	7.7e-17	28	37	44.4	8.94	6e-16	29	38
[260]		WP_011088499.1	25	39	57.5	9.28	1.4e-16	20	32	54.4	9.53	4.9e-17	21	32	58.6	9.57	4.1e-17	20	26	56.6	9.04	3.8e-16	20	23	50	8.2	1.4e-14	23	30	55.5	9.2	1.9e-16	23	32	64.1	9.98	7.2e-18	24	34	55.5	9.82	1.4e-17	19	28	44.5	9.29	1.4e-16	22	33
[261]		WP_038965190.1	24	24	26.9	7.44	3.6e-13	33	34	37.7	6.66	1e-11	29	29	31.4	8.92	6.6e-16	34	35	33.8	8.71	1.6e-15	20	21	23	6.46	5.1e-12	32	33	32.6	8.23	1.2e-14	31	32	31.8	7.73	1e-13	36	37	37	9.15	2.5e-16	25	25	29.7	7.8	7.7e-14	22	22
[262]		WP_011087451.1	27	32	66.8	9.02	4.3e-16	26	32	57.8	11.59	7.4e-21	29	36	68.9	9.77	1.7e-17	24	30	60	10.35	1.4e-18	24	31	65.8	8.92	6.5e-16	28	35	76.3	10.35	1.5e-18	26	33	61.5	9.3	1.3e-16	30	35	64.9	10.18	3.1e-18	30	36	76	10	6.6e-18	23	27
[263]		WP_011084018.1	25	32	67	11.06	7e-20	20	23	55.5	11.08	6.5e-20	24	32	55	12.07	9.5e-22	14	18	41.6	10.43	1.1e-18	10	12	35.2	10.73	2.9e-19	23	30	59.2	11.18	4.2e-20	22	28	60.6	10.91	1.3e-19	25	29	67.7	10.55	6.2e-19	24	30	62.1	8.09	2.2e-14	18	20
[264]		WP_011083901.1	26	29	54.7	9.59	3.7e-17	24	26	49.1	8.66	2e-15	32	33	56.7	7.12	1.4e-12	26	30	52.8	9.36	1e-16	29	32	63.6	9.96	7.6e-18	30	34	56.7	9.93	8.7e-18	31	37	59.2	7.5	2.8e-13	30	36	53	9.45	6.8e-17	28	33	57.8	10.63	4.5e-19	25	28
[265]		WP_038967298.1	27	33	57.8	9.43	7.6e-17	24	30	53.8	8.22	1.3e-14	22	31	53.6	9.06	3.6e-16	25	27	49.7	7.91	4.9e-14	21	22	54	6.91	3.4e-12	24	27	55.4	9.2	2e-16	21	26	51.4	8.43	5.2e-15	21	26	48.6	9.81	1.5e-17	25	34	55.1	9.41	8.2e-17	24	30
[266]		WP_011085582.1	23	30	48.3	11.99	1.3e-21	23	30	51.4	12.79	4.4e-23	28	39	50.7	9.82	1.4e-17	25	33	46	10.9	1.4e-19	24	29	46	12.04	1.1e-21	25	34	44.8	12.87	3.2e-23	28	35	51.4	11.75	3.7e-21	24	36	49.3	7.92	4.5e-14	24	31	41	13.08	1.3e-23	25	30
[267]		WP_011089495.1	27	30	43.4	9.67	2.6e-17	18	22	26.3	8.21	1.3e-14	25	28	41.6	10.84	1.8e-19	24	25	32.6	8.13	1.9e-14	22	24	33.7	8.14	1.8e-14	25	26	38.6	8.71	1.6e-15	25	29	39.1	9.18	2.2e-16	32	37	44.4	12.18	5.9e-22	23	26	36.8	9.46	6.4e-17	21	23
[268]		WP_028171062.1	23	38	65.4	9.98	7.1e-18	21	32	59.1	9.66	2.8e-17	19	30	52.2	9.94	8.5e-18	22	33	64	9.15	2.5e-16	12	12	45.8	6.74	7.2e-12	20	27	61.3	8.14	1.8e-14	17	23	44.9	7.05	1.9e-12	19	25	54.4	9.08	3.2e-16	23	34	67.2	9.8	1.6e-17	26	39
[268-1]	1	WP_011090589.1	1	1	1.7	0.18	0.0005						1	1	1.7	0.16	0.0007	1	1	1.7	2.82	1.3e-08																					1	1	1.7	0.01	0.001
[269]		WP_011082920.1	25	37	60.2	9.3	1.3e-16	16	24	35.6	8.89	7.3e-16	26	31	55.9	8.75	1.3e-15	26	35	66.6	8.61	2.4e-15	21	27	49.8	8.34	7.8e-15	27	35	66.9	9.49	5.7e-17	23	32	62.6	9.32	1.2e-16	27	36	57.8	9.22	1.8e-16	22	32	62.6	8.93	6.1e-16	23	32
[270]		WP_028174732.1	28	39	66	12.59	1.1e-22	19	25	40.8	8.94	5.9e-16	27	37	61.5	13.72	8.4e-25	22	27	41	8.77	1.2e-15	16	19	43.8	8.01	3.1e-14	23	26	53.3	10.3	1.8e-18	21	26	51.5	12.19	5.6e-22	22	27	50.6	7.39	4.4e-13	23	31	53.5	9.08	3.3e-16	29	36
[271]		WP_011087773.1	29	29	30.4	10.07	4.9e-18	27	27	30	12.44	2e-22	28	30	25.7	10.86	1.6e-19	31	32	28.8	11.91	1.9e-21	31	34	33.6	9.79	1.6e-17	35	36	34.7	11.15	4.8e-20	33	35	37.5	10.53	6.9e-19	35	35	35.9	10.32	1.7e-18	24	24	25	11.03	8e-20	30	30
[272]		WP_011087063.1	22	35	57.1	8.61	2.5e-15	25	41	53.5	9.87	1.2e-17	26	43	63.5	10.28	2e-18	24	33	58.6	8.79	1.1e-15	25	33	57.7	8.59	2.7e-15	24	36	54.9	8.15	1.8e-14	26	39	56.6	10.88	1.6e-19	25	39	58.4	9.46	6.4e-17	22	45	56.6	9.45	6.9e-17	23	37
[272-1]	38	WP_038965449.1	27	28	32.7	9.2	2e-16	23	28	26	9.47	6.1e-17	27	29	30.5	10.39	1.2e-18	26	29	32.1	8.53	3.5e-15	17	17	19	7.58	2e-13	24	25	31.2	7.6	1.8e-13	22	24	26.7	7.76	9.3e-14	21	22	25.4	7.57	2e-13	27	30	31.4	9.37	9.5e-17	27	29
[273]		WP_011088659.1	21	36	63.8	11.14	5.1e-20	17	34	35	13.43	2.9e-24	24	39	70.1	12.57	1.2e-22	21	34	56	10.59	5.3e-19	23	35	57.5	11.1	5.9e-20	24	37	69.2	9.32	1.2e-16	24	41	61.7	12.08	9.3e-22	20	38	68.3	10.03	5.8e-18	23	42	69.2	11.97	1.5e-21	23	38
[274]		WP_038965353.1	22	29	49.7	10.1	4.2e-18	23	28	49.9	8.76	1.3e-15	21	26	55.9	8.59	2.7e-15	25	32	56.3	10.29	1.9e-18	22	27	41.7	9.63	3.1e-17	29	36	52.3	10.87	1.6e-19	23	29	52.5	8.34	7.7e-15	25	30	46.9	8.8	1.1e-15	24	30	51.4	8.53	3.5e-15	27	33
[275]		WP_038967267.1	22	28	47.3	8.92	6.5e-16	24	31	41.7	8.8	1.1e-15	26	35	38.7	9.26	1.5e-16	28	39	41.7	9.72	2.2e-17	18	22	30.7	7.51	2.7e-13	21	27	35.3	9.45	6.8e-17	23	32	39.4	9.79	1.6e-17	24	32	34.8	7.97	3.7e-14	17	25	32.3	7.84	6.5e-14	25	35
[276]		WP_011090333.1	23	31	66.9	8.08	2.3e-14	18	23	60.5	7.86	5.9e-14	19	25	69.6	8.21	1.3e-14	19	24	57.6	8.46	4.7e-15	19	24	63.7	8.93	6.2e-16	20	27	58.7	8.86	8.3e-16	19	25	57.1	8.41	5.8e-15	18	23	58.1	8.9	7e-16	18	25	52.8	8.96	5.5e-16	20	26
[277]		WP_011087245.1	26	40	73	10.1	4.2e-18	19	28	55.5	8.48	4.2e-15	24	36	70	10.46	9.3e-19	23	32	58.7	9.87	1.1e-17	20	28	60.7	10.24	2.3e-18	22	32	59.2	10.28	2e-18	23	35	74.5	10	6.5e-18	22	37	59.2	10.62	4.6e-19	20	34	58.1	10.17	3.2e-18	24	33
[278]		WP_011089399.1	25	34	41.5	10.23	2.4e-18	27	35	45.3	9.37	9.4e-17	29	38	51.4	8.75	1.3e-15	29	35	53.6	9.34	1.1e-16	23	25	39.1	9.13	2.6e-16	24	29	38	8.36	7.1e-15	28	35	50.3	9.28	1.4e-16	28	34	44.8	9.98	7.1e-18	31	38	53	9.22	1.8e-16	30	36
[279]		WP_038966065.1	21	27	33.9	12.29	3.7e-22	23	29	36.7	9.86	1.2e-17	29	37	42.5	11.89	2.1e-21	30	37	44.9	9.39	8.9e-17	26	28	37.2	9.75	1.9e-17	26	32	44.6	10.21	2.7e-18	25	33	35.4	11.23	3.5e-20	29	38	36.1	10.11	4e-18	20	27	37.1	8.59	2.7e-15	22	30
[280]		WP_011087562.1	21	34	41.5	10.48	8.5e-19	18	28	35.8	10.01	6.1e-18	24	33	47.3	10.43	1.1e-18	22	30	50.8	10.06	5.1e-18	22	28	47.5	8.69	1.7e-15	27	34	52.2	9.84	1.3e-17	22	34	42.6	9.77	1.8e-17	23	39	53.2	11.87	2.2e-21	19	26	33.5	8.28	9.9e-15	18	26
[281]		WP_038966432.1	21	23	43.5	10.52	7.2e-19	27	31	64	10.82	2e-19	23	26	55.3	8.48	4.2e-15	21	24	40.2	7.62	1.7e-13	16	17	37.6	7.52	1.9e-13	27	31	51.7	8.88	7.8e-16	25	28	56.2	12.02	1.2e-21	25	30	58.9	10.85	1.7e-19	28	35	63.2	10.88	1.5e-19	19	20
[282]		WP_011085395.1	26	35	82.7	11.96	1.5e-21	21	27	71	9.97	7.4e-18	21	26	72.4	7.85	6.3e-14	21	24	77.9	9.06	3.7e-16	20	23	70.6	10.12	4e-18	25	30	72.8	9.98	7.2e-18	21	27	75	10.44	1e-18	26	30	80.1	11.23	3.4e-20	22	31	70.6	11.09	6.3e-20	22	26
[283]		WP_011085901.1	24	30	51.3	9.51	5.4e-17	26	37	48.5	10.71	3.2e-19	28	37	51.5	10.61	4.8e-19	28	35	55.8	11.48	1.2e-20	21	22	39.4	10.99	9.5e-20	26	30	46.8	10.38	1.3e-18	22	28	53.4	10.46	9.1e-19	26	31	52	10.05	5.3e-18	28	36	53	10.72	3.1e-19	28	37
[284]		WP_011088134.1	27	42	60.6	11.45	1.4e-20	18	29	43.4	7.04	2e-12	27	48	52.5	7.99	3.4e-14	25	35	51.2	7.97	3.8e-14	21	27	58.6	11.23	3.4e-20	24	31	49.5	7.39	4.5e-13	21	34	47.1	9.95	8.2e-18	24	34	51.2	7.61	1.7e-13	24	42	60.6	11.2	3.9e-20	27	37
[285]		WP_011087551.1	28	44	60.9	10.37	1.4e-18	23	32	52.4	7.07	1.7e-12	27	42	55	8.46	4.6e-15	24	33	62.9	8.92	6.5e-16	25	29	53.5	7.94	4.2e-14	29	38	62.4	8.91	6.8e-16	26	36	52.6	9.1	3e-16	26	35	52.6	8.68	1.8e-15	26	43	50.3	8.79	1.1e-15	26	37
[286]		WP_011088959.1	26	31	37	8.79	1.2e-15	26	30	38.4	8.98	5.1e-16	28	38	37	10.2	2.7e-18	26	33	38.2	9.61	3.5e-17	19	22	28.8	8.83	9.4e-16	25	32	37.5	9.19	2e-16	24	28	35.1	7.67	1.3e-13	25	31	36.8	8.68	1.8e-15	32	38	44.2	9.86	1.2e-17	28	32
[287]		WP_038966542.1	26	33	57.7	8.4	5.9e-15	26	34	45.2	8.66	1.9e-15	27	34	51.1	8.77	1.3e-15	29	34	60.2	9.01	4.5e-16	15	17	34.3	6.5	2e-11	22	25	44.8	8.71	1.6e-15	23	28	47.5	8.41	5.7e-15	31	40	60.2	7.91	4.8e-14	30	36	51.9	7.84	6.5e-14	25	27
[288]		WP_011085788.1	26	34	35.8	8.65	2e-15	28	35	35.3	8.58	2.8e-15	23	29	37.6	9.59	3.8e-17	27	33	34.2	8.22	1.3e-14	24	29	30.3	7.89	5.4e-14	26	33	37.7	8.71	1.6e-15	26	31	37.4	8.36	7e-15	31	38	38.2	9.24	1.7e-16	24	30	35.3	8.02	3e-14	27	32
[289]		WP_011090225.1	26	30	56.1	7.84	6.5e-14	30	36	61.5	9.37	9.7e-17	26	29	53.7	7.31	6.1e-13	27	29	61.7	7.3	6.6e-13	19	20	43	7.99	3.5e-14	29	33	57	8.32	8.3e-15	28	31	63.3	7.2	1e-12	23	27	52.1	8.01	3.2e-14	25	28	55.4	7.22	9.1e-13	28	29
[290]		WP_011086815.1	25	47	46.9	8.27	1e-14	26	41	61.4	8.1	2.1e-14	23	43	56	8.9	7.1e-16	27	44	55.8	8.56	3.1e-15	22	39	47.4	8.04	2.8e-14	23	43	47.9	8.7	1.7e-15	25	48	47.4	8.74	1.4e-15	25	54	38.3	8.1	2.1e-14	20	44	48.4	8.75	1.3e-15	22	42
[291]		WP_011089243.1	26	36	46	9.44	7.2e-17	25	36	41.8	10.59	5.3e-19	25	34	48.9	9.39	9e-17	29	39	43	7.98	3.6e-14	21	27	35.7	9.5	5.5e-17	29	39	43.5	8.25	1.2e-14	25	32	43	9.67	2.7e-17	28	41	41.6	9.46	6.6e-17	21	30	40.8	10.98	1e-19	27	40
[292]		WP_011086521.1	23	40	61	12.1	8.4e-22	21	33	60.3	7.85	6.2e-14	22	35	46.2	16.15	2.7e-29	25	33	68.3	13.74	7.7e-25	23	30	53.4	11.65	5.7e-21	24	40	61.4	13.51	2.1e-24	26	43	68.3	13.86	4.5e-25	25	39	68.3	13.25	6.1e-24	25	41	65.9	15.93	6.8e-29	24	32
[293]		WP_011085820.1	28	37	71.8	10.4	1.2e-18	23	32	62.2	7.9	5e-14	26	38	69.9	7.84	6.6e-14	22	28	56.8	7.75	9.6e-14	19	20	55.2	6.85	4.4e-12	29	37	69.9	9.52	5.1e-17	23	34	62.2	8.78	1.2e-15	23	29	62.5	7.63	1.6e-13	24	34	59.5	9.24	1.6e-16	23	27
[294]		WP_011088878.1	21	38	63.6	8.51	3.7e-15	21	35	65.1	9.12	2.8e-16	25	41	68.2	9.03	4.1e-16	22	40	60.2	9.04	3.8e-16	20	32	52.5	8.61	2.5e-15	26	49	68.2	8.59	2.6e-15	24	45	68.2	9.51	5.3e-17	20	36	61.7	10.48	8.3e-19	23	41	68.2	8.53	3.4e-15	22	38
[295]		WP_011084074.1	23	29	63.8	10.22	2.6e-18	27	31	53.8	9.55	4.5e-17	27	35	63.8	10.31	1.7e-18	25	30	61.9	9.46	6.4e-17	20	24	36.4	8.68	1.8e-15	25	29	53.6	8.49	4.1e-15	25	33	54.3	10.27	2.1e-18	27	33	61.3	10.05	5.2e-18	26	33	63.8	10.11	4e-18	24	29
[296]		WP_011085758.1	26	33	50.3	11.75	3.8e-21	23	33	38.1	12.46	1.8e-22	26	35	49.3	12.75	5.2e-23	25	32	51.9	11.22	3.6e-20	23	27	45	10.35	1.5e-18	26	31	48.1	10.74	2.8e-19	26	34	42.8	12.14	7.2e-22	27	35	43.8	14.44	4e-26	23	31	45.6	13.25	6.3e-24	24	30
[297]		WP_011087606.1	25	31	47.2	9.25	1.6e-16	25	30	50.1	9.31	1.2e-16	22	30	42.3	9.39	8.7e-17	24	28	48	9.24	1.7e-16	23	26	45.9	9.3	1.3e-16	27	33	46.9	9.8	1.6e-17	26	32	51.4	9.73	2.1e-17	25	29	47.2	9.42	7.6e-17	27	35	51.8	10.28	1.9e-18	25	32
[298]		WP_011086590.1	25	35	60.3	12.49	1.6e-22	22	29	52.1	11.89	2.1e-21	23	33	60.8	11.84	2.6e-21	24	30	54.6	7.82	7.2e-14	18	21	57.1	9.43	7.5e-17	26	33	57.9	11.34	2.1e-20	22	29	51.1	9.64	3.1e-17	24	34	57.9	11.54	9.1e-21	23	33	52.1	11.46	1.3e-20	26	36
[299]		WP_011090838.1	26	29	54.6	9.02	4.4e-16	23	27	42.7	9.61	3.5e-17	25	29	46.3	9.18	2.1e-16	20	23	38.3	9.24	1.7e-16	23	23	40.3	8.05	2.6e-14	26	29	47.6	8.45	4.9e-15	25	28	51.4	8.93	6.4e-16	29	32	58.6	8.67	1.9e-15	25	29	50.6	9.74	1.9e-17	22	24
[300]		WP_011090327.1	23	38	68	11.66	5.5e-21	19	24	52.8	10.62	4.6e-19	24	33	57.8	11.59	7.5e-21	21	27	55.4	10.29	1.9e-18	18	23	57.8	9.51	5.4e-17	22	30	59.1	10.9	1.4e-19	25	33	62.7	11.08	6.6e-20	24	37	71	11.49	1.1e-20	19	32	60.4	11.27	2.9e-20	23	35
[300-1]	1	WP_011087156.1	2	2	12.3	7.63	1.6e-13						3	4	12.9	11.59	7.5e-21	1	1	7.9	0.4	6.6e-05	2	2	12.9	4.67	3.7e-11	1	2	7.3	8.85	6.6e-18	1	1	7.3	7.33	5.8e-13	2	3	12.3	11.49	1.1e-20	2	3	7.9	9.54	4.6e-17	1	2
[301]		WP_011087262.1	25	38	42.1	9.66	2.8e-17	24	37	44.5	9.75	1.9e-17	25	38	46.1	9.58	4e-17	27	38	47.6	10.1	4.2e-18	27	38	54.4	10.23	2.5e-18	28	35	53.9	8.87	7.9e-16	27	38	53.9	9.93	8.9e-18	28	39	45	10.09	4.4e-18	23	33	45.8	10.05	5.2e-18	25	35
[302]		WP_011088410.1	24	44	72.8	10.62	4.7e-19	18	27	49.3	10.21	2.6e-18	22	37	60.4	10.68	3.5e-19	22	33	72.8	7.73	1e-13	22	26	69.4	9.72	2.1e-17	26	38	74.6	10.39	1.2e-18	25	37	74.3	11.48	1.2e-20	23	37	60.4	10.53	6.8e-19	24	41	74.3	10.62	4.7e-19	22	40
[303]		WP_038965168.1	20	22	45.8	8.65	2.1e-15	18	19	53.4	10.34	1.5e-18	23	26	59.2	9	4.6e-16	18	18	55.7	7.87	5.8e-14	8	8	26.2	9.38	9.1e-17	10	10	24.4	9.95	7.9e-18	11	11	28	7.42	3.9e-13	12	12	32.7	8.53	3.4e-15	24	29	56.4	10.49	8e-19	24	26
[304]		WP_011087103.1	22	26	45.1	8.14	1.9e-14	20	24	50.1	8.14	1.8e-14	20	24	47.7	9.61	3.4e-17	21	22	57.8	7.8	7.9e-14	21	24	50.6	8.46	4.6e-15	23	28	58.3	8.26	1.1e-14	27	32	54.9	9.32	1.2e-16	25	30	58.3	9.4	8.6e-17	21	24	47.5	9.69	2.4e-17	20	24
[305]		WP_011087573.1	26	41	50.1	12.15	6.9e-22	23	33	40	12.65	8.2e-23	25	40	48.6	7.16	1.2e-12	24	28	42.7	10.4	1.2e-18	17	21	31.5	8.56	3e-15	23	28	47.7	8.78	1.2e-15	22	27	44.2	8.7	1.7e-15	25	32	47.9	9.18	2.1e-16	24	35	44	8.74	1.4e-15	20	25
[306]		WP_038966145.1	20	22	53.4	9.86	1.2e-17	29	32	62	11.59	7.4e-21	20	25	54.2	11.18	4.2e-20	20	23	55.7	9.55	4.5e-17	21	22	59.7	11.42	1.5e-20	22	26	57.7	10.21	2.7e-18	19	21	58.2	10.22	2.6e-18	19	22	52.7	10.25	2.2e-18	21	26	56.7	11.61	6.8e-21	25	28
[307]		WP_011088436.1	26	36	59.3	10.03	5.7e-18	23	28	46.9	8.21	1.4e-14	27	35	60.5	9.4	8.5e-17	23	29	50.3	8.54	3.4e-15	24	28	54.7	9.48	6.1e-17	27	35	59.8	8.84	9.1e-16	26	35	55.6	8.85	8.8e-16	24	30	55.6	8.85	8.7e-16	21	28	49.7	8.47	4.5e-15	26	32
[308]		WP_011083169.1	23	41	89.1	11.28	2.8e-20	14	22	57.5	8.13	1.9e-14	19	31	88.7	9.81	1.5e-17	16	23	64.7	8.12	2e-14	9	9	38	8.7	1.7e-15	12	14	56.4	7.43	3.7e-13	11	14	45.1	8.62	2.3e-15	14	18	56.4	8.36	7.1e-15	18	32	81.6	10.88	1.5e-19	19	29
[309]		WP_038965254.1	20	27	48.4	10.41	1.1e-18	19	24	43.3	10.33	1.6e-18	24	31	53.7	11.21	3.8e-20	16	22	48.4	10.05	5.3e-18	16	20	35.9	9.22	1.8e-16	17	23	40	9.16	2.3e-16	22	30	54.2	10.92	1.3e-19	20	27	44.3	9.78	1.7e-17	18	23	44.6	10.03	5.7e-18	21	25
[310]		WP_011084135.1	23	64	93.2	9.87	1.1e-17	22	47	85.1	9.76	1.8e-17	23	51	80.1	10.69	3.5e-19	23	41	76.4	9.49	5.7e-17	24	35	85.1	8.09	2.3e-14	25	48	89.4	8.79	1.1e-15	24	54	93.2	9.49	5.7e-17	24	47	85.1	9.88	1.1e-17	26	71	93.2	9.51	5.2e-17	25	62
[311]		WP_028173221.1	22	32	47.9	9.38	9.1e-17	18	24	50	9.08	3.3e-16	24	38	51.7	10.06	5.1e-18	23	34	50.4	8.37	6.8e-15	21	31	45.3	8.99	4.8e-16	21	31	41.7	9.02	4.3e-16	23	40	51.1	9.3	1.3e-16	25	40	51.1	10.28	2e-18	20	32	53.4	9.24	1.7e-16	19	30
[312]		WP_011085273.1	24	37	34.8	11.53	9.8e-21	16	24	26.9	10.09	4.5e-18	22	35	31.4	9.49	5.7e-17	21	33	31.4	8.39	6.1e-15	23	30	27.8	10.89	1.5e-19	24	37	31.1	10.45	9.7e-19	22	32	35.5	11.82	2.8e-21	19	32	34.8	11.19	4e-20	21	30	31	10.33	1.6e-18	22	31
[313]		WP_011088421.1	18	46	49.7	10.21	2.6e-18	18	29	55.4	10.76	2.6e-19	21	46	56.7	11.02	8.5e-20	24	44	58.6	10.45	9.6e-19	19	27	42.2	9.42	7.6e-17	21	32	52.4	10.87	1.6e-19	21	41	55.4	9.63	3.2e-17	20	37	57.3	10.3	1.8e-18	18	36	39.8	10.79	2.2e-19	21	39
[314]		WP_038965154.1	24	27	30.1	8.12	1.9e-14	26	30	29.5	8.85	8.9e-16	24	28	27.1	8.42	5.5e-15	29	31	33.6	9.66	2.8e-17	28	30	33	8.89	7.6e-16	30	33	36.9	8.94	6.1e-16	32	36	38.2	8.1	2.1e-14	28	33	33.5	9.7	2.3e-17	26	31	32.7	9.07	3.5e-16	25	28
[315]		WP_028171586.1	24	31	66.5	9.04	4e-16	22	25	55	9.25	1.6e-16	26	29	67.9	9.53	4.9e-17	23	27	52	8.58	2.7e-15	22	24	67.9	7.75	9.6e-14	23	29	62.6	8.64	2.2e-15	23	28	55.4	10.15	3.5e-18	20	27	50.6	9.51	5.3e-17	21	24	55.9	9.2	2e-16	21	23
[316]		WP_011083841.1	25	33	60.9	10.68	3.5e-19	28	39	70	7.77	8.8e-14	27	37	67.1	9.5	5.4e-17	27	33	62.9	8.84	9.1e-16	15	16	53.2	8.91	6.7e-16	27	33	65.6	8.6	2.5e-15	27	35	69.6	11.85	2.4e-21	21	27	60.1	8.02	3e-14	27	37	62.9	9.47	6.3e-17	27	35
[317]		WP_011083634.1	23	27	59.2	8.98	5.2e-16	25	30	69.7	10.51	7.4e-19	22	27	59.9	11.49	1.1e-20	19	21	60.2	9.05	3.8e-16	20	24	56.9	8.14	1.8e-14	23	27	57.2	9.11	2.9e-16	26	31	64.8	10.66	3.9e-19	25	28	65.5	10.02	6e-18	20	24	61.8	8.93	6.2e-16	25	30
[318]		WP_038966438.1	27	33	42.9	8.85	8.7e-16	27	32	48	9.59	3.8e-17	25	28	36.6	9.63	3.1e-17	32	40	43.1	9.56	4.2e-17	22	25	32.9	8.14	1.8e-14	29	33	45.9	9.24	1.6e-16	24	33	38.6	9.11	2.9e-16	28	34	44.9	9.76	1.8e-17	25	31	39.2	8.64	2.2e-15	28	33
[319]		WP_028174555.1	17	21	30.7	12.37	2.7e-22	20	24	42	14.8	8.6e-27	24	35	51.1	12.24	4.6e-22	19	22	33.8	8.21	1.3e-14	13	14	22.1	9.64	3e-17	17	20	38.4	12.26	4.3e-22	14	15	33.8	11.26	3.1e-20	16	18	36.6	11.54	9.3e-21	21	30	48.6	11.28	2.7e-20	23	29
[320]		WP_011088981.1	21	27	41.7	9.43	7.4e-17	28	34	51.1	9.3	1.3e-16	29	36	55.8	8.59	2.6e-15	23	27	45.3	7.62	1.7e-13	21	24	45.7	8.07	2.4e-14	22	25	43.3	8.04	2.8e-14	28	33	49.1	8.65	2e-15	24	30	44.6	8.74	1.4e-15	26	31	53.4	9.41	8.2e-17	23	32
[321]		WP_011086737.1	21	28	51.8	10.92	1.3e-19	22	25	43.3	9.17	2.2e-16	19	26	60.3	14.08	1.8e-25	18	21	59	12.43	2.1e-22	16	19	50.8	6.97	2.7e-12	24	36	64.3	12.19	5.8e-22	26	34	71.5	12.42	2.2e-22	20	27	52.8	10.03	5.7e-18	24	32	61.6	10.96	1.1e-19	21	25
[321-1]	13	WP_011086235.1	12	14	48.6	8.26	1.1e-14	8	9	30.4	7.29	6.7e-13	10	11	38.5	7.76	9.1e-14	5	5	23	6.78	6.1e-12	8	9	28.4	5.56	5.9e-10	8	8	32.7	6.67	9.8e-12	7	8	26.1	6.12	9.8e-11	10	11	42.4	6.16	8.3e-11	8	9	38.9	6.75	6.7e-12	7	8
[322]		WP_011088161.1	22	58	75.6	9.92	9.2e-18	16	25	75.6	8.89	7.5e-16	16	30	75.6	9.02	4.3e-16	17	24	75.6	9.4	8.5e-17	13	17	68.6	9.21	1.9e-16	17	28	75.6	9.51	5.3e-17	18	33	75.6	10.93	1.3e-19	16	28	75	11.75	3.7e-21	18	33	75.6	11.14	5.1e-20	18	30
[323]		WP_011089336.1	25	34	43.8	8.84	9.3e-16	19	26	39.6	9.45	6.7e-17	18	25	39.1	8.82	1e-15	11	12	29.6	8.52	3.6e-15	17	19	36.1	8.81	1e-15	24	29	43.6	9.44	7.1e-17	18	26	35.6	9.27	1.4e-16	13	19	33.3	8.66	2e-15	22	31	42.6	9.71	2.2e-17	23	33
[324]		WP_008139488.1	17	44	66	12.56	1.2e-22	13	22	44	11.66	5.6e-21	18	35	66	13.1	1.2e-23	12	23	63	8.34	7.8e-15	13	21	51	9.27	1.5e-16	15	27	66	14.43	4e-26	15	35	66	10.94	1.2e-19	18	36	66	12.18	6.1e-22	14	23	44	11.87	2.3e-21	12	20
[325]		WP_011083651.1	22	35	53.8	8.86	8.6e-16	20	37	48.9	8.24	1.2e-14	25	40	58.3	9.17	2.3e-16	20	25	53.2	8.34	7.9e-15	16	20	47.3	8.97	5.2e-16	19	22	47.8	8.35	7.3e-15	18	29	52.4	9.63	3.2e-17	21	30	49.2	8.51	3.7e-15	21	29	61.6	10.9	1.4e-19	20	27
[326]		WP_011083038.1	28	35	51.8	10.15	3.4e-18	19	21	39.2	8.15	1.7e-14	23	25	44.8	9.63	3.1e-17	18	19	39.2	9.13	2.6e-16	21	22	43.8	8.9	7.2e-16	22	24	41.9	9.92	9.3e-18	25	28	47.9	9.9	9.9e-18	23	25	42.9	9.23	1.8e-16	24	28	49.6	9.43	7.4e-17	19	22
[327]		WP_011090230.1	27	31	67.4	8.9	7.2e-16	22	24	52.7	9.63	3.1e-17	24	28	62.1	10.18	3e-18	24	26	52.2	9.34	1.1e-16	20	23	53.4	7.94	4.2e-14	23	26	56.2	9.18	2.2e-16	21	26	50.6	9.03	4.1e-16	24	29	62.1	8.94	6e-16	25	28	61.4	9.31	1.2e-16	24	28
[328]		WP_038967450.1	18	20	42.8	7.85	6.3e-14	16	22	42.1	10.67	3.8e-19	23	28	51.3	10.88	1.5e-19	13	14	28.2	7.32	5.9e-13	3	3	10.3	4.59	3.5e-09	3	3	10.3	3.27	1.4e-08	1	1	2.6	1.86	9.7e-06	2	2	7.9	2.75	1.1e-07	21	27	41.8	9.46	6.5e-17	17	19
[329]		WP_028175493.1	24	44	71	12.13	7.5e-22	18	35	54.8	12.07	9.5e-22	21	41	64.7	11.65	5.8e-21	20	30	57	8.79	1.1e-15	20	34	59.7	8.91	6.9e-16	22	35	68.3	10.62	4.7e-19	20	36	56.1	10.84	1.8e-19	22	37	75.1	10.12	3.9e-18	18	35	55.7	10.95	1.1e-19	17	28
[330]		WP_011084214.1	23	30	63	12.33	3.2e-22	20	26	57	10	6.6e-18	21	27	52.6	9.21	1.9e-16	21	26	51.8	11.53	9.5e-21	22	26	47.1	12.65	8.2e-23	22	31	56.2	9.65	2.9e-17	22	28	63.8	8.66	1.9e-15	19	25	46.8	11.59	7.6e-21	23	29	50.7	12.65	8.2e-23	23	30
[331]		WP_074077674.1	24	29	54	10.05	5.2e-18	25	32	53.1	8.89	7.3e-16	25	31	50.9	9.43	7.5e-17	23	27	43.3	9.18	2.2e-16	13	14	26.4	8.9	7e-16	20	23	39.5	7.47	3.1e-13	18	20	40.7	8.87	8.2e-16	18	21	41.3	9.65	2.9e-17	25	31	55.3	9.52	5e-17	26	31
[332]		WP_038967356.1	22	43	65.7	8.87	8.2e-16	19	35	51	8.66	2e-15	28	41	74.1	10.58	5.5e-19	25	30	70.3	9.85	1.2e-17	22	27	61.2	9.57	4.1e-17	26	38	62.6	9.71	2.2e-17	22	35	69.2	9.33	1.1e-16	20	34	59.4	9.34	1.1e-16	23	40	62.2	8.72	1.6e-15	26	40
[333]		WP_038965179.1	21	25	55.1	10.98	1e-19	24	27	52.5	11.02	8.3e-20	20	23	59.6	8.52	3.6e-15	15	16	41.4	7.55	2.3e-13	15	17	44.4	8.92	6.6e-16	18	22	47.5	10.33	1.6e-18	17	18	46.2	8.68	1.8e-15	22	26	56.6	11.62	6.4e-21	25	31	63.2	10.84	1.8e-19	19	22
[334]		WP_011090572.1	22	27	54.3	10.84	1.8e-19	18	21	50.9	9.45	7e-17	16	21	55.1	9.47	6.2e-17	13	15	39.4	9.27	1.5e-16	9	10	34.7	7.04	2e-12	15	16	40.7	10.67	3.7e-19	14	15	36.8	9.6	3.6e-17	14	16	41.3	9.41	8.2e-17	16	20	58	9.47	6.3e-17	22	25
[335]		WP_011088163.1	25	58	70.9	9.92	9.3e-18	20	31	66.1	7.89	5.2e-14	27	42	68.7	9.55	4.4e-17	21	30	64.8	7.88	5.4e-14	17	26	51.3	7.39	4.5e-13	26	41	64.8	7.75	9.4e-14	22	44	66.1	7.59	1.9e-13	23	38	61.7	9.59	3.8e-17	24	45	67.4	9.52	5e-17	24	37
[336]		WP_011083558.1	26	31	56.8	9.7	2.3e-17	20	24	45.9	9.89	1e-17	24	30	61.6	9.45	6.8e-17	21	25	53.2	8.98	5e-16	21	24	51.4	8.51	3.8e-15	17	21	49.1	9.25	1.6e-16	22	26	51.4	9.78	1.7e-17	26	32	55.3	9.72	2.2e-17	20	26	48.2	9.06	3.7e-16	26	30
[337]		WP_038966355.1	19	95	48.3	11.15	4.8e-20	18	78	39.1	10.42	1.1e-18	22	114	54.3	10.94	1.2e-19	19	114	40.2	11.03	8e-20	18	63	39.1	9.47	6.3e-17	19	103	46.8	12.2	5.5e-22	19	106	46.8	10.83	1.9e-19	21	126	53.2	11.4	1.7e-20	20	118	53.2	9.71	2.2e-17	21	119
[337-1]	19	WP_133415033.1	19	44	39.3	10.35	1.4e-18	16	47	30.9	9.38	9.1e-17	20	47	40	10.22	2.5e-18	17	40	26	11.08	6.5e-20	17	44	38.9	10.65	4e-19	20	76	39.3	9.88	1.1e-17	21	75	45.7	10.54	6.5e-19	19	63	31.5	10.7	3.3e-19	19	53	31.5	10.22	2.6e-18	17	56
[337-2]	13	WP_011087746.1	14	16	28.8	10.78	2.4e-19	12	22	17.2	8.39	6.1e-15	12	19	21.6	7.87	5.7e-14	13	29	21.6	8.6	2.5e-15	12	24	21.6	9.82	1.4e-17	15	35	27.4	10.14	3.6e-18	15	30	25.5	10.54	6.5e-19	11	22	17.4	9.9	9.9e-18	13	28	21.6	9.65	2.9e-17	13	30
[338]		WP_011085984.1	23	37	54.2	13.9	3.9e-25	16	22	38.9	11.09	6.2e-20	20	29	44.9	13.16	9.1e-24	19	24	37.7	11.65	5.7e-21	9	11	29.3	10.72	3e-19	15	18	31.5	7.42	3.9e-13	16	21	38.9	10.98	1e-19	20	25	44.9	11.55	8.9e-21	20	29	45.2	13.74	7.9e-25	21	25
[339]		WP_011083644.1	22	25	51	7.57	2.1e-13	20	24	45	6.93	3.2e-12	23	28	54.8	8.13	1.9e-14	22	25	44.8	7.85	6.3e-14	21	24	41.8	8.13	1.9e-14	28	32	61.7	7.74	9.8e-14	27	30	57.1	7.52	2.6e-13	26	31	61	8.59	2.6e-15	24	26	52.7	7.97	3.7e-14	23	26
[340]		WP_011083667.1	24	34	57.7	12.66	7.6e-23	11	14	30.9	7.82	7.2e-14	16	22	37	11.65	5.7e-21	14	18	31.2	9.04	3.9e-16	13	16	29.3	6.06	1.3e-10	20	24	54.9	7.89	5.3e-14	15	21	40.7	10.06	5e-18	19	31	51.2	11.35	2.1e-20	15	22	37	11.29	2.6e-20	15	21
[341]		WP_011087591.1	23	31	59.4	9.23	1.7e-16	20	28	50.4	9.63	3.2e-17	21	28	47.7	9.67	2.7e-17	18	22	43.5	9.35	1e-16	17	19	34.5	9.81	1.4e-17	21	25	68.4	9.81	1.5e-17	20	26	56	9.25	1.6e-16	21	26	49.6	8.49	4.1e-15	22	29	61.8	9.89	1e-17	22	27
[342]		WP_011090137.1	20	32	46.9	9.76	1.8e-17	19	28	47.7	7.42	3.8e-13	23	33	53.1	9.02	4.3e-16	21	25	44.4	7.96	3.8e-14	17	24	39.5	7.4	4.3e-13	24	32	49.7	10.23	2.4e-18	21	28	47.4	8.8	1.1e-15	21	32	45.6	8.14	1.9e-14	17	24	36.2	9.98	7.1e-18	23	32
[343]		WP_063921416.1	25	27	38.4	6.77	6.3e-12	13	15	22.6	7.37	4.8e-13	20	22	30.9	5.97	1.9e-10	21	22	34.4	9.43	7.5e-17	16	16	24.2	7.19	1e-12	17	17	28.7	6.72	7.7e-12	23	27	38.7	9.17	2.2e-16	27	32	39.9	7.28	7e-13	20	23	31.4	9.66	2.7e-17	15	16
[343-1]	32	WP_039186345.1	20	23	32.5	9.1	3.1e-16	18	22	29.4	8.36	7.2e-15	18	21	27.9	9.15	2.5e-16	27	30	38.3	8.99	4.8e-16	15	15	27	4.63	5.7e-10	14	15	21.9	7.51	2.7e-13	14	14	23	7.83	6.9e-14	25	30	36	9.66	2.8e-17	19	22	29.2	11.7	4.5e-21	15	16
[343-2]	26	WP_011087100.1	14	19	33	7.47	3.2e-13	15	19	29.8	7.89	5.3e-14	16	20	32.1	8.45	4.8e-15	18	22	31.2	8.66	2e-15	10	10	22.2	8.32	8.5e-15	12	13	26.1	8.52	3.5e-15	14	16	26.8	7.85	6.3e-14	21	27	33.7	8.83	9.7e-16	16	21	38.5	8.67	1.9e-15	16	18
[343-3]	27	WP_063921594.1	17	19	30.9	7.91	4.9e-14	13	16	21.5	8.06	2.6e-14	16	18	27	8.92	6.4e-16	21	22	37.4	9.04	3.8e-16	8	8	13.8	3.52	6.6e-08	11	11	24.3	7.51	2.7e-13	10	10	19.1	7.15	1.3e-12	17	21	32.3	9.36	1e-16	15	17	23.1	8.03	2.8e-14	11	12
[343-4]	23	WP_011086969.1	15	16	28.1	10.77	2.4e-19	13	14	24.2	7.14	1.3e-12	14	14	25.1	6.84	4.7e-12	13	14	23.7	9.99	6.9e-18	8	8	13.4	5.7	1.1e-10	7	7	11.8	5.87	2.9e-10	12	12	20.3	5.8	4e-10	13	15	21.9	9.55	4.5e-17	13	15	25.4	8.54	3.3e-15	9	9
[343-5]	20	WP_063921417.1	11	12	19	7.41	4e-13	10	11	19.1	5.86	1.9e-10	8	9	14.3	5.89	2.6e-10	19	19	34.7	8.31	8.8e-15	5	5	8.1	3.41	2.1e-07	4	4	6.9	6.45	1.3e-11	8	9	17.5	6.35	3.4e-11	16	18	29	6.12	1e-10	7	8	11.5	7.84	6.6e-14	4	4
[343-6]	21	WP_038965915.1	13	14	23.5	7.44	3.7e-13	10	11	21	5.92	1.9e-10	10	11	16.2	7.18	1.1e-12	17	18	27.6	7.92	4.7e-14	13	13	27	5.9	2.2e-11	9	9	16	5.9	2.6e-10	12	12	23.5	6.09	1.1e-10	17	21	32.6	6.65	1e-11	10	11	16.7	7.5	2.8e-13	7	7
[343-7]	20	WP_063921459.1	11	15	22.3	7.47	3.2e-13	12	16	23.2	7.89	5.3e-14	12	16	22.7	8.45	4.8e-15	17	21	28.7	8.66	2e-15	9	9	17.9	7.22	9.2e-13	12	13	23.2	8.52	3.5e-15	10	12	19.3	7.85	6.3e-14	16	22	28	8.83	9.7e-16	10	14	22.2	8.48	4.2e-15	13	15
[343-8]	19	WP_011082928.1	10	12	18.7	6.57	1.5e-11	11	13	21.6	7.61	1.7e-13	8	9	14.5	7.94	4.2e-14	18	18	35.3	8.94	6e-16	8	8	15.2	4.39	1.6e-09	9	9	15.9	6.34	2.1e-11	11	11	19.5	6.88	3.9e-12	14	17	21.9	8.07	2.4e-14	11	12	20.5	8.09	2.2e-14	8	8
[343-9]	20	WP_011085715.1	8	10	18.5	7.82	7.1e-14	6	8	15.3	8.68	1.8e-15	7	8	16	8.11	2.1e-14	14	16	30.7	8.91	6.7e-16	10	11	18.8	7.09	1.6e-12	10	12	22	8.32	8.4e-15	10	11	22	9.59	3.7e-17	17	21	31.3	10.56	6.1e-19	8	10	17.2	7.52	2.6e-13	8	8
[343-10]	17	WP_011084021.1	8	10	13.7	7.4	4.2e-13	6	7	7.1	5.35	1.6e-09	8	9	13.5	8.02	3.1e-14	13	13	22	7.64	1.5e-13	2	2	2.2	3.25	2.1e-07	2	2	2.4	4.96	7.6e-09	6	6	8.1	5.5	4.8e-10	7	9	9.3	7.39	4.4e-13	5	6	6	5.06	9.2e-09	6	6
[343-11]	14	WP_011084286.1	6	7	9.5	7	2.3e-12	6	7	9.5	6.18	4.9e-11	5	6	7.9	6.87	4e-12	13	13	25.1	7.15	1.2e-12	2	2	2.3	3.25	2.1e-07	2	2	2.7	4.96	7.6e-09	4	4	6.2	5.99	5.9e-11	9	11	15.9	7.71	1.1e-13	6	7	9.5	5.33	2.9e-09	5	5
[343-12]	17	WP_038965108.1	7	7	13.5	5.08	5.3e-09	6	7	12	5.44	1.1e-09	8	8	12.4	5.62	8.5e-10	14	14	23.1	8.12	2e-14	1	1	1.5	3.25	2.1e-07	2	2	3.3	4.96	7.6e-09	3	3	4.9	3.65	2e-07	8	9	12.6	6.27	1.4e-11	3	4	4.6	5.06	9.2e-09	4	4
[343-13]	13	WP_028172347.1	11	12	27.9	9.05	3.8e-16	7	8	14.5	7.47	3.2e-13	8	9	14.7	6.44	2.5e-11	9	9	17.3	7.59	1.9e-13	6	6	12.2	3.92	1.2e-08	6	6	13.4	6.47	1.2e-11	10	10	27.4	8.57	2.9e-15	10	12	25.8	8.18	1.5e-14	8	9	14.7	6.97	2.7e-12	8	8
[343-14]	9	WP_011085913.1	7	7	21.7	7.33	5.8e-13	4	5	11.9	8.39	6.3e-15	6	6	21.7	7.7	1.2e-13	8	8	27.1	8.96	5.5e-16	2	2	6.9	5.7	3.6e-11	4	4	15.2	8.03	2.9e-14	6	6	17.9	7.14	1.3e-12	8	9	24.4	7.83	6.7e-14	5	6	18.6	7.64	1.5e-13	5	5
[343-15]	12	WP_171463733.1	3	4	5	5.81	3.8e-10	4	5	7	5.72	3.4e-10	5	6	9.1	5.35	2.7e-09	12	12	17.9	6.42	2.8e-11	5	5	8.4	3.25	2.1e-07	5	5	9.5	5.7	3.1e-10	6	6	9.9	5.5	4.8e-10	9	11	17.7	6.17	8e-11	4	5	6.8	5.06	9.2e-09	1	1
[343-16]	17	WP_028172994.1	3	4	4	5.81	3.8e-10	6	7	9.3	5.35	1.6e-09	8	9	11.9	5.35	2.7e-09	11	11	16.2	5.52	1.3e-09	2	2	2.4	3.25	2.1e-07	2	2	3.1	4.96	7.6e-09	3	3	4	5.5	4.8e-10	9	11	14.8	5.27	3.8e-09	6	7	8.5	5.06	9.2e-09	6	6
[343-17]	9	WP_011089799.1	5	5	8.7	5.39	1.4e-09	3	4	5.5	4.95	9.2e-09	5	5	8.7	6.42	2.8e-11	7	7	15.7	10.88	1.5e-19	1	1	1.8	3.25	2.1e-07	1	1	1.8	4.96	7.6e-09	4	4	7.7	5.22	2.4e-10	6	7	13.4	6.57	4.2e-12	4	5	7.7	6.57	1.4e-11	2	2
[343-18]	4	WP_028175620.1	3	4	4.8	5.81	3.8e-10	3	4	4.8	5.35	1.6e-09	3	4	4.8	5.35	2.7e-09	4	4	9.7	5.41	2e-09	2	2	2.8	3.25	2.1e-07	2	2	3.8	4.96	7.6e-09	3	3	4.8	5.5	4.8e-10	5	7	9.8	5.31	3.2e-09	2	3	2.8	5.06	9.2e-09	1	1
[343-19]	4	WP_011090030.1	3	3	5.9	5.12	4.5e-09	1	2	1.8	4.95	9.2e-09	3	3	5.9	6.27	5.4e-11	4	4	8.6	5.76	4.6e-10	1	1	1.8	3.25	2.1e-07	1	1	1.8	4.96	7.6e-09	1	1	1.8	3.65	2e-07	2	3	2.9	6.27	1.4e-11	1	2	1.8	5.06	9.2e-09	1	1
[343-20]	3	WP_011085717.1	2	3	2.8	5.81	3.8e-10	4	5	7.4	5.35	1.6e-09	2	3	2.8	5.35	2.7e-09	4	4	7.4	4.98	1.3e-08	2	2	2.8	3.25	2.1e-07	1	1	1.8	4.96	7.6e-09	3	3	5.3	5.5	4.8e-10	4	6	6.2	5.27	3.8e-09	2	3	2.8	5.06	9.2e-09	2	2
[343-21]	5	WP_011084348.1	3	3	7.4	5.08	5.3e-09	5	7	13.1	4.95	9.2e-09	2	3	4.9	5.24	4.2e-09	4	4	10.3	4.98	1.3e-08	2	2	4.9	3.25	2.1e-07	2	2	4.9	4.96	7.6e-09	3	4	7.4	3.65	2e-07	3	6	7.4	4.68	8.3e-09	3	5	7.2	5.06	9.2e-09	2	3
[343-22]	3	WP_236842205.1	2	3	2.2	5.81	3.8e-10	2	3	2.2	5.35	1.6e-09	2	3	2.2	5.35	2.7e-09	4	4	7.3	4.98	1.3e-08	2	2	2.2	3.25	2.1e-07	1	1	1.4	4.96	7.6e-09	2	2	2.2	5.5	4.8e-10	4	6	4.2	5.27	3.8e-09	2	3	2.2	5.06	9.2e-09	1	1
[343-23]	4	WP_011083215.1	3	4	3.3	5.81	3.8e-10	2	3	2.2	5.35	1.6e-09	2	3	2.2	5.35	2.7e-09	4	4	6.1	4.98	1.3e-08	2	2	2.2	3.25	2.1e-07	1	1	1.4	4.96	7.6e-09	2	2	2.2	5.5	4.8e-10	3	5	3.7	5.27	3.8e-09	2	3	2.2	5.06	9.2e-09	1	1
[343-24]	1	WP_038965374.1	2	3	2.3	5.81	3.8e-10	2	3	2.3	5.35	1.6e-09	2	3	2.3	5.35	2.7e-09	2	2	2.3	4.98	1.3e-08	2	2	2.3	3.25	2.1e-07	1	1	1.4	4.96	7.6e-09	2	2	2.3	5.5	4.8e-10	2	4	2.3	5.27	3.8e-09	2	3	2.3	5.06	9.2e-09	1	1
[343-25]	3	WP_236842126.1	1	1	1.5	5.08	5.3e-09	1	2	1.5	4.95	9.2e-09	2	2	2.3	5.24	4.2e-09	1	1	1.5	4.98	1.3e-08	1	1	1.5	3.25	2.1e-07	1	1	1.5	4.96	7.6e-09	1	1	1.5	3.65	2e-07	1	2	1.5	4.68	8.3e-09	1	2	1.5	5.06	9.2e-09	2	2
[344]		WP_028174694.1	21	38	42	10.19	2.9e-18	18	32	41	8.18	1.5e-14	20	31	42	9.63	3.2e-17	20	36	43.2	10.19	2.9e-18	19	35	38.5	10.04	5.6e-18	22	39	52	9.08	3.3e-16	22	39	41	10.17	3.1e-18	21	39	42	9.81	1.5e-17	20	37	40.5	10.06	5e-18	23	38
[345]		WP_028173518.1	22	37	78.2	9.15	2.5e-16	17	24	59.1	8.65	2.1e-15	19	28	72.3	9.47	6.3e-17	17	21	60.7	9.91	9.6e-18	19	23	63	11.8	3e-21	21	32	75.6	11.1	6.1e-20	21	34	71	10.53	6.9e-19	21	32	78.2	9.88	1.1e-17	20	30	73.9	8.2	1.4e-14	17	25
[346]		WP_011085329.1	17	19	56.5	8.86	8.5e-16	11	13	39	8.19	1.5e-14	10	15	43.3	9.44	7.2e-17	14	14	51.6	8.27	1e-14	17	20	48.7	10.01	6.3e-18	24	29	71.5	9.41	8e-17	19	29	61.8	8.72	1.5e-15	21	28	61.8	8.25	1.1e-14	10	12	36.6	8.18	1.5e-14	15	16
[347]		WP_011086857.1	23	37	58.6	8.86	8.4e-16	18	19	48	9.01	4.4e-16	24	27	55.8	10.43	1e-18	20	22	49.5	8.8	1.1e-15	19	20	45.5	10.09	4.5e-18	21	26	52.4	8.61	2.4e-15	21	27	44.2	9.52	5.1e-17	24	29	58.3	9.83	1.3e-17	16	21	38.9	8.96	5.4e-16	16	19
[348]		WP_011087634.1	26	28	24.4	8.5	3.6e-15	32	35	30.6	8.1	2.2e-14	30	32	27.2	7.89	5.4e-14	29	32	27.1	8.24	1.2e-14	23	24	20.7	4.32	5.4e-09	29	32	26.2	7.29	6.9e-13	29	31	27	7.36	1.7e-13	31	35	30.8	6.94	3.1e-12	27	28	26.6	7.6	1.8e-13	27	33
[349]		WP_011085645.1	24	32	27.6	10.2	2.8e-18	19	25	18.1	9.84	1.3e-17	19	26	21.2	9.01	4.4e-16	23	30	22.7	9.52	5.1e-17	27	32	28.5	9.1	3e-16	23	31	23	10.5	7.7e-19	24	31	27.9	9.93	8.7e-18	27	36	25.6	9.98	7.2e-18	24	28	25.6	10.09	4.4e-18	23	30
[349-1]	2	WP_011084444.1	1	1	0.9	2.56	1.7e-05	1	1	0.9	2.88	2.9e-05	1	1	0.9	2.56	1.7e-05	1	1	0.9	3.34	9.7e-06	1	1	0.9	1.92	3.3e-05	2	2	3.8	3.37	1.2e-05	1	1	0.9	2.37	3.3e-05	2	2	3.8	1.78	4e-05	1	1	0.9	2.62	2.4e-05	2	2
[350]		WP_038966054.1	24	30	41.1	8.91	6.8e-16	28	37	51.4	9.07	3.4e-16	23	31	43	8.53	3.5e-15	23	31	44.6	9.36	9.9e-17	22	25	43.6	9.55	4.5e-17	20	26	40.7	8.37	6.9e-15	25	33	45.7	8.74	1.4e-15	24	30	46.3	8.82	1e-15	24	32	42	7.7	1.2e-13	25	33
[351]		WP_011089873.1	20	28	46	10.08	4.6e-18	20	29	53.1	8.52	3.6e-15	26	37	61.7	9.51	5.3e-17	21	31	59.6	9.07	3.5e-16	23	30	59.6	9.82	1.4e-17	22	30	57.1	10.2	2.8e-18	20	29	50.6	10.33	1.6e-18	25	36	61.7	9.09	3.2e-16	18	27	47.1	10.63	4.4e-19	21	30
[352]		WP_011089246.1	20	33	36.5	9.75	1.9e-17	19	28	36.1	10.11	4.1e-18	22	31	42.8	9.84	1.3e-17	21	30	37.9	9.52	5e-17	19	22	37.1	9.62	3.3e-17	21	29	42.4	8.81	1.1e-15	22	31	46.2	9.4	8.3e-17	20	28	38.9	9.33	1.1e-16	24	37	50.1	9.07	3.5e-16	24	38
[353]		WP_038967578.1	16	20	36.6	10.32	1.6e-18	14	17	33.5	11.2	4e-20	12	16	27.3	9.93	8.8e-18	16	17	30.7	8.92	6.5e-16	16	18	33.2	8.82	9.9e-16	19	22	41.5	11.03	8.1e-20	18	23	37.6	9.86	1.2e-17	21	27	42.4	11.2	3.8e-20	18	21	39	11.3	2.5e-20	23	26
[354]		WP_011083408.1	21	29	40.6	8.68	1.8e-15	22	31	40.6	7.97	3.7e-14	22	31	45.8	7.7	1.2e-13	27	31	54.9	7.99	3.5e-14	25	30	49.8	8.41	5.8e-15	26	32	54.9	9.39	8.9e-17	24	32	42.4	9.92	9.3e-18	24	31	45.8	7.17	1.1e-12	23	32	47.3	8.93	6.2e-16	22	30
[355]		WP_011085846.1	25	28	46.9	10.91	1.4e-19	28	31	46	8.6	2.6e-15	23	26	40.8	9.32	1.2e-16	28	33	51.9	8.24	1.2e-14	23	26	39.1	7.85	6.2e-14	25	30	48.2	8.3	9.3e-15	21	25	47.5	9.15	2.5e-16	24	28	50.1	10.11	4e-18	22	27	45.1	10.1	4.2e-18	24	27
[356]		WP_011084248.1	23	31	45.5	9.67	2.6e-17	17	24	42.7	9.52	5e-17	22	30	40.5	10.24	2.3e-18	19	25	39.2	6.97	2.6e-12	23	28	48.6	9.22	1.8e-16	19	27	38.3	8.48	4.3e-15	20	29	45.3	8.41	5.7e-15	23	29	47.7	9.14	2.5e-16	23	29	45.1	9.62	3.3e-17	22	28
[357]		WP_038965151.1	24	29	53.3	11.05	7.3e-20	25	28	48.3	11.7	4.7e-21	22	23	55.5	12.21	5.3e-22	22	24	44.7	10.01	6.2e-18	22	24	43.6	9.66	2.8e-17	23	25	39.6	11.16	4.5e-20	26	26	44.7	10.29	1.9e-18	26	28	52.4	11.64	6e-21	22	25	44.9	12.27	4.1e-22	22	24
[358]		WP_028174611.1	18	25	49.6	9.25	1.6e-16	22	28	52.4	11.87	2.3e-21	18	25	46.9	11.83	2.7e-21	17	23	56.8	7.65	1.5e-13	14	18	34	7.2	9.8e-13	23	29	51.4	13.68	1e-24	20	27	45.9	7.92	4.7e-14	20	26	57.1	11.96	1.5e-21	17	24	45.4	9.64	3.1e-17	18	24
[359]		WP_038967114.1	25	26	46.2	8.32	8.4e-15	26	28	41.9	7.49	2.8e-13	27	29	50.5	8.59	2.7e-15	25	28	42.4	7.44	3.5e-13	21	21	42.2	7.58	2e-13	19	20	35	7.24	8.5e-13	24	24	41	6.38	3.3e-11	23	23	38.2	7.31	6.2e-13	25	28	44	6.97	2.7e-12	24	28
[360]		WP_038966821.1	20	21	43.8	9.2	2e-16	26	29	45.6	8.64	2.2e-15	25	25	48.1	9.31	1.2e-16	26	27	45.9	6	1.7e-10	21	23	41.7	5.69	6.3e-10	21	23	43.3	7.7	1.2e-13	25	28	47.8	9.99	6.8e-18	23	23	45.5	9.23	1.7e-16	24	27	45.8	10.23	2.5e-18	26	28
[361]		WP_011087531.1	21	27	47.6	11.27	3e-20	19	25	40.8	11.87	2.2e-21	23	28	43.9	11.3	2.5e-20	25	30	48.4	10.58	5.5e-19	21	25	43.9	7.46	3.4e-13	22	27	43.9	11.83	2.6e-21	21	27	39.9	11.06	7.2e-20	23	29	44.8	10.87	1.6e-19	22	28	48.6	11.22	3.5e-20	21	31
[362]		WP_011087816.1	18	20	40.3	10.13	3.7e-18	20	23	44.7	9.81	1.5e-17	17	21	40.3	10.7	3.3e-19	19	21	35.4	7.9	5e-14	17	19	37.7	7.77	8.8e-14	21	24	49.6	10.26	2.2e-18	26	28	58.9	9.8	1.5e-17	21	23	50.8	10.87	1.6e-19	18	20	39.1	10.73	2.9e-19	16	18
[363]		WP_011087424.1	21	23	32.9	11.16	4.7e-20	26	28	33.7	10.62	4.6e-19	23	25	30.5	10.87	1.6e-19	27	28	37.1	9.81	1.4e-17	18	18	26.3	10.56	5.9e-19	22	25	32.5	10.04	5.6e-18	20	22	29	8.88	7.7e-16	21	23	29.7	8.09	2.2e-14	26	29	32.1	10.1	4.3e-18	25	28
[364]		WP_011085899.1	21	28	60.5	11.2	3.9e-20	18	24	42.2	10.45	9.6e-19	24	28	64.6	9.01	4.5e-16	23	30	57.6	10.42	1.1e-18	19	22	49	7.15	1.3e-12	18	24	43.1	8.4	6.1e-15	19	24	47.3	7.95	4.1e-14	18	27	45	8.88	7.7e-16	20	28	48.6	10.12	4e-18	22	31
[365]		WP_011083624.1	23	34	57.1	9.02	4.3e-16	22	25	56	8.73	1.5e-15	22	30	60	8.88	7.7e-16	19	24	53.1	8.74	1.4e-15	20	26	58	8.98	5e-16	23	29	62.6	10.45	9.5e-19	22	31	64	9.61	3.5e-17	22	29	58.9	9.31	1.3e-16	26	35	63.1	9.84	1.3e-17	19	27
[366]		WP_028152332.1	23	30	66.1	10.35	1.5e-18	24	32	61.8	11.41	1.6e-20	28	35	74.6	9.58	3.9e-17	23	30	67.5	10.88	1.5e-19	22	26	61.4	10.14	3.6e-18	24	34	63.2	10.94	1.2e-19	22	29	63.9	11.46	1.3e-20	22	30	58.9	10.24	2.4e-18	27	37	67.9	9.66	2.8e-17	22	31
[367]		WP_011089915.1	21	24	38	11.87	2.2e-21	24	27	36.2	7.74	9.9e-14	24	32	43.7	11.79	3.2e-21	25	32	43.9	13.18	8.6e-24	26	32	39.3	8.08	2.4e-14	22	27	45.2	11.74	3.9e-21	23	29	33.9	13.05	1.5e-23	20	24	41.8	11.85	2.5e-21	23	27	43.7	8.76	1.3e-15	24	34
[368]		WP_011084332.1	20	22	24.1	9.98	7.1e-18	22	23	22.8	8.71	1.6e-15	21	24	24.1	8.6	2.5e-15	22	24	21	7.81	7.4e-14	21	23	21.3	8.29	9.7e-15	27	31	28.2	8.55	3.2e-15	19	21	19	7.86	6e-14	26	28	27	8.65	2.1e-15	22	23	23.9	8.96	5.6e-16	17	19
[369]		WP_011085355.1	21	27	48.6	8.49	4.1e-15	16	17	44.2	8.68	1.8e-15	24	30	52.8	7.58	1.9e-13	14	14	43.2	7.64	1.6e-13	13	13	25.9	6.67	9.5e-12	22	23	48.2	8.61	2.4e-15	21	25	54.1	9.41	8.2e-17	19	22	41.1	10.43	1e-18	21	24	48.2	9.81	1.4e-17	16	17
[370]		WP_028172518.1	26	34	65.9	9.56	4.2e-17	21	28	55.6	9.17	2.2e-16	23	34	60.2	9.64	3.1e-17	19	24	54	10.31	1.8e-18	18	23	50	6.09	1.2e-10	25	34	61	9.81	1.5e-17	24	33	61	10.6	5.1e-19	23	33	59.1	10.89	1.4e-19	23	32	64.8	10.46	9.1e-19	19	27
[371]		WP_011085682.1	24	33	77.8	8.61	2.5e-15	20	25	76	8.13	1.9e-14	21	25	71	7.38	4.6e-13	20	23	69.5	8.01	3.2e-14	21	25	73.1	7.73	1e-13	21	27	75.4	9.17	2.2e-16	23	29	83.8	7.87	5.8e-14	25	32	81.7	9.67	2.7e-17	23	28	79.9	7.79	8.2e-14	23	29
[372]		WP_011087260.1	23	27	43.8	9.77	1.8e-17	23	25	45.2	8.09	2.2e-14	26	30	57.1	9.8	1.5e-17	22	25	40.6	9.47	6.3e-17	23	25	38.5	8.25	1.2e-14	28	32	56	9.45	6.8e-17	23	26	44	7.56	2.1e-13	28	34	55.4	8.61	2.4e-15	27	32	54.6	9.72	2.2e-17	23	28
[373]		WP_011088673.1	13	15	25.3	9.05	3.7e-16	23	26	41.8	12.14	7e-22	17	23	34.8	8.8	1.1e-15	20	22	39.2	10.24	2.3e-18	23	24	40.3	10.7	3.3e-19	25	28	39.7	10.07	4.7e-18	23	28	40.8	9.94	8.3e-18	22	28	35.7	8.41	5.8e-15	23	27	40.7	8.57	2.9e-15	22	27
[374]		WP_011085739.1	24	24	33.9	9.8	1.5e-17	25	26	34.8	8.8	1.1e-15	23	25	30.7	8.25	1.1e-14	27	28	35.7	8.36	7.1e-15	20	21	29.5	8.9	7.3e-16	26	29	33.4	8.53	3.4e-15	25	27	32.9	9.65	2.8e-17	26	27	32.8	8.97	5.3e-16	27	28	35	8.53	3.5e-15	26	26
[375]		WP_171463822.1	22	28	35.7	10.46	9e-19	18	20	33.8	9.16	2.4e-16	19	21	26.7	9.17	2.3e-16	18	21	22.4	7.61	1.7e-13	22	24	34.5	8.9	7.1e-16	20	24	29.7	9.57	4e-17	20	26	35.4	8.4	5.9e-15	23	29	37.9	9.39	8.8e-17	22	30	34.9	8.82	9.9e-16	24	32
[375-1]	19	WP_011088133.1	17	33	62.3	7.96	3.9e-14	13	16	59.8	6.58	1.4e-11	14	23	59	8.47	4.5e-15	17	20	65.6	7.52	2.5e-13	15	19	69.7	7.3	6.6e-13	15	22	65.6	7.02	2.2e-12	15	19	59.8	8.15	1.7e-14	15	19	65.6	8.3	9.1e-15	14	23	59.8	6.88	3.9e-12	13	17
[376]		WP_011083918.1	19	22	66.8	9.13	2.7e-16	17	22	59.9	7.32	6e-13	20	23	73	7.92	4.6e-14	19	20	52.8	9.24	1.7e-16	20	20	66.8	9	4.7e-16	20	24	66.1	9.36	1e-16	25	28	82.7	8.76	1.3e-15	19	22	59	8.92	6.7e-16	18	23	73	8.83	9.5e-16	18	21
[377]		WP_011089248.1	23	38	56	8.46	4.7e-15	18	30	50	9.46	6.7e-17	22	33	55.7	9.46	6.5e-17	22	30	54.4	8.88	7.8e-16	21	27	54.4	8.34	7.6e-15	24	34	51.3	8.53	3.4e-15	21	30	51.3	7.74	9.8e-14	21	31	54.7	8.28	9.8e-15	23	38	56	9.44	7.2e-17	22	27
[378]		WP_028171266.1	19	26	51.4	10.23	2.4e-18	21	29	49.8	10.21	2.7e-18	21	31	51.4	12.11	8.1e-22	18	29	50.6	11.2	4e-20	18	26	49	8.97	5.3e-16	25	37	52.6	11.62	6.5e-21	22	32	51.4	11.22	3.6e-20	23	31	51.4	12.55	1.2e-22	20	28	49.8	11.23	3.4e-20	22	29
[379]		WP_011085914.1	26	31	37.5	11.88	2.2e-21	25	28	40	9.36	1e-16	23	26	43.4	7.8	7.9e-14	18	21	38.5	10.37	1.4e-18	18	20	33.5	8.35	7.4e-15	23	29	43.6	8.65	2.1e-15	21	26	30.9	12.58	1.1e-22	25	29	40.6	11.65	5.7e-21	27	33	44.6	9.3	1.3e-16	23	28
[379-1]	3	WP_028175379.1	2	2	4.3	3.34	2.1e-09	2	2	4.3	1.96	3.9e-06											2	2	4.7	0.35	0.0013	2	2	4.7	0.33	0.0019	3	3	7.6	1.9	9e-07	2	2	4.3	1.19	5.7e-06	3	3	7.6	3.27	5e-08	2	2
[380]		WP_011090135.1	19	28	43.6	11.07	6.9e-20	17	24	49.7	9.82	1.4e-17	22	34	57.7	11.15	4.8e-20	20	24	47.9	8.76	1.3e-15	20	23	49.2	9.17	2.2e-16	19	23	52.3	8.73	1.5e-15	20	25	52.3	9.15	2.4e-16	20	24	51.8	8.62	2.3e-15	22	31	54.6	10.28	1.9e-18	19	27
[381]		WP_063921559.1	22	23	34.9	6.84	4.7e-12	15	15	25.4	6.99	2.4e-12	20	22	37.4	7.48	3e-13	22	25	31	7.09	1.6e-12	19	19	31.7	5.44	6.6e-10	18	20	29.3	6.9	3.7e-12	18	18	26.3	6.03	4.8e-11	27	28	38.8	8.74	1.4e-15	22	23	36.9	6.84	4.6e-12	13	14
[382]		WP_011087127.1	20	29	31.1	9.98	7.1e-18	25	32	36.7	9.31	1.2e-16	19	27	26.6	9.47	6.3e-17	29	37	35.5	9.28	1.4e-16	28	32	36.7	9.35	1e-16	28	36	38.3	9.77	1.7e-17	25	30	34.9	9.48	6.1e-17	24	33	34.9	10.13	3.7e-18	22	33	31.9	9.33	1.1e-16	26	31
[383]		WP_038965463.1	25	29	47.9	12.52	1.4e-22	19	20	41.3	6.7	8.4e-12	22	25	44.6	8.02	3.1e-14	21	22	41.3	6.31	4.4e-11	20	23	32.5	6.62	1.2e-11	24	26	49.9	8.67	1.9e-15	22	26	43.8	9.82	1.4e-17	24	29	51.9	7.47	3.2e-13	20	22	39.5	7.44	3.6e-13	23	26
[384]		WP_011085712.1	21	32	60	10.28	2e-18	16	24	47.2	8.93	6.2e-16	14	19	37.4	9.98	7e-18	14	18	42.6	8.65	2.1e-15	14	18	46.2	8.7	1.6e-15	15	23	38.4	8.6	2.5e-15	18	27	43.3	10.52	7.2e-19	21	29	53.1	9.25	1.6e-16	21	29	50.2	11.22	3.6e-20	16	24
[385]		WP_011085331.1	14	24	59.5	10.6	5e-19	11	16	47.6	9.16	2.4e-16	13	18	48.8	10.77	2.5e-19	13	17	53	10.53	6.8e-19	7	7	33.8	3.66	1.3e-08	19	31	71.3	11.07	6.8e-20	11	17	43.3	9.92	9e-18	13	20	60.1	11.09	6.3e-20	11	18	46.6	9.72	2.2e-17	11	15
[386]		WP_011088064.1	23	37	86.8	10.78	2.4e-19	18	23	74.4	8.37	6.9e-15	22	36	79.9	8.64	2.2e-15	17	23	74.4	8.69	1.7e-15	16	20	67.1	8.91	6.7e-16	18	26	75.8	7.48	3.1e-13	20	26	86.8	10.2	2.7e-18	20	23	82.6	10.73	2.9e-19	22	35	89.5	8.23	1.3e-14	18	26
[387]		WP_011083592.1	21	32	64.6	11.81	3e-21	18	29	45	9.9	1e-17	21	32	57	12.16	6.5e-22	17	23	49.4	12.26	4.2e-22	17	21	52.1	10.18	3.1e-18	16	24	44.5	11.66	5.6e-21	22	32	60.9	10.68	3.5e-19	21	30	64.1	11.66	5.5e-21	20	31	56.5	12.09	8.6e-22	19	27
[388]		WP_028174243.1	22	37	56.6	8.86	8.3e-16	21	30	53.4	8.51	3.7e-15	23	34	55.9	9.69	2.5e-17	19	24	53.8	9.22	1.8e-16	14	17	36.6	9.59	3.8e-17	13	16	40	7.96	3.9e-14	16	20	45.6	8.28	1e-14	19	25	52.8	8.51	3.8e-15	23	36	62.2	9.26	1.5e-16	25	30
[389]		WP_011083420.1	22	28	55.6	10.5	7.6e-19	15	20	40.5	8.7	1.7e-15	17	24	39.3	8.82	1e-15	22	25	60.2	10.09	4.4e-18	11	12	27.7	7.96	2.4e-14	15	15	35.6	9.98	7e-18	14	17	33.3	7.85	6.4e-14	12	14	30.7	9.96	7.6e-18	20	26	46.3	9.85	1.3e-17	22	29
[390]		WP_011083616.1	20	27	56.2	7.8	7.8e-14	18	24	65.3	9.82	1.4e-17	22	28	69.2	10.34	1.5e-18	16	20	62.2	9.27	1.5e-16	23	26	71.9	9.59	3.7e-17	24	29	67.1	9.72	2.2e-17	23	30	69.8	9.72	2.2e-17	24	30	66.8	8.48	4.3e-15	22	25	68.6	10.39	1.2e-18	21	23
[391]		WP_011084137.1	17	22	33	8.42	5.6e-15	23	29	38	8.61	2.5e-15	19	25	38.7	8.69	1.8e-15	19	24	30.5	7.83	6.8e-14	19	22	30.7	8.22	1.3e-14	20	23	34.6	8.18	1.6e-14	15	19	24.8	7.74	1e-13	18	23	33.5	8.25	1.1e-14	19	25	35.1	8.75	1.3e-15	21	29
[392]		WP_011090823.1	22	33	60	9.94	8.6e-18	19	23	56.6	9.54	4.6e-17	18	25	49.5	9.98	7.3e-18	23	26	56.6	10.41	1.1e-18	14	14	62.7	6.11	1e-10	21	27	67.1	8.98	5e-16	19	24	47.1	7.3	6.4e-13	23	29	63.4	10.56	6.1e-19	21	27	67.1	9.96	7.8e-18	21	23
[393]		WP_011085989.1	19	30	59.1	10.63	4.4e-19	18	24	47.1	9.49	5.9e-17	24	31	66.6	8.07	2.5e-14	18	22	61	8.81	1e-15	19	24	52.3	9.21	1.9e-16	23	26	64.6	9.31	1.2e-16	17	21	47.7	10.28	2e-18	18	25	56.2	11.39	1.8e-20	20	28	64.6	11.44	1.4e-20	19	24
[394]		WP_011087556.1	19	27	64.8	9.36	1e-16	17	23	63.9	8.77	1.2e-15	16	23	63.6	9.86	1.2e-17	21	25	72.9	8.38	6.5e-15	14	17	49.7	7.84	6.6e-14	20	24	69.6	9.37	9.6e-17	16	20	61.4	8.61	2.5e-15	15	20	56.9	8.04	2.8e-14	21	29	65.7	8.71	1.6e-15	17	26
[395]		WP_028173514.1	22	23	39.2	8.21	1.3e-14	22	25	40.1	10.82	2e-19	25	28	40.8	7.09	1.6e-12	24	27	46.2	8.93	6.2e-16	22	23	32.3	7.23	8.8e-13	21	23	37.3	9.1	3.1e-16	24	28	41.7	9.27	1.5e-16	23	24	41.7	8.8	1.1e-15	24	29	43.2	8.01	3.2e-14	24	26
[396]		WP_011085804.1	15	17	41.7	9.17	2.2e-16	20	23	44.5	8.75	1.4e-15	16	17	41.9	9.58	3.9e-17	26	28	57.5	9.98	7.2e-18	14	15	32.5	7.82	7.3e-14	18	19	42.9	9	4.7e-16	17	19	45.5	8.78	1.2e-15	22	22	50.1	10.36	1.4e-18	16	16	40.6	7.63	1.6e-13	15	17
[397]		WP_011086895.1	24	28	47.8	7.74	9.8e-14	23	25	52.8	9.32	1.2e-16	24	27	50.8	9.06	3.7e-16	24	28	55.2	9.42	7.6e-17	25	27	58.4	8.84	9.3e-16	22	27	54.2	8.44	5.2e-15	24	30	56.2	9.06	3.6e-16	26	33	56.4	8.81	1e-15	22	25	49.8	8.62	2.4e-15	21	25
[398]		WP_011086875.1	25	34	69.9	8.08	2.4e-14	23	29	68.8	9.53	4.8e-17	22	28	61.1	11.72	4.2e-21	21	23	58.2	8.48	4.3e-15	18	20	80.4	7.66	1.4e-13	22	26	78.7	10.07	4.9e-18	24	31	75.3	9.14	2.6e-16	26	34	77.6	8.71	1.6e-15	24	28	60.5	8.84	9e-16	17	19
[399]		WP_011083057.1	21	35	78.8	9.94	8.5e-18	14	20	54.8	8.62	2.4e-15	20	28	85.5	12.62	9.1e-23	13	18	61.4	12.18	5.9e-22	14	15	62.7	11.29	2.6e-20	11	13	62.2	11.67	5.3e-21	12	16	69.7	12.17	6.4e-22	12	13	53.5	9.9	1e-17	15	22	74.3	8.04	2.7e-14	18	22
[400]		WP_011085602.1	22	35	67.9	11.36	2e-20	19	31	65.3	8.73	1.4e-15	18	31	63.5	10.22	2.5e-18	19	28	66.1	9.39	9e-17	17	22	59.1	8.92	6.5e-16	19	31	65.3	9.72	2.2e-17	20	32	66.1	9.92	9.3e-18	18	26	66.4	8.9	7.2e-16	23	40	66.1	9.56	4.3e-17	20	31
[401]		WP_236842267.1	24	26	28.2	9.13	2.6e-16	17	18	18.4	8.89	7.5e-16	27	30	34.8	9.26	1.5e-16	24	27	28.4	8.33	7.9e-15	18	18	26.1	7.33	5.7e-13	24	26	31.7	7.95	4e-14	25	29	35.3	9.13	2.7e-16	18	21	21.6	8.76	1.3e-15	22	26	32.3	8.76	1.3e-15	23	26
[401-1]	1	WP_223153708.1	7	8	7.7	5.42	1.3e-09	5	6	6.2	4.88	8.9e-10	8	9	8.8	3.74	9.7e-07	9	10	10.8	8.14	1.8e-14	5	5	4.7	4.18	2.4e-08	8	10	6.5	7.95	4e-14	8	10	7.7	5.29	4.4e-10	5	6	5.2	7.11	1.1e-12	7	9	8	4.54	8.6e-08	7	9
[402]		WP_028171431.1	19	31	92.8	12.16	6.4e-22	13	17	73.9	11.64	6e-21	14	18	86.9	10.68	3.5e-19	13	15	92.2	11.07	6.8e-20	14	15	92.8	9.52	5e-17	16	19	92.8	10.29	1.9e-18	15	20	92.8	11.4	1.7e-20	16	22	92.8	11.46	1.3e-20	17	25	92.8	11.36	2e-20	14	20
[403]		WP_038966299.1	16	16	21.4	6.93	3e-12	18	18	22.4	7.09	1.6e-12	16	16	22.2	6.98	2.5e-12	19	19	26.5	8.39	6.2e-15	24	24	32.6	7.15	1.3e-12	27	29	34.2	8.76	1.3e-15	26	28	37.5	10.11	4e-18	27	29	38.1	10.72	3e-19	22	22	30.1	6.91	3.5e-12	22	22
[404]		WP_011087217.1	20	28	63.5	10.81	2.1e-19	19	30	59.9	11.74	4e-21	17	25	59.4	12.09	8.8e-22	18	22	56.9	10.48	8.6e-19	19	28	57.6	11.23	3.5e-20	23	31	61.4	10.18	3.1e-18	21	31	64.2	12.24	4.7e-22	20	29	53.3	11.89	2.1e-21	18	27	52.5	10.94	1.2e-19	23	30
[405]		WP_028173457.1	21	23	24.8	7.38	4.7e-13	26	29	24.7	6.79	5.8e-12	27	30	28.7	6.91	3.5e-12	30	32	30.4	7.18	1.1e-12	28	28	29.3	6.86	4.3e-12	30	31	30	7.33	5.7e-13	26	29	28.1	7.59	1.9e-13	32	36	32.8	7.85	6.3e-14	28	29	28.1	7.49	3e-13	22	23
[405-1]	9	WP_038967702.1	3	3	4.4	1.04	0.00014	4	4	5.5	2.53	2.4e-07	3	3	4.7	1.38	0.00013	5	5	8.9	2.4	1.4e-06						1	1	1	1.36	0.00014	1	1	1	1.57	7.4e-05	2	2	3.2	1.38	6.4e-05	3	3	3.7	2.31	1.6e-06	1	1
[405-2]	1	WP_231166598.1	1	1	1.3	1.04	0.00014	1	1	1.3	1.03	0.00015	2	2	6.7	1.38	0.00013	1	1	1.3	1.23	0.00016						1	1	1.3	1.36	0.00014	1	1	1.3	1.57	7.4e-05	1	1	1.3	1.38	6.4e-05	1	1	1.3	1.31	0.00011	2	2
[406]		WP_011084319.1	21	27	63	7.81	7.5e-14	14	21	42.2	8.6	2.5e-15	19	28	68.1	9.83	1.3e-17	18	22	49.1	8.29	9.6e-15	18	22	62.7	9.85	1.3e-17	19	25	61.1	9.84	1.3e-17	18	26	56.6	8.25	1.1e-14	22	31	71.1	9.75	1.9e-17	18	25	59.6	9.92	9.4e-18	18	25
[407]		WP_011088146.1	24	36	56	8.38	6.6e-15	26	38	62.7	8.79	1.1e-15	25	40	61.8	12.02	1.2e-21	24	37	64.7	9.64	3.1e-17	22	29	61.4	8.58	2.7e-15	25	40	64.3	9.53	4.8e-17	27	43	61.4	9.61	3.4e-17	24	37	53.9	7.95	4.2e-14	20	34	50.6	8.46	4.7e-15	23	36
[408]		WP_011087876.1	19	28	48.5	11.19	4.1e-20	17	23	46.5	11.19	4e-20	16	24	44.4	12.28	4e-22	18	21	48.8	12.31	3.4e-22	15	17	38.8	12.71	6.3e-23	18	26	41.5	11.55	8.8e-21	18	24	56.2	10.69	3.5e-19	17	22	48.8	12.35	2.9e-22	18	28	45.8	12.58	1.1e-22	18	24
[409]		WP_011088741.1	24	32	76.1	9.78	1.7e-17	18	22	49	7.15	1.3e-12	27	34	78.4	7.02	2.2e-12	20	22	57.4	7.41	4.1e-13	20	23	55.8	7.05	1.9e-12	22	31	69.7	7.2	1e-12	20	27	61.9	8.07	2.5e-14	21	26	62.6	9.22	1.8e-16	20	25	58.7	9.21	1.9e-16	19	21
[410]		WP_011087456.1	17	20	70.4	10.58	5.4e-19	13	16	50.7	10.66	3.9e-19	14	15	59.7	9.12	2.7e-16	10	12	36.8	10.48	8.5e-19	12	14	46.7	9.62	3.2e-17	21	24	73	11.91	1.9e-21	14	15	57.4	12.57	1.2e-22	17	21	64.9	10.8	2.2e-19	15	17	56.8	9.07	3.4e-16	16	18
[411]		WP_011086886.1	19	21	21.8	8	3.3e-14	25	26	22.9	7.94	4.3e-14	22	24	24.6	7.99	3.5e-14	24	25	27.3	8.46	4.7e-15	14	14	16.3	6.54	1.7e-11	23	24	25.8	8.1	2.1e-14	22	23	26.1	7.14	1.3e-12	18	19	22.3	7.9	5e-14	28	30	31.8	8.97	5.4e-16	25	26
[412]		WP_038967572.1	24	26	35.9	6.32	4.3e-11	30	33	36	9.44	7.2e-17	27	28	34.3	8.65	2.1e-15	26	29	33.9	6.74	7.1e-12	22	24	31.8	6.19	7.3e-11	29	32	40.6	9.42	7.8e-17	27	30	34.3	6.64	1.1e-11	31	33	38.5	6.52	1.8e-11	22	23	29.3	6.09	1.1e-10	23	26
[413]		WP_011087584.1	21	26	40.1	9.24	1.7e-16	22	26	42.8	8.11	2.1e-14	22	26	35.7	10.1	4.2e-18	23	26	38.5	9.45	6.8e-17	19	19	41.3	8.09	2.2e-14	23	25	41.6	9.24	1.7e-16	17	21	29.6	9.14	2.5e-16	24	27	40.5	8.92	6.7e-16	26	32	39.1	9.17	2.3e-16	21	26
[414]		WP_038967013.1	20	26	54.3	10.6	5e-19	19	27	62.8	8.88	7.7e-16	25	34	65.4	8.1	2.1e-14	22	27	59.1	9.26	1.5e-16	18	25	54.1	9.13	2.7e-16	24	31	63.6	8.35	7.6e-15	20	26	59.3	8.65	2e-15	24	33	64.1	9.15	2.4e-16	23	33	65.2	9.27	1.5e-16	20	26
[415]		WP_011088674.1	22	34	67	10.69	3.4e-19	16	23	63.1	8.8	1.1e-15	17	26	60.1	9.78	1.7e-17	19	24	76.4	10.24	2.4e-18	18	21	71.7	8.25	1.1e-14	22	31	79.4	10	6.5e-18	18	27	53.6	9.8	1.5e-17	17	25	64.8	10.19	3e-18	19	30	70.4	9.86	1.2e-17	16	23
[416]		WP_011083948.1	19	22	45.8	7.6	1.8e-13	25	30	53.4	8.08	2.3e-14	18	20	40.6	8.95	5.8e-16	20	21	44.9	8.79	1.1e-15	16	16	35.5	7.03	2.1e-12	20	22	43.3	7.39	4.4e-13	16	18	34.1	7.93	4.4e-14	19	24	42.2	7.71	1.1e-13	17	22	34.6	7.88	5.5e-14	22	27
[417]		WP_236842095.1	21	29	49.9	9.92	9.1e-18	17	25	39.2	10.1	4.2e-18	21	28	59.1	9.38	9.4e-17	23	28	53.5	8.67	1.9e-15	18	20	48.2	8.09	2.2e-14	22	31	60.5	11.28	2.8e-20	21	28	58.8	10.52	7.1e-19	22	31	54.5	10.32	1.7e-18	19	26	50.4	9.26	1.6e-16	20	25
[418]		WP_011083730.1	19	23	43.9	13.28	5.5e-24	18	24	38	11.63	6.4e-21	22	27	49.3	10.7	3.3e-19	14	15	31.7	7.26	7.8e-13	17	18	38	10.35	1.5e-18	19	24	40.7	10.87	1.6e-19	13	17	33.7	10.17	3.1e-18	18	22	41.2	8.64	2.2e-15	14	18	37.6	10.27	2.1e-18	13	14
[419]		WP_011088154.1	19	52	74.4	8.65	2e-15	21	32	74.4	7.95	4e-14	20	36	74.4	9.92	9.1e-18	21	26	74.4	8.38	6.7e-15	16	18	74.4	9.11	2.9e-16	21	25	74.4	7.93	4.5e-14	20	40	74.4	8.6	2.5e-15	20	32	74.4	8.82	1e-15	19	33	74.4	7.69	1.2e-13	21	30
[420]		WP_011089333.1	20	27	44	8.2	1.4e-14	20	26	42	8.55	3.2e-15	19	25	41.8	7.82	7e-14	16	19	36.3	6.53	1.7e-11	17	19	36.4	7.87	5.7e-14	21	27	42.5	8.62	2.4e-15	19	26	44.2	8.68	1.8e-15	19	24	38.2	8.69	1.7e-15	23	28	47.6	8.02	3.1e-14	23	26
[421]		WP_011087134.1	19	28	59.1	12.46	1.8e-22	20	28	50.5	10.96	1.1e-19	19	26	46.1	13.84	5.1e-25	18	24	49.8	12.03	1.2e-21	17	18	42	12.69	6.7e-23	21	25	53.2	14.93	4.8e-27	22	30	47	11.67	5.2e-21	21	26	49.8	15.1	2.4e-27	15	22	45.4	13.65	1.2e-24	18	23
[422]		WP_028172837.1	18	26	61.9	10.92	1.3e-19	18	24	62.2	10.95	1.1e-19	17	29	61.9	10.83	1.9e-19	16	23	49.2	9.09	3.1e-16	18	23	58	8.9	7e-16	21	33	64.8	10.58	5.6e-19	22	35	73.9	11.52	9.9e-21	18	23	56.7	11.64	6.1e-21	17	23	64.5	11.13	5.3e-20	18	26
[423]		WP_038967204.1	16	19	48.7	12.02	1.2e-21	13	16	46.8	12.06	1e-21	21	25	78.3	11.54	9.2e-21	22	25	53.8	12.5	1.5e-22	20	23	51.8	10.43	1e-18	21	29	64.2	11.42	1.5e-20	19	23	55.8	11.77	3.5e-21	18	24	57.2	9.36	9.9e-17	23	28	56.3	11.94	1.7e-21	17	23
[424]		WP_011084227.1	17	26	32.6	11.5	1.1e-20	17	26	36	7.19	1.1e-12	24	34	50.4	11.13	5.3e-20	23	29	47.6	11.61	6.7e-21	19	22	43.4	7.99	3.5e-14	21	26	45.4	10.58	5.4e-19	18	25	33.4	11.44	1.4e-20	20	25	36.8	10.62	4.7e-19	23	34	48.8	10.61	4.8e-19	22	28
[425]		WP_011090615.1	21	33	64.6	8.96	5.5e-16	18	27	56.4	7.88	5.4e-14	18	27	52.5	7.58	1.9e-13	18	26	55.7	9.21	1.9e-16	18	23	49.3	8.54	3.3e-15	17	25	58.2	9.84	1.3e-17	20	28	63.9	8.57	3e-15	19	29	58.2	8.58	2.7e-15	18	28	50	8.68	1.8e-15	18	25
[426]		WP_011085840.1	22	27	38.4	7.41	4.1e-13	15	17	28.7	7.72	1.1e-13	21	22	37.6	7.79	8.2e-14	20	22	33.5	7.28	7e-13	24	25	41.4	6.79	5.9e-12	23	25	46.1	7.75	9.6e-14	21	25	41.4	8.12	2e-14	17	20	32.3	8.41	5.8e-15	24	30	45.4	7.89	5.3e-14	23	28
[427]		WP_011087416.1	25	35	94.7	9.09	3.2e-16	17	21	49.6	7.5	2.8e-13	22	29	80.3	7.48	3e-13	16	21	55.7	6.4	3.1e-11	13	15	46.5	7.66	1.4e-13	19	24	69.3	6.82	5e-12	20	24	56.1	6.54	1.7e-11	18	21	70.2	6.86	4.2e-12	18	21	70.2	7.28	7.1e-13	18	24
[428]		WP_011088165.1	19	40	70.7	11.58	7.8e-21	13	28	58.2	10.7	3.3e-19	19	33	71.7	10.82	1.9e-19	16	28	69	10.58	5.6e-19	16	20	71.2	10.56	6e-19	20	37	79.3	10.87	1.6e-19	20	39	79.9	11.84	2.5e-21	18	35	71.2	10.67	3.7e-19	18	34	69	11.24	3.3e-20	19	37
[429]		WP_011086734.1	17	25	58	9.48	5.9e-17	14	18	49.2	8.12	1.9e-14	18	24	59.3	8.76	1.3e-15	16	18	45.4	9.34	1.1e-16	16	18	56.9	9.08	3.4e-16	20	26	59.7	10.23	2.5e-18	21	29	61	10.08	4.7e-18	20	28	58.3	10.35	1.5e-18	17	24	53.6	9.84	1.3e-17	18	22
[430]		WP_011090173.1	19	26	41.4	9.83	1.4e-17	17	20	37.8	9.87	1.2e-17	17	19	44.7	8.97	5.3e-16	19	22	46.3	8.42	5.5e-15	19	23	43	8.5	3.9e-15	21	26	46.3	9.09	3.1e-16	21	25	60	10.02	5.9e-18	17	22	39.5	9.3	1.3e-16	19	22	44.4	9.89	1e-17	19	24
[431]		WP_011089249.1	21	30	61.3	8.97	5.4e-16	17	23	44.7	8.6	2.6e-15	21	27	52.1	8.97	5.3e-16	21	23	45.8	9.86	1.2e-17	19	20	45.3	9.53	4.9e-17	21	25	58.7	9.17	2.2e-16	20	29	52.9	9.67	2.6e-17	18	24	49.5	9.47	6.2e-17	19	25	49.7	10.13	3.7e-18	21	23
[432]		WP_038967964.1	17	18	31.2	8.25	1.2e-14	21	24	39.1	8.02	3e-14	19	22	35.9	6.99	2.5e-12	26	30	46.3	7.89	5.2e-14	18	19	31.4	8.1	2.1e-14	22	25	37.9	8.7	1.6e-15	27	31	47.9	7.35	5.3e-13	24	28	46.3	7.88	5.6e-14	17	18	36.1	7.32	6e-13	19	21
[433]		WP_011086694.1	18	25	66.5	10.92	1.3e-19	15	24	46.5	10.69	3.5e-19	14	27	66.2	10.03	5.9e-18	14	22	52.1	9.71	2.3e-17	10	13	29.9	9.22	1.9e-16	15	21	50.7	11.36	2e-20	12	18	46.2	11.15	4.9e-20	12	17	51.3	10.83	1.9e-19	15	21	53.5	11.12	5.5e-20	14	22
[434]		WP_011085223.1	20	25	36.6	9.04	4e-16	17	21	34.7	9.14	2.6e-16	21	24	41.1	8.45	4.9e-15	17	20	36.6	7.76	9.3e-14	16	22	28.7	7.89	5.3e-14	22	29	39.3	8.84	9e-16	21	29	39.5	10.13	3.8e-18	21	29	43.2	9.95	8.2e-18	14	17	30.6	7.73	1.1e-13	17	19
[435]		WP_011087354.1	19	25	61.4	8.24	1.2e-14	12	20	49.7	9.03	4.2e-16	15	23	58.6	7.82	7.2e-14	14	18	58	10.11	4.1e-18	15	20	59	9.16	2.4e-16	19	25	68.2	10.6	5.1e-19	20	28	81.8	10.29	1.9e-18	18	24	80.2	9.97	7.3e-18	17	24	69.1	8.3	9.2e-15	17	26
[436]		WP_011087282.1	21	31	45.4	8.12	2e-14	16	22	39.2	7.96	3.9e-14	20	27	40.7	9.3	1.3e-16	16	21	37.2	7.9	5e-14	17	20	49.9	8.05	2.6e-14	20	27	50.1	8.81	1e-15	20	27	47.2	9.45	6.7e-17	20	29	44.2	9.26	1.5e-16	19	29	46.9	8.67	1.9e-15	19	23
[437]		WP_011088349.1	20	22	42.1	7.33	5.9e-13	22	24	48.2	8.6	2.5e-15	26	28	52.9	8.95	5.7e-16	18	19	36.8	6.58	1.4e-11	13	15	30.2	6.04	5.9e-11	17	18	34.2	6.95	2.9e-12	20	24	42.5	8.75	1.3e-15	23	27	46.7	9.43	7.4e-17	22	22	44.2	9.7	2.4e-17	17	18
[438]		WP_011086861.1	22	25	74.2	9.91	9.7e-18	16	19	59.3	9.36	1e-16	17	21	60	10.71	3.1e-19	14	16	47.5	10.63	4.5e-19	15	16	49.8	9.58	3.9e-17	17	22	54.2	11.9	2e-21	20	24	61	9.52	5.2e-17	18	22	62.7	10.01	6.3e-18	18	22	57.3	10.53	6.9e-19	21	24
[439]		WP_038965474.1	20	20	55	8.81	1.1e-15	29	31	61.3	7.9	5e-14	23	26	54	8.68	1.8e-15	25	26	53.1	7.71	1.2e-13	18	20	47.4	7.67	8.9e-14	26	29	65.3	8.13	1.9e-14	20	21	60.4	7.63	1.6e-13	20	24	54	8.97	5.2e-16	25	30	52.6	8.81	1.1e-15	22	24
[439-1]	19	WP_028172947.1	14	14	34.2	8.82	9.9e-16	14	15	29	6.42	2.8e-11	16	18	31.1	8.67	1.9e-15	17	17	36.1	7.34	5.5e-13	2	2	4.3	4.04	1.9e-07	7	7	18.3	7.01	1.5e-12	7	7	15.4	6.44	2.5e-11	8	9	20.7	7.7	2.6e-14	19	21	38.5	8.08	2.4e-14	14	14
[440]		WP_011088668.1	18	19	38.7	7.54	2.3e-13	14	15	37.7	8.81	1.1e-15	12	14	26.1	7.29	6.9e-13	17	18	41.9	7.75	9.5e-14	21	23	50	8.09	2.3e-14	20	22	52.8	9.04	3.9e-16	22	24	54.5	8.4	5.9e-15	25	29	57.7	8.62	2.3e-15	18	22	45.5	7.88	5.5e-14	19	21
[441]		WP_011088696.1	21	28	56.1	8.43	5.2e-15	20	25	54.4	9.94	8.4e-18	22	28	59.2	8.44	5e-15	23	28	59.2	8.79	1.1e-15	22	23	59.2	7.98	3.6e-14	22	27	55.4	8.86	8.3e-16	21	26	51.6	9.61	3.5e-17	21	26	57.5	8.57	2.9e-15	19	23	53.3	8.63	2.3e-15	23	28
[442]		WP_011083542.1	16	24	54.5	8.85	8.8e-16	14	21	48.6	8.2	1.4e-14	13	21	37.4	10.13	3.8e-18	14	21	48	7.79	8.2e-14	16	21	43	8.54	3.4e-15	22	29	66	9.19	2.1e-16	16	25	60.4	9.15	2.5e-16	20	29	68.2	9.36	9.9e-17	14	21	50.5	8.58	2.8e-15	16	25
[443]		WP_011087379.1	23	30	45.7	9.22	1.9e-16	22	31	54.8	8.62	2.3e-15	24	36	55	9.54	4.5e-17	23	30	49.7	9.96	7.7e-18	18	24	43.9	7.08	1.7e-12	23	34	48.8	9.08	3.3e-16	24	34	55	8.07	2.5e-14	24	35	47.9	8.98	5e-16	24	32	57	8.79	1.1e-15	20	27
[444]		WP_011088151.1	18	48	46.6	9.09	3.1e-16	18	42	46.6	9.07	3.5e-16	19	44	55.9	9.84	1.3e-17	17	39	53.8	8.94	5.9e-16	17	31	46.6	9.04	3.9e-16	17	36	53.4	9.23	1.7e-16	21	56	69.3	8.86	8.3e-16	21	49	72.7	9.84	1.3e-17	16	42	51.7	8.91	6.8e-16	19	42
[445]		WP_011087859.1	24	26	67.9	8.27	1e-14	25	30	67.9	8.68	1.8e-15	21	25	64.8	8.09	2.2e-14	19	23	57.1	7.62	1.7e-13	18	22	61.6	8.54	3.4e-15	22	30	61.3	9.27	1.5e-16	18	22	53.3	8.92	6.4e-16	17	19	58.1	8.18	1.5e-14	24	30	68.6	9.19	2e-16	22	26
[446]		WP_011088401.1	17	42	63.6	13.36	3.9e-24	15	24	62.5	12.99	1.9e-23	16	29	63.6	10.74	2.8e-19	12	19	48.1	9.67	2.6e-17	11	17	46.9	13.02	1.7e-23	17	30	69.8	13.67	1.1e-24	16	32	63.6	12.23	4.9e-22	15	27	56.3	13.04	1.5e-23	18	31	70.4	12.23	4.8e-22	14	27
[447]		WP_011083850.1	20	23	38	8.88	7.9e-16	22	24	41.5	8.83	9.5e-16	23	26	40.6	8.94	6.1e-16	24	26	45.1	10.81	2e-19	16	17	32.7	8.64	2.1e-15	25	28	47.2	9.36	9.8e-17	22	25	46	9.5	5.6e-17	21	23	32.2	9.61	3.4e-17	23	24	42.5	8.54	3.2e-15	20	22
[448]		WP_011089852.1	19	28	60.6	10.85	1.7e-19	19	28	63.3	11.92	1.8e-21	19	31	60.6	9.96	7.9e-18	20	29	58.7	12.9	2.8e-23	17	23	54.3	11.06	7.2e-20	20	28	58.7	12.69	6.7e-23	20	26	56.8	12.13	7.4e-22	17	24	55.4	10.48	8.3e-19	19	29	58.2	9.65	2.8e-17	21	29
[449]		WP_011089346.1	20	26	62.5	8.78	1.2e-15	19	25	52.7	11.26	3e-20	23	28	66	8.84	9.1e-16	15	21	44.4	6.9	3.5e-12	18	22	59.5	8.94	6e-16	18	23	59.7	9.13	2.7e-16	16	20	43.8	6.96	2.8e-12	19	24	59	8.13	1.9e-14	17	23	46.2	8.25	1.2e-14	19	25
[450]		WP_038965348.1	21	26	52.1	10.69	3.5e-19	22	28	49.6	7.52	2.6e-13	24	31	63.3	7.7	1.2e-13	18	22	44.5	9.64	3e-17	19	21	58.3	9.17	2.2e-16	22	28	61.2	10.78	2.3e-19	23	28	58.9	10.24	2.3e-18	23	28	51.1	9.87	1.1e-17	17	20	44.9	6.82	5e-12	20	24
[451]		WP_011088346.1	19	20	38.6	7.63	1.6e-13	26	28	44.4	8.17	1.6e-14	25	26	43.5	8.41	5.6e-15	24	24	47.7	6.24	6e-11	24	25	49.2	6.61	1.3e-11	27	28	50.3	6.03	3.4e-11	28	30	49.4	7.49	2.9e-13	29	30	49.2	6.35	3.8e-11	19	19	35.5	8.71	1.6e-15	22	24
[452]		WP_011085303.1	14	16	25.2	8.61	2.5e-15	25	30	45.6	8.52	3.6e-15	20	22	33.6	8.97	5.4e-16	20	21	33	6.89	3.8e-12	21	24	35.7	6.31	4.5e-11	27	29	45.6	10.18	3e-18	19	25	41	8.17	1.6e-14	15	17	28.3	8.15	1.7e-14	16	20	29.1	6.7	8.4e-12	20	23
[453]		WP_028174702.1	18	22	35.6	8.47	4.5e-15	23	27	49.4	8.06	2.5e-14	26	30	57.3	8.62	2.4e-15	24	27	48.5	8.17	1.6e-14	18	20	39.4	8.14	1.8e-14	18	21	36	9.26	1.5e-16	20	22	42.5	8.4	6.1e-15	20	25	46.8	7.47	3.2e-13	20	23	41.4	7.75	9.7e-14	20	24
[454]		WP_011089341.1	23	26	42	8.74	1.4e-15	24	28	46.3	7.39	4.4e-13	20	24	40.3	7.43	3.7e-13	27	30	45.2	8.48	4.3e-15	22	23	42.4	6.79	2.4e-12	25	29	48.8	7.94	4.2e-14	22	25	45.4	7.9	4.9e-14	21	24	40	8.22	1.3e-14	23	27	47.3	7.32	5.9e-13	23	25
[455]		WP_011085963.1	19	38	48.8	8.52	3.6e-15	20	35	49.1	9.11	2.9e-16	24	47	56.1	7.23	8.8e-13	20	32	45.8	8.19	1.5e-14	21	32	52	7.64	1.5e-13	23	43	60.1	11.3	2.6e-20	21	42	50.4	9.76	1.8e-17	22	43	48.8	8.99	4.8e-16	16	36	47.2	7.55	2.3e-13	23	39
[455-1]	2	WP_011084547.1	2	5	7	7.18	1.1e-12	3	5	11.1	7.62	1.6e-13	2	4	7	7.23	8.8e-13	1	2	3.8	6.46	1.4e-11	3	4	11.1	6.59	6.8e-12	2	5	7	6.72	3.9e-12	2	3	7	8.03	2.9e-14	2	4	7	7.56	2.2e-13	2	4	7	7.55	2.3e-13	2	3
[456]		WP_011089980.1	19	24	46	8.36	7.2e-15	18	23	45.2	7.31	6.2e-13	22	27	52.4	7.65	1.5e-13	15	18	39.1	8.69	1.7e-15	19	21	45.2	7.08	1.7e-12	21	26	53	8.79	1.1e-15	20	25	54.8	8.26	1.1e-14	22	30	56.6	9.42	7.7e-17	18	22	48.3	7.98	3.6e-14	14	18
[457]		WP_011087339.1	18	34	56.2	12.45	1.9e-22	17	24	56.2	10.77	2.5e-19	18	30	56.2	9.84	1.3e-17	18	28	56.2	11.36	2e-20	14	20	44.1	8.01	3.2e-14	17	25	56.2	9.08	3.3e-16	17	30	56.2	9.39	8.7e-17	18	26	54.3	10.25	2.3e-18	16	27	50.8	13.24	6.5e-24	16	23
[458]		WP_011087787.1	18	31	16.3	11.61	6.7e-21	18	28	17.4	12.72	5.9e-23	21	35	18.1	12	1.3e-21	21	35	17.4	11.67	5.3e-21	15	16	16.1	6.16	3e-11	20	25	18.8	11.52	1e-20	16	23	17.4	7.94	4.2e-14	16	20	15.9	10.82	2e-19	18	26	16.9	10.84	1.8e-19	17	28
[459]		WP_011087114.1	17	21	45.5	9.78	1.7e-17	17	23	41.4	10.53	6.8e-19	18	24	46.5	10.02	6e-18	19	22	40	9.58	3.9e-17	19	22	47.7	9.7	2.4e-17	22	29	50.4	9.65	2.9e-17	14	17	36.6	10.4	1.2e-18	18	24	49.2	10.63	4.4e-19	15	20	41.7	9.56	4.2e-17	18	21
[460]		WP_011083629.1	18	24	38.4	9.47	6.2e-17	17	22	33.4	8.16	1.7e-14	18	25	44.1	9.19	2e-16	18	24	33.6	9.03	4.1e-16	18	21	45.7	12.42	2.2e-22	22	30	50.1	9.24	1.7e-16	18	22	38	9.69	2.4e-17	20	27	40.6	8.64	2.1e-15	16	20	34.2	8.62	2.4e-15	19	24
[461]		WP_011088694.1	19	24	61.7	9.33	1.1e-16	8	12	29.3	6.88	4e-12	21	24	63	10.13	3.8e-18	12	15	28.6	7.05	1.9e-12	9	13	30.4	6.67	9.7e-12	14	18	38.3	7.6	1.8e-13	13	14	57.1	7.49	2.9e-13	14	17	54.8	7.76	9.3e-14	14	18	42.9	8.85	8.9e-16	15	19
[462]		WP_011089259.1	16	20	36.7	8.41	5.8e-15	19	25	39.2	8.87	8.1e-16	17	22	38.4	7.72	1.1e-13	17	21	37.9	8.37	6.9e-15	17	17	44	8.66	2e-15	19	25	43.8	8.85	8.7e-16	17	23	44.2	7.56	2.1e-13	24	31	56.4	9.51	5.2e-17	18	24	47.4	11.33	2.3e-20	15	19
[463]		WP_011087863.1	21	26	47.6	9.5	5.5e-17	17	23	35.3	9.85	1.2e-17	22	28	58	9.4	8.5e-17	20	24	47.8	9.04	3.9e-16	22	28	56.8	8.23	1.2e-14	21	27	45.4	9.76	1.8e-17	21	27	50.7	9.7	2.3e-17	20	27	38.4	8.91	6.9e-16	20	24	47.6	8.72	1.5e-15	19	23
[464]		WP_011083393.1	21	26	40.3	8.98	5.1e-16	23	31	44.7	8.06	2.5e-14	16	21	36	7.92	4.7e-14	22	29	42.8	7.41	4.1e-13	20	24	42.8	8.72	1.5e-15	22	27	43.3	8.75	1.3e-15	17	23	40	8.31	8.7e-15	18	25	39.1	8.79	1.1e-15	19	28	41.4	9.33	1.2e-16	22	29
[465]		WP_011090570.1	21	27	78.3	9.42	7.8e-17	13	15	52.2	7.2	1e-12	17	19	63.2	10.02	6e-18	16	18	53	8.12	2e-14	17	18	66.8	10.02	6.1e-18	17	20	67.6	10.99	9.5e-20	19	22	67.6	10.61	4.9e-19	17	21	67.6	8.86	8.5e-16	19	23	67.6	9.82	1.4e-17	16	18
[466]		WP_063921378.1	19	22	29.7	6.87	4.1e-12	24	28	40.9	6.94	3e-12	18	21	35.2	7.73	1.1e-13	20	22	35.2	10.01	6.2e-18	22	23	38.8	8.5	3.9e-15	22	25	39.1	10.52	7.1e-19	23	28	42	8.28	9.9e-15	25	30	44.8	8.84	9.1e-16	13	14	22.4	8.38	6.6e-15	14	17
[467]		WP_011087700.1	22	26	55.7	9.9	9.8e-18	22	25	52.8	9.42	7.8e-17	20	22	57.3	10.26	2.2e-18	19	21	36.1	10.37	1.3e-18	25	26	59	9.17	2.3e-16	22	26	52.8	9.39	8.8e-17	20	22	54.7	9.94	8.4e-18	20	23	49.8	9.15	2.4e-16	19	22	42.7	8.7	1.7e-15	16	20
[468]		WP_011084220.1	18	24	69.5	10.66	3.8e-19	17	19	59.2	10.57	5.7e-19	19	24	71	8.97	5.2e-16	19	21	66.4	10.15	3.4e-18	15	16	48.5	7.95	4e-14	21	24	67.9	9.8	1.5e-17	21	27	71	10.67	3.8e-19	18	23	63.4	9.21	1.9e-16	17	20	71	9.31	1.2e-16	19	23
[469]		WP_011087139.1	19	23	58.5	14.48	3.3e-26	13	17	38.7	8.56	3.1e-15	17	19	40.9	8.81	1e-15	19	24	48	8.84	9.2e-16	8	8	27.2	6.68	7.4e-12	13	16	47.4	8.34	7.6e-15	12	14	43.7	8.14	1.8e-14	13	14	44.3	9.06	3.7e-16	19	28	52.9	13.66	1.1e-24	17	24
[470]		WP_011088916.1	19	23	36.6	12.33	3.2e-22	17	18	31.7	8.03	2.9e-14	17	18	46.1	8.18	1.5e-14	14	16	27.8	7.61	1.7e-13	10	11	35.4	7.91	4.9e-14	9	11	25.1	8.11	2.1e-14	12	12	34.6	7.16	1.2e-12	14	15	35.9	7.85	6.4e-14	14	15	36.1	9.32	1.2e-16	15	17
[471]		WP_011083188.1	23	25	26	8.7	1.7e-15	23	26	24.5	8.44	5.1e-15	26	29	30.2	6.82	5.1e-12	26	30	30.4	7.54	2.4e-13	21	21	19.6	6.11	1.1e-10	24	26	27.5	6.7	8.3e-12	21	22	25.8	6.46	2.4e-11	25	29	31.4	8.11	2e-14	25	28	30.4	8.02	3e-14	23	25
[472]		WP_011088178.1	20	32	72	9.27	1.5e-16	15	26	53.4	10.26	2.2e-18	16	26	70.5	10.28	2e-18	15	21	59.7	8.36	7.2e-15	19	21	54.5	9.07	3.5e-16	19	30	67.5	9.78	1.7e-17	18	30	61.2	9.85	1.2e-17	18	30	71.3	9.59	3.8e-17	16	30	65.7	10.27	2e-18	17	28
[473]		WP_011083583.1	25	28	50	6.98	2.5e-12	23	26	43.1	6.34	3.9e-11	26	28	51	7.2	9.9e-13	27	28	44.7	6.44	2.6e-11	19	20	35.9	8.05	2.7e-14	28	31	54.6	9.54	4.6e-17	24	26	45.2	6.49	2e-11	27	32	53.1	6.42	2.8e-11	20	23	37	8.56	3.1e-15	19	20
[474]		WP_011090175.1	16	38	79	10.85	1.7e-19	10	24	53.8	11.35	2e-20	16	36	81.1	10.46	9.1e-19	10	19	39.9	10.25	2.3e-18	10	15	54.2	9.1	3e-16	15	29	58.4	10.16	3.3e-18	12	33	58.4	11	9.1e-20	14	28	79	10.83	1.9e-19	13	31	55.5	11.23	3.4e-20	13	31
[475]		WP_011087249.1	17	24	63.8	9.19	2.1e-16	12	16	51.6	8.61	2.4e-15	14	19	61.6	9.13	2.7e-16	14	18	58.2	9	4.7e-16	10	13	43.1	7.39	4.5e-13	18	23	67.9	9.47	6.2e-17	16	23	62.9	8.29	9.7e-15	18	26	69.5	9.69	2.5e-17	14	18	55	8.77	1.2e-15	16	20
[475-1]	1	WP_011086498.1	1	1	4	0.18	0.00027						1	1	5.3	8.16	1.7e-14	3	3	9.6	3.21	4e-08	1	1	5.6	6.7	8.3e-12	4	4	14.9	9.13	2.7e-16	2	2	9.6	8.2	1.4e-14	2	2	9.6	9.46	6.4e-17	2	2	5.6	8.77	1.2e-15	2	2
[476]		WP_171463825.1	18	20	34.7	9.38	9e-17	17	18	37.5	8.62	2.4e-15	15	17	36.9	9.67	2.6e-17	18	20	36.9	7.77	8.8e-14	14	14	25	6.23	1.1e-11	21	25	46.3	7.75	9.4e-14	15	16	31.9	7.99	3.5e-14	19	20	41.8	9.35	1e-16	21	23	45.3	9.14	2.5e-16	16	18
[477]		WP_011090223.1	18	22	38.9	9.69	2.5e-17	18	21	36.6	8.5	3.9e-15	22	26	45.4	8.96	5.4e-16	23	27	45	7.68	1.3e-13	15	15	32.2	6.65	1e-11	23	28	42.1	6.73	7.4e-12	24	28	50.4	10.3	1.8e-18	24	26	55.6	8.87	8.1e-16	22	25	46.2	11.5	1.1e-20	24	27
[477-1]	4	WP_038965243.1	1	1	2.1	3.88	4.8e-07	3	3	6.4	4.42	1.4e-07	3	3	6.4	3.81	1.2e-06	5	5	13.1	4.68	2.8e-08	3	3	7.4	3.45	1.1e-07	4	4	9.7	4.58	2.5e-08	3	3	6.4	3.59	1.7e-06	3	3	6.4	3.37	1.5e-06	3	4	6.4	2.7	4.4e-06	2	2
[478]		WP_011084264.1	20	26	41.1	7.8	7.8e-14	24	30	47.5	8.98	5.2e-16	21	26	45.8	8.79	1.2e-15	20	23	41.1	8.41	5.6e-15	17	21	32.5	7.59	1.9e-13	21	28	45.8	8.49	4.1e-15	22	26	41.1	9.57	4e-17	23	28	42.8	8.42	5.6e-15	20	23	38.1	9.5	5.5e-17	17	20
[479]		WP_011088171.1	21	32	72.7	10.03	5.8e-18	18	23	52.9	8.7	1.6e-15	18	26	62.2	11.02	8.4e-20	18	21	55.3	8.52	3.6e-15	14	17	42.6	11.02	8.4e-20	22	28	71.5	9.44	7.1e-17	21	28	55.9	9.85	1.2e-17	21	29	61.6	9.81	1.4e-17	19	26	60.4	10.51	7.4e-19	19	23
[480]		WP_011086929.1	20	26	58.8	11.37	1.9e-20	13	16	37.6	7.31	6.3e-13	18	23	47.1	9.92	9.2e-18	17	21	46.8	8.26	1.1e-14	15	17	44.9	8.71	1.6e-15	16	22	51.5	9.54	4.7e-17	15	20	47.3	9.25	1.6e-16	19	24	51.3	9.07	3.5e-16	18	24	54.4	10.66	3.9e-19	16	22
[481]		WP_011087225.1	21	27	64.2	9.15	2.5e-16	20	23	50	8.28	1e-14	20	26	44.8	6.88	3.9e-12	20	23	45.6	9.13	2.7e-16	18	20	39	12.1	8.5e-22	23	27	42.2	9.58	4e-17	21	26	51.5	8.63	2.3e-15	26	32	55.5	7.47	3.2e-13	23	30	52.9	9.04	3.9e-16	21	24
[482]		WP_038967037.1	20	27	53.3	8.54	3.3e-15	15	23	45.4	9.55	4.5e-17	21	28	58.5	9.14	2.6e-16	21	23	53.3	10.66	3.9e-19	17	19	48.3	9.79	1.6e-17	18	23	48.3	9.64	3e-17	21	27	56.9	11.98	1.4e-21	17	25	48	8.3	9.2e-15	18	31	52.5	8.88	7.6e-16	20	26
[483]		WP_236842201.1	20	22	65.3	8.78	1.2e-15	18	20	51.7	8.43	5.3e-15	14	15	45.8	8.89	7.4e-16	19	19	57.1	8.48	4.3e-15	13	13	41.5	7.61	1.7e-13	17	17	52.3	8.09	2.2e-14	17	17	54.8	7.74	1e-13	13	13	42.9	8.14	1.8e-14	16	20	52.8	9.69	2.4e-17	14	15
[484]		WP_028174325.1	21	27	86	8.3	9.3e-15	18	21	43.8	7.44	3.6e-13	21	24	73.2	7.55	2.3e-13	18	23	63.1	7.82	7.2e-14	15	20	43.2	7.58	2e-13	25	32	76.5	8.68	1.8e-15	18	24	60.4	7.4	4.3e-13	20	27	67.6	8	3.2e-14	22	28	70.5	7.85	6.1e-14	21	24
[485]		WP_011084338.1	20	25	59.8	10.21	2.7e-18	14	17	32.2	10.29	1.9e-18	16	18	42.2	9.81	1.5e-17	18	21	51.3	10.92	1.3e-19	18	23	50	8.38	6.5e-15	17	19	51.3	9.07	3.5e-16	15	18	44	8.82	1e-15	19	22	57	10.49	8.1e-19	19	22	51	10.32	1.7e-18	20	24
[486]		WP_038967050.1	22	26	63.4	14.01	2.5e-25	20	25	52.8	7.11	1.5e-12	23	27	66.3	11.74	3.9e-21	18	21	48.9	10.39	1.2e-18	17	19	44	6.66	1e-11	20	23	58	11.16	4.7e-20	22	28	63.4	12.59	1.1e-22	22	28	60.7	6.64	1.1e-11	20	24	60	10.71	3.2e-19	18	22
[487]		WP_011085693.1	18	24	47.2	13.3	5e-24	17	20	49.6	8.15	1.8e-14	16	19	36.2	8.21	1.3e-14	20	27	52.5	9.18	2.1e-16	12	13	35.9	8.86	8.6e-16	22	25	59.1	9.31	1.2e-16	17	21	47.2	8.92	6.4e-16	15	18	36.2	8.34	7.7e-15	16	19	50.4	9.03	4.1e-16	16	18
[488]		WP_011084240.1	21	32	72.8	8.74	1.4e-15	16	21	70.1	8.44	5.1e-15	19	26	71.7	8.54	3.3e-15	18	22	73.4	7.81	7.5e-14	16	20	66.8	8.96	5.5e-16	17	21	73.4	7.19	1e-12	21	28	73.4	8.26	1.1e-14	19	26	76.1	8.84	9.4e-16	20	26	73.4	8.1	2.2e-14	17	22
[489]		WP_011089468.1	23	29	58.8	9.47	6.2e-17	20	25	39.9	9.39	8.8e-17	21	26	48.1	7.3	6.7e-13	19	22	43.7	7.28	7.1e-13	16	19	40.3	7.04	1.9e-12	18	20	40.3	8.77	1.2e-15	19	22	47.7	8.97	5.3e-16	17	21	38.3	8.8	1.1e-15	21	26	48.1	8.65	2.1e-15	14	16
[490]		WP_011083352.1	15	33	33.4	10.14	3.6e-18	15	28	28.2	9.98	7e-18	18	47	29	9.86	1.2e-17	19	39	27.1	10.11	4.1e-18	13	20	24.2	8.28	1e-14	15	25	29	10.16	3.4e-18	11	23	20.7	8.07	2.5e-14	18	37	32.6	10.34	1.5e-18	20	54	36.8	11.1	5.9e-20	16	38
[491]		WP_011088960.1	14	18	32.5	8.28	1e-14	12	13	28.3	5.85	3.1e-10	14	17	36.9	9.24	1.6e-16	19	21	41	7.62	1.7e-13	4	4	8.5	4.18	8.7e-10	5	5	10.1	5.55	8.8e-11	4	4	8.5	3.77	5.7e-09	2	2	3.5	1.57	5.3e-06	20	26	44.3	7.64	1.6e-13	21	26
[492]		WP_011083356.1	20	23	48	9.86	1.2e-17	18	21	45.2	7.13	1.3e-12	22	25	49.2	8.58	2.8e-15	21	26	54.5	7.69	1.2e-13	22	24	48.8	9.09	3.2e-16	22	27	50	8.06	2.6e-14	23	28	51.8	8.81	1e-15	21	26	48	7.19	1.1e-12	17	21	38.5	6.69	8.6e-12	20	22
[493]		WP_038965397.1	17	19	25.3	9.67	2.6e-17	20	22	27.4	7.59	1.9e-13	22	24	30.7	10.39	1.3e-18	21	23	30.6	7.56	2.2e-13	25	26	34.9	7.42	4e-13	24	28	37	7.25	8e-13	21	24	30.1	7.51	2.7e-13	20	22	28.8	9.56	4.2e-17	16	18	21.3	5.93	2.2e-10	19	21
[494]		WP_011087076.1	20	23	48.6	8.82	9.9e-16	20	25	53.6	9.08	3.3e-16	20	23	51.8	9.6	3.5e-17	20	24	55	9.75	1.9e-17	16	16	43.6	9.62	3.3e-17	23	27	61.4	9.61	3.4e-17	20	22	54.2	8.96	5.4e-16	22	27	46.8	8.74	1.4e-15	19	24	50.4	8.37	6.8e-15	22	24
[495]		WP_011083978.1	15	22	39.3	10.68	3.6e-19	14	21	40.3	11.15	4.8e-20	19	26	45	10.54	6.5e-19	17	21	52.2	10.69	3.5e-19	12	18	37.3	9.75	1.9e-17	17	23	50.2	9.61	3.4e-17	17	24	61.4	10.92	1.3e-19	17	23	49.5	9.43	7.3e-17	18	26	52.7	9.63	3.2e-17	17	22
[496]		WP_051000404.1	19	19	32.9	7.95	4e-14	19	19	34	8.75	1.4e-15	18	19	29	8.25	1.2e-14	21	22	37.2	8.67	1.9e-15	20	20	36.3	7.98	3.5e-14	23	26	38.3	8.55	3.2e-15	19	22	31.6	8.08	2.4e-14	26	27	40.3	8.23	1.2e-14	19	19	33.6	7.78	8.3e-14	17	17
[497]		WP_028171596.1	21	27	43	9.78	1.7e-17	19	23	42.6	9.88	1.1e-17	14	15	32.8	9.17	2.3e-16	19	21	42.2	9.51	5.3e-17	20	22	43.8	9.05	3.8e-16	21	24	37.9	9.21	1.9e-16	19	24	38.7	9.68	2.5e-17	21	25	43.6	10.01	6.3e-18	19	24	39.1	9.21	1.9e-16	15	17
[498]		WP_011090826.1	18	27	74	8.49	4e-15	17	25	48.8	8.49	4e-15	21	31	74	8.19	1.5e-14	16	26	54.4	7.89	5.3e-14	15	20	48.8	8.56	3e-15	18	33	63.3	8.8	1.1e-15	19	31	74.7	8.85	9e-16	24	35	63.3	8.72	1.6e-15	14	24	58.7	8.47	4.4e-15	16	26
[499]		WP_011083023.1	18	23	55.6	9.47	6.1e-17	16	22	45.9	9.94	8.6e-18	19	23	48.8	9.55	4.5e-17	17	24	57.2	9.59	3.7e-17	15	18	44.1	8.12	2e-14	23	27	61.9	10.24	2.4e-18	16	19	38.4	9.4	8.5e-17	20	24	57.2	10.4	1.2e-18	20	25	51.9	9.69	2.5e-17	18	24
[500]		WP_011089298.1	19	24	46.2	9.75	1.9e-17	19	24	42.8	8.41	5.7e-15	21	27	53.6	9.69	2.4e-17	21	25	38.4	9.28	1.4e-16	22	23	48.3	7.69	1.3e-13	22	28	45.4	10.2	2.8e-18	21	27	52.3	10.82	2e-19	20	26	45.8	11.12	5.5e-20	17	24	42.4	10.62	4.6e-19	20	23
[501]		WP_011083285.1	17	32	49.3	8.88	7.7e-16	12	25	39.1	7.84	6.5e-14	16	31	43.2	12.74	5.6e-23	16	29	37.1	13.24	6.6e-24	16	24	45.6	6.59	1.3e-11	18	38	49.3	11.88	2.2e-21	16	31	49.3	11.78	3.3e-21	15	30	40.1	14.45	3.8e-26	15	33	48.3	11.87	2.3e-21	16	28
[502]		WP_038965256.1	21	28	58.5	9.98	7.1e-18	13	14	43.3	8.57	2.9e-15	17	20	52.5	7.2	9.8e-13	16	18	48.7	7.45	3.4e-13	14	14	41.5	8.43	5.3e-15	18	19	61.4	8.84	9.2e-16	18	22	54	9.51	5.2e-17	23	28	57.9	10.23	2.5e-18	15	16	49.3	7.56	2.1e-13	15	16
[503]		WP_038966051.1	17	26	72.6	11.24	3.2e-20	12	16	42.1	9.55	4.4e-17	18	27	67.8	11.73	4.1e-21	16	20	57.9	8.7	1.7e-15	14	18	54.5	12.2	5.5e-22	14	18	49.7	9.18	2.1e-16	16	21	57.2	10.09	4.5e-18	15	19	53.8	10.4	1.2e-18	12	21	41.1	10.47	8.7e-19	12	18
[504]		WP_011087383.1	20	22	32.1	9.58	3.9e-17	16	18	25.3	9.34	1.1e-16	16	18	30.5	9.1	3.1e-16	21	24	41	9.01	4.4e-16	17	19	25.3	6.98	2.5e-12	21	25	35.4	10.29	1.9e-18	18	19	34.8	9.16	2.3e-16	17	20	26.2	10.11	4e-18	14	16	26	9.28	1.4e-16	22	26
[505]		WP_011090638.1	19	22	40.7	8.83	9.8e-16	19	22	32.5	9.67	2.7e-17	23	25	38.3	10.45	9.5e-19	21	24	44	9.99	6.8e-18	18	19	34	6.99	2.5e-12	23	26	42.1	8.81	1.1e-15	20	21	34	9.66	2.8e-17	20	22	32.6	10.53	6.8e-19	20	23	41.1	9.49	5.7e-17	19	22
[506]		WP_011085401.1	18	25	48.9	10.04	5.4e-18	18	21	45.3	9.56	4.3e-17	21	23	48	10.05	5.2e-18	13	17	40.8	7	2.3e-12	19	25	51.4	8.32	8.4e-15	17	23	54.5	9.73	2.1e-17	23	32	60.6	8.99	4.9e-16	19	24	53.1	9.65	2.9e-17	19	23	45.3	9.55	4.5e-17	19	24
[507]		WP_011086860.1	19	22	44.7	7.32	6.1e-13	20	25	44.7	8.9	7.2e-16	22	26	57.4	7.25	8.2e-13	17	19	37.4	7.76	9.3e-14	10	10	23.5	7.39	4.5e-13	14	14	36.7	6.79	5.8e-12	12	13	29.2	6.24	5.9e-11	17	18	43.1	7.04	2e-12	18	24	43.5	9.13	2.7e-16	19	20
[508]		WP_011083626.1	17	21	52.6	11.88	2.1e-21	12	16	30.3	10.41	1.1e-18	16	20	57.1	12.27	4.1e-22	14	16	48	11.85	2.4e-21	9	9	21.6	7.45	1.9e-13	19	21	57.1	11.16	4.7e-20	16	20	47.1	9.64	3.1e-17	13	15	36.9	9.69	2.5e-17	11	13	31.2	10.45	9.7e-19	10	12
[509]		WP_028174472.1	17	27	78.1	9.76	1.8e-17	12	16	50.2	10.46	9.1e-19	15	23	63.8	9.35	1.1e-16	15	19	72.4	9.99	6.9e-18	13	15	46.2	9.62	3.2e-17	15	20	65.2	10.16	3.4e-18	13	17	68.1	10.16	3.4e-18	16	20	75.6	10	6.6e-18	12	18	60.2	10.84	1.8e-19	15	22
[510]		WP_011083989.1	20	26	47.7	9.82	1.4e-17	16	20	41.9	8.94	6.1e-16	17	23	41.9	11.09	6.2e-20	20	26	46.6	11.08	6.6e-20	15	18	38	7.79	8.2e-14	14	17	32.3	10.69	3.5e-19	16	22	38	9.34	1.1e-16	17	23	41.9	9.37	9.5e-17	15	22	42.7	8.14	1.9e-14	17	24
[511]		WP_063921560.1	18	22	53.2	10.27	2e-18	14	19	41.2	10.23	2.4e-18	12	14	37.6	10.1	4.2e-18	14	15	39.7	8.89	7.5e-16	12	14	44.4	8.96	5.4e-16	17	21	44.7	10.65	4.1e-19	16	19	42.6	9.87	1.1e-17	14	15	56.8	11.24	3.3e-20	15	19	41.5	10.16	3.3e-18	15	17
[512]		WP_236842253.1	21	27	52.9	11.41	1.6e-20	19	24	51.5	8.21	1.4e-14	23	30	53.2	8.26	1.1e-14	23	28	57.9	10.22	2.5e-18	21	25	52.9	8.76	1.3e-15	25	29	53.2	8.71	1.6e-15	20	25	52.9	7.84	6.6e-14	19	25	47.8	8.47	4.5e-15	22	31	54.5	10.11	4e-18	20	24
[513]		WP_038967137.1	21	21	35.9	6.93	3.2e-12	18	20	31.7	7.45	3.4e-13	21	22	38	6.98	2.6e-12	20	21	36.2	7.88	5.5e-14	24	26	32.2	7.53	2.4e-13	17	19	28.2	7.72	1.1e-13	22	24	33.2	7.13	1.4e-12	21	23	39.3	8.18	1.5e-14	18	19	29.8	6.87	4.2e-12	20	20
[514]		WP_011088183.1	19	25	42.4	6.7	8.3e-12	21	28	44.9	7.07	1.8e-12	23	30	52.1	9.95	8e-18	21	25	43.9	7.31	6.2e-13	18	22	34.9	7.62	1.7e-13	23	30	51.1	7.96	3.9e-14	18	25	40.6	6.95	2.9e-12	21	28	46.1	7.17	1.1e-12	19	27	43.9	11.95	1.6e-21	21	29
[515]		WP_011085551.1	21	29	57.6	11.17	4.4e-20	18	24	45.5	8.53	3.4e-15	19	26	57.6	9.49	5.8e-17	22	27	54.8	9.94	8.4e-18	19	21	57.6	6.67	9.4e-12	22	31	49.7	7.31	6.4e-13	19	24	57.6	9.96	7.7e-18	18	24	49.7	9.19	2e-16	19	27	57.6	10.4	1.2e-18	21	29
[516]		WP_011085615.1	19	22	51.5	8.03	3e-14	20	23	56.2	6.74	7e-12	19	23	47.5	8.82	1e-15	21	22	50.7	10.3	1.8e-18	17	18	44.8	9.66	2.8e-17	21	27	56.7	10.93	1.2e-19	18	24	52	10.95	1.2e-19	24	28	56.4	8.42	5.6e-15	19	22	56.9	10.66	4e-19	18	23
[517]		WP_011089427.1	21	25	52.8	10.04	5.6e-18	17	19	43.4	11.13	5.3e-20	19	24	52.8	8.99	4.8e-16	19	23	47.5	9.6	3.6e-17	20	22	52.8	7.62	1.6e-13	20	25	52.8	10.23	2.5e-18	20	23	47.8	9.68	2.6e-17	20	22	52.8	9.21	1.9e-16	20	25	52.8	9.66	2.8e-17	21	25
[518]		WP_011085279.1	18	27	72.4	11.89	2e-21	12	17	49.2	8.54	3.3e-15	14	23	53.2	8.54	3.3e-15	11	18	45.6	8.7	1.7e-15	13	17	53.2	7.75	9.6e-14	16	26	67.6	9.75	1.9e-17	17	23	61.6	10.28	2e-18	20	25	72.4	12.9	2.8e-23	16	26	63.2	12.58	1.1e-22	12	19
[518-1]	14	WP_011084600.1	14	22	69.9	11.89	2e-21	8	10	35.3	6.93	3.2e-12	11	15	44.2	7.14	1.3e-12	11	13	39.4	6.4	3e-11	11	15	43.4	7.19	1e-12	13	17	53.4	8.12	2e-14	12	14	44.2	7.63	1.6e-13	11	14	48.2	12.9	2.8e-23	12	15	53	12.58	1.1e-22	12	18
[519]		WP_011083611.1	18	23	52.7	8.46	4.6e-15	19	26	54	8.69	1.7e-15	18	23	50.6	10.32	1.7e-18	18	21	54.5	7.8	7.8e-14	14	18	38.2	7.96	3.9e-14	19	25	54.5	8.14	1.8e-14	17	24	54	9.87	1.1e-17	17	22	50.6	7.81	7.5e-14	20	26	55.1	9.39	9e-17	19	25
[520]		WP_011085838.1	20	21	35.7	7.92	4.6e-14	22	26	26.9	9.13	2.6e-16	18	22	28.1	8.44	5e-15	23	25	37.3	7.85	6.2e-14	16	16	24.1	7.27	7.5e-13	22	26	36.4	8.39	6.2e-15	21	26	28.8	8.46	4.7e-15	21	25	31.5	9.21	1.9e-16	17	22	28.8	8.47	4.4e-15	22	26
[521]		WP_011087826.1	16	16	22.2	7.5	2.8e-13	25	28	36.7	7.93	4.4e-14	20	23	25.5	7.41	4e-13	20	21	25.9	7.36	5e-13	15	15	22.3	7.52	2.6e-13	18	20	23.5	7.63	1.6e-13	18	19	26	7.4	4.2e-13	20	22	32.7	7.57	2e-13	23	24	31.2	7.94	4.3e-14	19	22
[522]		WP_028171284.1	20	28	42.1	9.27	1.5e-16	16	21	41.4	8.04	2.8e-14	20	27	42.4	7.7	1.2e-13	16	17	36.2	7.69	1.2e-13	21	22	38.7	8.25	1.2e-14	18	23	39.7	9.35	1e-16	20	26	42.1	8.5	3.9e-15	20	24	40.1	8.31	8.9e-15	18	24	40.6	7.61	1.7e-13	17	21
[523]		WP_038967384.1	18	19	29.9	6	1.6e-10	24	24	35.5	6.99	2.4e-12	21	21	32.2	6.99	2.4e-12	18	18	31.2	7.11	1.5e-12	16	16	27.7	6.52	1.8e-11	17	17	28.1	6.96	2.8e-12	20	20	33.1	6.81	5.2e-12	20	20	35	8.46	4.5e-15	24	24	38.3	7.4	4.3e-13	21	22
[524]		WP_011083687.1	19	21	17.9	11.76	3.5e-21	23	24	21.4	11.25	3.1e-20	24	25	20.7	8.69	1.8e-15	19	19	18.8	7.24	6.9e-13	18	18	16.8	5.1	1.2e-10	24	25	24	10.06	5.1e-18	20	20	18.4	11.74	3.9e-21	22	24	20.4	10.25	2.2e-18	24	25	20.4	6.94	3.1e-12	21	22
[525]		WP_011087730.1	15	27	53.1	9.54	4.7e-17	17	30	59.2	9.5	5.6e-17	15	28	52.8	8.72	1.5e-15	11	17	27.5	9.65	2.9e-17	13	16	46.9	8.3	9e-15	15	26	52.8	10.1	4.3e-18	15	24	52.3	9.08	3.3e-16	16	27	53.5	9.42	7.8e-17	16	24	53.3	9.48	6.1e-17	14	24
[526]		WP_011086538.1	14	16	43.7	6.33	4e-11	18	21	36.8	8.39	6.2e-15	16	22	43.7	7.43	3.8e-13	19	23	50.9	8	3.3e-14	20	23	49.1	9.28	1.4e-16	23	28	42.4	9.08	3.3e-16	20	27	46.8	8.67	1.9e-15	22	27	40.7	7.85	6.3e-14	14	19	37.7	7.73	1e-13	17	23
[527]		WP_011089499.1	19	21	50.5	6.94	3e-12	17	19	37.8	9.18	2.1e-16	22	23	47.3	6.79	5.8e-12	20	21	42.1	7.2	1e-12	19	21	39.8	7.02	2.2e-12	21	23	43.3	7.12	1.4e-12	24	26	55.5	6.66	1e-11	22	23	50.9	7.12	1.4e-12	23	24	45.7	7.83	6.8e-14	22	24
[528]		WP_011085184.1	16	18	37.3	8.62	2.3e-15	16	20	37.7	7.76	9.4e-14	13	15	31.4	8.64	2.1e-15	21	22	43.8	8.76	1.3e-15	16	17	30.9	6.72	1.7e-12	19	20	39.9	9.67	2.7e-17	18	19	44.9	8	3.3e-14	12	14	28.7	6.88	3.9e-12	18	22	46.6	9.92	9.2e-18	19	20
[529]		WP_011090191.1	21	22	42.9	7.41	4.1e-13	20	24	49.2	8.2	1.4e-14	17	18	38.3	7.5	2.7e-13	18	18	40.5	7.26	7.9e-13	20	21	42.9	7.01	2.2e-12	21	23	44.7	7.46	3.4e-13	21	23	44.7	7.49	2.8e-13	21	23	43.3	8.7	1.7e-15	18	20	41.1	8.05	2.7e-14	21	22
[530]		WP_011090193.1	19	25	49.7	7.46	3.3e-13	19	25	45.8	7.41	4.1e-13	21	28	40.3	7.42	3.9e-13	21	27	41.9	7.18	1.1e-12	20	23	46.9	7.89	5.2e-14	22	28	50	7.45	3.4e-13	21	26	46.1	8.25	1.2e-14	20	26	46.1	7.33	5.9e-13	20	26	45.8	7.4	4.2e-13	21	25
[531]		WP_011090891.1	17	23	55.5	9.79	1.6e-17	14	17	45.6	9.17	2.3e-16	18	23	64.7	10.42	1.1e-18	18	21	57.4	9.37	9.8e-17	15	18	43.8	8.78	1.2e-15	19	24	74.3	9.98	7e-18	15	21	53.7	8.52	3.5e-15	17	20	59.2	9.91	9.4e-18	16	22	55.5	10.23	2.4e-18	17	23
[532]		WP_011090239.1	21	24	40.2	7.25	8.2e-13	25	29	48.4	8.86	8.3e-16	22	27	41.7	6.47	2.3e-11	18	22	31	10.36	1.4e-18	16	20	33.4	7.45	3.4e-13	23	27	43.7	9.8	1.5e-17	22	28	48.3	10.99	9.7e-20	19	24	41.3	10.27	2.1e-18	22	27	43.3	7.5	2.7e-13	20	24
[533]		WP_011088711.1	23	29	39.3	7.28	7e-13	18	22	35.8	7.55	2.3e-13	20	28	38.4	8.92	6.6e-16	17	23	38.9	9.32	1.2e-16	18	22	35.4	5.49	1.5e-09	22	30	48	8.68	1.8e-15	21	28	43.9	10.16	3.3e-18	20	27	38.6	9.37	9.4e-17	18	25	42.1	6.67	9.7e-12	17	22
[534]		WP_011086742.1	18	19	34.3	9.13	2.7e-16	19	22	33	8.52	3.6e-15	17	20	36.7	9.17	2.2e-16	21	22	44.6	6.18	7.7e-11	21	22	40.6	6.57	1.4e-11	25	27	42.6	8.75	1.4e-15	19	22	38.5	9.3	1.3e-16	19	19	32.3	8.99	4.8e-16	18	19	33.3	8.84	9.1e-16	19	22
[535]		WP_011088157.1	19	21	38.9	11.97	1.4e-21	16	19	23.2	7.03	2.1e-12	18	20	31.6	12.22	5.2e-22	16	18	29.2	9.15	2.4e-16	14	15	26.8	7.53	2.5e-13	12	14	21.1	8.02	3e-14	17	17	27.7	11.72	4.3e-21	20	21	31.6	13.33	4.4e-24	17	19	30.5	7.87	5.7e-14	16	18
[536]		WP_011088926.1	17	23	56.6	9.94	8.5e-18	20	26	66.5	9.19	2.1e-16	19	25	54.8	9.71	2.3e-17	20	24	66.9	8.23	1.3e-14	13	14	47.3	6.71	8.2e-12	16	20	66.5	7.96	3.9e-14	17	20	51.6	7.84	6.5e-14	13	15	54.8	8.5	3.9e-15	15	21	58.4	11.36	2e-20	20	24
[537]		WP_162494046.1	20	27	52.5	9.36	9.9e-17	15	20	50	8.43	5.3e-15	16	20	38.1	8.32	8.5e-15	14	17	40.7	8.52	3.6e-15	13	15	28.8	7.59	1.9e-13	14	20	42.7	8.88	7.6e-16	15	21	40.4	8.75	1.3e-15	18	24	46.5	9.66	2.8e-17	16	21	47.5	8.16	1.7e-14	17	23
[538]		WP_011085060.1	15	27	39.5	9.72	2.2e-17	13	18	36.8	10.3	1.8e-18	17	29	45.1	9.99	6.7e-18	15	23	35.5	8.42	5.6e-15	13	14	35.5	10.07	4.8e-18	15	19	35.9	9.85	1.3e-17	15	22	44.6	9.57	4.1e-17	13	20	37.9	8.7	1.7e-15	16	29	50.4	9.92	9.1e-18	15	21
[539]		WP_028175820.1	19	28	58.4	9.85	1.2e-17	13	18	29.8	9.16	2.3e-16	18	24	50.6	9.26	1.6e-16	13	18	28.6	8.95	5.7e-16	17	22	43.1	8.88	7.6e-16	18	27	48.8	8.98	5.1e-16	15	22	47.6	9.82	1.4e-17	16	24	34.9	9.06	3.7e-16	16	27	49.4	9.93	8.8e-18	14	20
[540]		WP_038965654.1	18	21	60.7	11	9.2e-20	13	17	45.5	7.55	2.3e-13	17	20	56.2	9.28	1.4e-16	17	18	54	7.46	3.4e-13	16	18	47.7	6.51	1.9e-11	20	22	64.4	9.29	1.4e-16	21	25	65	10.29	1.9e-18	18	20	59.9	9.15	2.4e-16	19	22	59.9	9.49	5.8e-17	16	19
[541]		WP_011085905.1	18	28	73.7	11.14	5e-20	14	21	49.1	8.62	2.4e-15	15	21	71.4	10.1	4.2e-18	13	19	48.2	9.11	2.9e-16	15	16	61.6	9.1	3.1e-16	14	16	65.6	7.45	3.5e-13	15	20	65.6	11.12	5.6e-20	13	16	48.2	9.28	1.4e-16	15	21	65.6	8.48	4.2e-15	15	18
[542]		WP_011089242.1	18	24	63.5	9.42	7.8e-17	16	19	54.9	5.46	1.7e-09	22	28	64.7	10.84	1.8e-19	17	21	44.5	7.95	4e-14	15	19	47.9	8.34	7.8e-15	22	29	69.6	10.04	5.6e-18	15	22	51.2	8.92	6.6e-16	18	26	53.4	10.82	2e-19	20	26	61	8.7	1.6e-15	17	22
[543]		WP_011087357.1	18	22	52	7.26	7.6e-13	17	23	48.2	7.82	7.2e-14	17	22	53.3	8.21	1.3e-14	17	22	42.4	8.02	3e-14	21	23	52.3	9.35	1e-16	17	23	45.4	9.27	1.5e-16	20	24	62.9	8.42	5.5e-15	19	25	59.6	7.98	3.6e-14	17	22	52.3	8.03	2.9e-14	17	21
[544]		WP_011088371.1	18	40	83.7	8.96	5.4e-16	15	28	83.7	7.78	8.4e-14	18	35	94.2	8.44	5e-15	16	28	83.7	9.03	4.1e-16	12	14	83.7	8.12	2e-14	15	26	83.7	8.94	6e-16	16	32	83.7	9.34	1.1e-16	16	29	83.7	8.6	2.6e-15	18	41	83.7	9.28	1.4e-16	16	37
[544-1]	8	WP_011090264.1	11	26	74.5	7.34	5.5e-13	10	23	67.3	6.91	3.5e-12	13	28	78.6	7.27	7.4e-13	11	20	67.3	6.35	3.7e-11	10	12	67.3	5.58	9.8e-10	10	17	67.3	6.45	2.4e-11	12	27	74.5	7.34	5.5e-13	9	20	67.3	8.1	2.1e-14	12	31	74.5	6.6	1.3e-11	13	32
[544-2]	5	WP_011089716.1	7	8	67.3	6.26	5.6e-11	3	4	22.1	5.73	5.3e-10	3	4	26	5.3	2.7e-09	3	4	22.1	4.58	1.2e-08	2	2	15.4	5.06	9e-09	4	5	33.7	5.02	7.1e-09	4	5	33.7	6.01	1.6e-10	3	4	22.1	5.85	3.2e-10	5	7	38.5	6.01	1.6e-10	5	7
[544-3]	4	WP_028171493.1	4	10	44.2	8.21	1.4e-14	3	5	28.8	6.91	3.5e-12	4	8	43.3	6.61	1.2e-11	3	5	28.8	7.31	6.4e-13	2	2	28.8	6.77	6.2e-12	3	6	28.8	6.1	1.1e-10	3	5	28.8	7.24	8.3e-13	3	5	28.8	6.68	9.3e-12	3	7	28.8	8.2	1.4e-14	5	10
[545]		WP_011082969.1	17	23	62.5	10.46	9e-19	12	14	49	11.64	5.9e-21	14	18	58.2	11.36	2e-20	15	16	50.6	12.03	1.1e-21	13	14	42.9	10.01	6.4e-18	17	19	51	10.95	1.1e-19	18	21	67.4	11.22	3.6e-20	16	18	62.5	12.12	7.8e-22	15	19	58.2	11.96	1.5e-21	15	15
[546]		WP_011085787.1	19	23	58.9	9.13	2.6e-16	13	15	44.3	8.71	1.6e-15	13	15	43.5	8.16	1.6e-14	21	22	63.9	8.81	1e-15	16	16	45.7	7.54	2.3e-13	18	20	57.9	8.55	3.2e-15	19	20	55.3	7.58	2e-13	19	20	59.8	8.61	2.5e-15	15	17	41.6	8.26	1.1e-14	15	16
[547]		WP_038965237.1	17	19	45.3	9.64	3.1e-17	17	17	44.4	7.71	1.1e-13	20	24	60.1	10.59	5.3e-19	15	16	39	6.27	5.2e-11	17	18	45.5	6.89	3.7e-12	15	16	47.6	8.28	1e-14	18	19	50	7.44	3.7e-13	15	17	39.4	10.16	3.3e-18	18	21	51.3	10.16	3.4e-18	19	21
[548]		WP_011088437.1	15	20	47.9	8.47	4.5e-15	15	19	35.1	7.75	9.6e-14	16	20	33.6	7.92	4.6e-14	16	21	42.8	8.69	1.8e-15	16	16	38.7	8.54	3.3e-15	16	21	52.6	8.63	2.2e-15	20	26	44.1	8.96	5.4e-16	21	28	52.6	8.8	1.1e-15	19	23	57.2	8.23	1.2e-14	18	23
[549]		WP_011088131.1	17	22	50	12.41	2.2e-22	11	16	48.6	11.42	1.5e-20	14	20	55.1	11.38	1.8e-20	12	17	50	8.99	4.8e-16	13	19	37.7	12.57	1.1e-22	17	24	50	11.21	3.8e-20	18	24	50	10.47	8.7e-19	13	18	35.5	9.77	1.7e-17	15	21	53.6	9.19	2.1e-16	14	17
[550]		WP_011087080.1	16	18	22.8	8	3.4e-14	25	27	31.1	8.25	1.2e-14	23	26	28.1	9.55	4.5e-17	23	25	28.6	8.45	4.8e-15	13	13	17.8	9.04	4e-16	11	11	15	7.27	9.8e-14	7	7	10.7	6.48	1.6e-12	6	6	9.7	8.11	2e-14	21	23	27.2	8.6	2.6e-15	24	24
[550-1]	1	decoy						1	1	1.6	1.56	6e-05	1	1	1.6	1.64	4.9e-05																					1	1	2.2	-0.05	0.0001
[551]		WP_011086908.1	19	26	53.9	8.19	1.4e-14	18	25	47.9	8.05	2.7e-14	22	29	50.3	9.33	1.1e-16	18	23	42.1	7.76	9e-14	18	25	50.5	7.41	4.2e-13	20	28	51.8	7.7	1.2e-13	17	22	46.3	8.36	7e-15	21	30	55.5	9.09	3.1e-16	19	26	51.3	9.7	2.3e-17	18	26
[552]		WP_011083495.1	21	28	58.6	9.22	1.8e-16	22	30	51.6	6.57	1.5e-11	23	34	62.7	7.87	5.7e-14	19	22	47.5	7.32	5.9e-13	18	21	50.6	6.05	1.4e-10	22	27	51.9	8.82	9.9e-16	23	31	62.7	7.39	4.4e-13	22	28	44.6	9.28	1.4e-16	24	34	56.7	8.69	1.8e-15	22	26
[553]		WP_011090256.1	16	19	42.8	8.85	8.7e-16	14	14	38.4	10.06	5.1e-18	14	15	39.4	8.68	1.8e-15	12	12	33.9	8.21	1.3e-14	14	14	37.6	7.9	5e-14	15	15	40.5	8.61	2.5e-15	15	17	39.7	8.85	9e-16	21	21	46.7	9.02	4.3e-16	15	16	35.2	8.69	1.8e-15	18	18
[554]		WP_011087426.1	16	19	38.5	10.2	2.7e-18	18	21	41.4	8.58	2.8e-15	16	21	42.3	9.15	2.5e-16	14	16	32.4	7.47	3.2e-13	8	10	19.4	7.51	2.6e-13	15	18	36.3	8.18	1.5e-14	15	16	34	8.71	1.6e-15	15	19	36	10.59	5.2e-19	14	19	37.6	10.42	1.1e-18	16	19
[555]		WP_011085249.1	17	18	39.3	9.04	3.9e-16	14	14	26.3	8.25	1.1e-14	18	20	39.6	9.12	2.8e-16	16	17	33.9	7.79	8.2e-14	9	10	14.6	6.33	4e-11	14	15	27.8	7.36	5.1e-13	15	16	33.8	8.86	8.5e-16	15	16	29.8	8.46	4.7e-15	17	19	28.1	9.36	1e-16	17	17
[556]		WP_011086319.1	13	15	61.2	10.42	1.1e-18	18	23	63.4	10.73	2.8e-19	17	23	67.5	10.29	1.9e-18	15	18	66.4	9.93	8.7e-18	7	7	35.8	6.59	6.7e-13	12	13	54.1	6.42	2.8e-11	8	9	39.2	8.34	7.7e-15	10	11	45.9	7.07	1.7e-12	12	14	54.1	7.65	1.5e-13	14	16
[557]		WP_011085274.1	20	27	67.4	12.62	9.2e-23	15	17	58	9.77	1.7e-17	14	20	61.6	11.51	1.1e-20	15	21	58	10.37	1.4e-18	15	16	55.4	8.37	6.8e-15	14	19	37.9	10.34	1.5e-18	15	21	67	11.22	3.7e-20	13	16	56.7	12.22	5e-22	16	21	67.4	11.16	4.6e-20	13	19
[558]		WP_011083007.1	18	22	59.7	8.59	2.7e-15	18	20	52.4	8.57	2.9e-15	19	21	47.8	8.03	2.9e-14	19	21	50.8	8.27	1e-14	13	13	41.1	8	3.3e-14	23	26	55.1	8.11	2.1e-14	21	22	53	7.96	3.8e-14	20	22	57.8	8.94	5.9e-16	18	24	54.6	8.7	1.7e-15	18	21
[559]		WP_011085546.1	22	34	63.2	10.76	2.6e-19	15	17	37.2	6.69	8.8e-12	17	24	47.7	6.45	2.5e-11	18	22	59.6	7.17	1.1e-12	15	16	48.7	6.88	3.9e-12	18	23	54.2	10.35	1.5e-18	15	19	41.5	11.03	8.1e-20	16	22	39.4	6.48	2.1e-11	17	23	51.3	6.8	5.5e-12	19	22
[560]		WP_011086598.1	15	19	44	9.19	2e-16	12	12	43	8.86	8.3e-16	14	16	43	8.34	7.7e-15	12	14	43	8.21	1.3e-14	10	11	43	9.88	1.1e-17	17	20	44	9.65	2.9e-17	13	16	43	9.85	1.2e-17	16	17	44	11.11	5.8e-20	12	14	41.5	8.75	1.3e-15	13	16
[561]		WP_011083078.1	14	16	39.3	8.01	3.2e-14	13	13	36.1	9.37	9.7e-17	15	19	39.5	8.77	1.2e-15	13	14	31.9	7.69	1.2e-13	12	12	35.3	5.93	2.2e-10	16	16	43.9	7.86	6e-14	15	16	36.8	8.7	1.6e-15	15	17	38.5	8.59	2.7e-15	20	21	49.4	8.47	4.4e-15	13	13
[562]		WP_038967714.1	23	27	32.2	7.47	3.2e-13	22	26	28.2	8.22	1.3e-14	23	29	34.1	7.89	5.2e-14	22	23	29.2	6.68	9.4e-12	19	22	24	7.51	2.6e-13	19	24	22.3	7.18	1.1e-12	21	25	27.3	6.76	6.6e-12	18	20	26.3	7.68	1.3e-13	20	21	27	7.49	3e-13	20	25
[563]		WP_063921554.1	16	18	57.2	9.69	2.5e-17	15	18	45.7	8.08	2.4e-14	15	17	46	8.51	3.7e-15	15	19	40.7	7.84	6.6e-14	11	13	40.4	7.65	1.5e-13	19	23	57.5	9.23	1.7e-16	15	18	41	8.21	1.4e-14	15	16	52.2	8.43	5.2e-15	17	22	57.5	8.59	2.6e-15	16	19
[564]		WP_038966155.1	14	16	37.2	6.91	3.4e-12	19	20	52.4	6.47	2.2e-11	18	21	43.5	7.35	5.3e-13	16	17	37.4	7.12	1.4e-12	9	9	21.3	6.32	7.8e-12	15	15	40.7	7.05	1.9e-12	15	17	41.1	7.16	1.2e-12	22	24	47.6	7.23	8.9e-13	17	17	46.7	7.73	1e-13	17	18
[564-1]	1	WP_011089027.1	2	2	2.2	4.98	3.7e-09	4	4	7.2	4.91	2.3e-09	3	3	4.3	4.71	8.7e-09	3	3	4.3	5.76	3.7e-10	2	2	2.2	4.69	2.8e-09	2	2	2.2	4.65	3.3e-09	3	3	5	5.24	4.2e-09	4	4	7.2	3.79	5.3e-08	2	2	2.2	4.97	4.4e-09	3	3
[565]		WP_028174674.1	15	22	51.4	10.43	1e-18	13	18	49.5	9.05	3.8e-16	15	22	50.5	10.09	4.4e-18	17	22	60.3	9.01	4.5e-16	11	13	37.5	7.4	4.2e-13	13	24	42	9.12	2.7e-16	14	22	42	10.36	1.4e-18	15	23	54.9	9.92	9e-18	14	21	50.5	11.82	2.8e-21	15	21
[566]		WP_008974302.1	19	23	61.6	8.4	6e-15	14	15	33.7	9.19	2.1e-16	20	22	62.7	8.86	8.3e-16	14	15	46.3	7.83	6.9e-14	15	16	48.6	7.63	1.6e-13	18	20	53.7	9.38	9.3e-17	21	23	57.6	8.99	4.9e-16	15	17	49	9.13	2.7e-16	17	21	54.1	7.76	9.1e-14	17	19
[567]		WP_011086533.1	14	14	47.1	9.43	7.3e-17	14	15	41.3	8.65	2.1e-15	16	16	50	8.44	5.1e-15	11	11	36.6	8.09	2.3e-14	12	12	34.3	6.29	2e-11	13	13	41	7.39	4.4e-13	15	17	46.5	10.87	1.6e-19	17	18	54.1	11.66	5.5e-21	17	19	49.4	10.01	6.3e-18	11	12
[568]		WP_011090487.1	14	18	26	10.88	1.5e-19	12	16	26	9.34	1.1e-16	14	19	34	10.23	2.4e-18	16	23	32.7	9.97	7.3e-18	14	18	22.1	9.34	1.1e-16	19	25	39.8	11.94	1.6e-21	15	20	37.5	11.07	6.7e-20	16	22	29	10.56	5.9e-19	15	18	27.5	11.05	7.4e-20	18	25
[569]		WP_011088087.1	16	24	42.9	12.4	2.4e-22	14	18	42.6	8.64	2.2e-15	16	24	42.6	12.55	1.2e-22	15	19	39.7	12.74	5.5e-23	13	15	38.2	12.47	1.7e-22	16	23	39.4	12.45	1.9e-22	17	23	42.6	8.21	1.3e-14	16	21	42.6	14.07	1.9e-25	16	21	42.9	13.76	7.3e-25	13	16
[570]		WP_011084201.1	17	22	39.7	7.28	7.2e-13	18	21	49.4	8.37	6.7e-15	17	20	43.2	8.68	1.8e-15	18	21	37.8	6.93	3.2e-12	19	21	47.3	10.5	7.6e-19	23	28	54.4	9.48	5.9e-17	19	22	53.4	6.79	5.7e-12	18	22	49.2	6.97	2.7e-12	15	18	46.8	8.83	9.7e-16	18	21
[571]		WP_011087680.1	18	24	77.3	9.12	2.8e-16	13	17	69.5	8.37	6.7e-15	14	19	69.5	8.37	6.7e-15	13	17	64	7.88	5.4e-14	15	16	72.9	8.25	1.1e-14	13	18	60.1	8.87	8e-16	13	20	60.1	9.03	4.1e-16	13	20	66	9.63	3.2e-17	13	14	58.6	7.57	2e-13	15	18
[572]		WP_028170828.1	16	20	58.5	11.7	4.6e-21	16	20	53.2	7.24	8.4e-13	18	25	65.3	10.39	1.2e-18	18	22	59.8	10.39	1.3e-18	13	16	43.4	7.97	3.7e-14	18	20	64	8.78	1.2e-15	16	22	59.5	9.47	6.3e-17	21	27	59.3	8.98	5e-16	13	18	50.8	9.38	9.3e-17	15	20
[573]		WP_011088136.1	19	42	60.2	10.76	2.6e-19	18	24	59.6	9.03	4.1e-16	16	28	59.6	8.98	5e-16	16	26	60.2	7.24	8.3e-13	16	19	54	8.42	5.6e-15	19	32	60.2	7.43	3.7e-13	19	30	64.6	10.77	2.5e-19	17	32	59.6	10.83	1.9e-19	17	35	59.6	8.96	5.4e-16	18	31
[574]		WP_011088405.1	18	19	36.9	7.11	1.5e-12	20	23	33.3	6.54	1.7e-11	22	26	44.2	8.3	9.1e-15	24	28	46.3	7.5	2.8e-13	20	22	37.6	6.81	5.3e-12	25	28	51.3	6.9	3.6e-12	16	20	33.3	7.29	6.8e-13	22	26	45.1	7.24	8.3e-13	21	24	39.3	7.19	1e-12	20	23
[575]		WP_038965471.1	19	24	78.7	9.71	2.2e-17	17	20	60.1	7.78	8.6e-14	17	23	58.5	7.86	6e-14	17	22	59.6	8.28	1e-14	12	13	37.7	5.53	1.2e-09	21	25	68.6	10.24	2.3e-18	19	25	56.8	8.85	8.8e-16	20	25	74	8.15	1.7e-14	18	23	62.3	9.28	1.4e-16	20	26
[576]		WP_011089830.1	20	30	71.9	7.58	2e-13	16	23	58.7	7.43	3.8e-13	18	24	60.9	9.07	3.4e-16	17	20	60.4	7.18	1.1e-12	14	16	45.5	8.51	3.8e-15	18	23	55.3	7.82	7.1e-14	17	23	55.3	7.31	6.3e-13	18	23	56.2	7.53	2.4e-13	18	23	58.7	7.15	1.2e-12	18	22
[577]		WP_011089435.1	14	16	30.8	9.67	2.7e-17	15	18	25.7	9.64	3e-17	16	18	34.7	8.77	1.2e-15	17	19	32.7	9.95	8.1e-18	12	12	29	6.72	7.8e-12	15	18	33.6	10.57	5.8e-19	17	19	43.8	9.53	4.9e-17	13	14	26.5	8.65	2.1e-15	16	20	31.6	7.62	1.7e-13	17	20
[578]		WP_011087827.1	19	40	52.8	9.63	3.2e-17	14	28	51.4	9.28	1.4e-16	16	33	51.4	8.61	2.4e-15	17	33	51.9	8.83	9.4e-16	12	20	47.2	7.29	6.7e-13	16	32	48.1	8.15	1.7e-14	19	34	53.3	10.04	5.6e-18	19	36	53.3	8.77	1.2e-15	16	34	51.4	8.8	1.1e-15	17	31
[579]		WP_028173645.1	19	22	42.6	9.03	4.1e-16	14	15	36.1	9.26	1.5e-16	21	23	51.4	8.64	2.1e-15	19	20	47	8.61	2.4e-15	20	21	46.5	8.82	9.9e-16	20	22	48.2	8.51	3.8e-15	19	20	46.8	9.65	2.8e-17	18	19	48.2	8.92	6.5e-16	17	21	42.8	9.59	3.8e-17	18	20
[580]		WP_011087069.1	16	20	46.1	7.45	3.4e-13	15	20	44.1	6.59	1.3e-11	20	25	51.4	9.46	6.5e-17	16	19	46.1	8.79	1.2e-15	13	14	37	8.72	1.5e-15	18	25	45.1	9.44	7.1e-17	15	18	41.8	6.84	4.6e-12	20	24	50.9	7.53	2.4e-13	16	22	45.6	7.7	1.2e-13	13	15
[581]		WP_027547672.1	20	31	58.7	8.94	6e-16	12	17	53.3	8.33	8e-15	17	27	54.7	8.38	6.4e-15	11	11	42.2	9.26	1.5e-16	14	15	51.1	8.44	5.2e-15	17	23	58.7	8.19	1.5e-14	13	18	54.2	7.84	6.6e-14	15	19	54.7	7.91	4.8e-14	16	20	51.1	8.68	1.8e-15	16	23
[582]		WP_011087113.1	17	21	44.7	9.93	8.7e-18	13	15	35.5	9	4.7e-16	19	22	46.1	9.78	1.7e-17	17	21	47.7	9.58	3.9e-17	16	20	44.2	9.5	5.6e-17	16	21	50.2	9.86	1.2e-17	14	18	34.3	10.26	2.1e-18	17	22	47.2	8.74	1.4e-15	15	21	34.3	9.19	2.1e-16	16	20
[583]		WP_038966085.1	17	19	21	8.5	4e-15	20	24	42.4	9.69	2.4e-17	17	20	29.3	9.01	4.4e-16	16	19	21.3	7.49	2.9e-13	11	12	19.2	8.82	9.8e-16	19	21	22.6	8.68	1.8e-15	16	18	22.3	7.86	6e-14	17	22	34.3	8.85	8.8e-16	15	19	30.6	9.89	1.1e-17	19	23
[584]		WP_038966102.1	19	21	56.3	9.2	1.9e-16	21	24	53.2	9.85	1.2e-17	20	22	62.4	8.64	2.1e-15	16	16	45.9	7.71	1.1e-13	17	17	56.8	6.33	4e-11	22	24	57.6	8.65	2e-15	18	22	49.5	9.5	5.5e-17	20	20	60.5	7.79	8.1e-14	21	23	56.1	8.82	1e-15	20	22
[585]		WP_011083768.1	17	25	61.2	11.29	2.7e-20	10	16	38.1	9.7	2.3e-17	17	24	53.7	8.49	4e-15	12	17	35.8	8.43	5.3e-15	13	16	40.4	7.85	6.2e-14	15	21	42.3	10.45	9.6e-19	15	22	48.9	9.57	4e-17	14	20	47.6	8.12	2e-14	12	16	41	9.13	2.6e-16	12	16
[586]		WP_011086659.1	13	16	32.9	7.71	1.1e-13	14	20	27.3	7.24	8.5e-13	15	20	34.6	8.36	7.1e-15	20	24	49.2	8.1	2.2e-14	11	12	32	7.08	1.7e-12	16	19	36.1	9.02	4.3e-16	18	23	48.2	9.64	3e-17	17	22	33.3	7.54	2.4e-13	15	21	38.5	9.56	4.3e-17	14	18
[587]		WP_011083589.1	15	21	61.6	10.82	2e-19	14	18	61.9	10.69	3.5e-19	13	17	57.7	9.73	2.1e-17	20	23	76.3	10.7	3.3e-19	17	18	65.5	10.09	4.4e-18	19	21	67.6	9.83	1.3e-17	16	23	70.3	10.56	5.9e-19	18	23	67	10.54	6.5e-19	14	18	61.6	10.74	2.8e-19	16	19
[588]		WP_011090165.1	16	17	21.3	8.28	1e-14	18	19	23.3	8.58	2.7e-15	20	21	24.1	8.95	5.7e-16	22	23	27	8.79	1.1e-15	18	19	23.7	8.3	9.2e-15	21	22	28.9	7.38	4.6e-13	22	23	28	8.73	1.5e-15	19	21	20.4	8.63	2.2e-15	20	22	23.9	7.45	3.5e-13	14	14
[589]		WP_011085564.1	14	20	43.7	12.08	9.1e-22	13	20	43.4	10.72	3e-19	19	31	64.2	11.92	1.8e-21	17	22	62.8	11.62	6.6e-21	14	16	41.7	8.63	2.3e-15	15	20	46.2	10.89	1.5e-19	14	24	51.3	10.59	5.3e-19	9	14	33.5	11.84	2.6e-21	14	22	49	13.52	2e-24	18	23
[589-1]	1	WP_063921512.1	1	1	1.7	0.14	0.0014	2	3	5.4	1.87	1.6e-06	1	1	1.7	0.29	0.00075	1	1	1.7	0.28	0.0009	1	1	1.7	0.29	0.00087	1	1	1.7	0.16	0.0013	1	1	1.7	0.59	0.0006	1	1	1.7	0.24	0.00091	1	1	1.7	-0.1	0.0018	2	2
[590]		WP_007603030.1	14	40	57.4	10.96	1.1e-19	16	29	64.8	12.2	5.5e-22	16	34	64.8	12.15	7e-22	14	21	60.7	7.82	7e-14	15	17	60.7	8.02	3e-14	16	28	64.8	11.49	1.1e-20	16	35	64.8	12.05	1.1e-21	16	29	64.8	11.45	1.3e-20	14	36	64.8	11.68	5e-21	16	30
[591]		WP_011083904.1	17	20	49.1	11.33	2.2e-20	15	16	30.8	8.31	8.9e-15	16	19	32.1	11.74	3.9e-21	16	17	40.7	10.88	1.5e-19	15	17	33.8	8.46	4.6e-15	18	19	39.4	7.98	3.6e-14	17	19	34.9	8.4	6e-15	15	17	33	9.02	4.3e-16	19	22	47	11.47	1.2e-20	19	22
[592]		WP_011086828.1	23	28	49.1	8	3.3e-14	20	27	36.3	7.82	7.1e-14	21	27	43.9	8.19	1.5e-14	22	25	50.7	10	6.6e-18	20	26	37	8.06	2.6e-14	22	24	39.8	6.88	4e-12	20	27	35.7	7.98	3.6e-14	22	28	45.2	7.92	4.6e-14	18	25	38.5	7.93	4.4e-14	22	25
[593]		WP_011083652.1	15	16	43.6	8.05	2.6e-14	17	18	47.9	8.65	2e-15	16	19	49.1	7.35	5.2e-13	22	24	61.9	8.94	6.1e-16	15	15	40	6.8	2e-12	17	17	49.8	7.36	5e-13	16	16	45.3	9.01	4.4e-16	21	24	53	7.69	1.2e-13	15	18	43.2	6.87	4e-12	14	14
[594]		WP_011088707.1	16	20	39.6	10.55	6.1e-19	15	18	39.6	9.31	1.2e-16	17	22	40.7	10.62	4.6e-19	17	19	46.1	10.12	3.9e-18	10	10	34	6.48	9.5e-13	13	14	33.7	8.58	2.8e-15	16	20	48	11.08	6.4e-20	18	21	41.2	8.79	1.1e-15	14	17	39.6	10.35	1.5e-18	13	15
[595]		WP_011083842.1	16	23	39.1	8.87	8.2e-16	13	17	36.7	8.72	1.6e-15	16	25	40.4	7.7	1.2e-13	11	14	35.9	8.01	3.2e-14	14	18	36.9	8.23	1.2e-14	14	18	36.1	7.98	3.6e-14	15	20	41.7	8.69	1.7e-15	14	21	40.4	7.91	4.8e-14	15	19	39.1	8.4	6e-15	18	24
[596]		WP_028173200.1	16	19	46.1	10.02	5.9e-18	19	25	37	7.31	6.3e-13	15	21	33.7	7.19	1.1e-12	21	27	47.9	9.1	3e-16	20	25	40.1	7.58	1.9e-13	22	28	45.7	8.78	1.2e-15	19	27	39	7.1	1.6e-12	18	27	49.4	8.04	2.8e-14	14	19	32.6	6.81	5.2e-12	16	21
[597]		WP_236842171.1	18	21	58.5	9.43	7.6e-17	14	16	29	7.65	1.5e-13	14	16	43.3	8.94	6.1e-16	12	13	34.8	8.74	1.4e-15	12	13	32	9.46	6.5e-17	15	16	43.3	9.68	2.6e-17	15	17	43	7.48	3.1e-13	13	15	29	9.38	9.3e-17	16	19	47	10.78	2.3e-19	15	16
[598]		WP_038966367.1	18	21	53.1	9.61	3.4e-17	16	18	43.7	8.35	7.4e-15	20	24	55.1	8.9	7.2e-16	13	14	40.8	8.27	1e-14	15	16	39.9	7.33	5.8e-13	18	20	50.4	9.62	3.3e-17	17	19	51.9	8.61	2.5e-15	18	20	54.5	9.22	1.9e-16	14	18	41.9	8.44	5e-15	15	18
[599]		WP_011087192.1	13	13	37.5	9.71	2.3e-17	15	17	34.3	8.2	1.4e-14	13	14	35.8	9.65	2.9e-17	16	16	34.5	8.89	7.3e-16	14	14	36.3	9.16	2.3e-16	18	23	47.9	8.88	7.7e-16	18	21	40.4	9.37	9.7e-17	17	18	40.8	8.53	3.5e-15	15	17	36	8.52	3.5e-15	11	11
[600]		WP_011087559.1	20	25	54.5	7.2	9.9e-13	15	18	38.9	7.11	1.4e-12	20	24	43.4	7.93	4.5e-14	14	17	39.2	8.75	1.3e-15	18	21	41	7.82	7.2e-14	16	21	42.6	8.55	3.2e-15	14	17	38.4	8.07	2.4e-14	16	21	38.9	8.09	2.2e-14	13	15	32.5	5.82	3.5e-10	14	14
[601]		WP_011089420.1	17	25	80.2	8.92	6.6e-16	11	17	64.2	8.47	4.5e-15	14	22	77.2	9.51	5.3e-17	13	19	67.9	8.24	1.2e-14	3	4	19.1	4.77	2.7e-08	11	15	64.2	8.22	1.3e-14	12	21	77.2	7.82	7e-14	14	24	77.8	8.35	7.4e-15	13	21	80.2	7.72	1.1e-13	15	21
[602]		WP_028171094.1	17	21	45.5	10.18	3.1e-18	17	19	46.4	7.43	3.8e-13	15	18	45.5	8.22	1.3e-14	19	23	52.9	9.75	1.9e-17	10	11	33.1	6.26	5e-12	17	19	50	8.05	2.6e-14	17	21	46.1	12.98	2e-23	16	20	52.3	9.31	1.2e-16	17	21	51.6	7.59	1.9e-13	15	17
[603]		WP_063921382.1	18	21	38.1	9.08	3.3e-16	19	21	40.3	7.97	3.7e-14	21	23	42.8	7.42	3.9e-13	20	23	40.7	8.21	1.3e-14	18	20	33.9	7.58	1.9e-13	22	23	48.5	8.16	1.6e-14	19	22	37.9	10.78	2.4e-19	19	22	36.4	9.61	3.5e-17	16	17	37.1	9.09	3.2e-16	19	20
[604]		WP_011087459.1	14	25	80.5	12.61	9.7e-23	10	15	61	11.17	4.4e-20	11	15	77.3	12.73	5.7e-23	11	18	77.9	11.37	1.9e-20	9	12	72.1	9.74	1.9e-17	15	22	80.5	11.18	4.2e-20	12	21	80.5	9.56	4.2e-17	13	19	80.5	11.89	2e-21	12	20	68.2	12.87	3.1e-23	11	16
[605]		WP_038968086.1	15	25	75.3	9.48	6e-17	9	13	54.5	8.71	1.6e-15	11	15	64.3	6.9	3.6e-12	11	16	65.6	9.95	8.3e-18	7	7	50	7	2.3e-12	8	13	59.1	8.7	1.6e-15	12	19	65.6	8.97	5.3e-16	9	14	61	7.77	9e-14	12	22	75.3	9.31	1.2e-16	14	18
[606]		WP_011085661.1	16	17	39	8.45	4.8e-15	13	15	28.4	9.23	1.8e-16	12	16	25.2	8.59	2.7e-15	19	23	40.3	7.39	4.4e-13	10	11	22.8	6.76	6.4e-12	10	12	27.7	8.28	1e-14	15	17	41.4	7.69	1.3e-13	15	15	38.6	9.56	4.2e-17	18	21	42	9.15	2.5e-16	14	17
[607]		WP_038966992.1	17	20	47.4	9.52	5.1e-17	17	20	46.3	9.5	5.4e-17	17	21	48.6	10.26	2.1e-18	17	19	43.6	9.54	4.6e-17	13	14	34.8	7.38	1.5e-13	19	21	47.6	9.46	6.5e-17	20	21	51.9	10.3	1.8e-18	18	19	51.9	8.69	1.7e-15	17	19	44.1	10.17	3.2e-18	18	19
[608]		WP_011088129.1	15	24	59.5	11.01	8.7e-20	9	11	44.3	9.68	2.5e-17	13	15	54.6	11.13	5.3e-20	13	16	53.4	9.12	2.7e-16	13	16	52.3	8.37	6.7e-15	14	18	61.8	9.81	1.4e-17	14	18	54.2	9.62	3.4e-17	13	17	50.4	9.3	1.3e-16	14	17	63.4	9.71	2.2e-17	13	16
[609]		WP_011089996.1	15	15	19.5	6.84	4.6e-12	11	12	13.7	5.76	4.6e-10	13	14	16.2	6.34	3.9e-11	12	12	14.9	6.28	5e-11	21	22	30.8	7.49	2.9e-13	23	24	31.5	7.1	1.5e-12	19	21	26	7.28	7.1e-13	19	23	21.1	7.39	4.5e-13	16	17	18.3	6.59	1.4e-11	14	15
[610]		WP_028175805.1	17	26	45.3	9.07	3.4e-16	12	20	37.8	10.17	3.2e-18	14	22	40.7	10.12	3.9e-18	11	13	39.4	9.07	3.5e-16	7	8	30.3	9.71	2.2e-17	11	12	40.1	8.99	4.9e-16	9	12	35.8	9.35	1e-16	10	14	35.5	9.22	1.8e-16	16	27	43.3	9.92	9.1e-18	14	20
[611]		WP_038965204.1	19	23	46.1	9.91	9.6e-18	17	20	35.8	8.13	1.9e-14	18	20	45.6	8.1	2.2e-14	15	16	36	6.99	2.4e-12	14	15	29.6	7.35	5.4e-13	20	21	44.1	7.73	1.1e-13	18	22	41	8.48	4.2e-15	19	21	45.2	8.14	1.9e-14	17	21	37.4	8.53	3.4e-15	18	21
[612]		WP_011083571.1	13	19	44.1	8.53	3.4e-15	16	22	35.1	9.56	4.2e-17	17	25	49.8	11.19	4e-20	13	17	35.1	6.52	1.8e-11	18	20	48.2	7.92	4.6e-14	18	24	53.4	11.23	3.5e-20	16	23	45.7	11.04	7.7e-20	19	28	48.6	12.04	1.1e-21	15	22	45.7	9.44	7.1e-17	16	19
[613]		WP_011085415.1	19	26	68.6	8.58	2.7e-15	15	19	56.1	8.76	1.3e-15	15	21	54.6	7.52	2.6e-13	16	21	57.2	7.5	2.8e-13	17	21	57.9	8.1	2.2e-14	19	28	60.9	9.17	2.2e-16	16	23	60.9	9.68	2.6e-17	20	27	69	9.94	8.4e-18	14	21	63.1	8.28	1e-14	15	20
[613-1]	19	WP_011083593.1	15	17	52.8	8.42	5.5e-15	13	14	35.5	7.61	1.7e-13	13	13	32.8	7.49	2.9e-13	13	13	46.4	8.25	1.1e-14	16	17	42.3	6.85	4.5e-12	17	18	52.8	7.94	4.3e-14	15	16	46.4	7.82	7.2e-14	17	17	46.4	9	4.7e-16	14	15	52.8	8.36	7.1e-15	10	10
[614]		WP_011090021.1	18	18	40.8	8.12	2e-14	20	21	41.5	7.71	1.1e-13	16	17	36	7.36	5.1e-13	16	17	38.2	8.9	7.2e-16	12	12	23.9	4.29	1.3e-09	14	15	33	7.65	1.5e-13	21	22	53.3	10.1	4.3e-18	20	20	44.1	8.04	2.8e-14	16	18	36	7.55	2.3e-13	14	14
[615]		WP_011086854.1	16	29	57.2	9.56	4.3e-17	7	10	23.5	9.03	4e-16	13	21	53	9.5	5.6e-17	10	14	42.2	9.92	9.1e-18	12	13	57.2	8.97	5.2e-16	11	14	57.2	9.39	8.9e-17	14	22	53	9.34	1.1e-16	14	20	53	10.74	2.8e-19	12	22	53	10.14	3.6e-18	16	23
[616]		WP_011085438.1	19	25	72.2	9.17	2.2e-16	14	17	49.8	8.86	8.4e-16	14	16	61.8	9.03	4.1e-16	12	16	47.6	9.62	3.4e-17	9	12	27.8	7.43	3.7e-13	15	19	58.6	8.48	4.3e-15	15	19	66.3	8.38	6.6e-15	12	16	47.9	9.73	2.1e-17	14	17	58.3	8.68	1.8e-15	14	19
[617]		WP_011087346.1	17	27	39.9	8.25	1.1e-14	19	29	44.4	8.27	1e-14	20	30	48.7	7.76	9.3e-14	19	27	43.5	7.75	9.5e-14	19	24	37.6	8.03	2.9e-14	21	28	44.6	7.59	1.9e-13	19	28	47.4	7.76	9.3e-14	20	33	45.3	7.77	8.9e-14	16	27	33.5	7.59	1.9e-13	18	25
[618]		WP_011083318.1	19	45	71.4	8.68	1.8e-15	12	19	65.1	7.62	1.6e-13	15	31	65.9	7.24	8.4e-13	14	25	60.3	7.64	1.5e-13	14	21	65.9	7.26	7.7e-13	17	29	67.5	8.4	5.9e-15	16	33	65.9	8.1	2.2e-14	15	26	65.9	7.26	7.7e-13	14	36	65.9	8.14	1.8e-14	16	31
[619]		WP_011088740.1	16	21	55.8	9.84	1.3e-17	13	17	39.5	8.12	2e-14	13	17	45.6	9.5	5.4e-17	14	16	49.3	9.52	5.1e-17	12	13	38.8	8.09	2.2e-14	18	20	62.9	9.52	5.1e-17	17	21	56.5	9.28	1.4e-16	15	16	49	9.02	4.3e-16	16	18	51.7	9.8	1.5e-17	16	19
[620]		WP_011087257.1	18	22	50.8	8.92	6.6e-16	17	20	43	8.92	6.4e-16	19	21	51.8	8.78	1.2e-15	16	17	47.2	8.47	4.5e-15	14	14	43.7	7.41	4.1e-13	19	24	49	7.69	1.2e-13	18	23	54	9.99	6.9e-18	20	24	53	8.4	6.1e-15	18	22	46.7	8.19	1.4e-14	16	20
[621]		WP_038967073.1	12	17	45.2	9.87	1.1e-17	13	18	41.3	8.5	3.9e-15	13	17	47.8	10.16	3.3e-18	11	14	46.2	15.58	3e-28	12	15	47.8	10.55	6.2e-19	14	18	44.7	9.64	3.1e-17	16	23	57.7	11.93	1.8e-21	13	19	47.5	8.38	6.5e-15	11	16	41	9.74	2e-17	16	20
[622]		WP_011088350.1	15	20	43.6	9.61	3.5e-17	12	17	40.2	10.23	2.5e-18	17	22	47.3	9.75	1.9e-17	13	17	38.9	10.79	2.2e-19	9	12	31.8	9.24	4.2e-17	12	17	45.9	9.54	4.6e-17	13	19	40.2	10.28	2e-18	12	14	36.8	10.02	6e-18	17	21	42.2	10.74	2.8e-19	14	19
[623]		WP_038965830.1	16	19	39	10.36	1.4e-18	14	17	33.7	10.37	1.4e-18	17	22	54.6	11.03	8e-20	18	21	47.6	11.54	9.4e-21	11	11	25.1	7.56	2.1e-13	17	19	49.6	11.26	3e-20	16	18	40.9	11.37	1.9e-20	17	19	39	10.85	1.8e-19	15	17	40.9	9.26	1.5e-16	15	17
[624]		WP_038967369.1	18	19	32.1	10.13	3.7e-18	16	24	29.6	7.62	1.7e-13	14	16	27.7	8.81	1e-15	17	22	30.5	8.98	5.1e-16	15	18	28.1	8.95	5.9e-16	19	20	34.9	9.87	1.2e-17	21	25	37.8	9.3	1.3e-16	19	21	35.4	8.89	7.5e-16	20	25	37.6	8.43	5.3e-15	17	18
[625]		WP_063921381.1	16	18	22.1	8.96	5.6e-16	13	14	15.4	9.47	6.2e-17	13	14	16.6	7.35	5.2e-13	22	24	24.9	7.57	2.1e-13	12	12	15.8	4.66	6e-09	15	15	19.9	7.46	3.3e-13	8	8	9.8	7.03	2.1e-12	16	18	20.7	7.5	2.8e-13	20	21	23.4	7.69	1.2e-13	20	21
[626]		WP_011087191.1	19	19	45.6	8.23	1.2e-14	14	15	32.3	8.02	3e-14	18	20	41.3	8.34	7.9e-15	13	15	35.5	8.26	1.1e-14	15	16	43.5	7.55	2.2e-13	16	18	37.3	7.77	8.8e-14	16	18	38.9	9.21	1.9e-16	17	20	41.3	8.88	7.8e-16	16	17	36	10.24	2.3e-18	17	17
[627]		WP_028171412.1	16	25	58.5	8.6	2.6e-15	15	19	46.9	7.61	1.7e-13	15	21	50.7	7.82	7.2e-14	18	23	61.8	7.37	4.9e-13	13	19	47.5	7.41	4.1e-13	20	25	54.3	7.62	1.7e-13	18	24	58.5	8.25	1.1e-14	16	22	60	7.78	8.5e-14	16	23	50.7	7.86	5.9e-14	19	26
[628]		WP_011086589.1	12	19	45.4	9	4.7e-16	13	23	42.6	9.58	3.8e-17	14	21	49.2	9.73	2e-17	12	19	35.5	10.95	1.2e-19	17	22	58.6	8.56	3e-15	14	22	40.7	9.09	3.2e-16	14	25	51.5	9.53	4.8e-17	14	25	46.1	9.59	3.8e-17	14	27	50.8	9.97	7.4e-18	15	21
[629]		WP_011089743.1	14	17	52.1	8.92	6.6e-16	16	21	47.6	7.96	3.9e-14	9	10	36.4	8.16	1.7e-14	15	17	53.1	6.81	5.2e-12	16	19	52.6	8.52	3.7e-15	19	24	61.8	8.68	1.8e-15	16	20	52.6	8.1	2.1e-14	21	24	61.5	8.37	6.9e-15	18	20	58.6	7.79	8e-14	18	23
[630]		WP_011086813.1	16	21	49.4	9.72	2.1e-17	9	12	27.5	9.1	3e-16	15	19	50.2	8.12	2e-14	10	13	39.4	8.15	1.8e-14	9	11	32.7	8.43	5.3e-15	12	15	42.2	7.84	6.5e-14	15	17	53	10.75	2.7e-19	13	18	43.8	8.31	8.9e-15	12	17	38.2	7.36	5e-13	8	10
[631]		WP_038966840.1	15	19	61.2	7.91	4.8e-14	10	12	35.5	7.07	1.7e-12	15	17	53.3	7.77	8.7e-14	15	16	46.3	8.14	1.8e-14	9	11	38.3	8.46	4.7e-15	17	22	57.5	9.22	1.8e-16	14	20	72.4	8.77	1.3e-15	12	16	46.7	7.51	2.6e-13	10	13	57.5	8.34	7.9e-15	9	12
[631-1]	7	WP_011089697.1	11	16	45.8	7.9	5e-14	8	10	35.2	7.07	1.7e-12	11	12	35.2	7.77	8.7e-14	10	11	35.2	7.64	1.5e-13	8	10	35.2	8.46	4.7e-15	13	18	47.2	9.22	1.8e-16	10	16	40.7	8.26	1.1e-14	12	16	56.9	7.51	2.6e-13	10	13	47.2	8.34	7.9e-15	9	11
[632]		WP_011083959.1	21	22	60	8.27	1e-14	17	19	43	7.56	2.2e-13	20	22	55.1	7.59	1.9e-13	16	17	44.4	7.76	9.3e-14	13	14	37.3	6.53	1.8e-11	19	21	55.6	7.09	1.6e-12	19	20	49	7.78	8.3e-14	21	23	58.9	7.81	7.4e-14	17	19	49.9	8.22	1.3e-14	16	16
[633]		WP_011088175.1	16	24	50.8	9.11	2.9e-16	16	21	49.5	8.32	8.6e-15	13	21	49.8	10.16	3.3e-18	18	23	61.8	8.09	2.2e-14	13	17	39.5	7.83	6.7e-14	18	26	56.1	8.7	1.7e-15	17	24	58	8.24	1.2e-14	17	24	56.4	10.96	1.1e-19	13	20	50.8	9.25	1.6e-16	12	16
[634]		WP_011083379.1	17	26	78.6	9.26	1.5e-16	13	17	54.8	8.04	2.8e-14	14	22	77.9	9.31	1.2e-16	12	17	70.7	7.53	2.5e-13	12	15	49	8.25	1.1e-14	16	21	75.5	8.96	5.6e-16	16	21	71.4	8.57	2.9e-15	12	16	52	9.2	2e-16	14	22	71.4	9.17	2.2e-16	10	15
[635]		WP_257784508.1	16	16	13.3	6.13	6.3e-11	23	24	21	7.03	2.1e-12	20	21	20	5.98	7.3e-11	21	21	19.4	7.43	3.8e-13	17	17	18.8	5.83	7.5e-11	18	19	18.6	8.37	6.9e-15	23	23	22.4	6.47	2.3e-11	20	20	19.2	7.39	4.5e-13	19	19	18.8	7.33	3.2e-13	15	15
[636]		WP_011085781.1	12	13	20.1	7.48	3e-13	18	20	25.5	8.33	7.9e-15	11	13	16.8	6.53	1.7e-11	17	20	26.9	6.72	7.6e-12	13	14	19.8	5.54	1.2e-09	17	18	24.4	8.45	4.9e-15	20	22	31.6	7.18	1.1e-12	19	22	25.8	9.27	1.4e-16	13	15	19.4	7.31	6.2e-13	18	19
[637]		WP_038968081.1	14	14	19.5	7.07	1.8e-12	12	12	17.8	6.91	3.5e-12	15	15	24.3	7.37	4.8e-13	13	14	22.5	5.55	1.1e-09	12	12	20.5	5.41	8.3e-10	14	14	25	7.72	1.1e-13	19	19	28	7.09	1.6e-12	18	18	26.1	6.59	1.4e-11	23	24	38	8.39	6.1e-15	15	15
[638]		WP_011084212.1	17	21	44.4	8.18	1.5e-14	15	17	39.6	7.41	4e-13	19	22	41.6	7.72	1.1e-13	14	15	39.6	7.41	4.1e-13	14	16	34.5	6.84	4.6e-12	19	23	51	7.01	2.3e-12	19	22	53.3	9.62	3.3e-17	20	22	55.6	8.27	1.1e-14	17	20	44.9	7.75	9.7e-14	16	18
[639]		WP_011085554.1	15	18	27.3	8.2	1.4e-14	15	18	25.1	9.33	1.1e-16	19	23	33.4	10.02	5.9e-18	19	23	32.9	8.12	2e-14	12	14	21.2	6.64	1.1e-11	15	17	26	6.81	5.3e-12	13	15	22.7	7.83	6.8e-14	14	16	24.4	7.13	1.3e-12	15	19	25.6	7.58	1.9e-13	16	19
[640]		WP_011083385.1	15	15	43.5	8.01	3.2e-14	16	16	39.2	7.96	4e-14	14	16	39.4	8.19	1.5e-14	15	17	41.2	6.74	7.2e-12	23	24	54.4	8.25	1.2e-14	19	22	50.1	7.95	4e-14	19	22	53.1	8.13	1.9e-14	18	21	48	8.39	6.4e-15	12	12	31.8	7.11	1.5e-12	15	17
[641]		WP_008542552.1	16	24	57.9	11.46	1.3e-20	12	16	45.9	9.96	7.7e-18	15	17	44.2	8.78	1.2e-15	13	14	43.8	9.65	2.9e-17	12	12	37.3	8.26	1.1e-14	17	20	54.5	10.48	8.6e-19	13	16	42.9	7.74	9.9e-14	9	10	24.5	8.48	4.3e-15	16	19	52.4	9.41	8.2e-17	15	16
[642]		WP_011085549.1	12	22	33.6	10.38	1.3e-18	12	20	41.4	10.74	2.8e-19	14	23	54.5	9.58	3.9e-17	9	16	41.4	9.14	2.5e-16	10	14	33.6	9.2	2e-16	10	17	33.6	8.6	2.6e-15	12	21	45.5	10.63	4.4e-19	12	20	53.3	10.13	3.7e-18	9	16	32	9.69	2.5e-17	10	17
[643]		WP_097531964.1	16	20	39.9	7.94	4.2e-14	17	20	42.6	7.92	4.7e-14	17	21	42.6	7.53	2.4e-13	18	22	43.1	7.65	1.5e-13	16	19	39.9	7.85	6.3e-14	19	22	44.9	8.18	1.6e-14	20	23	45.5	8.68	1.8e-15	17	19	40.2	8.05	2.7e-14	16	18	41.2	6.68	9.3e-12	16	19
[644]		WP_011088986.1	15	16	39.5	9.99	6.9e-18	12	14	39.5	9.97	7.4e-18	11	12	33.8	9.46	6.6e-17	11	12	24.5	8.85	8.8e-16	9	10	27.1	9.48	5.9e-17	11	11	31.5	8.93	6.2e-16	11	12	31.2	9.19	2.1e-16	16	18	38.9	10.1	4.3e-18	11	13	39.8	10.73	2.9e-19	13	15
[645]		WP_011083569.1	13	19	41.5	7.99	3.5e-14	16	21	36.3	10.22	2.6e-18	18	24	37.3	12.81	4.1e-23	19	23	45.7	9.59	3.7e-17	18	21	42.7	8.49	4.1e-15	19	23	39	9.45	6.8e-17	15	23	46.9	10.37	1.3e-18	13	17	33.3	8.62	2.3e-15	15	21	33.3	9.04	4e-16	17	23
[646]		WP_011088127.1	14	17	39.2	9.88	1.1e-17	9	11	27	7.6	1.8e-13	14	19	42.1	8.75	1.4e-15	11	12	34.1	9.66	2.7e-17	7	8	23.7	8.89	7.5e-16	15	18	57	11.46	1.3e-20	13	18	34.1	8.67	1.9e-15	12	15	39.2	9.07	3.4e-16	13	17	38.9	9.23	1.7e-16	11	15
[647]		WP_011089861.1	13	13	19.1	9.24	1.7e-16	13	14	19.8	10.64	4.3e-19	14	15	19.4	10.73	2.9e-19	17	17	19.1	9.35	1e-16	17	17	25.4	7.68	1.3e-13	19	21	26.7	9.04	3.9e-16	15	17	19.8	10.28	2e-18	15	17	20.9	10.23	2.4e-18	13	15	21.1	10.2	2.8e-18	15	17
[648]		WP_011090704.1	17	31	53.6	7.95	4e-14	15	31	39.5	7.65	1.4e-13	17	34	50.4	8.26	1.1e-14	17	26	47.8	7.83	6.9e-14	19	31	47.8	7.76	9.2e-14	18	29	47.8	7.86	6.1e-14	16	29	47.8	8.49	4.2e-15	16	32	47.8	8.26	1.1e-14	15	28	39.5	7.8	7.7e-14	15	28
[649]		WP_038965780.1	17	21	33.5	8.77	1.3e-15	15	17	30.9	7.85	6.3e-14	18	23	34.3	8.97	5.4e-16	17	20	31.8	9.18	2.2e-16	11	12	23.7	8.23	1.3e-14	14	16	29.2	8.33	8e-15	17	21	29	8.88	7.9e-16	17	20	33.5	8.96	5.4e-16	17	20	32.4	9.32	1.2e-16	16	18
[650]		WP_011087633.1	18	28	59.5	9.69	2.5e-17	15	21	59.5	7.49	2.9e-13	16	23	54.7	7.35	5.2e-13	17	30	59.5	7.46	3.2e-13	16	22	48.6	7.95	4.1e-14	17	26	59.5	10.42	1.1e-18	14	23	59.1	8.72	1.5e-15	16	25	59.5	7.34	5.5e-13	15	25	59.5	7.42	3.8e-13	16	24
[650-1]	9	WP_011087631.1	11	12	34.1	7.88	5.5e-14	6	9	19.9	7.49	2.9e-13	10	12	31.3	7.35	5.2e-13	10	14	36.6	7.12	1.4e-12	8	9	18.3	6.84	4.6e-12	7	9	22.8	6.99	2.5e-12	8	9	30.9	8.72	1.5e-15	7	8	29.7	7.3	6.4e-13	11	13	41.1	7.42	3.8e-13	9	11
[650-2]	2	WP_026312601.1	1	1	3.6	1.55	1.3e-05	2	2	9.3	0.07	0.00025	1	1	3.6	-0.1	0.0033	1	1	3.6	1.84	2e-06	1	1	2.8	-0.31	0.00071	2	2	7.7	2.3	1.8e-07	1	1	3.6	2.04	5.1e-06	1	1	3.6	1.38	2.3e-05	2	2	9.3	2.09	3e-07	1	1
[651]		WP_011087495.1	15	15	37.1	6.91	3.5e-12	13	14	32.4	6.55	1.6e-11	17	19	39.4	7.81	7.4e-14	13	13	33.1	6.75	6.7e-12	11	11	30.5	7.4	4.3e-13	19	20	47.8	7.43	3.7e-13	16	19	37.9	9.28	1.4e-16	17	20	45.7	9.29	1.4e-16	21	23	56	9.99	6.9e-18	12	13
[652]		WP_011088522.1	15	17	34.2	9.57	4e-17	16	18	30.5	10.22	2.5e-18	17	22	36.7	8.91	6.8e-16	16	17	33.8	9.45	6.9e-17	10	10	23.6	6.84	2e-12	11	11	27.3	9.55	4.4e-17	13	13	29.6	9.47	6.3e-17	12	12	27.3	9.73	2.1e-17	11	11	30.3	8.92	6.5e-16	13	13
[653]		WP_011088169.1	15	25	50.3	11.53	9.5e-21	14	21	48	12.2	5.5e-22	14	20	47.1	9.98	7.1e-18	10	15	38.9	8.65	2.1e-15	13	17	42.4	9.26	1.5e-16	17	24	50	12.26	4.4e-22	12	18	43.6	11.06	7.2e-20	16	22	57	10.29	1.9e-18	12	17	43.6	9.71	2.2e-17	11	19
[654]		WP_011090839.1	16	22	46.8	9.69	2.5e-17	12	14	40.5	9.5	5.5e-17	15	20	48.6	9.8	1.6e-17	12	17	45.8	8.76	1.3e-15	12	12	34.9	7.01	2.2e-12	15	20	53.9	9.49	5.8e-17	14	19	38.4	8.94	6e-16	14	16	37	8.71	1.6e-15	15	20	46.5	9.66	2.7e-17	12	18
[655]		WP_011088270.1	13	18	69.9	7.06	1.8e-12	12	17	72.1	8.29	9.5e-15	12	18	70.3	10.2	2.8e-18	12	15	66.4	9.44	7.2e-17	10	11	59.4	6.82	5.2e-12	15	18	72.5	9.35	1e-16	15	20	76.4	6.82	5.1e-12	13	19	72.5	8.36	7.2e-15	13	17	63.3	8.52	3.6e-15	13	17
[656]		WP_011082957.1	18	23	52	10.32	1.7e-18	17	19	49.3	9.63	3.1e-17	19	23	51.7	8.89	7.3e-16	15	18	44.9	7.14	1.3e-12	16	17	54.4	9.14	2.5e-16	16	18	50.1	7.67	1.4e-13	16	20	55.7	9.9	9.9e-18	16	17	50.9	8.84	9.1e-16	13	16	44.3	10.17	3.2e-18	18	23
[657]		WP_011083260.1	20	28	58.4	7.17	1.1e-12	17	20	49.3	7.82	7e-14	17	22	46.1	8.1	2.1e-14	14	16	45.8	7.5	2.7e-13	17	20	47.7	7.55	2.3e-13	17	21	56.8	7.24	8.6e-13	17	22	49.6	7.71	1.1e-13	19	24	54.2	7.01	2.2e-12	16	22	57.4	8.47	4.5e-15	22	25
[658]		WP_011086779.1	17	24	61.8	12.33	3.1e-22	9	12	46.4	10.26	2.2e-18	13	18	57.7	12.03	1.1e-21	7	9	29.5	6.55	1.2e-11	6	7	31.4	3.97	1.1e-08	12	17	48.6	8.79	1.1e-15	13	18	51.4	12.96	2.1e-23	11	14	42.3	10.97	1e-19	11	18	60	11.3	2.5e-20	11	17
[659]		WP_011086741.1	14	19	47.1	8.96	5.4e-16	13	19	48.7	8.23	1.2e-14	17	25	48.5	8.03	2.8e-14	15	19	49.6	9.31	1.2e-16	13	18	47.1	8	3.2e-14	15	23	51.3	7.89	5.3e-14	15	20	51.5	8.83	9.6e-16	15	20	52.9	9.3	1.3e-16	13	19	48.7	7.54	2.4e-13	11	18
[660]		WP_011087445.1	16	29	75.9	10.06	5.2e-18	14	21	73.3	8.81	1e-15	16	22	81	8.26	1.1e-14	13	18	68.2	7.46	3.3e-13	16	23	81.5	8.49	4.1e-15	16	25	76.9	8.13	1.9e-14	18	29	82.1	9.07	3.5e-16	16	26	74.4	8.57	2.9e-15	14	24	70.8	8.99	4.9e-16	13	21
[661]		WP_011083292.1	19	20	26.6	6.47	6.4e-12	20	22	26.3	8.99	4.7e-16	18	19	27.3	6.72	7.9e-12	19	21	23.8	6.91	3.5e-12	17	18	24.3	6.34	4e-11	27	28	30.8	8.14	7.7e-15	20	22	23.6	8.19	1.4e-14	27	29	31.2	5.35	4.6e-10	19	22	25.5	5.26	7.5e-10	20	21
[662]		WP_011083326.1	12	17	66.2	13.24	6.5e-24	11	14	50.7	11.87	2.2e-21	12	16	65.7	12.15	6.8e-22	10	11	55.2	9.96	7.8e-18	7	7	48.8	10.96	1.1e-19	11	11	60.7	9.83	1.4e-17	16	20	66.2	11.29	2.7e-20	14	17	66.2	11.16	4.7e-20	14	18	66.7	11.73	4.2e-21	18	22
[663]		WP_011090542.1	18	29	34.6	8.63	2.3e-15	19	30	40.2	9.19	2.1e-16	18	30	33.8	9.48	6.1e-17	16	27	29	7.04	2e-12	19	25	31.1	8.05	2.6e-14	14	24	27.3	7.77	9e-14	17	28	27.5	6.45	2.5e-11	15	27	27.5	7.12	1.4e-12	19	29	40.2	7.82	7.1e-14	18	26
[664]		WP_011090179.1	18	19	55.3	9.5	5.6e-17	16	17	52.6	7.63	1.6e-13	16	17	60.4	8.56	3.1e-15	16	16	46.1	9.04	4e-16	17	18	53.4	7.95	3.8e-14	17	18	58.8	7.97	3.7e-14	17	17	54.2	7.31	6.3e-13	16	16	55.3	8.91	6.7e-16	19	20	63.6	9.07	3.4e-16	19	20
[665]		WP_011086957.1	14	17	34.6	10.96	1.1e-19	11	14	31.5	10.19	2.9e-18	11	12	29.4	8.6	2.5e-15	11	12	28.5	10.61	4.9e-19	8	9	20.7	7.24	8.6e-13	12	14	30.9	9.96	7.8e-18	15	17	39.3	11.81	2.9e-21	11	14	29.1	9.79	1.6e-17	14	17	38.7	10.46	9e-19	13	15
[666]		WP_011083509.1	14	18	87.8	9.93	8.7e-18	13	14	71.3	8.4	5.9e-15	15	15	80.2	7.7	1.2e-13	14	15	67.5	8.44	5.1e-15	13	13	56.1	8.08	2.3e-14	16	19	73.4	9.75	1.9e-17	15	16	88.2	9.67	2.7e-17	15	15	70	8.48	4.3e-15	17	20	87.3	12.04	1.1e-21	13	14
[667]		WP_011090072.1	14	16	52.2	7.89	5.4e-14	13	13	42.8	6.15	8.9e-11	12	13	31.1	8.9	7.2e-16	14	15	38.5	5.8	3.8e-10	10	11	27.8	6.09	7.3e-11	20	22	62.2	7.56	2.1e-13	22	28	57.9	7.51	2.7e-13	20	25	52.2	6.61	1.3e-11	14	16	40.8	7.92	4.7e-14	12	12
[667-1]	2	WP_011087987.1	1	1	2.9	4.02	4.1e-07	2	2	4.9	3.8	3.3e-07	2	2	7.5	3.98	6.7e-08	2	3	4.9	3.6	5.2e-07	1	1	2.9	2.75	1.5e-06	1	1	2.9	2.98	1.1e-06	1	1	2.9	3.98	3e-07	1	1	2.9	3.63	2.5e-07	2	2	4.9	3.96	3.3e-07	1	1
[668]		WP_011088551.1	14	21	58	11.11	5.7e-20	8	10	32.4	10.29	1.9e-18	11	15	48	9.98	7.1e-18	8	10	29.1	9.06	3.5e-16	10	10	39.9	6.86	4.3e-12	11	15	42.9	9.85	1.2e-17	8	12	40.8	9.21	1.9e-16	10	15	45.9	11.65	5.7e-21	11	17	44.1	10.68	3.6e-19	10	14
[669]		WP_011088745.1	15	18	51.9	8.51	3.7e-15	12	14	35.9	8.27	1e-14	15	19	50	11.2	3.8e-20	18	20	55.3	9.85	1.3e-17	13	15	38.4	7.84	6.4e-14	18	22	46.6	11.01	9e-20	12	16	39.7	7.04	2e-12	13	17	32.8	8.34	7.8e-15	12	15	43.4	9.05	3.8e-16	10	13
[670]		WP_011086859.1	14	20	49.4	11.31	2.5e-20	14	18	48.7	9.06	3.6e-16	16	18	50.6	9.6	3.6e-17	17	22	59.6	9.38	9.1e-17	12	15	38	6.76	6.6e-12	15	21	52	10.45	9.7e-19	18	24	56.1	9.82	1.4e-17	16	19	49.2	11.83	2.7e-21	15	22	54.4	9.68	2.5e-17	13	18
[671]		WP_011085714.1	15	17	49.5	9.26	1.5e-16	12	14	35.6	7.11	1.5e-12	16	18	54.2	8.98	5e-16	10	14	42.9	10.08	4.7e-18	14	16	46.5	9.3	1.3e-16	13	17	51.9	8.66	2e-15	14	17	54.7	9.8	1.6e-17	18	24	65.3	9.99	6.8e-18	13	16	42.7	9.19	2.1e-16	13	17
[672]		WP_011083418.1	16	20	50.5	10.38	1.3e-18	14	16	41.7	8.66	2e-15	12	14	35.5	9.17	2.3e-16	15	16	45	8.63	2.3e-15	11	11	37.8	6.43	2.7e-11	16	16	45.3	8.96	5.5e-16	13	14	47.9	7.91	4.8e-14	16	19	45	8.47	4.4e-15	12	15	42.3	7.44	3.5e-13	13	15
[673]		WP_011089061.1	17	21	49	11.08	6.4e-20	18	22	49	11.05	7.4e-20	17	21	60.7	9.86	1.2e-17	17	21	53.8	8.7	1.7e-15	16	19	48.7	7.28	7.1e-13	15	20	53.8	8.91	6.9e-16	15	20	43.2	7.55	2.3e-13	17	21	49	8.14	1.8e-14	19	23	62.7	9.97	7.5e-18	15	19
[674]		WP_028171719.1	16	18	45.7	8.95	5.8e-16	16	21	37.8	8.78	1.2e-15	17	22	42.3	8.83	9.5e-16	15	18	41.9	8.62	2.4e-15	12	12	29.5	8.84	9.2e-16	20	24	44.6	8.71	1.6e-15	15	21	35.6	8.48	4.3e-15	16	20	35.4	9.2	2e-16	17	21	45.5	8.99	4.9e-16	11	13
[675]		WP_011083535.1	19	32	59.8	12.39	2.5e-22	14	17	52	8.47	4.5e-15	15	25	49.7	11.17	4.5e-20	14	16	44.1	8.3	9.3e-15	11	14	41.9	8.01	3e-14	15	22	48.6	9.77	1.7e-17	13	22	44.1	11.11	5.8e-20	16	25	54.2	11.5	1.1e-20	17	29	58.7	9.05	3.8e-16	17	25
[676]		WP_011090144.1	17	20	35.4	12.43	2e-22	15	18	38.4	12.85	3.5e-23	17	22	39.9	13.08	1.3e-23	14	20	35.2	12.6	1e-22	17	20	33.9	10.87	1.6e-19	18	23	38.9	8.35	7.6e-15	17	21	39.2	11.19	4.1e-20	18	21	39.2	11.7	4.6e-21	15	18	32.8	8.44	5e-15	13	16
[677]		WP_011089988.1	18	18	40.9	7.72	1.1e-13	20	26	44.8	7.31	6.2e-13	20	21	46	7.7	1.2e-13	21	23	49.5	7.1	1.5e-12	17	17	35	6.35	3.7e-11	21	23	44.4	7.51	2.6e-13	19	22	46.8	8.23	1.3e-14	18	21	40.3	8.03	2.9e-14	19	21	47.6	8.43	5.2e-15	18	18
[678]		WP_011084215.1	18	23	56	8.47	4.5e-15	14	20	44.7	8.16	1.7e-14	18	27	51.4	7.7	1.2e-13	17	21	46.5	7.42	4e-13	14	17	49.3	6.43	2.7e-11	15	20	44.7	7.8	7.9e-14	16	21	44.7	7.54	2.3e-13	18	24	40.8	7.85	6.3e-14	14	21	44.3	8.05	2.7e-14	15	21
[679]		WP_038965697.1	19	19	36.1	7.93	2e-14	22	23	36.4	8.31	7.1e-15	19	19	27.8	9.33	1.1e-16	18	20	28	8.53	3.5e-15	13	13	22.8	4.67	3.2e-10	20	20	33.3	8.4	6e-15	16	17	23.2	7.74	6.5e-14	18	18	31.6	7.78	1.6e-14	20	21	30.5	7.93	4.5e-14	19	19
[680]		WP_011084053.1	15	19	50.6	10.26	2.2e-18	15	19	43.2	8.77	1.2e-15	15	21	44.1	10.14	3.5e-18	16	22	48	8.22	1.3e-14	15	18	38.7	8.43	5.3e-15	16	21	42.2	7.99	3.4e-14	15	19	38.1	8.04	2.8e-14	16	21	45.2	9.14	2.6e-16	15	20	44.5	9.32	1.2e-16	16	20
[681]		WP_011084069.1	12	23	69.3	12.62	9.3e-23	10	17	64.2	11.28	2.8e-20	10	17	59.5	11.24	3.3e-20	6	7	42.3	9.28	1.4e-16	10	14	62.4	8.52	3.6e-15	11	21	69.3	12.46	1.8e-22	9	13	54	9.74	1.9e-17	12	18	52.6	10.13	3.8e-18	11	19	52.6	9.79	1.6e-17	13	19
[682]		WP_011083330.1	16	22	55.3	6.79	5.7e-12	17	20	52.2	8.4	6.1e-15	19	24	50.5	6.21	6.7e-11	19	22	54.6	7	2.3e-12	17	18	60.8	7	2.4e-12	22	25	69.6	8.28	9.8e-15	19	24	66.9	9.02	4.3e-16	19	23	58	5.73	5.2e-10	19	24	63.1	6.79	5.7e-12	17	19
[683]		WP_011089263.1	19	20	34.7	7.53	2.4e-13	18	19	29.4	8.09	2.3e-14	15	16	25.7	8.07	2.4e-14	21	24	33.4	8.23	1.2e-14	17	17	26.6	8.17	1.6e-14	21	23	34.5	7.24	8.4e-13	19	20	31	7.4	4.2e-13	21	22	30.8	7.44	3.6e-13	16	17	24.7	7.68	1.3e-13	19	21
[684]		WP_028172745.1	14	17	37.8	8.17	1.6e-14	14	19	34	9.91	9.6e-18	16	22	37.8	9.28	1.4e-16	11	14	32.1	9.31	1.2e-16	16	21	42.9	9.23	1.8e-16	14	17	38.3	9.33	1.1e-16	15	19	39.7	9.77	1.8e-17	15	21	33.7	9.73	2.1e-17	13	18	33.4	8.22	1.3e-14	14	19
[684-1]	1	decoy											1	1	16.6	-0.18	0.00054											1	1	4.5	0.14	0.0028	2	2	21	0.62	0.00071	2	2	21	1.28	0.00011						1	1
[685]		WP_011088515.1	12	12	14.3	6.54	1.7e-11	19	20	23.5	8.06	2.6e-14	17	19	20.6	8.23	1.2e-14	21	25	24.8	6.92	3.3e-12	12	12	14.2	6.29	4.8e-11	14	15	16.9	7.3	6.6e-13	20	21	24	7.96	3.9e-14	17	18	24	7.97	3.8e-14	16	20	20.6	7.16	1.2e-12	16	18
[686]		WP_011083544.1	17	20	68.1	10.27	2.1e-18	12	15	57.4	8.38	6.6e-15	13	16	43.6	8.67	1.9e-15	12	14	43.6	8.97	5.2e-16	11	13	47.5	10.04	5.6e-18	12	15	57.4	9.22	1.8e-16	13	16	57.4	9.46	6.4e-17	12	15	58.3	7.67	1.3e-13	12	16	58.3	9.05	3.8e-16	12	15
[687]		WP_011086651.1	16	21	42.3	7.83	6.7e-14	16	19	41.1	7.41	4.1e-13	17	22	42.5	7.09	1.6e-12	14	14	31.9	6.83	4.9e-12	17	20	38.9	7.29	6.9e-13	20	23	40.6	6.93	3.2e-12	18	22	41.1	7.98	3.6e-14	20	23	43.2	7.5	2.8e-13	19	23	42.8	7.69	1.2e-13	16	18
[688]		WP_011083473.1	20	23	39.2	7.17	1.1e-12	21	24	35.9	8.17	1.6e-14	20	23	38	7.87	5.8e-14	21	26	38.2	7.19	1e-12	18	22	31.1	6.25	5.8e-11	19	25	36.9	8.12	2e-14	18	22	36.2	7.24	8.6e-13	24	28	40.3	7.07	1.8e-12	21	26	38.9	7.17	1.1e-12	17	21
[689]		WP_028174657.1	17	22	58.1	10.32	1.7e-18	14	18	47.2	11.03	8.1e-20	17	20	64.4	9.21	1.9e-16	12	14	44.4	6.91	3.4e-12	10	11	45.4	9.38	9.1e-17	14	16	53.2	9.33	1.1e-16	15	20	50.4	11.05	7.3e-20	14	18	55.3	11.57	7.9e-21	12	19	41.2	10.34	1.5e-18	16	20
[690]		WP_011089633.1	16	17	38.5	7.79	8.1e-14	19	21	40.1	9	4.7e-16	15	17	34.5	7.68	1.3e-13	14	15	33.7	6.65	1e-11	18	20	44.4	9.23	1.7e-16	19	20	42.9	9.45	6.7e-17	18	20	39.5	7.68	1.3e-13	18	19	43.7	7.59	1.9e-13	17	17	36.5	9.53	4.9e-17	17	19
[691]		WP_063921599.1	16	25	48	8.83	9.6e-16	18	26	51.7	7.46	3.2e-13	18	28	55.4	9.04	4e-16	17	25	54.7	10.4	1.2e-18	17	22	58.9	9.61	3.5e-17	18	24	58.7	9.01	4.4e-16	15	22	48	7.27	7.5e-13	19	28	55.7	8.05	2.7e-14	19	28	61.1	9.75	1.9e-17	20	26
[692]		WP_011089972.1	13	14	42.6	7.42	4e-13	14	14	42.1	8.95	5.9e-16	15	15	47.8	8.78	1.2e-15	16	16	41.1	8.26	1.1e-14	13	13	31.1	6.56	1.5e-11	17	17	48.1	8.67	1.9e-15	15	17	40	8.13	1.9e-14	19	20	52.6	7.48	3e-13	15	16	48.8	8.75	1.4e-15	17	18
[693]		WP_028171844.1	19	23	54.5	8.55	3.2e-15	16	19	45.5	9.32	1.2e-16	14	18	48.2	8.26	1.1e-14	16	17	42.7	8.43	5.2e-15	15	18	42.7	7.6	6.6e-14	17	20	59.2	10.43	1e-18	14	18	43.9	7.87	5.9e-14	16	18	66.7	8.56	3.1e-15	16	21	58	8.97	5.2e-16	14	18
[694]		WP_011087329.1	17	18	61.7	12.15	6.9e-22	16	17	60.2	12.35	2.9e-22	18	19	61.7	11.14	5e-20	17	19	55.6	9.9	9.9e-18	14	14	53.5	6.59	1.4e-11	14	14	51.7	11.05	7.3e-20	16	17	58.7	10.92	1.3e-19	17	18	58.7	12.52	1.4e-22	16	18	52.3	10.88	1.5e-19	18	18
[695]		WP_011083663.1	16	16	25.7	8.51	3.8e-15	16	19	24.8	8.26	1.1e-14	22	24	33	7.76	9e-14	13	16	22	8.24	1.2e-14						1	1	1.4	0.07	0.00036	1	1	2	0.26	0.00013	2	2	4.3	0.5	5.9e-05	20	21	35.6	8.11	2e-14	15	17
[696]		WP_011088364.1	15	29	56.3	11.93	1.7e-21	10	16	43.3	8.25	1.1e-14	15	24	56	11.5	1.1e-20	11	18	53.6	10.82	2e-19	11	15	36.9	8.14	1.8e-14	13	20	54	11.5	1.1e-20	11	17	43.3	9.36	1e-16	12	20	43.3	9.92	9.1e-18	13	23	54	8.63	2.2e-15	14	23
[697]		WP_011089205.1	16	17	22.8	8.04	2.8e-14	18	20	26.3	8.28	1e-14	19	22	31	8.93	6.4e-16	16	16	22.4	8.14	1.8e-14						5	5	8	4.78	3.4e-10	4	4	7.1	2.8	2.5e-07	6	6	10	5.44	2.2e-11	19	21	30.2	8.01	3.2e-14	13	14
[698]		WP_038966067.1	17	18	59	8.83	9.7e-16	8	8	28	6.48	2.2e-11	11	11	37.6	7.57	2.1e-13	11	12	36.6	7.03	2.1e-12	10	12	37.6	7.16	1.2e-12	13	13	45	8.01	3.1e-14	12	13	45	6.18	7.7e-11	14	17	50.3	7.88	5.6e-14	14	14	46.6	5.88	2.8e-10	11	11
[699]		WP_011088586.1	9	13	16.6	10.77	2.5e-19	8	10	16.4	9.15	2.4e-16	13	16	26.8	9.81	1.5e-17	12	16	26.8	11.67	5.3e-21	7	8	11.8	7.19	1.1e-12	10	14	22.7	9.66	2.7e-17	7	10	14.3	9.69	2.5e-17	7	10	12.8	10.53	6.8e-19	10	14	21.4	10.59	5.2e-19	9	12
[699-1]	7	WP_011088587.1	10	14	19.2	10.77	2.5e-19	7	10	14.3	9.15	2.4e-16	12	16	22.6	9.81	1.5e-17	10	15	21.9	11.67	5.3e-21	8	11	14.5	8.23	1.3e-14	9	12	21	9.66	2.7e-17	7	11	14.7	9.69	2.5e-17	9	13	17.4	10.53	6.8e-19	9	13	18.9	10.59	5.2e-19	7	11
[699-2]	9	WP_011088585.1	8	10	14.9	10.77	2.5e-19	5	7	10	9.15	2.4e-16	11	14	23	9.81	1.5e-17	10	15	22.2	11.67	5.3e-21	5	6	9.6	7.16	1.2e-12	9	12	19.9	9.66	2.7e-17	7	10	14.3	9.69	2.5e-17	9	12	17.4	10.53	6.8e-19	10	13	21	10.59	5.2e-19	8	10
[699-3]	10	WP_011088584.1	9	10	16.9	8.69	1.7e-15	7	8	13.2	9.15	2.5e-16	8	10	16.9	8.97	5.3e-16	10	12	22.8	8.93	6.2e-16	8	8	14.8	8.53	3.4e-15	10	11	19.1	8.16	1.6e-14	7	8	13.4	7.77	8.7e-14	8	9	14.7	8.5	3.8e-15	10	13	17	8.99	4.9e-16	7	8
[700]		WP_038966039.1	12	12	43.1	5.94	2.2e-10	13	14	43.3	11.79	3.2e-21	14	17	49.4	7.55	2.3e-13	15	15	60.8	11.39	1.7e-20	13	13	43.3	4.88	7.6e-10	9	9	38.1	6.1	1.1e-10	17	17	63.3	11.29	2.6e-20	12	14	47.8	10.66	3.9e-19	13	16	52.8	7.86	6.1e-14	13	16
[701]		WP_011085599.1	16	18	26.4	7.12	1.4e-12	15	18	21.5	7.84	6.6e-14	15	16	24.7	8.42	5.5e-15	15	17	22.4	8	3.3e-14	11	11	14.5	5.18	1.2e-09	10	11	15.9	8.32	8.4e-15	8	8	13.2	6.54	1.6e-11	11	12	18.9	6.5	2e-11	20	23	35.3	7.22	9.3e-13	17	17
[702]		WP_011088098.1	16	20	62.1	9.97	7.5e-18	15	17	53.5	10.46	9.3e-19	14	16	51.7	9.49	5.8e-17	12	12	45.4	10.07	4.9e-18	12	13	51.3	6.7	8.5e-12	15	17	61.7	6.88	3.9e-12	11	14	56.5	6.54	1.7e-11	13	14	53.5	7.94	4.2e-14	12	18	53.5	6.8	5.4e-12	12	13
[703]		WP_011087158.1	11	32	54.3	12.31	3.5e-22	11	33	59.6	11.06	7.1e-20	12	37	59.6	11.23	3.4e-20	9	26	54.3	10.06	5.1e-18	8	21	54.3	11.12	5.4e-20	11	31	54.3	11.21	3.7e-20	12	34	59.6	10.47	8.7e-19	12	32	64.4	10.67	3.7e-19	12	36	59.6	11.91	1.9e-21	11	28
[704]		WP_011085277.1	15	24	83.8	15.08	2.6e-27	9	12	46.9	8.56	3.1e-15	13	17	67.6	13.81	5.8e-25	9	10	51.4	7.28	7.2e-13	9	11	53.6	7.04	2e-12	11	14	65.9	8.7	1.7e-15	10	12	52.5	8.18	1.5e-14	12	16	52.5	9.47	6.2e-17	10	15	52.5	8.31	8.9e-15	10	13
[705]		WP_011086046.1	15	22	53	8.13	1.9e-14	14	19	43.3	7.21	9.5e-13	15	20	47	7.79	8.1e-14	13	17	42.1	8.03	2.9e-14	14	18	47.3	8.12	2e-14	16	21	49.9	8.01	3.2e-14	16	20	50.4	8.12	2e-14	14	20	47.3	8.06	2.6e-14	15	24	42.1	8.44	5.2e-15	12	16
[706]		WP_011090203.1	14	15	24.8	7.55	2.3e-13	13	15	22.2	7.99	3.4e-14	14	17	24.9	7.93	4.4e-14	15	16	23.5	7.06	1.8e-12	14	15	21.7	7.44	3.6e-13	17	19	29	8.18	1.5e-14	18	19	26.1	8.22	1.3e-14	15	17	24.9	7.66	1.4e-13	19	21	29.9	8.05	2.7e-14	18	19
[707]		WP_011085786.1	17	20	55.9	8.09	2.2e-14	14	17	52.7	8.5	3.9e-15	16	17	54.5	7.76	9.2e-14	16	17	59.5	7.57	2.1e-13	10	12	38	5.74	2.4e-10	15	16	55.9	9.92	9.1e-18	17	20	64.9	8.76	1.3e-15	17	18	65.6	8.04	2.7e-14	15	16	62.7	7.89	5.2e-14	12	13
[708]		WP_171463833.1	17	18	51.6	10.83	1.9e-19	12	13	46.4	10.09	4.4e-18	15	16	50.4	10.84	1.8e-19	15	16	42	9.4	8.6e-17	13	14	37.3	5.52	2.1e-11	17	18	51.3	8.63	2.2e-15	14	16	44.3	9.65	2.9e-17	13	15	47.5	9.37	9.6e-17	15	15	55.1	8.83	9.5e-16	17	17
[709]		WP_011090307.1	15	18	50.9	10.11	4.2e-18	11	14	45.5	9.15	2.4e-16	15	18	46.1	11.28	2.7e-20	15	18	53	10.07	4.8e-18	13	14	49.1	10.27	2.1e-18	17	21	67.6	10.64	4.2e-19	14	16	54.8	10.05	5.4e-18	15	17	62.7	8.55	3.1e-15	13	15	51.2	8.5	3.9e-15	16	19
[710]		WP_011087663.1	9	13	20.8	8.25	1.1e-14	15	18	31.8	7.76	9.3e-14	18	21	42.5	10.22	2.6e-18	18	22	41.8	10.76	2.5e-19	9	9	21.7	5.12	5.9e-10	12	13	25.7	8.7	1.7e-15	13	14	31.4	8.03	2.9e-14	13	14	33.5	7.08	1.6e-12	14	16	32.1	7.28	7.1e-13	17	21
[711]		WP_011090830.1	14	15	45.7	9.04	4e-16	14	15	43.4	7.77	8.8e-14	10	10	33.1	8.04	2.8e-14	18	18	53.4	9.84	1.3e-17	16	16	41.2	7.06	1.8e-12	16	17	53.1	10.06	5.1e-18	14	14	42.4	7.95	4.2e-14	11	12	40.2	8.34	7.9e-15	10	12	30.9	9.43	7.4e-17	15	18
[712]		WP_011085703.1	17	21	46.6	9.19	2e-16	16	21	49.8	8.77	1.2e-15	18	23	43.3	8.19	1.5e-14	17	21	51	8.33	8.1e-15	18	20	51.7	9.49	5.6e-17	17	21	51.9	7.8	7.7e-14	16	21	55.8	9.57	4.2e-17	17	21	49	8.35	7.3e-15	17	22	42.8	8.61	2.5e-15	16	19
[713]		WP_038966252.1	15	20	81.6	12.86	3.4e-23	11	13	57.3	8.02	3e-14	12	16	55.6	11.99	1.3e-21	11	15	57.7	8.45	4.8e-15	13	15	60.7	8.64	2.2e-15	11	15	51.9	8.94	5.9e-16	10	11	36.8	8.89	7.5e-16	10	13	42.3	10.13	3.7e-18	12	15	59	9.53	4.8e-17	13	16
[714]		WP_011083304.1	18	22	59	7.88	5.5e-14	17	21	63.5	8.38	6.6e-15	17	21	57.1	7.96	3.8e-14	12	15	51.4	10.58	5.6e-19	15	16	55.2	7.78	8.3e-14	16	20	62.5	8.93	6.2e-16	16	20	55.2	8.43	5.4e-15	14	16	60.6	8.13	1.9e-14	18	24	55.6	8.11	2e-14	15	17
[715]		WP_011087385.1	16	17	21.9	8.15	1.8e-14	16	17	22.8	5.96	2e-10	17	19	22.8	7.81	7.3e-14	15	16	19.3	5.76	4.6e-10	14	15	18.8	7.79	8.2e-14	19	21	25	7.72	1.1e-13	16	17	18.6	6.03	1.5e-10	16	19	21.6	8.32	8.4e-15	16	17	20.4	8.61	2.5e-15	15	18
[716]		WP_011086230.1	17	18	30	7.67	1.4e-13	17	17	30.1	8	3.4e-14	15	15	30	7.84	6.5e-14	13	13	22.2	6.92	3.3e-12	12	12	19.7	5.73	8.4e-11	14	14	26.4	7.96	3.9e-14	13	13	24.3	7.61	1.7e-13	15	15	24.5	6.88	4e-12	20	20	40.2	7.82	7.1e-14	13	13
[717]		WP_038966893.1	16	28	42.9	10.16	3.3e-18	15	23	42.9	9.42	7.6e-17	16	22	42.9	8.03	3e-14	18	24	44.7	8.87	8.2e-16	14	18	40	6.8	5.6e-12	14	20	35	8.79	1.1e-15	13	22	40	7.43	3.8e-13	13	20	45.6	8.55	3.1e-15	15	21	54.7	9.89	1e-17	13	17
[718]		WP_011084196.1	14	45	50.3	9.13	2.7e-16	10	25	44.6	8.82	9.9e-16	11	28	44.6	9.15	2.4e-16	9	15	50	9.18	2.2e-16	7	11	38.5	7.81	7.4e-14	11	21	44.6	9.26	1.5e-16	11	37	38.5	9.64	3e-17	10	30	38.5	9.17	2.3e-16	11	32	44.6	9.64	3e-17	11	18
[719]		WP_008136332.1	12	79	47.7	11.4	1.6e-20	13	45	47.7	11.21	3.8e-20	12	62	47.7	10.56	5.9e-19	13	43	52.8	11.66	5.6e-21	10	17	42.1	10.16	3.3e-18	13	35	52.8	11.24	3.3e-20	13	57	47.7	10.85	1.8e-19	14	50	52.8	11.92	1.8e-21	14	63	52.8	11.54	9.2e-21	12	36
[720]		WP_011086836.1	16	21	31.4	8.29	9.6e-15	17	20	37.9	9.16	2.4e-16	15	19	35.5	9.29	1.3e-16	15	17	28.4	8.65	2.1e-15	16	19	28.4	7.78	8.4e-14	16	19	32.1	7.68	1.3e-13	18	21	31.6	10.17	3.2e-18	16	21	32.3	8.67	1.9e-15	15	19	28.6	7.34	5.5e-13	13	16
[721]		WP_028172437.1	20	24	59.3	8.3	9.2e-15	9	13	33.6	8.21	1.3e-14	18	19	59.3	12.95	2.2e-23	15	17	37.6	7.19	1e-12	14	15	37.6	8.02	3e-14	17	19	53	7.16	1.2e-12	18	19	53	7.06	1.8e-12	16	18	41.7	7.35	5.2e-13	12	15	34.8	8.18	1.5e-14	16	18
[722]		WP_038965742.1	19	21	47.1	8.6	2.5e-15	12	13	26.5	7.6	1.9e-13	17	19	41.1	8.47	4.4e-15	13	14	22.6	8.08	2.3e-14	14	14	32.5	8.6	2.6e-15	14	16	28.8	7.88	5.5e-14	12	13	29	7.82	7.1e-14	16	17	35.1	7.63	1.6e-13	14	16	33.5	7.73	1e-13	15	16
[723]		WP_011090149.1	9	10	17.2	8.01	3.2e-14	16	16	25.8	6.15	3.2e-11	12	12	22.1	7.75	9.7e-14	12	12	23.5	8.7	1.7e-15	15	15	29.5	7.93	4.5e-14	20	20	33.9	9.17	2.2e-16	23	24	35.9	9.27	1.5e-16	19	20	27.3	7.37	4.9e-13	12	13	21.3	4.6	1.4e-08	14	14
[724]		WP_178372678.1	11	11	17.7	9.64	3e-17	9	9	12.5	6.19	7.1e-11	17	17	28	9.98	7.1e-18	18	19	30.2	9.05	3.7e-16	1	1	1.5	-0.06	0.00017	3	3	4.1	1.34	3.7e-06	3	3	5.3	7.4	1.5e-14	5	5	6.8	6.27	2.7e-13	16	16	27.8	10.29	1.9e-18	15	15
[725]		WP_038967299.1	17	21	28.8	6.8	5.5e-12	18	20	30.8	8.69	1.8e-15	14	18	22.5	8.97	5.2e-16	20	25	26	6.67	9.5e-12	12	12	20.4	5.46	1.6e-10	19	24	27.6	8.04	2.7e-14	18	29	27.5	9.09	3.1e-16	18	24	26	7.37	4.7e-13	18	25	27.3	7.73	1.1e-13	18	21
[726]		WP_011083187.1	15	17	47.6	6.82	5e-12	12	14	35.9	7.76	9.2e-14	15	18	46.3	9.54	4.7e-17	16	18	49.2	10.61	4.7e-19	14	14	49.8	7.34	5.6e-13	15	16	45.6	10.73	2.9e-19	17	18	55	7.5	2.8e-13	15	17	47.2	8.71	1.6e-15	17	20	48.5	7.61	1.8e-13	17	19
[727]		WP_038966342.1	13	16	26.6	9.14	2.5e-16	12	14	22.9	10.23	2.5e-18	15	18	33.1	9.23	1.7e-16	13	15	26.6	9.07	3.5e-16	9	11	22.7	9.43	7.3e-17	12	13	24.9	9.92	9.3e-18	15	20	35.4	9.17	2.3e-16	14	18	33.1	8.86	8.5e-16	12	14	29.2	9.64	3e-17	12	18
[728]		WP_011088732.1	16	16	48	8.14	1.8e-14	16	17	44.1	6.14	9.4e-11	18	19	64.3	7.8	7.9e-14	18	19	54.8	6.74	7e-12	15	15	47.7	6.8	5.6e-12	20	22	63.5	8.08	2.4e-14	17	17	60.5	7.88	5.5e-14	17	17	53.8	8.89	7.5e-16	17	17	48.7	7.87	5.8e-14	14	15
[729]		WP_038967063.1	15	18	37.4	10.64	4.2e-19	14	20	32.1	8.53	3.4e-15	17	22	41.9	11.82	2.8e-21	18	22	41	9.25	1.6e-16	15	15	37.2	8.14	1.8e-14	18	21	44.9	11.03	8.2e-20	16	20	35.7	12.76	5e-23	15	17	36.1	7.83	6.9e-14	19	24	44.7	9.83	1.3e-17	18	23
[730]		WP_011087568.1	15	15	68.1	7.66	1.4e-13	12	12	45.7	7.92	4.7e-14	11	11	40.1	7.83	6.7e-14	17	18	63.5	7.67	1.3e-13	13	14	45.7	6.62	1.2e-11	16	17	55	7.7	1.2e-13	17	18	56.7	7.75	9.6e-14	18	18	69.1	7.75	9.4e-14	15	16	55.7	8.15	1.7e-14	13	13
[731]		WP_011083818.1	12	13	37.5	7.91	4.9e-14	12	13	37.5	7.36	5.1e-13	13	17	42.3	10.08	4.6e-18	17	17	40.8	12.13	7.4e-22	9	9	33.2	7.23	8.8e-13	18	20	49.4	11.14	5.1e-20	16	19	49.9	10.99	9.6e-20	16	18	43.8	9.09	3.1e-16	13	15	36	10.68	3.6e-19	12	12
[731-1]	16	WP_011089388.1	7	8	27.8	8.3	9.3e-15	6	7	27.8	7.36	5.1e-13	11	13	42.9	8.54	3.4e-15	6	6	19.1	7.45	3.4e-13	6	6	23.8	5.71	3.4e-11	10	11	27.5	7.79	8e-14	9	11	33.3	7.78	8.5e-14	7	9	21.1	8.59	2.7e-15	12	13	41.2	8.01	3.2e-14	9	9
[732]		WP_011087847.1	16	17	33.9	9.88	1.1e-17	17	17	43.1	11.33	2.2e-20	16	17	33.7	11.01	8.7e-20	18	18	39	9.07	3.4e-16	14	14	38	7.96	3.9e-14	18	18	41.5	10.28	1.9e-18	18	19	36.4	7.18	1.1e-12	15	17	36.6	9.2	2e-16	15	16	38.6	9.07	3.4e-16	14	15
[733]		WP_011083902.1	15	18	47.7	11.37	1.9e-20	12	14	44	11.71	4.4e-21	14	18	47.7	7.34	5.5e-13	12	14	37.2	13.06	1.4e-23	9	11	23.7	8.23	1.3e-14	13	15	35	8.83	9.4e-16	12	15	35	6.91	3.5e-12	14	17	44	9.97	7.6e-18	13	16	44	11.97	1.5e-21	12	13
[733-1]	2	WP_038966801.1	1	1	3.6	3.17	2.2e-06	2	2	12.3	3.69	2.7e-07	1	1	3.6	0.06	0.001	1	1	3.6	4.02	7.9e-07	1	1	3.6	3.78	9.6e-07	1	1	3.6	3.57	2.9e-06	1	1	3.6	3.99	7e-07	1	1	3.6	3.57	4.2e-06	1	1	3.6	3.39	1.2e-05	1	1
[734]		WP_011083043.1	14	17	54.8	10.08	4.7e-18	10	11	31.2	9.04	4e-16	13	16	43.8	9.06	3.6e-16	11	13	34.6	9.33	1.1e-16	11	11	29.1	6.59	1.3e-11	15	19	47.9	10.33	1.6e-18	14	19	49.7	9.37	9.7e-17	15	17	48.6	9.76	1.8e-17	11	13	25	9.6	3.6e-17	11	14
[735]		WP_011090552.1	10	11	29.4	9.45	6.9e-17	13	13	41.7	9	4.7e-16	17	18	50.5	10.2	2.7e-18	13	14	36.3	10.44	1e-18	8	8	29.4	5.78	4.2e-10	10	10	34.3	6.99	8.5e-13	17	17	50.7	8.63	2.2e-15	12	13	37.7	7.68	7.2e-14	13	14	42.4	8.01	3.2e-14	10	10
[736]		WP_011083529.1	16	17	43.1	7.52	2.5e-13	12	14	29.9	6.82	5e-12	16	20	39.4	8.9	7e-16	16	18	31.8	9.27	1.5e-16	12	13	32	8.14	1.8e-14	16	17	40.3	7.18	1.1e-12	12	14	30.3	7.89	5.3e-14	18	19	48.5	7.15	1.2e-12	15	17	36.1	9.02	4.3e-16	14	15
[737]		WP_011087338.1	13	15	39.7	10.51	7.5e-19	15	16	53.6	9.51	5.2e-17	9	11	28.7	8.01	3.1e-14	13	14	39.1	9.69	2.5e-17	11	11	32.2	7.45	3.5e-13	16	18	45.2	8.47	4.4e-15	16	21	49.6	8.76	1.3e-15	14	14	46.4	10.45	9.6e-19	15	17	52.2	9.5	5.4e-17	15	19
[738]		WP_011083512.1	17	29	77.8	9.23	1.7e-16	12	17	67.1	7.62	1.7e-13	17	25	78.7	8.98	4.9e-16	16	22	74.4	7.64	1.5e-13	14	20	78.3	7.29	6.8e-13	16	28	72.5	7.33	5.7e-13	18	27	77.8	7.71	1.1e-13	15	24	74.4	7.74	1e-13	16	26	74.4	8.54	3.3e-15	16	23
[739]		WP_011089476.1	16	24	55.2	9.3	1.3e-16	13	16	35.5	9.41	8.2e-17	15	20	46.3	9.57	4.1e-17	15	18	42.5	9.93	8.9e-18	5	5	19.7	6.56	5.2e-12	9	11	37.1	7.47	3.2e-13	7	8	27	4.94	1.5e-08	9	11	34.4	8.09	2.2e-14	17	22	55.2	10	6.7e-18	12	14
[740]		WP_011088207.1	15	17	51.6	10.56	6e-19	12	14	37.7	8.22	1.3e-14	14	17	43.5	8.25	1.2e-14	13	17	44	7.98	3.6e-14	12	13	40.1	7.64	1.5e-13	13	14	50.6	7.87	5.8e-14	14	17	41.3	8.1	2.2e-14	14	17	50.6	7.84	6.5e-14	15	17	51.8	8.64	2.2e-15	12	14
[741]		WP_038966437.1	17	19	66.2	9.34	1.1e-16	12	13	49.4	6.26	5.4e-11	15	16	55.2	9.47	6.3e-17	14	16	50.6	8.72	1.5e-15	15	17	60.7	8.24	1.2e-14	15	17	57.6	9	4.6e-16	16	18	68.9	9.12	2.8e-16	16	17	62.8	9.38	9.4e-17	17	20	69.5	10.28	1.9e-18	16	19
[742]		WP_011084122.1	16	19	66	8.46	4.7e-15	14	16	55.6	7.59	1.9e-13	11	13	39.9	8.74	1.4e-15	13	14	42.9	8.81	1.1e-15	12	14	36.6	7.83	6.9e-14	18	22	55.6	8.03	2.9e-14	15	17	55.6	8.52	3.6e-15	13	15	46.6	8.31	8.7e-15	12	15	48.9	7.97	3.8e-14	14	18
[743]		WP_011090678.1	10	12	50	10.3	1.8e-18	12	12	54.3	10.73	3e-19	13	13	61.3	10.8	2.2e-19	14	14	48	8.94	5.9e-16	10	10	42.6	8.31	8.7e-15	13	13	44.9	8.71	1.6e-15	14	15	56.6	10.05	5.3e-18	11	11	55.5	8.16	1.7e-14	12	13	45.7	8.54	3.3e-15	15	15
[744]		WP_011090612.1	16	35	55	8.85	8.9e-16	9	11	41.5	8.94	6.1e-16	16	20	55	8.33	8.1e-15	11	11	46.9	6.49	2.1e-11	12	13	54.2	7.83	6.9e-14	15	20	57.3	9.58	3.9e-17	15	24	56.5	9.18	2.2e-16	14	18	55	8.87	8e-16	14	18	63.1	11.53	9.5e-21	11	15
[745]		WP_011088347.1	17	19	38.9	14.34	5.9e-26	16	19	29.3	10.12	4e-18	16	18	29.3	8.01	3.2e-14	11	11	25.7	7.54	2.4e-13	15	16	33.3	11.62	6.4e-21	18	21	40.9	8.46	4.6e-15	18	21	34.3	8.69	1.7e-15	19	23	43.9	10.25	2.3e-18	18	20	42.3	12.31	3.4e-22	15	15
[746]		WP_011083444.1	15	15	22.4	9.11	2.9e-16	15	15	17.3	11.01	8.7e-20	18	18	27.3	9.1	3.1e-16	12	12	16.8	8.49	1.9e-15	13	13	18.8	7.51	2.6e-13	14	14	21.5	9.79	1.6e-17	12	12	18.5	8.64	2.2e-15	18	18	25.7	7.4	4.2e-13	13	13	17.5	8.09	2.3e-14	15	15
[747]		WP_011085545.1	18	22	38.6	7.09	1.6e-12	15	19	29.3	7.85	6.3e-14	13	16	22.6	7.02	2.1e-12	13	16	28.7	6.45	2.5e-11	12	13	20.2	6.66	1e-11	15	18	30.1	7	2.4e-12	15	18	28.9	6.81	5.4e-12	16	19	34.1	6.65	1.1e-11	15	16	35.4	7.04	2e-12	13	15
[748]		WP_011087505.1	16	23	44.3	6.81	5.3e-12	19	23	49.7	7.9	5e-14	19	22	46.1	6.76	6.6e-12	18	19	46.7	9.17	2.3e-16	21	25	58.4	6.89	3.7e-12	19	21	47.9	7.76	9e-14	16	21	51.8	7.81	7.5e-14	17	21	49.7	6.84	4.6e-12	13	18	41.6	7.33	5.7e-13	15	19
[749]		WP_011083386.1	16	18	37.1	8.02	3e-14	20	21	45.1	8.25	1.1e-14	15	16	34.1	6.23	6.3e-11	12	13	30.1	5.43	9.2e-12	10	11	21.1	4.35	4.9e-09	18	19	35.6	6.26	1.7e-12	20	21	47.3	7.66	1.4e-13	19	21	45.5	7.74	9.8e-14	16	17	38	6.59	4.9e-12	16	17
[750]		WP_038967088.1	14	18	69.3	12.42	2.1e-22	12	13	65.6	7.83	6.7e-14	10	11	69.3	7.35	5.4e-13	7	9	51.5	10.79	2.2e-19	6	6	47.9	7.06	4.8e-13	11	11	63.8	10.52	7.2e-19	9	11	69.3	8.78	4.4e-16	8	9	57.1	6.53	1.8e-11	14	15	75.5	7.85	6.2e-14	11	12
[751]		WP_011084790.1	18	18	18	7.13	1.3e-12	17	19	15.3	7.26	7.9e-13	18	18	17.8	5.92	2.4e-10	12	12	10.1	6.51	1.9e-11	14	14	13.5	4.69	9.9e-09	14	14	13.4	6.42	2.7e-11	17	19	17.4	6.3	4.6e-11	19	20	16.9	7.12	1.4e-12	21	22	20.5	7.41	4.1e-13	12	13
[752]		WP_038967085.1	15	17	26.1	9.28	1.4e-16	15	17	30.1	9.12	2.7e-16	14	16	25.3	9.25	1.6e-16	15	16	30.1	5.95	2.1e-10	9	9	18	6.33	4.1e-11	12	12	22.5	6.74	7.2e-12	14	16	28.3	10.11	4.1e-18	14	16	23.7	10.16	3.4e-18	15	16	30.3	6.85	4.5e-12	17	18
[753]		WP_011083059.1	15	19	59.9	10.32	1.6e-18	7	8	51.8	6.83	1.3e-12	9	11	56.9	9.08	3.3e-16	6	7	39.1	8.68	1.8e-15	7	9	55.8	6.17	1.5e-11	10	10	66	8.77	1.2e-15	9	10	49.2	7.36	5e-13	9	10	51.8	7.1	1.5e-12	9	10	61.9	9.1	3e-16	9	10
[754]		WP_028174923.1	15	19	50	8.8	1.1e-15	16	20	50	8.35	7.3e-15	14	16	37	8.19	1.5e-14	15	19	50	9.2	2e-16	14	17	45.4	8.88	7.8e-16	14	19	45.4	8.3	9.2e-15	14	17	45.4	8.02	3e-14	14	17	37	7.25	8.1e-13	16	21	55.9	7.92	4.7e-14	15	18
[755]		WP_011086586.1	15	19	38.3	8.15	1.7e-14	14	17	38.8	9.72	2.2e-17	15	18	39.5	8.29	9.5e-15	15	18	39	9.11	3e-16	11	12	23	6.79	5.8e-12	17	19	42.6	9.29	1.4e-16	12	16	27.6	7.25	8.1e-13	14	19	35.5	8.93	6.3e-16	16	20	42.6	8.38	6.4e-15	10	12
[756]		WP_011086852.1	13	32	23.9	7.94	4.3e-14	11	25	36.3	9.18	2.1e-16	14	29	36.3	8.03	2.9e-14	13	21	23.9	8.07	2.4e-14	14	19	58.2	9.74	1.9e-17	15	27	36.3	9.71	2.3e-17	14	31	42.8	11.61	6.7e-21	11	23	23.9	7.64	1.5e-13	13	38	36.3	9.22	1.8e-16	12	27
[757]		WP_011085112.1	12	13	11.1	6.04	3.9e-12	10	11	11.6	7.42	3.8e-13	13	14	11.8	8.8	1.1e-15	16	21	15.4	8.99	4.8e-16	9	9	8.4	3.74	8.4e-08	12	13	11.8	5.21	3.1e-10	13	14	12.8	6.98	1.8e-12	12	13	10.4	7.09	1.6e-12	14	16	13.1	7.03	1.6e-12	14	15
[758]		WP_011089241.1	16	22	62.8	8.51	3.8e-15	13	13	62.8	9.59	3.7e-17	13	16	68.9	6.32	4.3e-11	9	11	55.6	8.12	2e-14	10	10	57.2	6.7	1.3e-12	13	14	62.8	8.9	7.2e-16	13	18	62.8	8.3	9.3e-15	14	16	62.8	7	2.3e-12	16	20	62.8	8.11	2e-14	12	13
[759]		WP_011083073.1	18	19	46.9	7.4	4.3e-13	19	20	48.4	6.47	2.2e-11	19	21	58.2	8.61	2.5e-15	13	15	42.4	7.72	1.1e-13	11	12	38.9	6.34	3.9e-11	15	18	45.1	7.59	1.9e-13	18	20	44.5	6.34	3.9e-11	18	19	47.5	7.05	1.9e-12	14	14	44.2	7.99	3.5e-14	20	23
[760]		WP_011085876.1	18	20	46.7	8.86	8.4e-16	19	21	53.1	9.07	3.4e-16	16	18	46.7	7.93	4.4e-14	16	17	38.2	8.41	5.9e-15	12	13	34	8.13	1.9e-14	15	16	39.3	7.4	4.2e-13	13	14	27.4	6.13	9.5e-11	16	17	44.5	7.79	8.2e-14	14	15	34.6	9.07	3.4e-16	15	16
[761]		WP_038966379.1	17	22	73.2	9.17	2.3e-16	10	11	41.4	8.87	7.9e-16	10	11	45	7.88	5.4e-14	11	11	53.6	9.16	2.3e-16	12	12	45.9	9.01	4.4e-16	15	18	52.7	8.21	1.4e-14	14	17	52.7	9.56	4.3e-17	12	15	64.5	8.01	3.1e-14	12	14	57.7	8.87	8.2e-16	11	12
[762]		WP_011088736.1	14	17	57.9	8.14	1.8e-14	12	15	52.3	10.2	2.7e-18	15	19	65.6	12.85	3.4e-23	14	17	56	8.21	1.4e-14	12	14	52	11.97	1.5e-21	9	15	38.1	6.94	3e-12	12	15	51.7	10.2	2.7e-18	13	14	54.3	9.36	1e-16	11	17	43.4	9.77	1.8e-17	11	16
[763]		WP_011090493.1	17	23	44	9.22	1.8e-16	17	22	47.4	9.01	4.4e-16	18	23	54.9	9.54	4.5e-17	17	19	52	8.27	1.1e-14	15	18	45.7	7.75	9.7e-14	18	21	57.8	9.18	2.1e-16	18	21	50.3	9.95	8.1e-18	18	20	46	9.83	1.3e-17	17	25	48	9.35	1.1e-16	14	16
[764]		WP_011083275.1	15	26	65.6	10.35	1.5e-18	9	10	43	6.63	1.2e-11	10	12	44.6	9.08	3.3e-16	11	13	46.8	9.73	2.1e-17	11	12	49.5	8.97	5.3e-16	12	16	49.5	8.16	1.7e-14	11	15	58.6	6.57	1.5e-11	11	15	48.4	8.26	1.1e-14	9	11	43	8.61	2.5e-15	10	10
[765]		WP_011086858.1	16	26	56.7	9.19	2.1e-16	14	20	56.7	10.04	5.6e-18	14	20	53.5	10.74	2.7e-19	15	18	56.7	9.51	5.3e-17	14	18	44.1	11.03	8.1e-20	18	23	56.7	8.44	5.1e-15	15	22	56.7	10.66	3.8e-19	17	19	65.3	7.57	2.1e-13	14	19	53.5	10.95	1.1e-19	16	20
[766]		WP_038965125.1	19	24	67.1	6.71	8.2e-12	17	19	51.9	5.78	4.3e-10	17	19	60.3	6.92	3.3e-12	16	17	56.3	7.57	2.1e-13	9	9	34.9	6.77	6.2e-12	13	15	44.7	7.98	3.5e-14	18	19	70.2	5.98	1.8e-10	17	22	58.3	6.01	1.6e-10	19	23	62.7	8.24	1.2e-14	20	24
[767]		WP_236842096.1	14	17	57.1	9.8	1.5e-17	12	16	50	8.84	9.3e-16	13	16	62.1	9.27	1.5e-16	11	14	56.4	10.48	8.4e-19	10	11	42.5	7.21	9.4e-13	10	13	46.1	9.99	6.9e-18	12	14	60.4	9.58	3.9e-17	12	14	50	9.57	4.1e-17	12	17	55	10.23	2.4e-18	11	14
[768]		WP_011089344.1	14	18	37.6	8.37	6.7e-15	14	17	37.6	8.15	1.7e-14	16	20	45.9	8.76	1.3e-15	16	20	43.3	8.62	2.3e-15	12	16	28.8	7.54	2.3e-13	16	20	44.8	8.42	5.6e-15	14	17	37.6	7.84	6.4e-14	13	17	35.8	9.79	1.6e-17	15	19	44.2	9.13	2.6e-16	14	19
[769]		WP_038966578.1	16	17	49.2	9.54	4.7e-17	10	10	34.7	8.86	8.4e-16	16	19	49.2	9.14	2.6e-16	11	12	43.8	9.01	4.5e-16	8	8	23.9	7.03	2e-12	14	15	49.5	9.19	2.1e-16	13	15	43.8	8.46	4.7e-15	12	13	38	8.16	1.7e-14	16	17	50.5	8.8	1.1e-15	13	14
[770]		WP_011085163.1	13	18	40	7.34	5.4e-13	15	20	41.7	7.39	4.4e-13	15	19	35	7.55	2.2e-13	13	17	38.7	7.82	7e-14	15	18	42.4	7.04	2e-12	16	21	40.7	7.86	6.1e-14	16	20	43.7	8.68	1.8e-15	17	21	46.2	7.19	1e-12	16	21	47.1	8.83	9.6e-16	16	20
[771]		WP_011085749.1	17	17	31.8	7.33	5.8e-13	20	20	37.2	7.81	7.4e-14	18	19	32.3	7.79	8.2e-14	16	16	28.3	9.62	3.3e-17	19	21	36.6	8.87	8.1e-16	15	16	30.1	7.01	2.2e-12	19	19	34.4	8.04	2.7e-14	14	14	30.1	10.58	5.4e-19	19	21	38.4	10.13	3.8e-18	16	16
[772]		WP_011083171.1	17	19	59.1	11.71	4.4e-21	10	11	28.2	7.03	2e-12	12	12	37.6	8.05	2.6e-14	13	13	36	10.15	3.4e-18	13	15	36.6	7.66	1.4e-13	16	17	44.9	9.68	2.6e-17	12	15	43	9.14	2.5e-16	14	16	47	8.57	2.9e-15	16	19	53.5	9.13	2.7e-16	13	14
[773]		WP_038966424.1	10	12	23.7	8.29	9.6e-15	13	14	23.7	7.32	6e-13	8	9	17.5	5.91	2.4e-10	7	10	19	8.67	1.9e-15	16	18	32.6	10.05	5.2e-18	9	10	19.4	9.37	9.7e-17	14	16	31.4	9.21	1.9e-16	13	14	29.4	8.56	3e-15	14	16	26.9	8.87	7.9e-16	11	12
[774]		WP_011090530.1	15	19	39.7	8.34	7.7e-15	15	16	38.2	6.69	8.8e-12	15	18	37.4	6.34	3.9e-11	17	18	41.3	6.73	7.5e-12	9	9	30.8	4.7	1.4e-09	12	14	39.5	6.35	3.7e-11	13	14	42.8	6.77	6.2e-12	14	15	39	8.39	6.2e-15	16	19	43.6	7.63	1.6e-13	14	15
[775]		WP_038965460.1	18	21	46.9	7.17	1.1e-12	14	16	32.4	7.11	1.5e-12	17	20	45.4	6.14	9.2e-11	19	20	42.6	7.09	1.6e-12	15	15	44.1	6.56	1.6e-11	17	18	38.2	8.43	5.4e-15	15	18	29.4	7.63	1.6e-13	16	18	39.9	6.1	1.1e-10	15	17	35.4	8.87	8e-16	16	19
[776]		WP_011086022.1	16	17	41.8	9.36	1e-16	12	14	36.8	9.58	3.9e-17	14	18	40.8	9.84	1.3e-17	13	16	38.3	8.76	1.3e-15	13	13	30.4	6.37	2.3e-11	16	17	42	9.28	1.4e-16	12	13	28.6	9.55	4.4e-17	13	15	36.6	9.18	2.2e-16	16	18	43.5	9.8	1.5e-17	14	15
[777]		WP_011089342.1	18	19	57.1	10.22	2.5e-18	11	11	32.5	6.22	6.4e-11	14	15	38.3	9.03	4.1e-16	12	12	48.6	9.06	3.6e-16	14	14	46.4	9.57	4e-17	16	16	55.2	8.48	4.3e-15	18	19	56.3	9.17	2.2e-16	15	16	52.5	8.99	4.7e-16	13	15	42.9	8.75	1.3e-15	13	13
[778]		WP_011085250.1	14	15	18.5	8.77	1.2e-15	13	14	13.2	7.6	1.8e-13	19	20	21.2	8.59	2.7e-15	15	16	17.7	6.42	7.4e-12	11	12	14.6	8.81	1.1e-15	17	18	20	7.53	2.4e-13	17	18	17.7	7.65	1.5e-13	18	19	23.4	8.15	1.8e-14	18	20	25.6	9.28	1.4e-16	13	14
[779]		WP_038966450.1	13	17	34.8	8.7	1.6e-15	12	15	45.9	9.06	3.6e-16	16	21	47.5	9.12	2.8e-16	12	14	41.2	8.27	1e-14	12	13	39.2	8.77	1.2e-15	12	15	37.1	7.89	5.3e-14	12	16	38.7	8.55	3.2e-15	13	15	42.2	9.08	3.3e-16	16	22	48.4	8.32	8.5e-15	14	17
[780]		WP_038966881.1	14	18	44.5	10.82	2e-19	14	18	41.8	9.93	8.9e-18	15	19	49.1	10.52	7.1e-19	14	16	45.2	9.67	2.7e-17	9	9	37.3	6.65	1.1e-11	14	17	40.6	9.97	7.4e-18	13	16	43.9	9.61	3.5e-17	12	14	44.5	9.39	8.7e-17	15	19	49.1	9.26	1.5e-16	14	18
[781]		WP_011085492.1	17	20	60	7.84	6.4e-14	11	13	50.5	6.97	2.7e-12	16	19	60.4	8.94	6e-16	13	15	47.4	7.98	3.5e-14	15	15	54	4.98	9.8e-10	16	18	50.5	7	2.3e-12	18	21	68.4	7.49	2.8e-13	17	18	64.2	6.46	2.4e-11	18	25	60.4	7.68	1.1e-13	15	20
[782]		WP_011087708.1	16	22	42.2	9.25	1.6e-16	13	14	33.6	8.84	9.2e-16	18	21	43.6	9.32	1.2e-16	14	18	35.5	9.46	6.6e-17	15	15	41.2	8.45	4.8e-15	12	14	36.5	10.63	4.5e-19	14	15	40.3	9.33	1.1e-16	16	20	42.2	10.13	3.8e-18	11	16	33.6	8.59	2.7e-15	13	14
[783]		WP_011088202.1	16	21	43.8	7.35	5.3e-13	11	15	28.8	7.09	1.6e-12	11	17	33.6	7.54	2.4e-13	13	14	42.1	7.78	8.6e-14	10	11	34.7	7.32	5.9e-13	18	19	45.8	7.05	1.9e-12	9	12	29.9	7.54	2.3e-13	13	16	32.5	7.48	3e-13	15	20	43.8	7.65	1.5e-13	17	19
[784]		WP_011088348.1	15	17	48.1	9.48	6e-17	8	10	22.5	9.12	2.8e-16	13	17	34.4	9.25	1.6e-16	6	7	17.1	8.21	1.3e-14	13	13	39.3	6.23	6.3e-11	16	19	48.1	9.5	5.6e-17	16	19	36.7	8.98	5.1e-16	17	19	45	10.37	1.3e-18	13	15	40.1	10.2	2.8e-18	9	10
[785]		WP_011085412.1	14	21	48.4	10.41	1.1e-18	11	14	36.2	8.68	1.8e-15	14	17	40.6	9.65	2.9e-17	11	13	30.9	9.47	6.2e-17	10	11	30.9	8.04	2.8e-14	13	15	38.4	8.89	7.4e-16	15	17	45.6	10.02	6e-18	12	15	38.4	9.47	6.3e-17	13	18	40	8.86	8.5e-16	12	13
[786]		WP_011082972.1	13	13	46.3	9.97	7.3e-18	11	13	46.3	9.32	1.2e-16	12	13	49.3	9.77	1.7e-17	9	11	38.5	8.96	5.5e-16	7	7	34.4	7.12	8.2e-14	13	16	46.3	8.64	2.2e-15	9	11	37.8	9.96	7.8e-18	12	14	55.6	9.44	7.2e-17	13	15	55.2	9.55	4.4e-17	14	16
[787]		WP_038965922.1	16	19	64.3	9.23	1.7e-16	9	10	36.7	5.93	2.2e-10	14	15	57.8	10.38	1.3e-18	13	14	58.5	9.95	8.1e-18	10	11	42.5	9.57	4e-17	13	16	63.3	10.06	5e-18	14	16	55.8	9.89	1e-17	15	16	58.8	10.49	8.2e-19	11	13	50	9.85	1.2e-17	12	13
[788]		WP_008138878.1	13	18	50.6	10.03	5.8e-18	11	14	48.1	9.29	1.4e-16	13	17	54.5	10.02	6e-18	12	13	51.9	8.69	1.7e-15	10	12	47.2	8.74	1.4e-15	12	14	47.2	9.97	7.3e-18	13	16	51.9	8.58	2.8e-15	12	18	50.6	8.64	2.1e-15	11	15	50.6	9.53	4.9e-17	13	18
[789]		WP_028172601.1	15	18	40	8.78	1.2e-15	11	12	32.1	7.18	4.7e-13	17	18	48.5	8.03	3e-14	13	14	35	7.55	4.1e-14	3	3	9.3	2.17	5e-07	5	5	13.2	5.35	5.4e-12	10	10	28.4	6.73	1.1e-12	8	9	21.6	5.73	1.7e-10	15	18	47.5	7.25	8.1e-13	12	13
[102-1, 789-1]	15	WP_011083735.1	12	17	36	10.94	1.2e-19	9	10	22.5	7.69	1.2e-13	14	17	34.8	7.88	5.5e-14	13	14	25.2	8.79	7e-16	2	2	2.9	2.38	3.7e-08	3	4	5.6	6.78	3e-12	6	6	11.8	9	4.2e-16	5	5	11	9.08	1.2e-16	10	15	27.7	7.33	5.7e-13	9	9
[102-2, 789-2]	4	WP_063921375.1	4	6	14.3	7.61	1.7e-13	4	4	14.3	7.69	1.2e-13	3	4	8.6	7.88	5.5e-14	5	5	14.3	8.79	7e-16	2	2	4.4	2.62	3.7e-08	3	3	11.1	6.78	3e-12	3	3	11.1	9	4.2e-16	3	3	11.1	9.08	1.2e-16	3	5	8.6	7.33	5.7e-13	3	3
[789-3]	2	WP_011087085.1	1	1	2.7	5.53	1.2e-09	1	1	2.7	5.23	1.4e-09	3	4	5.8	5.94	2.2e-10	2	2	2.7	4.19	2.9e-08						1	1	2.7	3.09	6.5e-08	1	1	2.7	4.6	9.2e-09	1	1	2.7	5.03	2.4e-09	2	2	5.6	6.01	1.6e-10	1	1
[790]		WP_038965361.1	16	18	38.9	6.7	8.3e-12	16	20	33.6	7.49	2.9e-13	15	18	33	7.61	1.7e-13	17	18	35	7.98	3.6e-14	15	15	33.8	6.84	4.6e-12	18	21	37.8	6.83	4.8e-12	17	18	34.9	7.31	6.3e-13	15	17	29.9	7.39	4.4e-13	18	20	39.6	7.09	1.6e-12	13	14
[790-1]	11	WP_011084175.1	5	5	20.5	8.44	5e-15	7	8	22.7	7.64	2e-14	6	7	26.4	7.68	1.2e-13	6	7	23.6	7.84	6.6e-14	4	4	13	2.5	8.6e-07	7	7	23.6	4.21	8.2e-10	6	7	21.7	4.19	7.1e-09	5	6	18.6	4.64	2.3e-09	7	7	27	8.08	2.3e-14	3	3
[790-2]	13	WP_038965309.1	1	1	4.1	2.96	4.3e-08	4	4	9.1	6.57	1.4e-11	5	5	15.6	3.21	3.9e-08	9	9	22.4	5.19	5.1e-09	3	3	8.2	3.72	6.6e-08	7	7	18	3.9	1.1e-07	3	3	7.8	4.82	4.5e-10	2	2	8	4.27	4e-09	2	2	5.6	1.81	1.4e-07	5	5
[790-3]	6	WP_011086017.1	2	2	7.8	4.83	1.2e-10	3	3	8.7	2.98	1.2e-06	4	4	14.1	5.54	1.7e-10	3	3	10.8	3.78	4.7e-09	3	3	8.7	0.9	1.7e-05	4	4	14.1	2.59	2.3e-07	4	4	14.1	5.15	4.9e-11	3	3	11.1	4.47	1.5e-08	7	7	22.5	5.11	4.6e-10	3	3
[790-4]	5	WP_011087659.1	2	2	5.4	2.46	1.6e-06	4	4	8.3	2.71	1.2e-06	1	1	2.3	1.72	4e-05	3	3	8.3	3.07	1.7e-08	3	3	8.3	1.73	2.1e-06	2	2	5.1	2.13	3.5e-06	2	2	5.1	3.08	8.2e-07	1	1	2.3	2.12	4.8e-06	4	4	13.1	2.53	1.2e-06	2	2
[790-5]	6	WP_039184056.1	1	1	3.3	0.34	8e-05	2	2	6	2.15	3.5e-07	3	3	11.2	4.26	1e-09	2	2	6	2.66	1.7e-08	1	1	2.7	0.5	1.7e-05	1	1	2.7	0.96	0.00025	1	1	2.7	0.25	4.1e-05	1	1	3.3	0.61	5.1e-05	2	2	7.7	0.67	8.4e-05
[791]		WP_011084336.1	18	21	57.8	7.16	1.2e-12	16	17	58.4	7.4	4.2e-13	13	15	46.3	6.78	6.1e-12	16	16	55.4	6.21	6.7e-11	14	15	41.3	6.04	2.6e-11	17	18	54.5	7.42	3.9e-13	20	20	58.4	7.11	1.4e-12	18	19	58.4	7.44	3.6e-13	13	15	44.9	5.31	3.2e-09	16	17
[792]		WP_011086732.1	11	12	28.1	7.83	6.9e-14	12	13	31.2	7.15	8.3e-13	8	9	21.8	4.35	5e-08	12	12	36	6.89	3.7e-12	8	9	19.4	6.13	3.9e-11	17	19	43.6	7.07	1.7e-12	16	17	40.9	8.91	6.8e-16	14	16	36.7	8.51	3.7e-15	11	11	26	7.5	2.8e-13	11	11
[793]		WP_011085252.1	16	19	57.8	7.29	6.9e-13	14	17	47.3	7.97	3.7e-14	15	16	38	7.69	1.2e-13	14	16	48.2	6.06	1.3e-10	12	14	32.2	6.44	2.6e-11	17	21	53.3	8.1	2.2e-14	15	18	47.3	8.09	2.2e-14	13	14	53.9	7.44	3.5e-13	16	19	53.3	7.16	1.2e-12	16	19
[794]		WP_011088164.1	15	27	59.2	8.29	9.5e-15	6	8	32.4	7.41	4e-13	10	16	52.1	8.18	1.5e-14	7	11	40.8	8.25	1.1e-14	11	13	57	7.82	7.2e-14	12	19	57	7.96	3.8e-14	10	16	52.1	8.08	2.4e-14	10	17	37.3	9.56	4.3e-17	9	15	47.2	9.07	3.5e-16	8	12
[795]		WP_011087171.1	15	17	66	14.63	1.8e-26	10	13	53.3	10.39	1.2e-18	13	17	59.3	8.78	1.2e-15	6	8	37.3	10.37	1.4e-18	5	6	32	7.28	7.1e-13	8	9	46.7	12.15	6.9e-22	11	14	49.3	10.3	1.9e-18	9	11	59.3	11.93	1.7e-21	10	16	58	10.64	4.2e-19	8	12
[796]		WP_011084144.1	16	20	42.3	7.6	1.8e-13	16	20	37.1	7.71	1.1e-13	15	19	34.8	7.92	4.6e-14	18	21	41.8	8.49	4.1e-15	13	14	36.3	7.51	2.7e-13	14	16	39.9	8.5	3.8e-15	14	16	39.9	8.32	8.4e-15	13	16	33.9	8.11	2.1e-14	15	20	41	8.15	1.7e-14	15	19
[797]		WP_011083532.1	14	21	51.7	8.58	2.8e-15	11	16	37.2	7.88	5.6e-14	17	22	52.2	7.76	9.3e-14	16	18	51.9	7.52	2.6e-13	14	17	30.6	8.54	3.2e-15	17	21	51.9	8.2	1.4e-14	16	22	42.5	7.9	5e-14	17	21	48.3	7.45	3.5e-13	14	18	43.9	8.41	5.8e-15	14	18
[798]		WP_038965811.1	12	14	28.5	10.33	1.6e-18	16	19	28.8	9.56	4.3e-17	15	18	36.2	9.6	3.7e-17	12	15	24.3	7.89	5.3e-14	9	10	23.6	6.71	7.9e-12	11	14	25.7	8.99	4.9e-16	14	15	33.6	9.81	1.5e-17	13	14	33.2	9.83	1.3e-17	13	14	24.1	10.67	3.8e-19	14	17
[799]		WP_011090257.1	14	18	37.2	7.9	5.2e-14	11	13	30.2	7.73	1e-13	14	17	39.7	8.7	1.7e-15	12	15	33.8	8.68	1.8e-15	12	13	33.8	7.76	9.4e-14	13	17	30.2	8.05	2.7e-14	14	18	33.8	7.46	3.3e-13	15	19	33.8	8.54	3.4e-15	13	16	33.8	8.12	2e-14	13	16
[800]		WP_011088821.1	16	17	43	7.95	4.1e-14	15	18	38.2	7.63	1.6e-13	16	18	39.9	7.17	1.1e-12	19	22	48.6	6.92	3.4e-12	13	15	30.8	5.36	2.4e-10	17	20	50.2	7.35	5.4e-13	14	18	37.7	7.93	4.4e-14	16	18	46.6	8.31	8.9e-15	18	21	46.9	7.7	1.2e-13	16	19
[801]		WP_011085656.1	14	17	25.6	7.44	3.6e-13	14	14	25	8	3.3e-14	16	17	29	7.05	1.9e-12	17	17	27.8	7.3	6.7e-13	9	9	19.5	4.04	1.1e-09	16	16	26.6	8.05	2.7e-14	11	11	17.5	8.97	5.2e-16	13	15	28	8.79	1.1e-15	16	17	28.3	9.02	4.2e-16	17	18
[802]		WP_011085710.1	15	16	60.7	6.83	4.8e-12	13	13	50.9	6.56	1.6e-11	14	14	56.8	6.26	5.6e-11	10	11	38.5	6.29	4.9e-11	16	16	60.7	6.54	1.6e-11	14	14	57.7	6.06	1.3e-10	18	19	62.4	7.06	1.8e-12	18	18	58.1	7.73	1e-13	12	12	57.3	7.43	3.8e-13	11	11
[803]		WP_011090106.1	15	18	40.9	6.9	3.6e-12	14	19	40.4	7.05	1.9e-12	18	22	47	8.26	1.1e-14	14	19	40.4	6.95	2.9e-12	18	21	31.8	6.55	1.6e-11	14	17	43.2	8.04	2.8e-14	12	15	36.9	8.59	2.6e-15	14	20	40.9	8.2	1.4e-14	14	19	40.9	7.43	3.7e-13	12	14
[804]		WP_038966521.1	7	8	28.2	7.68	1.3e-13	7	7	23.4	8.68	1.7e-15	12	13	41.1	7.51	2.7e-13	12	15	43.4	8.31	8.8e-15	5	5	21.2	6.64	3.3e-12	6	6	19.9	6.68	2.1e-12	6	6	21.5	6.85	4.4e-12	11	12	42.1	7.91	4.8e-14	8	8	32.9	7.58	2e-13	8	8
[805]		WP_011086826.1	14	16	55.3	10.91	1.3e-19	5	5	33.2	3.66	6.3e-09	8	8	43.3	7.25	8e-13	6	6	31.3	6	1.7e-10	6	6	36.9	6.22	6.6e-12	8	9	42.4	8.08	2.3e-14	7	8	41.5	8.21	1.4e-14	8	9	49.3	9.66	2.8e-17	6	7	38.2	8.21	1.4e-14	6	6
[806]		WP_063921622.1	18	19	46.4	7.08	1.9e-13	18	19	49.7	5.88	2.7e-10	18	19	48.1	7.83	6.7e-14	15	17	39	6.85	4.4e-12	14	14	41.2	5.86	9.9e-11	19	22	56.3	7.79	8.1e-14	17	17	44.5	6.66	9.8e-12	18	19	46.4	8.06	2.5e-14	16	17	45.1	6.72	7.7e-12	17	18
[807]		WP_038966878.1	14	17	60.2	10.62	4.6e-19	9	9	39.8	6.35	3.7e-11	11	12	47.7	7.12	1.4e-12	7	7	32.9	6.92	3.3e-12	10	10	45.4	8.03	2.9e-14	10	10	39.8	7.9	5.1e-14	11	11	60.2	10.6	5.1e-19	10	10	39.8	7.49	2.9e-13	9	11	47.7	6.36	3.6e-11	12	12
[808]		WP_038966515.1	17	18	40.3	7.51	2.6e-13	8	11	21	6.94	3.1e-12	13	14	29.7	7.59	1.9e-13	10	10	26.7	10.56	5.9e-19	9	10	21.6	5.74	5e-10	14	15	36.5	8.1	2.2e-14	11	12	29.7	7.13	1.3e-12	10	12	25	7.21	9.7e-13	15	18	36.3	7.68	1.3e-13	13	13
[809]		WP_011089983.1	11	14	26.7	8.03	2.9e-14	13	16	28.5	9.95	8e-18	14	17	28.7	11.52	9.8e-21	18	21	39.1	8.44	5.1e-15	11	13	22.8	8.61	2.4e-15	17	21	37.6	8.49	4.1e-15	13	16	29.3	10.98	1e-19	15	18	33.5	10.01	6.3e-18	14	17	33.5	8.5	3.9e-15	13	16
[810]		WP_011090085.1	15	15	27.5	7.61	1.8e-13	13	14	21.5	7.51	2.7e-13	15	15	26.3	6.98	2.6e-12	18	18	30.8	8.71	1.6e-15	18	19	31.5	7.83	6.8e-14	20	21	30.6	7.5	2.8e-13	16	17	29.6	8.28	9.9e-15	16	17	29.4	7.65	1.5e-13	20	21	34.8	7.11	1.5e-12	14	14
[811]		WP_038967202.1	14	18	44.2	7.24	8.4e-13	13	15	40.2	7.6	1.8e-13	15	19	42.8	7.74	9.9e-14	12	14	40.7	6.92	3.2e-12	7	9	23.8	5.1	4e-10	12	13	37.1	7.38	4.7e-13	11	13	38.1	6.91	3.4e-12	10	14	32	7.69	1.3e-13	11	14	35.7	8.68	1.8e-15	11	13
[812]		WP_038965879.1	12	12	24.3	11.92	1.8e-21	13	13	34.3	5.63	3e-10	15	15	35.8	11.01	8.9e-20	15	15	36.9	7.81	2.4e-14	12	12	31.1	5.64	8.4e-11	16	16	35.2	11.07	6.9e-20	10	10	23.2	11.87	2.2e-21	15	15	39	11.61	6.7e-21	8	8	19.6	6.47	1.7e-11	13	13
[813]		WP_011083983.1	14	18	32.5	7.38	4.5e-13	13	16	27.6	7.7	1.2e-13	17	19	39.7	8.98	5e-16	16	19	32.9	8.32	8.4e-15	11	14	27.4	7.55	2.2e-13	15	20	31.6	7.57	2.1e-13	13	16	34.9	7.26	7.8e-13	17	19	37.9	8.41	5.6e-15	16	19	36.8	8.91	6.8e-16	16	19
[814]		WP_011086573.1	15	17	42.1	6.8	5.5e-12	18	19	44.3	8.34	7.9e-15	17	19	43.4	5.98	1.5e-10	13	14	28.3	8.08	2.4e-14	12	13	29.8	6.46	2.3e-11	13	15	28.7	7.62	1.7e-13	18	20	45.3	9.14	2.5e-16	19	21	49.7	9.11	2.9e-16	14	16	34.1	7.1	1.5e-12	16	18
[815]		WP_011090588.1	14	16	32.2	7.73	1.1e-13	16	22	30	7.87	5.8e-14	15	19	30.4	8.37	6.8e-15	16	21	29.4	8.17	1.6e-14	13	15	25.9	7.59	1.9e-13	13	18	26.1	7.88	5.6e-14	14	17	28.3	7.57	2.1e-13	14	16	26.8	6.6	1.3e-11	18	21	38.2	8.12	2e-14	14	18
[816]		WP_011089817.1	14	15	31.4	7.64	1.5e-13	16	18	33.4	7.99	3.5e-14	16	18	35	7.21	9.7e-13	13	13	27.7	5.42	1.9e-09	14	14	32.7	7.59	1.9e-13	14	15	30.2	6.33	4e-11	14	15	35.7	5.85	3.2e-10	11	12	23.6	7.17	1.2e-12	20	22	52	7.66	1.4e-13	19	20
[817]		WP_011089347.1	15	17	45.8	8.57	2.9e-15	15	20	39.2	8.72	1.5e-15	14	18	35.3	7.95	4.1e-14	12	14	34.6	7.3	6.7e-13	16	16	42.9	6.47	2.3e-11	10	12	25.4	7.72	1.1e-13	15	16	38.4	7.99	3.4e-14	15	17	44.9	7.11	1.5e-12	15	19	41.6	7.65	1.5e-13	13	15
[818]		WP_236842132.1	15	18	47.1	11.07	6.8e-20	13	16	35.7	13.58	1.5e-24	12	12	36.1	8.65	2e-15	12	12	36.7	9.67	2.6e-17	11	12	33.5	10.7	3.3e-19	14	17	40.9	13.13	1e-23	13	13	40.9	9.3	1.3e-16	14	16	43.7	7.97	3.8e-14	12	13	38.3	8.36	7.1e-15	13	15
[819]		WP_011083210.1	15	16	29.5	6.59	1.4e-11	16	18	30.6	6.98	2.6e-12	11	12	20	7.77	9e-14	13	13	27.6	6.88	4e-12	13	14	25.4	6.63	1.1e-11	10	11	16.8	7.79	8e-14	13	15	21.9	7.39	4.4e-13	15	19	25.2	7.6	1.8e-13	19	21	30.2	7.28	7e-13	14	15
[820]		WP_011085988.1	14	19	58.2	8.23	1.2e-14	15	18	57.4	6.7	8.4e-12	16	21	66.4	9.63	3.2e-17	13	14	53.9	7.33	5.8e-13	9	10	38.3	6.36	8.4e-12	13	14	49.2	7.38	4.6e-13	14	15	48.8	7.23	8.9e-13	11	13	48.4	6.65	1.1e-11	13	19	53.5	7.87	5.8e-14	13	16
[821]		WP_038966773.1	14	16	26	6.64	9.3e-12	17	19	26.4	7.47	3.1e-13	16	18	28.6	7.57	2.1e-13	13	14	22.3	8.9	7.2e-16	14	16	22.5	7.28	2.2e-13	14	17	23	6.18	9e-12	15	16	26	5.03	2.5e-09	16	20	25.2	6.43	2.6e-11	14	16	25.5	9.3	1.3e-16	16	20
[822]		WP_011089385.1	12	14	24.4	7.59	1.9e-13	14	15	33.5	8.75	1.4e-15	15	16	37.2	9.51	5.3e-17	15	17	41.8	8.89	7.3e-16	11	11	25.9	6.7	8.5e-12	13	14	34.9	7.21	9.5e-13	14	16	36.4	7.09	1.6e-12	16	18	40.1	8.81	1e-15	10	11	24.1	7.28	7e-13	17	18
[823]		WP_011087792.1	12	13	38.5	9.54	4.7e-17	11	12	35.3	7.71	1.1e-13	13	15	43.2	9.34	1.1e-16	11	12	34.6	7.06	1.8e-12	11	12	34.6	7.92	4.6e-14	13	15	42.7	9.52	5.1e-17	15	17	50.3	8.95	5.8e-16	13	16	40.1	8.74	1.4e-15	8	9	27.5	8.75	1.3e-15	11	12
[824]		WP_028175507.1	13	19	44.4	10.35	1.4e-18	10	16	24.6	7.68	1.3e-13	14	19	45.7	10.02	6.1e-18	14	16	38.4	7.07	1.7e-12	15	15	36	11.36	2e-20	15	17	44	11.02	8.4e-20	14	17	35.5	9.86	1.2e-17	18	21	47.6	10.49	8.1e-19	13	16	40.8	8.19	1.5e-14	10	12
[825]		WP_011090328.1	15	19	39.7	9.32	1.2e-16	15	19	23.4	8.29	9.7e-15	12	18	26.2	8.87	8.2e-16	16	19	29.7	7.58	2e-13	16	20	30.8	7.31	1.6e-13	12	15	26.7	6.38	2.5e-11	15	18	32.1	7.85	6.3e-14	14	17	29.3	8.66	2e-15	16	20	33.4	10.08	4.6e-18	14	16
[826]		WP_038950471.1	9	9	3.2	4.89	6.4e-10	23	23	7.3	6.36	3.6e-11	19	19	5.9	5.59	1.1e-10	14	14	4	5.73	4.6e-11	4	4	1.2	1.36	1.4e-05	3	3	0.9	2.73	3.8e-07	4	4	1.2	2.09	1e-06	6	6	1.7	3.66	6.6e-08	16	16	5.7	5.44	7.5e-11	8	8
[827]		WP_011083751.1	10	10	20.2	6.18	7.6e-12	9	9	19.4	7.01	4.5e-13	7	7	13.3	7.28	7.2e-13	17	21	35.3	7.16	1.2e-12	3	3	6.2	1.73	7.3e-07	6	6	14.4	4.64	1.9e-10	10	10	22.4	6.83	3.5e-12	16	17	28.4	7.51	2.6e-13	10	10	21.5	6.83	4.7e-12	4	4
[828]		WP_011088615.1	14	15	32.4	8.43	5.4e-15	14	14	31.4	7.45	3.5e-13	16	17	38.2	7.83	7e-14	15	17	33.1	7.75	9.7e-14	14	15	28.1	7.05	1.9e-12	12	13	26.3	8.01	3.2e-14	14	15	29.8	7.54	2.3e-13	11	11	25.1	7.26	7.6e-13	11	12	27.3	7.47	3.1e-13	12	12
[829]		WP_011088138.1	13	51	77.4	9.43	7.6e-17	11	20	51.4	8.58	2.8e-15	14	29	77.4	7.56	2.1e-13	12	22	77.4	8.04	2.7e-14	13	19	73.4	8.65	2.1e-15	13	29	73.4	8.48	4.2e-15	14	39	77.4	9.57	4.1e-17	13	32	77.4	9.34	1.1e-16	13	28	55.4	7.81	7.4e-14	13	27
[830]		WP_011086814.1	18	22	56.5	7.72	1.1e-13	14	15	61.7	7.29	6.9e-13	14	19	45.2	7.6	1.8e-13	13	14	53.2	6.72	7.9e-12	12	12	41.5	7.33	5.6e-13	13	15	48	7.16	1.2e-12	14	15	50.8	7.32	5.9e-13	14	15	46	6.49	2e-11	16	19	50.8	5.66	4.4e-10	13	14
[831]		WP_011083054.1	14	23	69	8.32	8.5e-15	13	16	56.1	8.07	2.4e-14	14	20	69.8	7.67	1.3e-13	12	15	61.2	8.5	3.9e-15	11	13	54.5	7.92	4.6e-14	13	18	56.1	8.29	9.7e-15	14	18	63.9	8.17	1.6e-14	13	16	69	10.33	1.6e-18	14	18	63.9	8.76	1.3e-15	13	17
[832]		WP_011085289.1	14	15	42.1	9.21	1.9e-16	17	20	47.9	11.89	2e-21	18	21	49.8	7.08	1.5e-12	16	18	44.6	8.2	1.4e-14	14	17	46.7	10.27	2e-18	15	18	44.2	7.42	3.9e-13	14	16	37.4	10.18	3e-18	16	18	47.9	10.87	1.6e-19	15	18	50.7	9.88	1.1e-17	16	18
[833]		WP_038966612.1	17	20	47.7	7.95	4.1e-14	16	18	36.2	9.44	7e-17	16	17	43	9	4.7e-16	15	17	36.2	8.29	9.8e-15	14	15	28.4	8.81	1e-15	16	19	35.7	9.03	4.1e-16	17	19	44.7	9.45	6.8e-17	14	16	38.9	10.93	1.2e-19	16	18	41.7	9.25	1.6e-16	17	20
[834]		WP_038966226.1	15	18	41.1	7.34	5.6e-13	12	12	37.1	7.64	1.5e-13	17	20	45.3	9.39	8.7e-17	8	9	27.6	6.82	5e-12	10	12	31.8	7.55	1.2e-13	9	10	30.8	7.85	6.2e-14	15	17	49.1	8.88	7.6e-16	15	18	38.6	8.54	3.3e-15	14	17	41.6	8.19	1.4e-14	9	11
[835]		WP_011090528.1	16	19	62.3	9.08	3.4e-16	10	14	34.5	7.5	2.7e-13	13	15	54.8	7.36	5e-13	11	13	50.4	7.76	9.1e-14	9	10	39.3	5.29	3.9e-10	9	12	32.5	7.25	8.2e-13	10	14	37.7	7.18	1.1e-12	12	14	43.3	6.73	7.5e-12	10	13	34.5	6.84	4.7e-12	9	12
[836]		WP_038967062.1	12	15	40.5	8.69	1.8e-15	11	13	33.5	6.76	6.5e-12	11	15	32.2	7.92	4.7e-14	13	17	34.1	7.83	6.9e-14	12	12	31.7	6.95	3e-12	14	17	40	8.22	1.3e-14	12	15	30.8	7.38	4.6e-13	10	12	27.6	7.3	6.6e-13	11	14	29.5	7.56	2.2e-13	12	14
[837]		WP_011088177.1	15	18	38.2	11.02	8.4e-20	11	13	34.7	11.37	1.9e-20	16	21	39.8	8.18	1.5e-14	10	11	23.7	11.51	1e-20	16	18	44.6	8.32	8.3e-15	14	18	40.1	8.48	4.2e-15	15	23	41.4	10.73	2.9e-19	15	22	39	11.14	5e-20	11	17	35.5	11.28	2.8e-20	12	17
[838]		WP_011084296.1	15	16	65.5	7.92	4.6e-14	9	10	43.9	7.93	4.5e-14	11	11	56.1	7.75	9.7e-14	12	12	60.8	8.18	1.5e-14	8	9	38.6	5.66	1.2e-10	14	16	67.8	7.23	8.7e-13	12	14	63.2	7.99	3.4e-14	11	12	54.4	8.39	6.3e-15	12	12	56.1	7.71	1.1e-13	15	16
[839]		WP_028173081.1	14	16	44.5	9.43	7.3e-17	15	18	46.6	9.15	2.4e-16	13	15	37.7	8.29	9.5e-15	14	16	42.6	8	1.8e-14	13	13	40.4	6.84	6.2e-13	17	20	47.2	7.3	6.5e-13	13	16	41	8.7	1.7e-15	16	19	46.6	7.84	6.5e-14	13	15	37.7	9.36	1e-16	18	19
[840]		WP_011085925.1	8	11	23.9	7.32	5.9e-13	12	14	28.7	9.76	1.8e-17	10	13	28.7	9.04	3.8e-16	11	15	33.9	8.79	1.2e-15	9	11	30.6	8.06	2.5e-14	11	14	31.1	7.67	1.4e-13	13	16	36.3	8.78	1.2e-15	12	14	32.2	9.3	1.3e-16	10	12	30.6	9.05	3.8e-16	9	11
[841]		WP_011090269.1	14	16	25.4	7.32	5.9e-13	14	16	23.3	7.51	2.7e-13	14	16	30.5	6.73	7.5e-12	14	16	24	7.94	4.3e-14	14	15	27.8	6.35	3.8e-11	16	17	27.4	7.55	2.3e-13	15	18	29.5	7.25	8.1e-13	17	17	32.5	7.55	2.3e-13	14	16	31.2	8.45	4.8e-15	16	18
[842]		WP_011085233.1	14	28	65.3	9.55	4.4e-17	10	14	44.3	8.91	6.7e-16	14	20	62.9	7.37	4.9e-13	12	13	62.9	8.69	1.8e-15	9	12	47.9	6.12	9.9e-11	11	16	56.3	9.36	1e-16	13	22	77.2	9.75	1.9e-17	13	21	47.9	9.56	4.3e-17	13	20	62.9	9.61	3.4e-17	12	16
[843]		WP_028175825.1	12	12	29.7	10.9	1.4e-19	14	15	28.3	8.56	3e-15	16	16	41.3	10.06	5.1e-18	13	13	31.7	9.51	5.3e-17	12	12	28.1	5.07	6.8e-10	12	12	36.4	9.99	6.8e-18	9	9	21.3	8.73	1.5e-15	13	13	26.1	8.4	5.9e-15	13	14	35.5	11.18	4.2e-20	12	14
[843-1]	1	decoy	1	1	0.8	1.17	3.2e-05	1	1	0.8	1.98	7.4e-06	1	1	0.8	1.53	1.7e-05	1	1	0.8	1.9	1.4e-05	2	2	3.7	1.49	3.5e-05	1	1	0.8	1.85	1.3e-05	1	1	0.8	2.05	6.5e-06											1	1
[844]		WP_011088122.1	12	17	44.4	8.55	3.1e-15	15	21	42	10.45	9.8e-19	11	15	31.1	9.23	1.7e-16	13	15	34.1	8.35	7.4e-15	7	8	24.2	6.09	1.2e-10	13	15	38.5	8.15	1.8e-14	15	19	47.4	8.01	3.2e-14	15	20	46.7	9.7	2.4e-17	15	19	43.5	9.22	1.8e-16	14	17
[845]		WP_011088748.1	16	18	60.3	6.87	4.2e-12	12	14	37.7	7.38	4.7e-13	14	14	60.6	6.08	1.2e-10	16	17	61.3	7.45	3.5e-13	13	14	40.6	8.1	2.2e-14	20	22	64.5	7.23	8.7e-13	15	16	52.9	6.59	1.4e-11	10	11	43.5	6.6	1.3e-11	15	16	52.3	7.69	1.2e-13	11	12
[846]		WP_011088947.1	16	22	29.2	9.71	2.2e-17	13	15	23.8	7.35	5.3e-13	14	20	24.7	7.44	3.6e-13	15	15	24.9	6.75	6.9e-12																					17	23	31.8	10.06	5.1e-18	16	19
[847]		WP_038966123.1	12	14	27.2	8.26	1.1e-14	16	17	40.3	8.11	2.1e-14	15	16	34.6	7.76	9.3e-14	15	17	36.6	7.13	1.4e-12	12	14	32.5	6.97	2.6e-12	10	11	23.3	7.06	1.8e-12	15	16	36.4	8.32	8.6e-15	16	17	38	8.37	6.9e-15	17	19	42.7	9.12	2.8e-16	14	16
[848]		WP_011084978.1	16	20	39.1	8.93	6.2e-16	12	13	25.9	7.32	5.9e-13	11	11	28.9	7.51	2.7e-13	9	10	23.4	6.89	3.7e-12	16	17	32.9	7.21	5.4e-13	16	17	36.6	7.09	1.6e-12	15	16	35.6	7.59	1.9e-13	19	19	42.6	8.91	6.8e-16	12	14	29.2	7.24	8.4e-13	9	9
[849]		WP_011085322.1	18	25	55	6.93	3.1e-12	16	21	50.2	7.53	2.5e-13	15	19	42.1	6.78	6e-12	15	20	41.5	6.64	1.1e-11	14	17	43.4	8.84	9e-16	16	22	52.1	9.93	8.6e-18	14	19	44.7	7.61	1.7e-13	15	21	46.6	7.72	1.1e-13	13	18	38.9	7.06	1.8e-12	16	21
[850]		WP_011083507.1	14	15	32.9	8.91	6.7e-16	12	13	28.6	12.03	1.2e-21	12	12	30.8	11.04	7.6e-20	11	12	33.4	10.48	6.4e-19	11	11	26.5	6.24	6.1e-11	15	16	44.3	10.33	1.6e-18	15	16	35.5	8.97	5.4e-16	16	18	37.7	9.74	2e-17	14	14	39.5	11.34	2.1e-20	13	15
[851]		WP_011086802.1	14	17	44.7	10.63	4.4e-19	10	10	27.4	7.64	1.6e-13	15	16	38.1	9.73	2.1e-17	13	14	34.3	8.35	7.5e-15	12	12	35.3	5.74	2.5e-11	12	12	35.3	9.06	3.5e-16	12	14	34.5	9.97	7.5e-18	11	11	34.5	9.94	8.5e-18	12	14	34.8	7.62	1.6e-13	11	13
[852]		WP_038965786.1	15	16	36.6	6.13	7.9e-11	16	18	38.1	7.03	2.1e-12	17	18	39.7	6.59	1.4e-11	18	19	40	7.64	1.5e-13	7	8	21.4	6.83	4.9e-12	12	13	33.6	8.49	4.1e-15	15	17	33.9	7.36	3.2e-14	13	13	33.4	7.04	2e-12	15	16	36.8	6.34	3.9e-11	15	16
[853]		WP_011083779.1	9	9	24.4	7.56	2.2e-13	6	6	14.8	6.29	6.3e-13	14	14	39.3	8.06	1.5e-14	12	14	36.8	7.55	5.9e-14	1	1	4.2	0.14	0.00011	4	4	12.6	6.75	1.5e-12	7	7	24	5.15	6.4e-11	12	13	35.6	7.73	1.1e-13	8	8	27.2	7.6	1.8e-13	4	4
[854]		WP_011085701.1	12	17	42.9	9.16	2.3e-16	13	17	45.4	8.58	2.8e-15	13	19	47.6	8.6	2.6e-15	15	20	50.1	8.86	8.6e-16	14	18	45.7	8.25	1.1e-14	13	19	48.2	8.09	2.3e-14	12	18	40.6	7.71	1.1e-13	13	19	45.4	8.32	8.5e-15	13	18	42.9	8.96	5.6e-16	13	17
[855]		WP_051000248.1	17	20	36.7	8.41	5.7e-15	16	18	34.8	7.96	4e-14	16	18	30.8	8.12	2e-14	16	17	29.8	5.08	1.5e-09	11	12	27.7	8.49	4.1e-15	15	17	28.8	6.62	1.2e-11	16	18	35.8	7.3	6.4e-13	16	18	30.8	8.34	7.8e-15	15	16	29.8	7.93	4.4e-14	12	13
[856]		WP_011086762.1	14	14	37.6	8.63	2.3e-15	16	16	44.3	8.49	4.1e-15	16	16	35.1	8.21	1.4e-14	17	17	43.6	7.45	3.5e-13	11	11	27	7.92	4.6e-14	14	14	31.6	9.73	2.1e-17	14	14	35.3	9.44	7e-17	13	13	33.9	9.45	6.8e-17	15	15	34.2	9.48	6e-17	11	11
[857]		WP_011088150.1	14	30	59.2	9.08	3.3e-16	7	11	32.5	8.2	1.4e-14	11	16	59.7	7.42	3.8e-13	11	14	44.7	7.64	1.5e-13	11	14	51.5	8.63	2.2e-15	12	17	57.8	8.23	1.2e-14	14	23	62.6	7.78	8.5e-14	11	18	49.5	8.3	9.1e-15	14	28	63.6	8.39	6.3e-15	11	17
[858]		WP_011084804.1	9	9	28.3	7.6	1.8e-13	15	16	39.6	6.6	1.3e-11	13	13	35.7	7.05	1.9e-12	11	11	33	6.98	2.6e-12	13	15	37.8	7	2.3e-12	17	18	43.4	7.42	3.9e-13	15	15	40	7.68	1.3e-13	14	14	35.7	9.19	2e-16	12	12	31.9	6.95	2.9e-12	10	10
[859]		WP_008136357.1	10	38	70.7	10.64	4.3e-19	8	9	40.2	10.46	9.1e-19	10	13	70.7	12.76	5e-23	9	11	50	9.91	9.8e-18	7	8	48.9	9.64	3.1e-17	8	11	48.9	10.58	5.4e-19	9	17	70.7	10.96	1.1e-19	10	18	70.7	11.83	2.7e-21	10	18	62	12.29	3.7e-22	8	9
[860]		WP_011086026.1	14	16	40.1	6.44	2.6e-11	14	16	40.1	7	2.4e-12	16	18	39.8	7.28	7e-13	15	17	35.3	7.48	3e-13	10	10	29.7	6.16	8.3e-11	14	15	34.2	6.85	4.5e-12	16	17	47.7	6.74	7e-12	18	18	43.5	8.78	1.2e-15	11	14	31.1	6.51	1.9e-11	14	17
[861]		WP_011085762.1	16	16	21.5	7.34	5.6e-13	17	17	24.6	7.59	1.9e-13	16	16	25.8	7.08	1.7e-12	14	14	20.1	6.63	3.8e-13	12	12	16.4	6.04	8.6e-12	16	16	22	6.58	1.1e-12	11	11	16.1	7.21	6.3e-13	15	15	24.7	7.3	4e-13	17	17	27.7	7.41	4.2e-13	16	16
[862]		WP_038967463.1	12	14	42.6	7.73	1.1e-13	13	16	43.9	7.67	1.3e-13	13	15	33.8	8.03	2.9e-14	9	11	26	5.17	2.8e-10	11	12	33.5	6.6	1.9e-12	13	16	43.1	7.46	2.5e-13	15	19	47	7.48	3.1e-13	14	15	47	7.18	1.1e-12	13	15	39	7.91	4.9e-14	13	15
[863]		WP_011088804.1	16	24	54.2	8.03	2.9e-14	11	15	42	7.97	3.7e-14	14	17	47.4	8.8	1.1e-15	13	15	56.1	7.5	2.8e-13	8	10	28.9	7.62	1.7e-13	13	16	52.6	7.62	1.7e-13	11	15	39.2	7.24	8.3e-13	9	12	27.5	7.67	1.3e-13	13	20	42.2	7.32	5.9e-13	13	19
[864]		WP_011087318.1	17	18	24.2	5.22	4.7e-09	18	21	25.4	7.57	2.1e-13	17	17	23	6.28	5.1e-11	16	17	25.1	7.99	3.5e-14	16	17	24.8	4.4	4.2e-09	18	19	26.7	8.17	1.6e-14	15	17	23.3	7.54	2.3e-13	15	17	23.3	6.37	3.4e-11	14	15	21.4	8.19	1.5e-14	17	19
[865]		WP_011088777.1	14	17	43.4	10.26	2.1e-18	13	14	54.3	10.07	4.9e-18	13	16	49.8	9.98	7.1e-18	14	15	54.3	9.83	1.4e-17	9	10	43.4	8.62	2.4e-15	15	16	46.8	10.05	5.2e-18	15	16	50.2	10.24	2.3e-18	14	16	50.2	9.84	1.3e-17	14	17	51.7	9.86	1.2e-17	15	16
[866]		WP_063921647.1	13	16	54.2	12.12	7.9e-22	9	10	41.5	7.19	1.1e-12	11	13	44.6	7.28	7.1e-13	8	10	38.5	7.13	1.3e-12	7	7	31.5	6.12	9.9e-11	9	11	38.5	7.32	5.9e-13	11	13	43.8	7.5	2.8e-13	12	14	44.6	7.44	3.6e-13	15	18	62.3	9.78	1.7e-17	9	11
[867]		WP_008549252.1	14	43	72.3	8.85	8.7e-16	11	17	64.2	8.15	1.8e-14	14	32	72.3	9.33	1.2e-16	12	20	69.3	8.23	1.3e-14	12	16	69.3	8.09	2.2e-14	10	16	64.2	8.14	1.8e-14	13	25	69.3	8.03	2.9e-14	13	25	69.3	10.31	1.7e-18	9	22	59.9	9.51	5.3e-17	9	17
[868]		WP_011083394.1	16	21	50.1	7.92	4.6e-14	11	14	40.2	6.49	2.1e-11	12	15	43.4	7.68	1.3e-13	9	10	33.3	3.81	2.5e-08	12	13	39.5	7.32	5.9e-14	12	14	37.5	7.79	8.2e-14	15	18	58.6	7.28	7e-13	13	15	54.6	8.16	1.7e-14	11	14	37.7	8.09	2.3e-14	10	10
[869]		WP_011085352.1	13	15	49.8	10.94	1.2e-19	10	10	35.9	12.13	7.4e-22	11	13	37.5	11.52	9.9e-21	12	14	49.5	9.67	2.7e-17	10	11	36.9	7.35	5.3e-13	14	15	52.8	10.84	1.8e-19	9	11	37.9	7.38	4.7e-13	10	10	50.5	12.23	4.9e-22	12	15	51.8	9.47	6.1e-17	11	13
[870]		WP_038965061.1	10	17	47.4	9.44	7.2e-17	11	15	57.4	8.65	2.1e-15	11	17	51.8	8.48	4.3e-15	10	15	40.6	8	3.3e-14	8	11	43.8	8.11	2.1e-14	13	19	57.4	9.48	5.9e-17	11	18	51.8	8.44	5e-15	14	19	57.4	9.23	1.7e-16	10	13	45	8.2	1.4e-14	9	13
[871]		WP_011088156.1	17	17	21.9	9.16	2.3e-16	16	17	28.1	9.92	9e-18	16	17	21.2	9.89	1e-17	18	21	26.1	6.24	5.9e-11	13	14	17	6.25	5.8e-11	13	14	19.4	7.47	3.2e-13	17	17	23.9	9.47	6.3e-17	16	18	23.7	10.62	4.7e-19	13	13	21.8	10.07	4.8e-18	14	16
[872]		WP_063921598.1	14	17	51.3	8.24	1.2e-14	15	17	43	7.34	5.6e-13	13	14	36	9.47	6.2e-17	14	17	42.5	8.64	2.1e-15	9	9	26.3	5.12	1.3e-09	11	11	26.5	7.18	1.1e-12	15	16	54.4	7.85	6.4e-14	14	15	45.4	7.54	2.4e-13	15	17	39.5	8.31	8.7e-15	12	13
[873]		WP_038967112.1	15	17	59	6.98	2.6e-12	9	11	30	6.6	1.3e-11	11	12	36.1	8.59	2.6e-15	13	13	43.7	9.94	8.4e-18	10	10	29.1	5.28	2.1e-10	11	11	37.9	8.41	5.7e-15	11	12	41.3	10.87	1.6e-19	12	14	41	7.76	9.2e-14	12	14	45	6.27	5.4e-11	15	16
[874]		WP_011083502.1	15	15	42.8	11.24	3.3e-20	9	11	29.8	7.53	2.4e-13	13	13	27.9	8.97	5.2e-16	8	8	22.1	7.01	2.2e-12	15	15	36.7	5.91	1.2e-10	14	14	49.2	10.52	7.3e-19	12	13	33.1	8.07	2.5e-14	13	13	41.2	8.52	3.6e-15	13	13	49.7	8.05	2.6e-14	10	10
[875]		WP_011088084.1	16	16	24.6	9.59	3.7e-17	13	13	19	8.67	1.9e-15	15	15	20.2	7.52	2.5e-13	11	11	16	8.93	6.2e-16	15	15	20.9	5.85	5.6e-12	16	16	23.5	9.52	5.1e-17	17	17	25.7	7.83	6.9e-14	16	16	23.8	9.08	3.3e-16	18	18	25.8	8.95	5.7e-16	13	13
[876]		WP_011084293.1	12	12	29.5	6.22	6.6e-11	12	12	27.2	5.93	2.2e-10	13	13	35	6.46	2.4e-11	12	12	31.6	6.87	4.1e-12	11	11	31	7.58	2e-13	17	18	42.8	6.3	4.6e-11	18	20	46.2	7.83	6.7e-14	17	19	40.1	7.69	1.3e-13	11	11	30.6	7.18	1.1e-12	11	12
[877]		WP_011085713.1	16	18	56.5	7.44	3.7e-13	10	10	32.7	5.95	2.1e-10	14	15	52.3	8.74	1.4e-15	11	12	48.5	8.59	2.6e-15	10	11	33.8	7.44	3.6e-13	12	13	55.8	9.26	1.6e-16	11	12	45	7.33	5.7e-13	13	13	47.3	8.56	3.1e-15	13	14	50.4	8.55	3.2e-15	15	15
[878]		WP_028173009.1	14	17	54.3	8.84	9.1e-16	9	10	26.7	6.45	2.4e-11	7	8	19.5	6.12	1e-10	11	14	35.3	8.01	3.2e-14	8	9	25	5.3	1.9e-10	10	10	29.3	6.72	7.8e-12	8	9	30.2	8.48	4.2e-15	9	10	27.3	8.85	8.8e-16	12	15	31	8.56	3e-15	11	12
[879]		WP_011083218.1	15	19	47.4	8.59	2.7e-15	13	16	46.4	9.3	1.3e-16	11	14	40.3	8.58	2.8e-15	14	17	50.7	9.27	1.5e-16	13	16	49.8	8.04	2.8e-14	13	17	47.4	8.47	4.5e-15	11	14	44.5	8.45	4.8e-15	13	17	46.4	9.71	2.3e-17	12	16	46.4	7.88	5.6e-14	11	15
[880]		WP_011084213.1	17	21	43.1	7.68	1.3e-13	14	19	48.9	8.6	2.5e-15	15	19	37.3	6.63	1.1e-11	13	16	36	7.8	7.9e-14	13	17	50.8	7	2.3e-12	16	20	46	9.58	3.9e-17	14	18	45.7	8.03	2.9e-14	15	20	49.5	7.86	6e-14	13	19	44.1	6.97	2.7e-12	13	17
[881]		WP_038967446.1	14	18	58.2	10.42	1.1e-18	14	17	51.9	9.2	2e-16	11	15	47.4	9.84	1.3e-17	11	12	44	11.86	2.4e-21	8	9	45.5	2.83	1.2e-07	8	9	44	9.97	7.3e-18	8	11	47	6.03	1.1e-10	8	11	47	6.69	8.8e-12	14	20	65.3	10.71	3.2e-19	12	16
[882]		WP_038965110.1	14	17	31.1	8.43	5.3e-15	15	17	33.9	7.87	5.7e-14	14	16	28.8	6.84	4.6e-12	15	18	33	7.23	8.9e-13	12	13	27.4	6.87	4.1e-12	16	17	29.5	8.05	2.7e-14	12	13	28.5	8.52	3.6e-15	15	18	33.9	7.85	6.1e-14	14	18	29.4	7.43	3.7e-13	13	16
[883]		WP_011088676.1	13	17	41.7	7.89	5.2e-14	13	16	34.3	8.73	1.5e-15	14	20	45.3	7.86	6e-14	11	12	38.5	8.64	2.1e-15	8	9	26.9	9.09	3.1e-16	15	18	49.5	8.5	3.9e-15	15	20	42.1	8.68	1.8e-15	14	18	41.7	8.38	6.6e-15	14	17	58.9	9.15	2.5e-16	14	16
[884]		WP_011083547.1	16	19	55.7	8.39	6.2e-15	16	20	50.9	8.59	2.7e-15	18	22	51.5	8.67	1.9e-15	15	19	44.3	7.77	8.7e-14	17	20	54.8	7.72	1.1e-13	17	20	56.6	7.37	4.9e-13	16	20	45.5	8.4	6e-15	17	20	56.9	6.38	3.3e-11	15	17	47.6	7.98	3.6e-14	18	20
[885]		WP_011084238.1	13	17	40.6	11.63	6.2e-21	12	17	30.4	8.78	1.2e-15	14	19	41.3	11.03	8.1e-20	13	16	34.3	8.5	4e-15	11	13	31.1	7.34	5.4e-13	12	15	44.8	10.04	5.6e-18	13	18	39.2	8.68	1.8e-15	14	21	34.3	7.55	2.2e-13	11	16	37.8	6.79	5.8e-12	12	15
[886]		WP_011085092.1	12	14	30.8	7.41	4e-13	11	12	27.6	6.63	1.2e-11	14	18	37.2	9.82	1.4e-17	16	19	41.3	9.27	1.5e-16	6	6	17.4	4.96	4.6e-10	13	14	30.1	4.92	1.7e-08	12	12	36.7	6.58	9.2e-12	12	14	31.5	6.83	4.9e-12	15	19	37.2	6.6	1.3e-11	16	17
[887]		WP_011090002.1	14	20	78.7	8.88	7.9e-16	3	3	20.3	4.43	3.5e-09	6	7	40.6	5.85	3.2e-10	4	4	29.2	4.44	1e-09	6	6	40.6	6.07	1.2e-10	9	11	50.5	7.67	1.3e-13	9	10	49.5	7.4	4.3e-13	11	15	57.9	7.31	6.1e-13	5	5	35.6	6.48	2.1e-11	4	4
[888]		WP_011085815.1	12	13	37.9	9.71	2.3e-17	17	19	48.1	8.81	1e-15	14	17	36.7	9.13	2.6e-16	12	13	36.2	8.62	2.3e-15	12	12	38.9	9.82	1.4e-17	11	13	30.7	7.78	8.6e-14	12	14	30.2	9.89	1.1e-17	11	13	39.9	8.94	6.1e-16	12	15	33.6	7.74	1e-13	14	16
[889]		WP_011084132.1	13	18	48.1	10.38	1.3e-18	10	12	24.8	8.1	2.1e-14	13	17	41.3	7.19	1.1e-12	13	16	40.7	6.81	5.2e-12	10	13	34.5	7.68	1.3e-13	15	20	45.7	9.06	3.6e-16	13	17	45	8.42	5.6e-15	12	16	49.7	9.67	2.6e-17	11	15	41.9	7.53	2.5e-13	12	15
[889-1]	12	WP_011085791.1	9	9	22.7	6.54	5.5e-12	10	10	25	6.19	5.9e-11	11	12	35.1	7.12	1.4e-12	9	9	22.7	5.27	5.6e-10	6	6	17.2	5.62	8e-11	12	12	32.5	6.17	7.9e-11	11	11	37.3	6.12	9.5e-11	10	10	27.3	8.13	1.9e-14	8	9	20.5	6.74	3.7e-12	11	11
[890]		WP_038966601.1	14	17	24.1	9.75	1.9e-17	15	20	25.3	6.96	2.8e-12	14	18	25.8	9.94	8.6e-18	17	21	28.4	7.99	3.5e-14	13	14	23.4	7.58	2e-13	17	20	29.6	6.21	6.8e-11	14	17	24.8	6.72	7.8e-12	13	17	23.5	8.12	2e-14	16	22	28.7	10.68	3.7e-19	15	20
[891]		WP_014491764.1	14	27	81.3	11.39	1.8e-20	8	14	42.4	7.5	2.8e-13	10	16	53	9.95	8.2e-18	9	15	57.6	11.71	4.4e-21	9	13	48.5	8.14	1.8e-14	12	23	78.8	10.65	4.1e-19	9	15	53	10.45	9.7e-19	11	19	69.2	10.94	1.2e-19	11	20	68.2	10.91	1.3e-19	10	18
[892]		WP_011086571.1	11	13	28.7	8.29	9.6e-15	13	14	29.3	6.52	1.8e-11	14	16	34.6	8.76	1.3e-15	17	20	36.1	8.58	2.8e-15	16	19	34.8	7.54	2.3e-13	15	18	36.5	7.33	5.8e-13	18	19	35.2	9.05	3.8e-16	19	21	32.4	8.88	7.9e-16	14	16	35.4	8.37	6.9e-15	14	17
[893]		WP_011088876.1	13	20	42.6	8.55	3.2e-15	10	16	42.6	8.96	5.5e-16	13	20	42.6	8.09	2.2e-14	12	16	48	8.94	6e-16	10	12	42.6	8.36	7e-15	13	18	49	9.89	1.1e-17	8	13	42.6	8.15	1.7e-14	10	15	42.6	8.62	2.3e-15	9	12	41.6	9.06	3.6e-16	12	16
[894]		WP_011090684.1	9	12	42.9	8.78	1.2e-15	8	11	44.6	6.42	2.8e-11	6	6	40	7.57	2.1e-13	11	13	51.4	7.58	1.9e-13	8	8	48.6	7.25	8e-13	15	20	64.6	7.69	1.2e-13	12	19	64.6	9.39	8.8e-17	11	15	44	7.87	5.8e-14	11	13	58.3	7.55	2.3e-13	10	13
[894-1]	11	WP_011087408.1	8	11	52.6	9.9	1e-17	8	11	48.6	10.65	4.1e-19	8	11	56.6	9.74	2e-17	9	12	64.7	7.22	9.3e-13	7	7	56.1	7.88	5.5e-14	8	11	52.6	7.54	2.3e-13	8	10	52.6	7.42	3.9e-13	9	12	61.3	10.44	1e-18	8	13	64.2	7.28	7.3e-13	11	16
[895]		WP_011087577.1	17	19	40.9	6.56	1.5e-11	12	15	35.9	8.26	1.1e-14	13	17	40.7	7.09	1.6e-12	8	9	21.1	7.25	8.2e-13	11	12	36.5	7.76	9e-14	14	17	38	7.16	1.2e-12	12	14	37.4	7.36	5e-13	15	18	37.1	7.64	1.6e-13	13	15	48.7	10.09	4.4e-18	16	19
[896]		WP_008142802.1	14	25	92.9	8.76	1.3e-15	9	11	74.1	8.34	7.8e-15	9	14	74.1	8.14	1.8e-14	9	12	74.1	8.14	1.8e-14	9	10	74.1	8.49	4.1e-15	9	11	84.8	8.2	1.4e-14	9	10	64.3	8.47	4.4e-15	9	13	64.3	8.91	6.7e-16	11	20	84.8	8.58	2.8e-15	10	12
[897]		WP_011084235.1	14	14	13.5	6.72	7.8e-12	19	19	16.1	6.37	3.4e-11	15	16	15.9	7.74	1e-13	20	20	17.5	7.14	1.3e-12	12	12	10.2	6.15	4.9e-12	15	15	13	6.94	3e-12	13	13	12.5	6.94	3e-12	15	15	14	6.92	3.3e-12	16	16	14.6	7.01	2.2e-12	20	20
[898]		WP_011087741.1	10	13	25.5	8.78	1.2e-15	10	12	31.9	8.41	5.8e-15	7	10	14.5	10.66	3.9e-19	8	9	22.2	6.96	2.8e-12	10	12	29.8	7.39	4.5e-13	8	9	18.1	7.47	3.2e-13	12	14	37	9.68	2.6e-17	8	11	29.8	8.8	1.1e-15	11	14	30.6	9.63	3.1e-17	12	15
[899]		WP_011087466.1	12	31	57.3	11.25	3.1e-20	10	19	56.7	13.02	1.7e-23	10	19	62.8	11.03	8.1e-20	9	14	37.8	7.32	5.9e-13	8	12	39	7.85	6.3e-14	10	16	55.5	13.88	4.4e-25	10	19	57.3	11.45	1.3e-20	11	20	57.9	11.4	1.6e-20	10	20	57.9	10.78	2.3e-19	13	21
[900]		WP_011087781.1	13	16	37.4	8.96	5.6e-16	12	17	37.4	9.41	7.9e-17	12	16	30.4	9.91	9.4e-18	12	17	30.4	7.79	8.2e-14	8	11	31.3	7.42	3.9e-13	11	17	31.9	7.8	7.7e-14	13	19	37.4	8.66	2e-15	11	14	30.4	8.75	1.3e-15	12	18	37.1	8.31	8.7e-15	12	15
[901]		WP_011089866.1	9	10	20.6	7.48	3e-13	16	18	31.5	7.33	5.8e-13	11	12	21	7.08	1.7e-12	17	18	34.5	7.45	3.5e-13	13	13	31.5	7.63	1.6e-13	14	14	28.1	8.08	2.3e-14	11	11	20	6.78	6.1e-12	14	16	25.5	8.2	1.4e-14	12	13	26.5	7.07	1.8e-12	14	14
[902]		WP_038967295.1	12	15	46.4	6.7	8.3e-12	11	13	42.7	6.22	6.6e-11	10	10	28.8	5.84	3.3e-10	17	19	57.9	7.09	1.6e-12	11	12	36.8	7.3	6.5e-13	16	19	65.6	6.93	3.2e-12	12	14	42.4	6.83	4.8e-12	12	15	46.4	7.13	1.4e-12	14	15	56.7	6.43	2.7e-11	15	17
[903]		WP_011086125.1	16	17	28.3	8.75	1.4e-15	13	14	24.2	5.77	4.5e-10	15	15	29.4	8.51	3.8e-15	17	18	29.8	7.55	2.2e-13	5	5	8.6	4.61	4.6e-09	7	7	11.4	3.58	2.4e-08	7	7	15.4	7.57	2.1e-13	10	10	19.7	7.47	3.2e-13	13	14	24.9	5.53	1.3e-09	11	11
[904]		WP_236842177.1	13	15	56.8	9.44	7.2e-17	11	12	52.1	9.27	1.5e-16	10	13	30.5	8.99	4.9e-16	12	14	54.6	11.94	1.7e-21	11	14	53	9.05	3.8e-16	15	17	47.9	11.47	1.2e-20	12	15	49.2	8.81	1e-15	11	12	40	8.7	1.7e-15	10	12	39	8.46	4.7e-15	12	13
[905]		WP_028171841.1	13	17	52.8	8.87	8.2e-16	9	9	38.4	6.6	1.3e-11	8	8	36.8	6.34	3.9e-11	7	7	28.4	7.16	1.2e-12	6	6	33.2	6.57	8e-12	8	9	33.6	8.01	3.2e-14	8	8	38.4	6.74	7.2e-12	12	13	55.2	7.32	6e-13	6	7	31.6	7.61	1.7e-13	8	8
[906]		WP_011084989.1	17	17	46.5	7.96	4e-14	14	14	38.8	6.81	5.4e-12	16	17	44.4	7.78	8.5e-14	11	11	37	8.69	1.7e-15	10	10	24.5	4.21	1.8e-08	12	12	34.9	7.17	4.1e-13	16	16	39.9	9.08	3.4e-16	14	14	42.2	9.58	4e-17	16	16	44.2	10.32	1.7e-18	17	17
[907]		WP_011082931.1	12	12	25.9	8.05	2.6e-14	16	18	27.2	7.97	3.8e-14	16	17	33.6	8.94	6.1e-16	13	15	25.7	7.96	3.9e-14	12	13	25.7	7.39	4.5e-13	12	14	20.9	7.57	2.1e-13	13	14	25.1	9.66	2.8e-17	14	15	25.7	8.68	1.8e-15	11	13	23.1	8.89	7.3e-16	13	14
[908]		WP_039187079.1	15	16	47.7	7.78	8.6e-14	13	14	43.7	7.07	1.7e-12	11	12	34.1	7.59	1.9e-13	10	10	35.5	6.88	3.9e-12	7	7	22.2	6.97	2.7e-12	12	12	41.2	7.93	4.5e-14	13	14	45.9	7.04	2e-12	11	12	36.6	7.75	9.5e-14	11	12	35.5	7.65	1.5e-13	9	9
[909]		WP_011085290.1	12	17	37.4	12.15	6.8e-22	8	9	37.4	9.03	4.1e-16	10	14	37.4	12.17	6.4e-22	6	7	30.1	13.54	1.8e-24	7	7	27.2	10.63	4.4e-19	9	11	36.4	12.63	8.7e-23	7	11	25.7	9.87	1.1e-17	9	11	37.4	13.61	1.4e-24	9	10	36.4	12.54	1.3e-22	8	10
[910]		WP_011087074.1	12	14	35.9	8.92	6.6e-16	15	18	43.9	8.02	3e-14	15	16	36.8	8.3	9.1e-15	14	17	39.8	8.9	7.1e-16	10	11	31.7	6.73	7.4e-12	14	15	38.5	7.07	1.7e-12	13	14	29.8	6.88	3.8e-12	13	15	35.9	9.15	2.5e-16	13	13	43.7	8.89	7.4e-16	16	17
[911]		WP_038966109.1	16	20	40.9	7.71	1.1e-13	15	19	37.7	7.25	8.2e-13	15	19	48.9	7.21	9.5e-13	14	17	38.3	7.99	3.4e-14	13	15	48.9	7.39	4.4e-13	14	17	42.8	7.9	5.1e-14	14	16	40.9	7.14	1.3e-12	16	17	40.9	8.75	1.3e-15	16	20	40.3	6.71	8.2e-12	14	15
[912]		WP_011085936.1	13	15	34.8	8.64	2.2e-15	15	18	40.9	6.94	3.1e-12	14	16	37.5	8.59	2.7e-15	13	15	36.3	6.62	4.8e-12	15	16	37.9	6.65	6.9e-12	15	18	39.5	9.16	2.3e-16	15	18	38.1	7.59	1.9e-13	14	17	34.3	9.06	3.6e-16	16	18	41.5	8.61	2.4e-15	13	16
[913]		WP_028171331.1	10	27	80.3	10.74	2.8e-19	10	18	80.3	7.75	9.5e-14	9	22	80.3	9.41	7.9e-17	9	15	80.3	7.82	7.1e-14	10	13	80.3	8	3.3e-14	9	13	80.3	7.92	4.6e-14	8	16	80.3	8.5	3.9e-15	9	18	80.3	8.36	7.2e-15	10	25	86.4	8.99	4.8e-16	10	21
[914]		WP_011088624.1	13	21	43.6	7.91	4.8e-14	13	22	43.6	8.57	2.9e-15	11	20	33.6	8.77	1.2e-15	15	23	43.6	7.64	1.5e-13	12	14	34.5	6.97	2.6e-12	14	18	40.4	7.57	2.1e-13	11	17	34.2	8.33	8.2e-15	13	21	43.3	7.46	3.3e-13	13	22	40.6	7.79	8e-14	13	21
[915]		WP_011089189.1	16	17	61.6	7.18	1.1e-12	13	15	43.1	7.66	1.4e-13	11	12	37.7	6.11	1e-10	7	8	27.4	5.41	3.4e-10	11	12	45.2	7.21	9.5e-13	15	17	54.4	8.48	4.3e-15	15	18	57.3	8.45	4.8e-15	15	17	63.7	8.45	4.8e-15	14	16	59.4	7.77	9e-14	12	13
[916]		WP_011085727.1	12	14	41.2	7.04	1.9e-12	12	13	40.5	6.29	4.9e-11	16	19	49.6	7.72	1.1e-13	13	14	42.4	8.49	4e-15	15	16	43.1	7.75	9.6e-14	13	15	37.8	9.59	3.7e-17	13	15	43.1	6	1.7e-10	12	14	45.4	6.49	2.1e-11	12	14	45.4	5.97	1.9e-10	12	13
[917]		WP_011086064.1	13	16	33	12.52	1.4e-22	10	13	27.3	7.99	3.4e-14	12	16	30.2	12.88	3e-23	13	17	37.6	9.31	1.3e-16	14	18	36.2	9.17	2.3e-16	14	17	36.2	10.75	2.6e-19	13	15	36.2	10.92	1.3e-19	13	15	35.5	11.59	7.3e-21	13	15	30.7	10.01	6.4e-18	12	13
[918]		WP_028171255.1	16	16	14.8	6.78	3.9e-12	15	15	14.8	7.67	1.3e-13	16	16	15.2	7.94	4.3e-14	17	17	16.7	6.53	1.8e-11	11	11	8.4	3.2	6.7e-08	18	18	16.3	5.26	3.2e-10	17	17	16.7	6.19	7.4e-11	16	16	14.6	6.1	1.1e-10	16	16	17.6	7.82	7e-14	16	16
[919]		WP_011083258.1	18	20	34.6	6.63	1.2e-11	17	17	35.1	8.61	2.5e-15	18	18	28.9	5.87	2.9e-10	14	14	30	6.38	1.6e-11	12	12	20.8	5.41	1.3e-10	15	15	33.8	8.52	3.6e-15	15	15	26.8	6.35	4.4e-12	16	16	30	6.62	1.2e-11	16	18	30.5	7.75	9.5e-14	12	13
[920]		WP_011087872.1	9	9	12.9	7.08	1.6e-12	12	12	16.9	6.23	6.2e-11	11	11	20.3	8.69	1.8e-15	17	18	22.4	9.11	2.9e-16	8	8	11.8	5.02	7e-11	16	16	22.2	8.82	1e-15	17	17	23.3	8.47	4.4e-15	15	15	17.6	9.65	2.9e-17	13	14	19.6	8.94	5.9e-16	16	16
[921]		WP_011087913.1	12	20	73.2	8.78	1.2e-15	8	11	57.1	7.66	1.4e-13	9	9	59.8	6.51	1.9e-11	8	9	57.1	6	8.8e-12	11	16	70.5	8.02	3e-14	12	18	65.2	9.91	9.5e-18	11	14	67.9	9.26	1.5e-16	12	16	65.2	9.92	9.2e-18	8	10	51.8	8.32	8.4e-15	7	8
[922]		WP_011085835.1	14	16	38.5	13.31	4.8e-24	8	8	23	9.25	1.6e-16	10	11	35.8	11.08	6.7e-20	9	9	22.1	10.21	2.7e-18	2	2	7	1.45	1.1e-05	3	3	8.5	2.36	8e-07	2	2	6.1	2.35	6e-07	4	4	16.1	8.06	2.6e-14	9	10	27.3	10	6.5e-18	9	9
[923]		WP_011086735.1	15	17	28.7	11.81	2.9e-21	16	17	26.2	6.38	3.2e-11	16	17	26	6.53	1.8e-11	17	19	29.5	8.01	3.2e-14	14	15	25.2	7.28	7e-13	18	19	32.7	6.6	1.3e-11	16	18	29	11.51	1e-20	14	15	20.1	6.86	4.1e-12	12	14	20.6	5.87	3e-10	15	17
[924]		WP_011083782.1	16	17	46.7	6.51	1.9e-11	12	12	34	6.66	1e-11	16	16	43.8	6.84	4.7e-12	15	15	48.1	7.03	2.1e-12	9	9	20.9	4.81	2.6e-08	14	15	47.8	7.93	4.5e-14	13	13	35.1	7.99	3.5e-14	15	15	40.2	7.25	8e-13	14	14	35.1	7.67	1.3e-13	11	11
[925]		WP_011089174.1	11	12	29.9	7.2	1e-12	12	13	35	7.98	3.6e-14	12	14	33.8	7.04	2e-12	13	13	38.6	6.26	5.4e-11	9	10	28.4	3.45	6.3e-08	10	11	30.8	6.4	3e-11	12	13	35	7.22	9.2e-13	11	12	33.2	6.36	3.6e-11	11	11	31.7	7.35	5.4e-13	14	15
[926]		WP_011090845.1	10	14	43.3	8.39	6.3e-15	10	14	39.8	8.31	8.9e-15	13	18	51.9	9.42	7.6e-17	9	10	39.8	8.5	4e-15	9	10	36.6	8.81	1.1e-15	7	9	33.8	8.17	1.6e-14	10	14	34.4	8.62	2.4e-15	10	13	43.6	9.64	3.1e-17	10	14	41.1	9.42	7.6e-17	7	9
[927]		WP_028171744.1	8	11	32.5	8.71	1.6e-15	9	11	32.5	6.96	2.8e-12	8	11	32.5	10.52	7.2e-19	12	18	34.2	8.91	6.8e-16	13	19	44.6	9.2	2e-16	12	20	44.6	10.9	1.4e-19	9	15	32.5	11.41	1.6e-20	12	17	44.6	9.78	1.7e-17	9	17	42.9	10.94	1.2e-19	11	20
[928]		WP_011083559.1	13	14	32.5	7.52	2.6e-13	16	17	45.8	7	2.4e-12	15	18	37	7.16	1.2e-12	11	12	30	6.82	5e-12	10	10	27.8	6.15	8.6e-11	16	18	41.8	7.01	2.2e-12	14	16	38	8.09	2.2e-14	15	20	38	7.14	1.3e-12	11	13	32	8.89	7.5e-16	16	19
[929]		WP_011087522.1	13	18	46.8	10.69	3.4e-19	7	7	25.4	7.36	5.1e-13	10	13	34.8	7.98	3.6e-14	10	10	31	8.14	1.8e-14	8	9	31	7.89	5.2e-14	10	11	30.4	8.03	2.9e-14	10	12	32.5	10.56	5.9e-19	13	16	46.8	10.75	2.7e-19	10	12	36.3	7.5	2.8e-13	10	10
[930]		WP_011083579.1	12	14	23.7	6.71	7.9e-12	12	15	23.9	8.95	5.7e-16	13	16	23.7	6.57	1.5e-11	13	15	29.2	8.96	5.5e-16	14	15	30.3	7.85	6.4e-14	11	14	26.1	8.73	1.5e-15	14	17	30.5	8.75	1.3e-15	13	17	27.8	7.96	3.8e-14	12	17	28.8	7.76	9.4e-14	17	21
[931]		WP_038965859.1	12	14	36.3	8.53	3.5e-15	10	13	29.5	7.68	1.3e-13	12	15	30.7	8.18	1.5e-14	13	14	35.8	7.61	1.7e-13	7	9	27.2	7.19	1e-12	11	13	28	7.41	4e-13	11	14	34.8	7.73	1e-13	11	14	34.8	7.53	2.5e-13	11	15	36.8	8.14	1.8e-14	12	16
[932]		WP_011089807.1	9	12	28.2	7.51	2.7e-13	16	19	33.5	7.84	6.5e-14	12	16	35	7.4	4.2e-13	17	20	42.4	8.02	3e-14	11	11	34.1	7.54	2.3e-13	14	14	37.3	6.92	3.4e-12	13	15	39	7.54	2.3e-13	13	15	37	7.41	4e-13	17	19	39.7	6.8	5.4e-12	18	20
[933]		WP_038967117.1	17	18	31.3	6.66	1e-11	17	19	34.4	6.77	6.2e-12	17	17	34.9	7.65	1.5e-13	12	14	22	6.43	1.5e-11	14	14	29.9	6.55	1.6e-11	14	15	28.1	6.36	3.6e-11	15	15	30.2	6.8	5.4e-12	16	17	29.9	6.65	1.1e-11	16	17	34.4	6.51	1.9e-11	18	19
[934]		WP_038966876.1	15	22	46.5	9.83	1.4e-17	13	19	46.5	9.43	7.5e-17	15	23	47.7	6.47	2.2e-11	12	15	46.5	8.38	6.5e-15	10	12	31.3	5.01	1.2e-08	14	18	54.7	9.42	7.6e-17	11	16	42.8	6.94	3e-12	13	18	38.3	8.17	1.6e-14	14	22	46.5	9.34	1.1e-16	12	17
[935]		WP_011087823.1	13	15	37	13.67	1.1e-24	9	9	27.6	8.61	2.5e-15	10	12	33.9	12.89	2.9e-23	10	10	39.4	7.71	1.1e-13	8	8	40.2	6.73	7.5e-12	14	15	39.8	11.52	9.8e-21	9	9	26.4	8.94	6e-16	9	11	29.5	12.53	1.3e-22	12	13	37.4	12.36	2.8e-22	12	14
[936]		WP_011087857.1	13	13	25.4	8.66	2e-15	12	14	25.8	10.15	3.4e-18	14	15	26.5	10.82	2e-19	11	12	21.8	6.26	5.5e-11	9	10	15.7	4.11	9.3e-09	11	12	30.3	10.16	3.3e-18	13	14	31.3	7.22	9.3e-13	10	11	23.4	6.67	9.4e-12	13	14	23.8	7.8	7.8e-14	13	14
[937]		WP_038967151.1	13	16	17.9	6.43	2.7e-11	16	22	23.7	7.55	2.2e-13	20	23	29.1	8.03	2.9e-14	15	15	22.1	8.04	2.8e-14	18	19	26.3	6.32	4.3e-11	15	17	20.4	7.89	5.3e-14	18	20	27.5	5.93	2.3e-10	15	20	23.8	7.51	2.6e-13	15	17	21.7	6.21	6.8e-11	14	16
[937-1]	14	WP_038967152.1	9	10	12.1	4.9	5.9e-10	11	13	16.9	6.28	2.5e-12	8	8	12.3	6.29	5.3e-12	6	7	8.6	5.3	7e-11	6	6	8.3	2.01	1.5e-06	7	8	9.8	4.22	7.8e-10	7	7	10.1	4.75	2.6e-09	5	5	7.5	3.28	1.6e-07	13	13	18.9	6.3	2.3e-12	8	8
[937-2]	12	WP_038967150.1	4	4	8.3	4.81	3.1e-10	6	7	11.5	7.77	8.9e-14	6	6	10.2	6.5	2e-11	6	7	12.3	3.9	9.5e-09	1	1	1.5	-0.36	0.00067	2	2	3.8	3.6	1.6e-08	2	2	3.6	5.44	7.3e-10	2	3	3.6	3.99	7.3e-09	7	7	13	7.5	2.8e-13	7	8
[938]		WP_038965893.1	13	16	37.1	9.09	3.1e-16	10	13	29.3	7.6	1.8e-13	14	17	44.3	9.02	4.3e-16	12	14	34.5	5.02	2.5e-10	12	12	48.2	8.06	2.6e-14	13	14	37.1	6.97	2.7e-12	11	13	35.2	7.22	9.1e-13	12	15	34.2	7.92	4.6e-14	14	19	41.7	8.98	5.2e-16	12	13
[939]		WP_011086942.1	11	12	21.2	8.69	1.7e-15	9	12	17.4	9.56	4.3e-17	11	14	25.9	8.64	2.1e-15	8	12	17.2	9.65	2.9e-17	13	16	42.4	8.57	2.9e-15	11	15	22.1	9.59	3.8e-17	10	12	20.3	9.31	1.2e-16	12	17	25.9	8.92	6.6e-16	13	17	29.7	9.25	1.6e-16	11	15
[940]		WP_063921626.1	16	16	22	6.45	2.5e-11	13	13	18.8	6.37	3.4e-11	12	12	14.3	7.91	4.9e-14	16	16	21.8	9.51	5.4e-17	10	10	13.9	5.41	7.9e-10	12	12	17.2	6	1.6e-10	12	12	18.3	6.08	4e-11	12	12	16.4	6.97	2.6e-12	13	13	20.2	6.62	1.2e-11	16	16
[941]		WP_011087502.1	13	17	29.5	8.04	2.7e-14	12	15	23.6	6.44	2.5e-11	12	14	24.2	7.07	1.7e-12	11	14	20.9	7.75	9.5e-14	15	16	33.6	7.66	1.4e-13	13	16	26.3	7.3	6.6e-13	12	13	31.6	7.01	2.2e-12	14	16	31.3	7.83	6.8e-14	10	16	23.6	7.65	1.5e-13	12	15
[942]		WP_011085010.1	14	14	36.1	6.28	5.1e-11	14	14	33.5	7.23	8.8e-13	14	14	35.4	5.97	1.9e-10	14	15	32.3	7.24	8.5e-13	13	13	29.2	6.73	7.5e-12	15	16	33	6.76	6.6e-12	14	15	32.5	8.8	1.1e-15	15	16	32.1	6.95	2.9e-12	14	14	34.4	7.44	3.6e-13	12	13
[943]		WP_038967383.1	9	10	13.8	7.04	2e-12	12	12	16	6.37	3.4e-11	16	16	23.4	7.65	1.5e-13	15	16	23.7	7.95	4e-14	13	13	19.2	6.25	3.4e-11	18	19	29	7.85	6.4e-14	11	11	17	6.27	5.2e-11	13	13	18.9	7.25	8.1e-13	11	11	17.9	7.59	1.9e-13	9	10
[944]		WP_011090843.1	14	16	35.5	7.61	1.7e-13	11	14	31.7	7.46	3.3e-13	16	16	42.4	7.03	2e-12	9	10	25.9	7.56	2.1e-13	7	8	22.1	6.38	3.3e-11	11	12	32.3	7.67	1.3e-13	15	16	40.5	7.43	3.7e-13	13	16	39.2	7.22	9.2e-13	12	16	36.3	9.25	1.6e-16	10	10
[945]		WP_011088343.1	13	14	37.8	6.76	6.5e-12	10	11	36.4	7.01	2.2e-12	15	17	46.3	7.18	1.1e-12	11	12	33.5	7.06	1.8e-12	13	14	35.6	7.63	1.6e-13	14	15	44.7	8.98	5.1e-16	15	16	53.5	7.53	2.5e-13	12	13	34	7.39	4.4e-13	12	13	37.5	6.91	3.5e-12	12	14
[946]		WP_011086682.1	11	17	53.7	10.15	3.4e-18	10	15	44.1	8.76	1.3e-15	10	15	40.2	8.53	3.5e-15	9	12	32.3	8.04	2.8e-14	9	15	36.7	7.71	1.1e-13	14	20	53.7	9.99	6.8e-18	11	16	48.9	8.64	2.1e-15	12	17	45.9	9.75	1.9e-17	10	15	44.5	9.62	3.3e-17	14	19
[947]		WP_028174970.1	14	19	41.7	9.92	9.4e-18	9	10	32.6	8.7	1.7e-15	9	10	35.5	8.78	1.2e-15	9	9	32.6	7.77	8.7e-14	8	9	29.6	8.52	3.6e-15	9	10	34.9	8.55	3.1e-15	9	10	32.6	8.44	5e-15	10	11	32.6	7.35	5.3e-13	9	10	32.6	8.4	5.9e-15	8	9
[948]		WP_011083715.1	14	14	67.4	8.4	6e-15	9	9	38.4	6.17	8e-11	8	8	32.6	6.62	1.2e-11	13	13	44.1	6.35	3.7e-11	13	13	47.3	6.14	9.1e-11	16	16	53.8	6.4	3.1e-11	13	13	58.4	6.18	7.8e-11	11	11	43.7	6.68	9.4e-12	8	8	47.7	7.72	1.1e-13	8	8
[949]		WP_011085105.1	10	10	15.2	9.63	3.2e-17	12	13	16.9	8.09	2.2e-14	10	11	15.5	7.37	4.9e-13	12	13	15.7	7.32	5.9e-13	10	11	15.2	8.51	3.7e-15	11	12	14	7.58	2e-13	15	15	18.2	7.72	1.1e-13	14	15	21.5	8.19	1.4e-14	15	16	19.5	7.84	6.4e-14	11	12
[950]		WP_011090601.1	12	12	13.2	6.36	3.6e-11	19	20	23.7	6.78	6e-12	12	12	13.6	6.27	5.3e-11	13	13	16	7.01	2.3e-12	12	12	13.3	5.93	4.6e-12	15	15	17.9	5.87	5.5e-11	13	13	16	5.82	9.3e-11	13	13	15.1	6.82	5.1e-12	14	14	15	6.19	7.5e-11	15	15
[951]		WP_011087521.1	14	18	46.2	10.86	1.7e-19	11	13	43.7	6.96	2.7e-12	12	15	39.1	5.33	1.2e-09	13	14	43.7	8.66	2e-15	9	9	28.7	3.02	2.8e-07	12	16	46.2	5.26	6.7e-10	13	15	42.3	10.17	3.2e-18	10	12	33.3	5.25	4.2e-09	12	15	40.9	8.58	2.8e-15	10	11
[952]		WP_011090113.1	11	17	79	9.01	4.4e-16	9	12	66.9	8.1	2.2e-14	9	11	69.4	10.76	2.5e-19	10	12	69.4	8.62	2.4e-15	8	9	54.1	7.46	3.3e-13	9	11	69.4	8.38	6.5e-15	9	15	74.5	9.31	1.2e-16	9	12	69.4	7.73	1.1e-13	15	20	88.5	9.51	5.4e-17	14	18
[953]		WP_011090115.1	10	12	34	10.43	1.1e-18	10	11	38.6	10.12	3.9e-18	9	9	38.3	9.72	2.2e-17	8	9	32.1	8.3	9.1e-15	9	11	37.4	9.92	9e-18	13	15	49.5	9.44	7e-17	10	11	43.9	8.46	4.7e-15	5	6	26.5	8.7	1.7e-15	9	11	43.9	9.6	3.5e-17	8	12
[954]		WP_011088717.1	13	19	63.1	7.97	3.8e-14	11	13	54.5	7.14	1.3e-12	10	11	49.1	8.29	9.5e-15	11	11	49.1	7.21	9.6e-13	11	13	49.1	7.99	3.5e-14	11	13	53.4	7.98	3.7e-14	12	14	54.5	7.77	8.9e-14	12	14	60.2	7.41	4e-13	11	14	60.2	7.29	6.9e-13	9	11
[955]		WP_011088751.1	13	13	19.6	5.79	7.1e-11	17	17	29.2	7.94	4.2e-14	17	17	30.1	7.71	1.2e-13	15	16	24.8	5.83	6.3e-11	12	12	22.2	4.76	1.2e-09	16	16	28.6	6.08	1.2e-10	14	14	24.7	8.05	2.7e-14	13	13	20.8	5.8	1e-10	12	12	21.4	6.65	6.6e-12	15	15
[956]		WP_038966534.1	14	14	41.8	5.8	5.1e-11	15	17	42.1	7.32	5.9e-13	14	14	45.1	9.35	1e-16	14	15	36.5	5.79	2.9e-10	14	14	42.3	7.08	1.7e-12	15	16	40.6	7.99	3.5e-14	16	17	46.1	8.41	5.7e-15	14	14	37.5	9.86	1.2e-17	15	17	43.6	8.72	1.5e-15	14	14
[957]		WP_011083665.1	9	10	31.6	9.03	4.2e-16	10	11	25.9	7.78	8.3e-14	15	19	39	8.46	4.7e-15	13	16	35.2	8.19	1.5e-14	9	9	30.6	5.88	4.9e-11	9	10	31.4	8.64	2.2e-15	11	13	37.8	7.51	2.7e-13	8	9	24.9	6.96	2.8e-12	13	16	37.5	9.14	2.5e-16	13	15
[958]		WP_011089821.1	12	14	54.7	7.46	3.4e-13	10	10	58.1	7.22	9.1e-13	11	11	54.7	7.25	8e-13	10	10	48.3	7.3	6.4e-13	8	9	36.4	7.07	1.8e-12	10	11	48.3	6.36	3.7e-11	10	11	46.6	7.95	4.1e-14	11	11	65.3	9.24	1.7e-16	12	14	64.4	10.02	6.1e-18	9	9
[959]		WP_038966787.1	12	12	23.8	7.61	1.8e-13	16	16	29.6	7.39	4.4e-13	14	14	25	7.33	5.7e-13	15	15	26.2	7.2	1e-12	11	11	20.6	7.55	2.3e-13	14	14	23.6	7.14	1.3e-12	11	11	19.8	7.97	3.8e-14	13	13	23.2	7.79	7.9e-14	15	16	25.6	8.3	9.2e-15	15	15
[960]		WP_011086023.1	8	10	28.3	8.5	3.9e-15	8	12	21.2	8.13	1.9e-14	10	13	31	8.49	4.1e-15	15	17	29.6	7.8	7.7e-14	10	12	29.1	7.51	2.7e-13	11	14	26.6	8.1	2.2e-14	11	14	27.2	8.39	6.2e-15	11	14	32.1	8.7	1.6e-15	11	14	26.1	8.46	4.6e-15	12	15
[961]		WP_038967973.1	15	19	50.9	8.44	5e-15	4	5	13.3	4.45	1.2e-08	6	7	15.1	6.08	2.5e-11	7	8	26.6	5.55	5.2e-10	6	6	18.8	2.7	1.4e-07	7	8	21.1	3.51	1.4e-07	8	10	28	5.81	2e-10	7	8	27.1	5.85	5.5e-11	10	13	39.9	6.09	1.1e-10	8	10
[962]		WP_236842198.1	17	18	44	8.28	1e-14	14	17	38.8	7.99	3.5e-14	16	18	48.5	7.94	4.2e-14	16	17	43.8	7.98	3.6e-14	12	13	32.5	6.04	1.4e-10	15	15	40.2	7.76	9.2e-14	11	14	32.5	7.72	1.1e-13	14	15	39.5	7.72	1.1e-13	14	15	43.8	8	3.2e-14	17	18
[963]		WP_038967130.1	11	14	56.6	8.62	2.3e-15	11	12	44.7	9.53	4.8e-17	13	16	47.9	10.69	3.4e-19	10	11	47.9	10.52	7e-19	8	9	44.7	10.29	1.9e-18	14	19	48.4	12.31	3.5e-22	13	17	62.6	8.95	5.8e-16	12	16	47.9	9.02	4.4e-16	9	13	43.8	9.81	1.5e-17	10	12
[964]		WP_011089579.1	13	15	41.7	8.89	7.4e-16	11	13	35.8	8.62	2.4e-15	10	13	33.9	7.25	8e-13	9	11	29.1	7.78	8.6e-14	1	1	4.3	3.91	1.4e-09	1	1	3.1	2.09	9.9e-08	5	5	18.5	8.4	5.3e-16	4	5	15.4	7.15	1.2e-13	12	15	38.6	8.52	3.6e-15	12	13
[965]		WP_038965215.1	12	16	19.4	6.26	5.5e-11	15	18	29.6	9.49	5.6e-17	14	19	19.4	7.43	3.8e-13	14	17	32.8	8.95	5.8e-16	5	5	10.4	5.33	3.9e-10	5	6	10.4	5.51	1.3e-09	9	10	14.8	6.89	3.1e-12	7	8	12.4	5.83	3.5e-10	14	17	25	8.34	7.7e-15	14	18
[966]		WP_011088242.1	11	12	26.5	7.98	3.6e-14	6	7	18.3	7.53	2.4e-13	11	12	25.8	7.97	3.8e-14	10	10	29.4	7.91	4.7e-14	11	12	28.4	7.35	2.1e-13	13	15	35.4	10.48	8.6e-19	12	14	29.4	8.9	7.1e-16	13	15	34	9.53	4.9e-17	8	8	19.8	7.87	5.7e-14	10	11
[967]		WP_161532582.1	14	18	43.1	9.13	2.7e-16	10	13	35.1	7.7	1.2e-13	11	13	36.3	7.98	3.6e-14	11	14	35.1	8.17	1.6e-14	11	14	34.4	8.49	4e-15	11	13	35.1	8.77	1.3e-15	12	16	35.1	8.94	5.9e-16	14	18	37.8	8.72	1.6e-15	12	15	34.7	8.39	6.3e-15	12	14
[968]		WP_011087749.1	12	13	44.6	13.57	1.6e-24	8	8	34.7	13.82	5.5e-25	7	8	24.8	7.11	1.4e-12	8	8	28.5	8.28	1e-14	6	6	26.9	7.57	2.1e-13	8	8	32.8	12.47	1.7e-22	6	6	19.8	8.64	2.1e-15	7	7	27.2	8.18	1.6e-14	11	11	45.5	14.13	1.5e-25	9	10
[969]		WP_038968057.1	10	12	50.7	8.38	6.4e-15	8	10	42.3	8.54	3.3e-15	12	12	56.8	8.25	1.2e-14	8	9	39.1	10.45	9.6e-19	9	9	42	7.98	3.6e-14	10	11	49	10.6	5e-19	9	10	45.5	8.56	3.1e-15	9	10	41.4	8.15	1.8e-14	10	14	50.7	8.33	8.1e-15	14	15
[970]		WP_028174950.1	17	18	79.6	6.98	2.6e-12	13	13	77.4	6.3	4.6e-11	12	13	64.2	6.24	5.9e-11	12	12	65.7	6.71	8.1e-12	11	11	59.1	5.29	3.5e-09	15	16	78.1	6.95	2.9e-12	16	16	80.3	8.17	1.6e-14	14	14	74.5	6.2	7.1e-11	13	14	75.2	8.07	2.5e-14	11	12
[971]		WP_051000347.1	11	12	39.4	8.62	2.3e-15	15	16	53.3	8.21	1.3e-14	11	14	37.4	7.8	7.7e-14	10	12	33.7	7.56	2.2e-13	8	9	26.8	5.7	2e-10	12	14	48.8	8.41	5.8e-15	12	14	51.2	6.53	1.7e-11	10	11	40.7	5.65	7.5e-10	12	14	41.5	8.59	2.6e-15	13	14
[972]		WP_011085547.1	13	17	55.3	9.28	1.4e-16	8	10	53.9	7.76	9.3e-14	10	11	56	8.33	7.9e-15	7	8	53.2	7.1	1.5e-12	10	11	53.2	8.9	7.1e-16	10	11	53.9	7.49	2.9e-13	9	10	45.4	8.7	1.7e-15	10	11	53.9	9.14	2.6e-16	7	8	41.1	8.79	1.2e-15	7	8
[973]		WP_011083339.1	14	14	47	8.04	2.8e-14	10	10	33.2	6.52	1.8e-11	12	12	47.4	6.61	1.2e-11	9	9	38.3	5.8	1.9e-11	8	8	35.2	3.99	3.2e-09	13	13	45.1	7.1	6.9e-13	12	12	45.1	5.66	3e-10	13	14	45.5	4.68	3.3e-09	13	13	44.7	5.98	1.8e-10	12	12
[974]		WP_011084333.1	14	19	75.3	7.98	3.6e-14	9	12	36.9	6.38	3.3e-11	13	17	75.3	8.29	9.7e-15	14	16	55.5	6.25	5.8e-11	12	14	63.9	9.25	1.6e-16	14	16	44.9	7.9	5e-14	10	14	49.8	6.93	3.2e-12	10	14	50.6	8.02	3e-14	11	15	55.9	8.63	2.3e-15	13	20
[975]		WP_038967518.1	11	12	28.9	8.3	9.1e-15	14	15	37.1	7.9	5e-14	12	13	28.2	8.29	9.5e-15	15	17	39.3	7.68	1.3e-13	9	10	18.2	8.11	2.1e-14	10	11	21.7	7.63	1.6e-13	12	13	26.5	8.23	1.3e-14	9	10	20	9.13	2.7e-16	12	13	29.9	8.21	1.3e-14	10	11
[976]		WP_011086799.1	10	10	26.2	7	2.3e-12	14	15	25.6	6.91	1.8e-12	12	13	25.1	6.37	2.3e-11	14	14	31.4	8.37	6.8e-15	12	12	24.5	6.21	2.1e-11	14	14	23.8	7.89	5.3e-14	12	12	24.9	7.85	6.1e-14	9	9	22.7	7.62	1.6e-13	14	15	32.7	7.75	9.7e-14	15	17
[977]		WP_011089478.1	12	12	25.3	7.44	3.6e-13	12	14	28.1	6.6	1.3e-11	16	18	46.9	8.59	2.6e-15	10	10	29.6	7.65	1.5e-13	5	5	17	5.71	2.7e-11	5	5	17.3	7.28	7.1e-13	3	3	9.5	7.03	2e-12	7	7	25.6	6.81	5.2e-12	13	16	29.3	7.03	2e-12	18	21
[978]		WP_038965649.1	15	17	50.4	8.41	5.7e-15	11	14	44.6	8.42	5.6e-15	13	15	49.6	8.09	2.3e-14	6	7	23.2	6.46	2.3e-11	11	11	41.7	8.71	1.6e-15	10	13	38.8	7.53	2.4e-13	14	17	51.9	8.11	2.1e-14	12	14	42.3	8.33	7.9e-15	11	13	32.2	8.11	2e-14	10	12
[979]		WP_011087726.1	13	36	62.3	9.39	9e-17	13	28	62.3	8.37	6.8e-15	12	24	63	9.66	2.8e-17	13	27	62.3	9.74	1.9e-17	12	21	61.7	9.6	3.6e-17	13	28	59.1	9.34	1.1e-16	13	30	62.3	8.13	1.9e-14	14	25	63	8.82	1e-15	12	27	61	9.55	4.4e-17	13	26
[980]		WP_007598398.1	13	16	72.6	8.53	3.5e-15	8	9	66	6.84	4.6e-12	7	8	53.8	7.36	5e-13	9	10	69.8	7.26	7.6e-13	6	7	49.1	6.51	1.9e-11	8	9	71.7	7.42	3.9e-13	6	7	49.1	6.87	4e-12	8	9	72.6	7.08	1.7e-12	9	10	66	8.03	2.9e-14	8	10
[981]		WP_011085601.1	12	16	40.1	7.63	1.6e-13	11	12	34.5	7.26	7.9e-13	12	14	38.5	7.39	4.5e-13	13	14	33.9	8.08	2.4e-14	8	8	29.2	5.2	3.1e-10	11	11	32.9	7.87	5.8e-14	12	13	37.9	6.96	2.8e-12	9	10	26.1	6.88	3.8e-12	13	15	41.9	8.23	1.2e-14	12	17
[982]		WP_038966658.1	10	13	32.9	6.9	3.7e-12	7	10	26.4	7.18	1.1e-12	10	13	39	9.65	2.9e-17	10	13	40	6.78	5.9e-12	6	7	26.4	5.86	3.1e-10	10	13	48.5	8.91	6.8e-16	7	10	31.2	7.1	1.5e-12	8	10	24.1	6.58	1.4e-11	9	13	31.5	8.71	1.6e-15	12	15
[983]		WP_011086596.1	14	14	19.8	6.82	5e-12	13	14	16.1	5.69	2.2e-10	16	16	24.1	8.82	1e-15	16	16	20.6	6.5	1.9e-11	6	6	6	3.44	1.2e-07	14	14	19.3	6.59	8e-12	10	10	14	4.23	7.4e-09	11	11	16.7	6.8	5.6e-12	12	12	19.3	5.25	1.6e-09	15	15
[984]		WP_038966168.1	15	20	38.2	7.83	6.9e-14	12	16	37	7.45	3.4e-13	13	19	46.6	8.12	2e-14	10	12	30.7	7.67	1.4e-13	10	12	41.2	7.56	2.1e-13	11	14	30.4	7.87	5.7e-14	12	16	35.8	8.4	6e-15	14	18	46.6	8.44	5.1e-15	14	20	39.4	8.94	5.9e-16	13	17
[985]		WP_011087797.1	5	7	25.6	5.4	2.2e-09	4	4	18	5.72	5.6e-10	8	10	45.9	6.36	3.7e-11	12	14	69.2	7.33	5.8e-13											5	5	26.2	6.06	1.3e-10	7	9	50	7.47	3.2e-13	5	5	31.4	4.21	2.9e-08	4	4
[986]		WP_011084004.1	12	22	59	10.41	1.1e-18	7	10	46	7.02	2.1e-12	9	13	57.1	7.61	1.8e-13	8	11	53.4	6.4	3.1e-11	6	10	47.8	10.5	7.6e-19	10	15	54.7	10.37	1.3e-18	14	20	62.7	10.28	2e-18	14	21	62.7	10.67	3.8e-19	9	15	50.3	11.23	3.4e-20	7	8
[987]		WP_011087136.1	13	15	52.7	9.57	4e-17	9	10	34.7	6.89	3.8e-12	12	14	59.8	8.98	5.1e-16	14	14	58.2	6.7	8.5e-12	9	10	42.7	4.19	7.3e-10	13	14	53.6	7.18	3.6e-13	12	13	46.9	6.95	1.8e-12	10	11	40.2	6.98	2.6e-12	13	14	70.7	9.27	1.5e-16	11	13
[988]		WP_011090847.1	15	15	62.1	7.46	3.2e-13	6	6	34.3	6.72	1e-12	10	10	52.7	7.13	6.7e-13	9	9	43.2	8.9	7.3e-16	8	8	36.7	6.81	4e-12	9	9	47.9	7.58	2e-13	9	9	49.7	7.21	9.6e-13	11	11	61.5	7.72	9.3e-14	7	7	32.5	7.35	5.2e-13	6	6
[989]		WP_011087643.1	11	12	24.6	9.03	4.1e-16	10	11	22.1	7.93	4.4e-14	12	12	29.1	8.34	7.8e-15	11	12	25.4	6.86	4.3e-12	10	12	24.9	6.82	5e-12	16	20	34	8.92	6.6e-16	12	15	40.1	10.33	1.6e-18	13	15	31.9	8.68	1.8e-15	14	15	33.8	8.44	5e-15	12	14
[990]		WP_011085302.1	15	15	31.4	8.12	2e-14	15	15	28.6	9.46	6.4e-17	14	14	28.8	8.51	3.7e-15	12	12	23.8	7.64	1.5e-13	12	12	28.3	6.73	7.3e-12	13	13	27.1	8.03	2.9e-14	13	13	27.7	7.35	5.3e-13	11	11	22.1	4.88	1e-08	13	13	25.5	7.78	8.6e-14	11	11
[991]		WP_011084485.1	9	10	25.4	7.7	1.2e-13	12	13	32	8.92	6.6e-16	7	8	17.6	6.06	1.3e-10	10	11	26.2	9.07	3.4e-16	10	11	25.2	6.55	1.6e-11	11	12	32.5	9.76	1.8e-17	13	15	34.1	9.12	2.8e-16	9	12	24.9	5.64	7.8e-10	10	11	27.2	6.57	1.4e-11	10	11
[992]		WP_011089318.1	14	14	48.2	6.43	2.7e-11	14	15	47.6	6.8	5.4e-12	11	12	37.1	6.17	8.1e-11	12	13	35.2	6.58	1.4e-11	16	16	43.3	6.14	9.3e-11	15	16	43	7.5	2.8e-13	12	14	44	8.04	2.8e-14	11	13	35.8	7.73	1e-13	14	16	42.3	8.19	1.5e-14	13	14
[993]		WP_011085220.1	14	16	42.3	9.08	3.3e-16	13	14	42.3	5.57	1e-09	14	14	41.3	8.09	2.3e-14	14	16	50.9	11.21	3.7e-20	15	16	45.9	6.44	2.6e-11	17	19	52	7.62	1.6e-13	13	15	41.6	7.66	1.4e-13	15	18	53.4	10.02	5.9e-18	12	14	43.8	7.61	1.7e-13	15	17
[994]		WP_008549964.1	13	26	41.1	8.43	5.3e-15	7	10	33.3	7.64	1.5e-13	12	21	36	8.4	6e-15	9	12	39.9	8.4	6e-15	9	11	43.4	6.8	5.6e-12	11	18	49.2	7.9	5e-14	12	19	41.1	8.2	1.4e-14	10	16	39.9	8.03	2.9e-14	12	19	41.1	7.74	9.9e-14	11	14
[995]		WP_028175030.1	13	14	40	6.74	7e-12	14	14	49.5	6.48	2.1e-11	14	14	46.4	6.6	1.3e-11	10	10	33.2	5.33	1.9e-11	10	10	36.3	6.21	6.8e-11	16	18	51.5	6.73	1.3e-12	11	12	40.7	5.33	7.5e-10	14	15	50.5	7.9	4.9e-14	16	17	55.6	7.55	2.2e-13	11	11
[996]		WP_028175380.1	9	16	42.8	9.56	4.2e-17	9	14	27	8.86	8.6e-16	10	16	27	9.53	4.9e-17	5	10	25.9	8.84	9e-16	6	6	32.4	8.51	3.8e-15	10	15	42.8	9.96	7.9e-18	9	14	27	10.17	3.1e-18	11	14	38.5	9.42	7.6e-17	8	16	25.9	9.33	1.1e-16	6	11
[997]		WP_011088443.1	16	17	30.6	7.68	1.3e-13	11	12	26.3	8.58	2.8e-15	11	12	20.8	9.61	3.4e-17	9	10	15.7	8.03	2.9e-14	6	6	11.7	2.97	5.2e-08	7	7	13.2	5.51	2.8e-11	7	8	12.9	7.49	3e-13	5	6	8.2	6.63	4.8e-12	16	16	29.3	10.4	1.2e-18	14	16
[998]		WP_236842196.1	13	15	29.3	7.25	5.7e-13	14	16	34.5	10.49	8.2e-19	11	12	35	8.07	2.4e-14	11	12	31	8.47	4.4e-15	9	10	21.9	5.12	1.2e-10	13	15	31.5	8.46	4.7e-15	12	14	31.8	7.15	1.3e-12	15	18	34	8.73	1.5e-15	11	13	29.1	5.89	2.1e-10	8	11
[999]		WP_011090258.1	12	15	34.2	8.05	2.6e-14	12	17	28.4	7.29	6.7e-13	13	19	29.6	8.7	1.7e-15	13	17	33.3	8.57	2.9e-15	12	14	29.3	8.69	1.8e-15	13	15	39.9	8.69	1.8e-15	12	16	34.5	8.61	2.5e-15	12	14	35.6	8.59	2.7e-15	12	15	38.2	7.88	5.4e-14	12	16
[1000]		WP_011088744.1	10	15	42.2	8.95	5.6e-16	10	14	43	8.75	1.4e-15	14	19	48.2	8.77	1.2e-15	11	14	41.4	7.88	5.5e-14	11	12	48.2	8.39	6.3e-15	13	16	45.4	9.25	1.6e-16	10	14	41.4	8.17	1.6e-14	10	14	44.2	7.65	1.5e-13	9	12	34.9	10.78	2.4e-19	10	13
[1001]		WP_236842245.1	11	11	21	4.6	4.7e-09	17	17	22.7	5.87	2.9e-10	10	10	19.3	6.01	1.6e-10	14	14	23.6	6.88	3.9e-12	11	11	22.9	5.44	1.2e-11	14	14	27.5	6.82	5.7e-13	11	11	18.1	5.83	2.6e-10	11	11	19.1	7.01	2.2e-12	12	12	23.9	7.45	3.4e-13	11	11
[1002]		WP_011090622.1	13	13	29.8	7.22	9.3e-13	14	15	35.9	7	2.3e-12	16	18	42.3	8.5	4e-15	13	13	36.7	7.17	1.1e-12	6	6	22.1	4.11	1.6e-09	9	9	32	6.21	8.7e-12	10	10	26	5.11	8.8e-10	10	11	32.6	6.83	4.8e-12	15	16	37	8.12	2e-14	13	14
[1003]		WP_011083608.1	12	14	51.4	7.49	2.9e-13	13	17	51.4	8.31	8.7e-15	14	17	51.8	8.08	2.3e-14	12	12	36.7	6.08	1.2e-10	10	10	47.4	5.91	2.4e-10	15	16	60.6	7.16	1.2e-12	11	14	46.6	8.18	1.5e-14	15	18	60.6	7.61	1.8e-13	13	17	51.8	7.88	5.6e-14	13	14
[1004]		WP_011085063.1	16	19	54.4	7.84	6.6e-14	12	13	44	7.21	9.6e-13	11	13	47.2	7.24	8.4e-13	12	12	48.4	5.84	3.3e-10	13	13	45.6	5.82	3.5e-10	11	11	48.4	5.73	5.3e-10	11	12	45.6	7.39	4.4e-13	14	15	48.4	6.1	1.1e-10	12	14	45.6	6.19	7.3e-11	12	12
[1005]		WP_011089543.1	11	13	42.8	10.61	4.8e-19	10	12	44.1	8.37	6.9e-15	11	11	41.8	7.75	9.5e-14	11	13	30.2	6.67	9.8e-12	6	6	22	4.89	9.4e-11	8	8	25	7.48	3e-13	7	8	25.2	5.7	3.1e-10	5	6	20.5	8.88	7.6e-16	13	14	45	6.25	5.9e-11	13	14
[1006]		WP_011087735.1	7	7	12.5	8.39	6.4e-15	8	8	13.8	8.1	2.2e-14	11	11	22.1	8.19	1.5e-14	16	16	27	9.19	2e-16	2	2	4.1	2.93	3.6e-08	4	4	7.4	2.51	2e-08	5	5	6.6	5.69	1.7e-12	6	6	10	6.04	4.8e-11	10	10	17.2	9.2	2e-16	8	8
[1007]		WP_011083479.1	12	18	73.1	10.24	2.3e-18	10	16	62	7.72	1.1e-13	9	12	60.2	7.28	7.1e-13	8	12	51.9	6.36	3.7e-11	6	8	32.9	7.09	1.6e-12	10	14	60.2	7.39	4.4e-13	11	14	60.2	6.77	6.3e-12	13	19	62	7.1	1.5e-12	10	14	60.2	7.31	6.2e-13	7	10
[1008]		WP_011085318.1	13	13	45.1	9.57	4.1e-17	10	10	28.1	7.55	2.3e-13	11	11	37.9	9.02	4.3e-16	10	10	37.6	8.41	5.8e-15	6	6	14.3	4.97	1.3e-09	14	14	45.1	9.71	2.3e-17	13	14	37.9	9.09	3.1e-16	13	13	50.7	8.1	2.2e-14	12	13	40.9	8.77	1.3e-15	14	14
[1009]		WP_171463736.1	10	13	21.6	10.3	1.8e-18	8	8	17.9	10.48	8.3e-19	10	12	19.6	9.94	8.3e-18	12	13	25.7	9.19	2e-16	10	10	21.3	10.25	2.3e-18	9	10	16.8	10.33	1.6e-18	10	11	22.7	10.23	2.4e-18	11	13	19.8	10.36	1.4e-18	9	10	16.8	10.2	2.8e-18	9	9
[1010]		WP_011085533.1	15	15	41.4	7.61	1.7e-13	8	8	30.9	5.79	4.1e-10	9	9	29.3	5.99	1.7e-10	8	8	24.6	6.45	2.4e-11	7	7	24.6	3.85	1.2e-07	8	8	24.6	5.58	1e-09	7	7	24.6	5.96	2e-10	10	10	31.2	6.06	1.3e-10	9	9	31.2	5.51	1.4e-09	9	9
[1011]		WP_038966803.1	11	14	55.6	9.44	7.2e-17	9	10	39.7	10.07	4.9e-18	9	11	44.4	9.65	2.9e-17	10	12	45.6	7.15	1.2e-12	8	9	41.6	6.1	2.5e-12	11	13	49.1	6.99	2.5e-12	12	13	55.6	9.86	1.2e-17	8	12	33.1	4.61	3.5e-09	11	15	46.6	10.89	1.4e-19	11	13
[1012]		WP_011083199.1	8	9	17.4	7.66	4.9e-15	16	18	35.3	7.74	1e-13	16	18	31.6	7.88	5.5e-14	10	10	25	7.85	6.3e-14	5	6	11.9	4.49	8.1e-10	9	10	22.9	7.08	1.2e-12	7	7	15.6	6.33	1.8e-11	5	6	11.2	6.26	2.6e-11	13	14	30.1	7.3	6.7e-13	13	14
[1013]		WP_027560187.1	12	14	77.6	9.3	1.3e-16	6	7	51.6	9.06	3.5e-16	8	9	63.4	9.05	3.7e-16	8	9	59.6	9.52	5.1e-17	3	3	17.4	5.56	1.9e-10	8	10	67.1	9.09	3.2e-16	8	10	69.6	8.65	2.1e-15	8	9	65.8	9.45	6.8e-17	8	13	63.4	9.17	2.3e-16	6	7
[1014]		WP_011083277.1	13	13	22.4	7.96	3.9e-14	14	15	23.1	9.71	2.3e-17	16	17	25.8	7.9	5.1e-14	12	13	19.8	7.67	1.5e-14	12	12	19.6	7.31	5e-13	12	12	16.3	5.23	2.2e-10	14	14	25.1	7.16	1.2e-12	12	13	20.5	8.6	2.5e-15	15	15	25	8.84	9.3e-16	8	8
[1015]		WP_038965387.1	16	16	38.3	6.09	1.1e-10	10	10	27.1	5.92	2.3e-10	10	10	23.3	5.69	6.3e-10	10	10	27.1	7.23	8.9e-13	9	9	25.4	5.49	1.5e-09	11	11	29.2	5.35	2.7e-09	12	12	32.7	7	2.4e-12	11	11	23.9	6.96	7.7e-13	11	11	29.2	6.46	2.4e-11	10	10
[1016]		WP_038966174.1	9	9	21.1	6.7	8.4e-12	14	16	27.3	5.95	2.1e-10	10	10	19.2	6.94	3.1e-12	11	11	22.2	9.29	1.3e-16	11	12	22.6	5.17	1.4e-09	15	17	27.4	9.15	2.4e-16	14	14	27.6	9.42	7.9e-17	13	13	21.1	8.89	7.3e-16	11	11	19.9	9.23	1.7e-16	13	14
[1017]		WP_038965133.1	17	17	43.1	6.19	7.4e-11	14	14	38.7	6	1.3e-10	15	15	36.1	6.16	8.6e-11	13	13	35.1	6.21	2e-11	10	10	25.2	7.76	9.1e-14	9	9	24.3	5.57	7.1e-10	14	14	38.7	6.51	1.9e-11	10	10	31.3	6.31	2.4e-11	14	15	36.7	6.18	2.2e-11	12	12
[1018]		WP_011087160.1	11	13	35.7	10.4	1.2e-18	8	9	32.1	7.71	1.1e-13	13	13	53.8	9.17	2.3e-16	14	14	47	9.3	1.3e-16	10	11	32.4	7.21	1.1e-13	12	13	45.1	9.26	1.5e-16	9	10	33.5	9.71	2.3e-17	12	13	43.4	8.61	2.5e-15	14	15	49.5	8.03	2.9e-14	12	12
[1019]		WP_011086690.1	14	18	56.5	7.94	4.3e-14	11	13	41.1	7.2	9.8e-13	12	14	46	8.58	2.8e-15	11	14	44.4	7.48	3e-13	10	11	41.1	6.29	4.9e-11	12	14	46	8.37	6.8e-15	10	12	37.9	7.66	1.4e-13	10	13	46	7.74	1e-13	10	13	41.1	8.19	1.4e-14	10	13
[1020]		WP_011085926.1	11	15	41.3	8.66	2e-15	13	14	43.2	8.99	4.9e-16	15	18	42.5	7.75	9.7e-14	15	17	52.2	8.41	5.6e-15	12	13	33.5	7.82	9e-15	13	14	38.2	4.75	8.1e-10	11	14	31.7	9.27	1.5e-16	14	15	37.6	8.71	1.6e-15	11	14	40.1	8.38	6.4e-15	15	17
[1021]		WP_011083432.1	15	17	35	6.68	9.3e-12	11	13	32.3	7.67	1.4e-13	14	15	31	6.65	1e-11	11	12	33	5.76	1.5e-10	15	16	38.4	5.9	1.1e-10	15	17	40.6	6.06	1.3e-10	14	16	35	6.69	6.5e-12	14	15	31	7.07	1.8e-12	16	18	35	8.68	1.8e-15	14	16
[1022]		WP_011087691.1	13	16	30.5	7	2.3e-12	12	15	27.9	6.85	4.4e-12	12	14	25.7	7.14	1.3e-12	16	18	42.3	11.15	4.8e-20	12	13	27.4	6.96	2.8e-12	15	16	34.9	6.65	1.1e-11	15	17	46.4	7.9	5.1e-14	14	15	28.8	6.54	1.7e-11	15	16	39.7	10.99	9.4e-20	15	18
[1023]		WP_011088822.1	14	16	28.4	9.36	9.9e-17	10	10	25.2	8.83	9.5e-16	11	11	30.9	6.75	4.3e-12	10	10	28.1	7.18	1.1e-12	7	8	24.5	6.33	4.2e-11	14	15	33.5	8.4	6.1e-15	15	16	39.6	8.25	1.1e-14	13	13	36.7	8.58	2.8e-15	13	16	30.9	7.17	1.1e-12	13	13
[1024]		WP_011083019.1	15	16	35.6	6.93	3.2e-12	11	13	27.5	5.85	3.1e-10	17	20	40.3	8.45	4.8e-15	10	10	30.1	6.09	1.1e-10	12	12	29.8	3.93	3.7e-09	15	16	37.7	7.01	2.2e-12	14	15	32.5	5.05	9.6e-09	18	20	39.5	6.75	6.8e-12	14	15	34.8	6.42	2.7e-11	12	13
[1025]		WP_038967019.1	11	13	31.1	9.77	1.8e-17	13	14	33	8.08	2.4e-14	11	12	29.2	9.84	1.3e-17	11	12	29.2	8.17	1.6e-14	5	5	21.8	9.3	1.3e-16	11	11	30.4	8.22	1.3e-14	12	14	32.7	11.37	1.9e-20	11	11	30.8	8.88	7.7e-16	13	13	33	8.87	8.2e-16	11	11
[1026]		WP_011088524.1	12	14	55.2	9.68	2.6e-17	7	7	43	7.77	8.7e-14	9	10	51.1	9.37	9.8e-17	10	10	54.3	6.48	2.1e-11	7	7	37.1	7.97	3.7e-14	11	11	57.5	6.32	4.2e-11	10	10	54.3	8.51	3.7e-15	9	9	48.4	7.88	5.5e-14	11	12	59.3	10.8	2.2e-19	7	7
[1027]		WP_011084254.1	9	12	32.7	6.4	3e-11	10	12	38.2	7.16	1.2e-12	7	10	20.9	7.16	1.2e-12	15	17	48.1	7.26	7.7e-13	3	3	8.5	6.04	4.9e-11	6	7	23.5	6.35	3.8e-11	9	10	31.8	5.69	6.2e-10	6	7	19.4	6.36	3.7e-11	5	6	19.2	7.56	2.1e-13	11	11
[1028]		WP_028172427.1	9	10	29.3	8.81	1e-15	9	12	38.1	8.06	2.6e-14	10	14	40.8	8.54	3.4e-15	12	15	39.9	6.76	6.6e-12	3	3	13.9	4.13	1.3e-09	8	8	27.2	6.75	6.8e-12	7	7	29.9	6.72	7.9e-12	5	5	22.1	4.73	1.9e-09	11	14	40.8	8.77	1.2e-15	11	14
[1029]		WP_028175918.1	12	12	24.3	8.24	1.2e-14	15	15	24.1	8.7	1.7e-15	12	14	22.8	7.25	8.1e-13	15	16	35.4	5.87	2.9e-10	10	11	21	3.74	4.4e-08	13	15	25.6	6.71	8.1e-12	16	17	31.8	7.14	1.3e-12	12	13	26.6	7.99	1.9e-14	14	15	28.6	7.99	3.5e-14	13	15
[1030]		WP_011089083.1	12	13	33.2	6.63	1.2e-11	15	15	42.9	7.35	5.2e-13	14	14	36.6	7.49	2.9e-13	13	15	31.4	8.29	9.7e-15	14	15	33.8	8.39	6.4e-15	7	7	12.9	6.24	6.1e-11	11	13	30	7.72	1.1e-13	9	11	22.5	8.05	2.7e-14	12	12	28.6	7.91	4.8e-14	11	11
[1031]		WP_011088139.1	14	33	73.5	6.39	3.1e-11	12	17	72.7	6.18	7.6e-11	12	28	72.7	8.29	9.4e-15	11	16	72.7	7.4	4.2e-13	8	10	68.2	6.44	2.5e-11	11	16	72.7	6.48	2.1e-11	14	24	76.5	6.4	3e-11	13	19	72.7	6.62	1.2e-11	15	29	81.1	6.45	2.4e-11	13	22
[1032]		WP_011087774.1	10	11	33	8.53	3.5e-15	16	19	38.1	8.5	3.9e-15	11	12	29.6	8.86	8.4e-16	12	14	39	9.42	7.9e-17	8	10	22.4	9.2	1.9e-16	14	16	39	6.97	2.7e-12	13	17	41.3	7.26	7.8e-13	10	13	26.1	8.09	2.2e-14	11	13	28.9	8.47	4.5e-15	13	16
[1033]		WP_011090477.1	12	14	37.4	10.22	2.5e-18	10	12	33.6	11.39	1.8e-20	11	13	37.4	10.61	4.8e-19	11	13	37.4	10.47	8.6e-19	9	9	31.6	6.91	1.2e-12	12	14	37.4	8.65	2.1e-15	12	14	37.4	10.5	7.6e-19	10	11	37.4	10.5	7.8e-19	11	14	31.6	10.14	3.6e-18	10	11
[1034]		WP_011087821.1	11	11	37.7	7.66	1.4e-13	12	13	44.2	8.43	5.4e-15	11	11	32.1	6.82	5e-12	13	13	39.9	7.4	1.8e-13	14	14	35.7	6.33	4.1e-11	16	16	43.5	6.69	8.6e-12	12	12	41.6	8.51	3.7e-15	12	12	31.5	7.6	1.8e-13	13	13	40.3	6.55	1.6e-11	12	13
[1035]		WP_011087343.1	14	17	40.5	8.9	7.2e-16	12	13	41	6.88	3.9e-12	13	15	37.6	9.01	4.5e-16	14	14	43	8.04	2.8e-14	12	12	29.9	10.16	3.2e-18	13	15	46.1	8.96	5.6e-16	12	14	33.5	7.57	2e-13	8	9	23.7	6.56	1.5e-11	11	12	33.8	6.94	3e-12	12	16
[1036]		WP_011087683.1	9	14	52.2	7.79	7.9e-14	11	12	64	7.61	1.7e-13	11	15	63.1	9.22	1.8e-16	10	15	34	8.35	7.4e-15	10	12	35	8.2	1.4e-14	11	19	43.8	8.05	2.7e-14	12	18	64	8.61	2.5e-15	11	16	54.2	7.9	5.1e-14	12	20	63.5	11.41	1.6e-20	12	17
[1037]		WP_038965832.1	9	9	18.7	5.32	3.1e-09	11	11	18.7	5.48	1.5e-09	12	12	22.9	6.62	1.2e-11	16	17	35.2	7.62	1.7e-13	8	8	14.5	4.52	3.7e-10	8	8	17	6.04	1.4e-10	10	10	21	4.71	3.2e-09	8	8	15.6	5.78	4.3e-10	15	15	31.6	6.44	2.5e-11	15	16
[1038]		WP_011089383.1	7	8	23.6	8.1	2.1e-14	7	8	21.3	8.27	1e-14	10	10	29.3	7.99	3.5e-14	8	9	20.1	6.29	4.8e-11	9	9	24.1	8.29	9.7e-15	7	7	19.9	8	3.3e-14	8	8	29.7	7.47	3.1e-13	9	9	28.2	7.63	1.6e-13	12	14	31	8.44	5.1e-15	7	7
[1039]		WP_011088649.1	13	15	40.4	9.33	1.1e-16	11	12	32.6	8.87	8.1e-16	8	9	26.1	8.97	5.4e-16	12	12	36.5	8.29	9.8e-15	8	10	27.4	7.98	3.6e-14	13	13	39.1	9.06	3.6e-16	12	14	39.1	9.37	9.8e-17	12	13	34.5	8	3.3e-14	11	14	41	9.32	1.2e-16	12	13
[1040]		WP_011083346.1	12	17	40	7.95	4e-14	13	18	48.1	8.69	1.7e-15	12	20	40	6.5	2e-11	14	18	48.1	7.79	8e-14	10	12	30.4	7.11	1.4e-12	13	18	40	7.24	8.4e-13	11	16	38.8	8.39	6.2e-15	13	20	48.1	8.31	8.8e-15	12	22	40	8.25	1.2e-14	12	17
[1041]		WP_011084292.1	11	15	39	8.76	1.3e-15	13	19	42.4	9.54	4.6e-17	12	16	39	8.9	7.1e-16	9	13	32.6	7.63	1.6e-13	9	10	30.3	7.29	6.7e-13	10	15	32.6	7.91	4.7e-14	12	15	39	9.53	4.8e-17	14	20	45.1	9.71	2.3e-17	13	17	41.3	9.4	8.4e-17	10	14
[1042]		WP_011085007.1	8	9	12.5	7.7	1.2e-13	12	14	18.2	7.81	7.4e-14	11	11	18.6	7.94	4.3e-14	17	18	27.2	7.09	1.6e-12	13	14	24.8	7.22	9.3e-13	14	15	22.4	7.94	4.2e-14	13	14	20.2	7.9	5.1e-14	11	11	16.5	6.86	4.3e-12	10	11	13.5	8.24	1.2e-14	13	13
[1043]		WP_011086818.1	16	21	63.1	9.74	2e-17	11	13	42.1	6.38	3.3e-11	8	9	27.6	5.41	5.2e-10	11	11	40.7	6.91	3.5e-12	11	11	44.4	6.8	3.7e-12	11	11	37.4	7.61	1.7e-13	12	14	40.7	7.23	9e-13	11	11	40.7	6.12	9.9e-11	7	7	28	4.8	7.9e-10	8	8
[1044]		WP_011087786.1	12	13	42.9	7.49	2.9e-13	9	9	30.6	7.51	2.6e-13	10	10	35.1	8.26	1.1e-14	8	8	26.1	7.89	5.3e-14	9	9	35.4	6.96	2.8e-12	11	11	41.1	6.87	4.1e-12	11	12	37.8	8.31	8.7e-15	10	11	37.8	7.72	1.1e-13	11	13	39.9	9.09	3.2e-16	10	10
[1045]		WP_011085723.1	15	16	52.2	11.35	2.1e-20	11	13	41.2	10.46	9.2e-19	12	12	36.1	7.38	4.7e-13	11	12	33.7	6.36	2.8e-11	9	9	32	4.01	3.3e-08	13	14	47.8	6.8	5.6e-12	12	13	43.3	5.61	8.8e-10	9	9	33	4.72	2.1e-08	14	17	50.9	6.68	9.1e-12	11	16
[1046]		WP_011088963.1	12	18	36	6.82	5e-12	12	15	36	7.62	1.7e-13	13	23	36	8.93	6.3e-16	12	17	29	5.81	3.7e-10	12	18	29	6.85	4.4e-12	10	15	36	8.22	1.3e-14	14	21	36	8.07	2.4e-14	12	19	32.9	7.41	4.2e-13	11	16	36	6.62	1.2e-11	12	17
[1047]		WP_011085362.1	11	13	35.4	7.88	5.4e-14	12	13	24.1	6.91	3.4e-12	14	16	41.4	7.37	4.8e-13	15	17	35.4	6.99	2.4e-12	9	10	23.8	7.23	8.7e-13	14	15	34.2	8.46	4.6e-15	10	11	24.5	7.14	1.3e-12	12	13	38.9	7.65	1.5e-13	11	13	24.1	7.38	4.7e-13	15	16
[1048]		WP_011087082.1	12	15	59.4	10.4	1.2e-18	10	11	42.7	6.69	8.7e-12	10	11	42.7	8.12	2e-14	8	9	33.8	9.11	3e-16	7	8	32.1	10.62	4.6e-19	9	10	37.9	9.61	3.5e-17	11	13	49.5	8.17	1.6e-14	9	11	38.2	7.81	7.6e-14	9	11	36.9	7.15	1.2e-12	9	10
[1049]		WP_011090071.1	11	13	55.8	7.36	5.1e-13	10	13	47.5	6.9	3.6e-12	12	15	47.2	9.34	1.1e-16	12	15	54.9	8.7	1.7e-15	8	10	37.9	4.6	5.6e-09	11	15	57.9	9.23	1.7e-16	12	16	57	8.8	1.1e-15	11	13	51	7.37	4.8e-13	11	14	52.2	9.16	2.4e-16	10	13
[1050]		WP_011087422.1	14	17	41	7.54	2.4e-13	13	15	48.2	7.72	1.1e-13	11	15	45.9	9.47	6.2e-17	12	14	53.4	5.06	1.9e-10	3	3	13.4	1.37	4.4e-06	6	6	21.6	4.11	1.4e-09	7	8	30.8	4.26	1.3e-09	6	7	27.5	4.55	1.2e-09	13	17	48.2	7.55	2.2e-13	12	12
[1051]		WP_038967039.1	11	12	27.5	6.61	5.3e-12	10	10	27.5	5.38	9.7e-11	13	14	29.6	9.52	5e-17	12	13	29.8	8.11	2.1e-14	7	8	15.9	4.48	8.8e-10	16	17	34.5	7.96	3.8e-14	12	13	29.4	6.45	1.3e-11	12	12	22.8	6.64	1.1e-11	12	12	29.8	7.74	1e-13	11	11
[1052]		WP_011089945.1	14	19	78.7	10	6.6e-18	8	8	47.1	8.98	5.2e-16	8	10	61.9	9.28	1.4e-16	7	7	47.1	11.26	3.1e-20	5	5	31	8.28	3.4e-15	7	7	36.8	6.5	1.7e-11	11	12	49	8.86	8.3e-16	10	12	67.7	7.41	2e-13	11	14	56.1	9.3	1.3e-16	10	11
[1053]		WP_011087332.1	8	9	25.8	7.69	1.2e-13	9	10	32.7	5.07	1.3e-10	8	9	25	7.26	7.9e-13	10	10	35.4	7.31	6.3e-13	3	3	10.4	2.02	1.4e-06	8	8	23.1	6.72	7.7e-12	8	10	26.2	6.95	3e-12	11	11	39.6	7.85	4e-14	15	17	55.4	8.24	1.2e-14	11	11
[1054]		WP_028171641.1	13	14	63.7	6.79	5.8e-12	9	10	52.2	6.93	3.1e-12	12	13	53.1	7.26	7.7e-13	9	10	49.6	7.99	3.5e-14	7	7	39.8	4.59	2.8e-09	8	9	48.7	7.45	3.5e-13	9	10	52.2	7.67	1.4e-13	9	10	53.1	6.7	8.3e-12	8	9	52.2	7.25	8e-13	6	7
[1055]		WP_011088354.1	13	14	37.1	7.02	1.3e-12	13	14	26.2	7.55	2.2e-13	10	10	25	6.63	1.1e-11	10	11	21.8	6.76	6.7e-12	14	14	27.9	7.38	4.7e-13	11	11	21.8	7.01	2.3e-12	10	10	20.9	6.69	8.6e-12	12	13	25	7.36	5.1e-13	12	13	32.6	8.88	7.6e-16	9	9
[1056]		WP_011088738.1	13	14	42.9	8.9	7.1e-16	10	10	35.9	8.64	2.1e-15	12	14	40.7	9.64	3.1e-17	11	11	42.9	9.69	2.5e-17	12	12	42.5	4.99	3.3e-09	14	14	47.3	8.19	1.4e-14	12	12	44.3	8.29	9.6e-15	13	13	53.1	10.37	1.4e-18	11	13	39.2	8.73	1.4e-15	10	10
[1057]		WP_028172709.1	9	10	22.8	7.55	2.2e-13	8	10	26.7	7.82	7.1e-14	10	11	33.6	6.95	3e-12	11	14	26.7	11.04	7.7e-20	5	6	14.4	6.53	1.7e-11	9	10	30.8	8.57	2.9e-15	11	14	40	8.43	5.3e-15	8	11	29	6.87	4.1e-12	8	11	24.4	7.86	5.9e-14	12	15
[1058]		WP_011088609.1	14	14	21.8	8.76	1.3e-15	14	14	22.6	10.35	1.5e-18	13	13	20	10.5	7.6e-19	15	15	28.2	9.26	1.6e-16	11	11	17.5	8.59	2.6e-15	12	13	21.2	10.03	5.7e-18	13	14	20.3	9.71	2.3e-17	13	13	24	9.16	2.3e-16	11	11	17.1	8.14	5.5e-15	13	14
[1059]		WP_008141807.1	10	17	38	7.21	9.7e-13	8	8	38	6.98	2.6e-12	7	8	52.7	7.67	1.3e-13	13	17	62	9.84	1.3e-17	7	7	47.8	7.38	4.7e-13	13	14	66.8	7.24	8.4e-13	11	14	48.4	9.84	1.3e-17	12	15	72.8	10.49	8.2e-19	9	12	52.7	7.51	2.6e-13	12	13
[1060]		WP_011089498.1	14	16	41.3	7.88	5.5e-14	9	12	38	8.52	3.6e-15	11	13	26.5	8.02	3e-14	8	9	21.1	6.57	1.5e-11	9	10	29.2	8.11	2.1e-14	12	15	44.6	7.92	4.6e-14	12	13	29.2	7.33	5.6e-13	9	12	34.6	7.24	8.5e-13	12	13	34.6	8.16	1.7e-14	9	11
[1061]		WP_011088528.1	12	12	30	7.35	5.2e-13	12	15	29.2	7.79	8.1e-14	15	16	37.1	7.11	1.5e-12	12	13	25.8	7.21	7e-13	8	8	19.7	3.46	5.3e-08	8	8	18.1	5.25	2.9e-10	9	9	21.7	6.25	5.7e-11	11	11	28.4	6.34	3.9e-11	14	17	33.3	8.2	1.4e-14	18	23
[1062]		WP_011089483.1	13	15	45	8.96	5.6e-16	10	12	34.2	8.32	8.5e-15	12	14	39.9	8.46	4.7e-15	14	15	41.6	9.37	9.6e-17	6	8	25.1	6.89	3.8e-12	8	10	28.2	7.52	2.5e-13	7	8	23.6	7.5	2.8e-13	7	8	28.8	6.85	4.5e-12	10	12	39.3	8.61	2.4e-15	11	13
[1063]		WP_161537124.1	8	10	31.6	8.49	4.1e-15	9	11	33.8	7.66	1.4e-13	11	12	52.8	7.61	1.7e-13	9	11	36.4	8.21	1.3e-14	7	9	22.5	7.5	2.7e-13	12	15	48.1	6.53	1.7e-11	15	18	54.5	6.6	1.3e-11	12	17	51.1	8.18	1.6e-14	9	11	40.7	8.6	2.5e-15	13	15
[1064]		WP_038966683.1	12	13	25.7	6.12	1.3e-11	14	15	32	7.41	4e-13	13	14	26.5	7.91	4.8e-14	13	14	29.8	6.98	2.5e-12	2	2	4.5	2.61	1.1e-06	5	5	10.1	3.14	3.7e-07	4	4	7.8	5.04	1e-08	5	5	9.6	4.69	5.7e-11	14	15	30.6	6.08	1.2e-10	15	15
[1065]		WP_011084133.1	12	15	48.9	6.93	3.2e-12	9	12	26.9	6.35	3.7e-11	12	13	37.9	6.68	9e-12	8	8	29.7	7.14	1.3e-12	9	11	38.5	6.56	1.5e-11	13	15	39.1	7.31	6.2e-13	14	17	46.2	7.33	5.7e-13	12	14	44	7.03	2.1e-12	11	14	44.3	6.05	1.3e-10	10	11
[1066]		WP_011084304.1	10	16	50.8	9.25	1.6e-16	6	8	35.1	8.51	3.8e-15	7	11	40.1	9.3	1.3e-16	7	9	34.7	8.63	2.3e-15	7	10	35.1	8.7	1.7e-15	11	14	50.8	9.28	1.4e-16	7	11	42	8.2	1.4e-14	7	10	42	8.32	8.4e-15	7	11	43.9	9.14	2.5e-16	8	12
[1067]		WP_011085849.1	10	11	30.1	8.03	2.9e-14	8	9	31.3	8.11	2.1e-14	12	15	39.4	7.25	8.1e-13	11	13	52.1	8.92	6.5e-16	8	8	43.6	9.1	3.1e-16	10	12	42.9	8.65	2.1e-15	8	10	27	8.99	4.8e-16	11	11	40.5	8.37	7e-15	9	13	40.5	8.63	2.3e-15	11	12
[1068]		WP_011085702.1	9	13	33.7	8.04	2.8e-14	9	12	37.6	9.09	3.2e-16	10	10	40.9	8.24	1.2e-14	10	11	32	7.71	1.2e-13	13	15	41.6	7.04	2e-12	15	18	48.5	7.16	1.2e-12	13	16	51.8	9.09	3.2e-16	11	15	40.3	7.79	7.9e-14	11	13	40.6	9.05	3.8e-16	11	14
[1068-1]	6	WP_011089553.1	4	4	15.4	5.16	6.5e-11	3	3	11.1	5.15	1.7e-10	3	3	11.8	4.85	1e-10	4	4	14.4	5.04	5.2e-09	5	5	17.4	5.27	3.7e-10	4	4	13.1	5.7	2.6e-10	6	6	24.6	4.91	3.6e-10	3	3	11.8	5.32	6e-11	5	5	20	4.85	3.5e-10	4	4
[1069]		WP_028175651.1	12	17	59	9.58	3.9e-17	7	9	30.4	7.08	1.6e-12	9	15	44.1	10.21	2.7e-18	7	10	44.1	7.61	1.7e-13						3	4	19.9	5.88	2.8e-10	4	5	19.9	6.82	5.1e-12	3	4	19.9	5.36	8.6e-10	9	14	44.1	8.05	2.7e-14	9	12
[1070]		WP_011084688.1	11	11	33.7	10.2	2.8e-18	11	12	29.8	9.68	2.6e-17	11	11	35.3	10.17	3.2e-18	10	10	27.1	7.58	2e-13	6	6	13.6	7.2	2.8e-13	8	8	23.8	9	4.6e-16	6	7	17.4	6.58	1.4e-11	6	6	19.4	10.38	1.3e-18	11	12	31.6	9.8	1.6e-17	8	8
[1070-1]	17	WP_011083548.1	7	8	17.5	6.44	2.6e-11	9	9	23.6	7.92	4.6e-14	10	10	24.2	6.69	8.7e-12	8	8	25	7.6	1.8e-13	6	7	18.4	6.31	1.2e-12	8	9	16.4	7.95	4.1e-14	8	9	23.5	8.23	1.3e-14	8	8	19.7	7.2	9.8e-13	7	7	20.9	6	1.7e-10	5	5
[1071]		WP_011088713.1	12	14	53.7	9.59	3.8e-17	9	10	45.9	7.03	2.7e-13	10	12	60.7	9.07	3.5e-16	9	10	58.5	7	2.4e-12	11	12	56.3	11.78	3.3e-21	12	16	68.6	8.31	8.7e-15	10	12	59	9.8	1.5e-17	10	12	53.7	10.11	4.1e-18	10	12	59.4	8.67	1.9e-15	9	10
[1072]		WP_011083050.1	15	18	47.1	8.66	2e-15	13	13	35.2	6.75	6.8e-12	13	14	41.6	8.1	2.1e-14	14	14	44.9	6.5	2e-11	10	10	27.4	6.88	8.4e-13	16	17	48.2	7.57	2.1e-13	9	10	29.1	8.82	1e-15	13	14	33	6.6	1.3e-11	14	15	45.4	9.16	2.4e-16	12	12
[1073]		WP_011088715.1	14	17	42.2	8.13	1.9e-14	8	8	33	8.29	9.5e-15	9	10	36.2	8.13	1.9e-14	6	6	29.8	7.27	7.3e-13	8	8	30.5	8.84	9.4e-16	8	9	36.2	7.9	5.1e-14	12	13	41.1	8.23	1.3e-14	11	11	36.2	7.88	5.6e-14	10	14	38.3	8.67	1.9e-15	8	8
[1074]		WP_028175426.1	13	13	32	7.75	9.5e-14	15	15	31.4	6.52	1.8e-11	12	13	28.6	7.64	1.5e-13	14	14	28.8	7.35	5.2e-13	11	12	23.1	5.03	3.8e-10	16	16	36.2	6.67	6.3e-13	14	14	33.9	7.21	9.4e-13	10	11	22.7	7.03	2.1e-12	14	14	32.8	7.62	1.7e-13	17	17
[1075]		WP_038965409.1	12	13	12.6	6.96	1.5e-12	15	17	14.8	7.1	1.5e-12	13	14	12.2	7.49	2.9e-13	13	13	13.3	7.61	1.7e-13	17	17	18.2	5	3.4e-09	16	17	16.3	5.74	5.1e-10	11	12	11.3	5.77	4.3e-10	12	13	12	6.67	9.6e-12	15	18	14.7	9.66	2.7e-17	14	16
[1076]		WP_038967118.1	11	14	36.2	7.85	6.4e-14	9	12	36.2	7.46	3.3e-13	14	17	52.8	9.48	6.1e-17	11	11	45.7	7.14	1.3e-12	7	7	29.1	6.28	3.1e-11	11	13	40.4	8.36	7e-15	11	14	34.7	7.87	5.9e-14	12	16	40.4	8.23	1.2e-14	10	14	37.4	7.88	5.5e-14	9	12
[1077]		WP_011085417.1	11	15	40.1	8.41	5.7e-15	11	15	34.8	7.36	5.1e-13	12	15	45.3	8.01	3.2e-14	10	10	31.8	7.56	2.1e-13	7	7	24	7.21	9.5e-13	13	14	43.4	9.07	3.4e-16	12	16	37.3	8.27	1.1e-14	12	14	43.1	7.52	2.5e-13	11	16	37	8.86	8.6e-16	9	10
[1078]		WP_038966431.1	12	14	44.1	8.33	8.1e-15	11	13	39.8	8.24	1.2e-14	13	15	51.7	7.8	7.8e-14	12	14	45.6	7.88	5.5e-14	11	12	36.2	6.16	8.5e-11	11	12	42.9	7.55	2.2e-13	11	13	41.6	7.75	9.4e-14	12	15	45.6	8.42	5.6e-15	14	15	49.2	8.97	5.2e-16	12	14
[1079]		WP_011087725.1	9	32	60.4	9.65	2.9e-17	9	26	60.4	7.56	2.1e-13	10	37	60.4	11.26	3e-20	8	27	45.9	8.48	4.3e-15	9	17	54.7	10.92	1.3e-19	9	30	60.4	8.24	1.2e-14	10	33	60.4	8.66	2e-15	9	29	60.4	9.46	6.7e-17	11	30	63.5	8.23	1.3e-14	10	31
[1080]		WP_011083396.1	12	13	43.7	7.91	4.8e-14	12	14	38.7	7.31	6.4e-13	10	13	45.9	8.6	2.5e-15	10	11	37.8	8.34	7.9e-15	9	11	34.5	7.35	5.2e-13	11	11	42.3	9.34	1.1e-16	14	17	46.5	8.28	1e-14	8	11	33.3	9.05	3.8e-16	11	13	41.7	7.76	9e-14	10	12
[1081]		WP_011083566.1	13	15	32.5	8.64	2.2e-15	10	12	27.6	6.89	3.8e-12	12	14	31	8.84	9.3e-16	13	13	31	9.24	1.6e-16	14	15	32.5	7.47	3.1e-13	13	15	31	8.46	4.7e-15	9	11	27.6	8.97	5.3e-16	10	12	31	7.63	1.6e-13	12	14	30.7	8.57	2.9e-15	14	16
[1082]		WP_038965370.1	9	10	27.7	8.45	4.9e-15	12	18	36.3	9.65	2.9e-17	9	12	21.5	9.08	3.3e-16	13	13	34.2	7.7	1.2e-13	10	10	25	7.99	1.6e-14	9	10	23.5	7.68	1.3e-13	8	10	20.5	7.11	1.5e-12	9	10	22.9	7.62	1.7e-13	11	14	34.5	8.01	3.2e-14	11	13
[1083]		WP_011089740.1	12	13	35.1	6.34	3.9e-11	13	18	33	6.79	5.8e-12	14	16	43	9.44	7e-17	14	15	40.6	7.95	4.2e-14	9	9	23	4.28	9.9e-09	10	11	29.3	4.71	1.4e-09	10	12	26.9	8.08	2.4e-14	10	11	27.5	4.87	2e-09	11	14	32.1	8.73	1.5e-15	11	14
[1084]		WP_028173595.1	11	23	51.3	9.12	2.7e-16	9	13	51.3	9.49	5.7e-17	11	16	56.5	8.65	2.1e-15	10	14	51.3	8.69	1.8e-15	7	9	41.3	4.49	2e-08	10	16	51.3	9.06	3.5e-16	11	19	51.3	9.44	7.1e-17	10	18	40	9.71	2.3e-17	11	17	56.5	9.6	3.5e-17	9	13
[1085]		WP_011082976.1	9	11	25.4	9.23	1.7e-16	14	14	39.7	7.34	5.5e-13	9	10	28.7	8.82	1e-15	12	12	31.2	9	4.7e-16	8	8	26.2	6.89	1.6e-12	10	10	27.4	7.72	1.1e-13	10	11	29.9	7.95	4.1e-14	11	11	32.2	8.02	3.1e-14	13	14	39.7	8.6	2.5e-15	13	14
[1086]		WP_028172288.1	11	14	49.8	9.47	6.4e-17	10	15	42.2	8.74	1.4e-15	10	13	47	9.92	9.3e-18	12	14	43.2	9.64	3.1e-17	8	10	27.9	4.31	3.3e-09	10	11	47	10.01	6.4e-18	12	17	49.8	9.28	1.4e-16	11	15	59.6	9.54	4.7e-17	12	18	47	9.55	4.5e-17	12	15
[1087]		WP_011088357.1	11	15	61.6	8.84	9.4e-16	6	6	39.2	7.78	8.4e-14	7	7	40.8	8.19	1.5e-14	6	6	38	4.84	1.5e-09	5	6	27.8	7.33	5.7e-13	6	6	36.7	7.86	6e-14	6	7	41.6	6.73	7.6e-12	8	8	45.3	7.9	5.1e-14	11	12	56.3	8.67	1.9e-15	10	10
[1088]		WP_011086899.1	13	16	55.5	9.18	2.1e-16	11	13	48.7	6.48	2.1e-11	13	16	56.3	8.84	9.3e-16	10	10	37.5	9.61	3.4e-17	6	7	19.9	6.42	2.8e-11	12	15	46.8	9.51	5.3e-17	10	14	44.3	7.71	1.1e-13	10	14	49.6	9.48	6e-17	12	15	51.8	8.48	4.2e-15	8	10
[1089]		WP_028174622.1	10	12	50.7	7.02	2.1e-12	11	12	41.2	7.2	1e-12	9	9	37.1	6.92	3.3e-12	9	10	48.5	7.46	3.4e-13	9	9	41.2	6.8	5.6e-12	9	10	44.9	8.71	1.6e-15	12	13	64.3	11.6	7e-21	12	13	57.4	7.64	1.5e-13	12	13	49.3	6.9	3.6e-12	11	12
[1090]		WP_011088597.1	11	12	28.2	8.06	2.6e-14	12	12	25.8	5.84	1.8e-10	11	11	28.7	5	1.2e-08	14	15	30.5	5.78	4.3e-10	12	12	25.6	6.25	5.1e-11	16	17	35.7	5.93	2.3e-10	13	13	33.2	7.86	6e-14	13	13	34.6	7.83	6.9e-14	13	13	26.6	6.31	4.4e-11	15	15
[1091]		WP_011085224.1	9	10	21.8	7.97	3.8e-14	9	10	30.7	8.17	1.6e-14	9	11	22.1	8.86	8.4e-16	10	12	35.5	7.78	8.3e-14	10	13	35.5	6.85	4.5e-12	12	14	38	8.6	2.5e-15	8	12	22.1	7.97	3.8e-14	11	14	30.7	8.37	6.7e-15	10	13	26.8	7.94	4.3e-14	10	11
[1092]		WP_011089469.1	13	14	37	9.59	3.7e-17	10	11	31.1	7.24	8.4e-13	14	17	37.5	7.63	1.6e-13	13	14	40.1	8.35	7.4e-15	7	7	13.1	4.99	1e-09	13	15	37.8	7.57	2.1e-13	10	12	35.7	7.47	3.1e-13	13	16	37.5	7.25	8e-13	11	14	32.4	8.44	5e-15	9	9
[1093]		WP_011088782.1	8	8	8.6	4.18	2.3e-09	15	15	15.1	6.74	3.4e-12	13	13	15.1	4.74	9.7e-09	11	11	11	7.17	7.6e-13	5	5	6.1	3.72	2.1e-08	12	12	13.9	6.44	3.8e-12	14	14	15.3	6.93	2.7e-12	11	11	12.7	7.27	7.4e-13	18	18	21.1	6.86	1.9e-12	13	13
[1094]		WP_011082971.1	14	15	38.3	7.77	8.9e-14	14	15	35	10.5	7.8e-19	15	17	36	10.95	1.1e-19	15	18	39.9	10.13	3.8e-18	12	13	34.5	4.97	3.8e-11	14	14	39.1	4.93	1.6e-08	13	14	33.7	8.85	8.7e-16	12	13	32.9	8.32	8.3e-15	14	16	35.8	9.2	2e-16	15	17
[1095]		WP_038967018.1	11	13	38.4	9.02	4.3e-16	9	10	36.4	8.62	2.3e-15	10	12	40.4	8.14	1.8e-14	10	14	36.4	8.23	1.2e-14	8	10	19.2	8.73	1.5e-15	13	15	43.8	7.26	7.7e-13	13	15	45.8	8.72	1.6e-15	8	10	30.7	8.26	1.1e-14	13	15	45.8	7.47	3.2e-13	12	15
[1096]		WP_011088190.1	14	16	45.5	8.17	1.6e-14	11	12	40	5.53	8.3e-10	12	12	40	6.94	3e-12	11	11	40	5.67	6.3e-10	9	9	35.7	7.06	1.8e-12	11	13	44.7	7.76	9e-14	9	9	40	5.47	1.2e-09	10	10	38	5.58	1e-09	10	11	38	8.04	2.8e-14	11	12
[1097]		WP_011088558.1	14	23	63.5	10.75	2.7e-19	12	20	60.1	6.88	3.8e-12	10	18	45.1	7.09	1.6e-12	12	19	66.9	9.79	1.6e-17	8	14	27.3	5.85	3.2e-10	10	16	59.5	7.82	7e-14	13	24	51.8	6.86	4.3e-12	13	22	66.3	6.66	9.9e-12	14	27	60.4	5.6	9.2e-10	13	21
[1098]		WP_011090842.1	14	14	64.1	10.4	1.2e-18	6	6	27.1	9.65	2.9e-17	7	8	33.9	10.96	1.1e-19	7	8	34.7	9.85	1.2e-17	7	8	39.8	10.62	4.6e-19	8	8	43	10.07	4.8e-18	9	9	41.8	10.26	2.2e-18	12	13	72.9	10.32	1.7e-18	6	6	27.9	10.53	6.8e-19	6	6
[1099]		WP_011088206.1	14	14	56	8.38	6.7e-15	8	9	30.2	9.78	1.7e-17	8	10	31.6	8.22	1.3e-14	4	5	15.8	6.32	4.2e-11	6	6	22.7	6.94	3e-12	9	9	38.1	6.53	1.8e-11	9	9	39.2	8.45	4.9e-15	10	11	45.7	7.71	1.1e-13	10	11	40.5	8.08	2.3e-14	7	7
[1100]		WP_038967448.1	12	13	33	8.03	2.9e-14	13	14	33.9	8.22	1.3e-14	9	10	25.4	9.1	3.1e-16	11	11	35	8.97	5.3e-16	5	5	16.5	4.75	3.7e-11	13	14	37.1	9.35	1e-16	11	12	32.4	8.68	1.8e-15	13	14	35.7	9.61	3.5e-17	13	14	34.8	9.74	2e-17	12	13
[1101]		WP_011083204.1	12	13	62.9	9.51	5.3e-17	8	9	35.8	7.75	5.9e-14	12	13	64.6	8.88	7.6e-16	8	9	36.7	7.57	2e-13	8	8	41.7	4.12	1e-10	10	11	45.8	9.35	1e-16	11	12	60	8.01	3.2e-14	13	14	64.6	8.67	1.9e-15	10	11	53.3	6.78	5.9e-12	10	11
[1102]		WP_011085409.1	13	17	49.2	7.74	1e-13	12	14	49.6	7.29	7e-13	8	11	32.8	7.8	7.8e-14	9	11	37.6	6.77	5e-12	8	9	35.6	5.65	7.3e-10	16	18	50	6.79	5.6e-12	11	13	46.4	7.15	1.2e-12	11	16	43.2	7.21	9.5e-13	11	15	46.4	7.04	2e-12	11	13
[1102-1]	9	WP_011084833.1	7	7	27.3	5.4	9.8e-11	4	4	14.4	3.39	3.4e-08	2	2	6.1	1.01	0.00011	5	5	17.6	3.61	7.3e-08	4	4	14.4	1.92	2.9e-06	6	6	24.8	3.36	4.2e-07	4	4	15.1	3.38	2.1e-08	5	5	21.9	2.83	1.4e-07	3	3	12.9	0.63	0.00013	3	3
[1103]		WP_011084309.1	12	13	37.3	9.65	2.9e-17	11	12	34.6	8.34	7.6e-15	14	14	47.5	8.36	7.2e-15	8	8	36.6	4.41	1.5e-07	3	3	14.2	3.28	8.3e-08	6	6	22.7	6.86	2.9e-12	5	5	15.6	3.55	7.6e-07	6	6	23.1	7.91	4.7e-14	12	12	50.2	7.81	7.6e-14	11	12
[1104]		WP_038966101.1	13	19	51	8.54	3.3e-15	9	10	35	7.98	3.5e-14	11	14	48.3	8.48	4.2e-15	8	9	28.6	6.48	2.1e-11	9	10	34.4	6.66	1.9e-12	12	14	55.4	8.53	3.4e-15	9	11	34.4	6.74	7.1e-12	12	14	51	7.42	3.9e-13	8	9	32	8.09	2.2e-14	10	11
[1105]		WP_011083584.1	10	13	39.9	7.73	1.1e-13	7	9	35.6	6.23	6.1e-11	10	11	47.8	6.13	5.1e-11	11	14	54.2	8.87	8.2e-16	9	9	39.5	6.62	1.6e-13	14	18	60.9	9.8	1.5e-17	10	13	46.6	10.44	9.9e-19	11	13	45.8	5.49	1.5e-09	9	11	40.3	7.12	2.7e-13	8	10
[1106]		WP_011090280.1	13	17	49	8.67	1.9e-15	11	13	39.1	8.74	1.4e-15	12	15	32.7	7.81	7.3e-14	10	14	41.5	8.95	5.7e-16	10	11	28.2	4.47	1.4e-09	11	12	40.1	10.03	5.7e-18	15	18	44.2	6.79	5.8e-12	14	18	44.2	11.44	1.4e-20	11	14	42.5	8.95	5.8e-16	12	13
[1107]		WP_011087362.1	11	11	22.4	5.67	8.3e-11	9	9	25.6	5.72	1.4e-10	10	10	21.8	7.47	3.2e-13	9	9	20.2	7.66	1.4e-13	9	10	23.2	5.8	1.7e-11	10	10	21.8	5.37	1.5e-10	11	12	25.6	6.9	1.3e-12	14	14	28.8	8.61	2.4e-15	7	8	15.2	4	1.7e-07	8	8
[1108]		WP_011085817.1	10	13	44.4	9.65	2.9e-17	8	11	25.6	9.13	2.7e-16	12	13	54.1	8.77	1.3e-15	9	11	30.9	7.34	5.5e-13	7	8	30.9	7.29	6.9e-13	8	9	36.9	8.36	7e-15	9	11	51.2	9.46	6.4e-17	11	13	47.8	9.34	1.1e-16	7	8	25.9	7.93	3.6e-14	11	12
[1109]		WP_011090547.1	12	14	55.8	10.2	2.8e-18	6	7	33.6	6.26	5.4e-11	9	11	46	7.56	2.1e-13	7	9	34.3	6.94	3e-12	10	11	47.2	8.29	9.4e-15	9	11	38.5	7.62	1.6e-13	10	11	46.8	7.7	1.2e-13	8	8	37.7	7.56	2.2e-13	9	10	46.8	7.97	3.8e-14	10	14
[1110]		WP_011090186.1	10	11	65.8	7.01	2.3e-12	7	10	32.1	7.73	1e-13	13	16	80.6	7.57	2e-13	11	13	66.8	6.06	1.3e-10	10	10	51	4.88	6.1e-09	11	15	70.9	7.89	5.3e-14	8	11	51	8.83	9.7e-16	8	11	56.6	8.41	5.7e-15	9	11	69.4	7.98	3.5e-14	11	13
[1111]		WP_011085408.1	11	11	43.7	13.59	1.4e-24	12	14	36.3	10	6.6e-18	9	9	28.3	9.5	5.6e-17	8	9	26.8	8.13	1.8e-14	10	11	32.9	7.99	3.4e-14	11	12	37.5	9.34	1.1e-16	12	13	34.8	11	9.3e-20	12	12	36.9	8.9	7.2e-16	9	9	30.5	8.91	6.7e-16	6	6
[1112]		WP_011083174.1	10	10	34.5	9.59	3.7e-17	11	13	37.6	8.41	5.7e-15	12	13	44.9	9.47	6.2e-17	11	12	39.5	9.53	4.8e-17	7	7	21.7	5.45	3.4e-10	12	13	44.7	8.38	6.4e-15	10	11	34.5	9.44	7.2e-17	10	10	33.3	6.23	4.5e-11	10	11	31.7	9.79	1.6e-17	11	12
[1113]		WP_231166508.1	10	13	47.2	11.3	2.5e-20	10	11	58.5	12.81	4.1e-23	9	13	58.5	9.78	1.7e-17	10	13	48.7	9.07	3.5e-16	9	11	49.2	7.18	1.1e-12	8	13	47.2	10.01	6.2e-18	9	12	56.9	11.79	3.2e-21	8	10	47.2	10.59	5.3e-19	9	13	40.5	12.38	2.6e-22	11	13
[1114]		WP_011083635.1	10	13	38.7	8.39	6.4e-15	8	11	32.5	7.4	4.2e-13	12	14	45.2	10.14	3.6e-18	7	8	32.1	8.31	8.8e-15	10	11	32.5	7.9	5.1e-14	10	14	40.7	8.31	8.9e-15	12	17	40.7	9.49	5.8e-17	11	15	45.6	9.11	2.9e-16	11	17	41	8.31	8.9e-15	13	16
[1115]		WP_038967027.1	15	16	40.9	7.37	4.9e-13	14	16	37	7.06	6.3e-13	12	16	33.9	9.89	1e-17	12	13	29.7	5.81	2.4e-10	11	11	24.5	8.08	2.3e-14	10	12	32.6	6.14	5.4e-11	12	14	32.8	5.8	4.6e-11	14	17	29.4	11.81	2.9e-21	11	13	28.6	5.66	1.2e-11	11	14
[1116]		WP_011089546.1	12	18	38.6	9.14	2.5e-16	6	8	20.5	5.81	3.8e-10	11	13	49.8	6.8	5.4e-12	8	10	22.8	6.99	2.5e-12	10	12	37.1	7.9	5e-14	9	12	32.4	8.77	1.2e-15	7	9	24.7	5.44	1.9e-09	11	15	50.2	6.7	8.6e-12	12	15	51.4	6.38	3.3e-11	8	11
[1117]		WP_257784524.1	12	14	44.4	8.67	1.9e-15	11	12	44.4	9.22	1.8e-16	12	15	44.4	10.24	2.3e-18	11	12	44.4	7.9	5e-14	8	9	29.1	8.24	1.2e-14	12	12	41.5	7.96	3.9e-14	11	11	41.5	7.9	5.1e-14	11	12	44.4	8.32	8.4e-15	10	12	42.3	8.58	2.8e-15	10	12
[1118]		WP_011089317.1	13	20	51.1	8.05	2.7e-14	10	11	50.2	7.77	8.9e-14	10	14	51.1	8.13	1.9e-14	10	12	51.1	7.36	5e-13	9	10	46.4	7.75	9.7e-14	12	14	51.1	8.21	1.4e-14	9	11	51.1	8.63	2.2e-15	13	15	42.2	7.51	2.7e-13	10	12	51.9	8.34	7.7e-15	9	11
[1119]		WP_038965680.1	11	14	33.5	7.94	4.3e-14	11	12	31.3	7.85	6.3e-14	12	14	33.9	7.77	8.7e-14	13	16	42	7.49	2.9e-13	9	9	28.5	6.96	2.8e-12	12	15	40.4	7.65	1.4e-13	10	11	40.1	8.05	2.6e-14	9	10	28.2	7.32	5.9e-13	13	15	40.8	8.91	6.8e-16	14	17
[1120]		WP_011086231.1	8	8	24.2	10.26	2.1e-18	9	9	29.1	9.83	1.3e-17	9	9	28.4	7.32	6.1e-13	7	7	26.2	9.39	8.9e-17	2	2	5.4	2.22	1.2e-07	6	6	21.5	7.82	1.2e-14	3	3	11.4	7.64	1.5e-13	6	6	19.5	7.37	4.9e-13	10	10	31.6	8.12	2e-14	11	12
[1121]		WP_011083268.1	14	15	80.8	9.11	2.9e-16	10	10	68.9	5.51	1.4e-09	14	15	83.8	8.21	1.3e-14	6	6	24	5.33	2.3e-09	4	4	20.4	3.31	1.5e-08	7	7	58.7	6.69	6.9e-12	10	10	53.9	4.99	5.4e-09	10	10	70.1	6.64	1.1e-11	10	10	55.7	4.84	2.3e-08	9	9
[1122]		WP_011087259.1	13	15	49.9	8.67	1.9e-15	7	9	26.6	8.28	1e-14	10	11	40.7	7.59	1.9e-13	6	7	26.6	7.22	9.3e-13	13	16	45.5	10.18	3e-18	8	10	29.7	9.6	3.6e-17	9	10	33	8.29	9.6e-15	11	13	43.5	8.7	1.6e-15	10	11	42.5	8.12	2e-14	7	9
[1123]		WP_011087920.1	11	14	52.7	8.91	6.7e-16	8	11	37.5	7.05	1.9e-12	12	15	44.5	6.85	4.5e-12	9	11	39.2	5.93	2.3e-10	8	9	31.8	6.27	5.3e-11	10	13	39.6	6	1.7e-10	11	14	57.2	9.12	2.7e-16	8	10	33.9	7.41	4e-13	8	10	35.3	7.53	2.4e-13	9	11
[1124]		WP_011083261.1	9	9	31.7	8.96	5.6e-16	8	9	26.9	7.29	6.9e-13	8	8	25.1	8.19	1.5e-14	7	7	26.7	5.74	5.1e-10	7	7	24.4	7.3	6.6e-13	11	11	36.3	6.07	1.2e-10	10	11	32.6	8.21	1.4e-14	10	10	29.7	8.3	9e-15	13	14	46.7	8.93	6.4e-16	10	11
[1125]		WP_011085664.1	11	12	28.1	7.52	2.6e-13	9	9	20.7	6.45	2.4e-11	11	13	29.8	7.49	2.9e-13	10	11	25.4	8.04	2.8e-14	4	4	8.1	4.49	1.4e-09	4	4	10.3	5.33	2.3e-10	8	9	19	4.69	4.2e-09	8	9	19	5.73	5.3e-10	12	14	34.9	7.6	1.8e-13	10	10
[1126]		WP_011086712.1	10	11	18.9	8.29	9.4e-15	15	16	25.3	7.02	2.1e-12	13	13	26.8	7.6	1.8e-13	12	12	24.3	7.22	9.3e-13	11	13	21.9	6.59	1.3e-11	14	16	27.4	9.07	3.4e-16	15	15	29.2	8.97	5.2e-16	12	16	23	7.18	1.1e-12	14	15	29.2	8.69	1.8e-15	12	12
[1126-1]	1	WP_011087566.1	1	1	1.9	5.5	1.4e-09	1	1	1.9	4.9	4.8e-09	1	1	1.9	4.18	2.8e-08	1	1	1.9	2.06	2.4e-06	1	1	1.9	5.13	6.4e-10	2	2	7.1	5.4	5.8e-10	1	1	1.9	5.25	4.1e-09	1	1	1.9	1.68	2.2e-05	1	1	1.9	5.18	2.3e-09	1	1
[1127]		WP_011084277.1	10	10	22.6	8.16	1.6e-14	11	12	23	7.15	1.3e-12	12	13	27.5	7.3	6.7e-13	15	16	32.1	7.16	1.2e-12	9	9	18.3	6.51	1.9e-11	14	14	33.3	7.33	5.9e-13	10	10	23	7.42	3.9e-13	7	7	16.5	8.28	1e-14	11	12	23.9	7.74	1e-13	13	14
[1128]		WP_011087585.1	11	15	45.8	21.49	3.5e-39	4	4	19.7	5.79	3e-12	7	7	38	11.98	1.4e-21	6	7	26.8	3.83	8.2e-08	6	6	23.2	3.56	1.4e-08	4	4	17.3	3.76	2.2e-08	5	5	24.6	5.99	1.7e-10	6	6	34.5	8.67	2.3e-16	8	8	37	12.34	3.1e-22	6	6
[1129]		WP_011089790.1	8	8	12.1	6.47	2.3e-11	11	11	17.4	6.74	7e-12	16	17	25.6	6.86	4.2e-12	9	10	16.8	7.01	2.3e-12	9	10	12.5	5.71	5.7e-10	8	8	15.3	6.81	4.4e-12	7	7	10.5	4.43	4.5e-09	5	5	7.6	5.02	7e-10	13	14	20.1	7.66	1.4e-13	9	9
[1130]		WP_011084417.1	14	16	34.7	8.12	2e-14	8	10	21.9	7.36	5e-13	12	14	25.4	6	1.7e-10	14	14	30.6	6.45	2.5e-11	9	9	15.1	6.34	4.4e-12	15	17	29	5.41	2e-09	13	15	25.6	7.98	3.5e-14	8	9	21	7.09	1.6e-12	14	17	31	7.6	1.8e-13	14	17
[1131]		WP_011089570.1	8	9	45.8	10.39	1.3e-18	7	8	36.4	9.9	1e-17	9	11	47.6	9.61	3.5e-17	6	7	25.2	9.01	4.4e-16	7	7	33	7.06	9.7e-13	11	12	48.4	9.67	2.6e-17	8	9	43	10.16	3.3e-18	9	10	51.9	10.84	1.8e-19	9	11	49.9	11.17	4.5e-20	5	5
[1132]		WP_011088531.1	8	10	46.8	11.34	2.2e-20	7	9	42.5	11.32	2.3e-20	6	8	26.9	8.78	1.2e-15	10	12	51.6	11.38	1.8e-20	9	12	46.2	11.07	6.9e-20	10	12	42.5	13.12	1.1e-23	8	10	41.9	13.11	1.1e-23	8	10	46.8	9.34	1.1e-16	6	8	30.1	6.41	2.9e-11	7	9
[1133]		WP_011086018.1	11	13	25.3	5.77	1.5e-10	10	10	26.7	6.99	1e-12	8	11	15.7	10.09	4.5e-18	13	15	28.9	7.17	1.2e-12	3	3	5.8	3.41	1.6e-07	8	9	24.1	7.03	2e-12	8	8	18.9	7.11	5.3e-13	6	6	14.3	3.8	2.6e-09	11	12	29.5	6.33	4.2e-11	14	14
[1134]		WP_011090641.1	12	13	39.9	7.06	1.8e-12	12	13	39.9	7.78	8.6e-14	9	10	28.7	6.93	3.1e-12	12	13	41.2	6.49	2.1e-11	10	11	31.8	6.84	1.6e-12	13	15	41.8	7.95	4.1e-14	14	15	42.9	7.28	7.2e-13	14	15	46.1	7.14	1.3e-12	11	12	29.9	7.09	1.6e-12	8	8
[1135]		WP_236842067.1	12	15	50.8	8.66	2e-15	3	3	14.4	5.31	2.6e-09	4	5	19.1	6.49	2.1e-11	5	6	26.8	5.86	1.5e-11	5	5	21.3	5.75	4.8e-10	7	9	34.8	5.38	2e-10	7	7	36.7	6.13	9.4e-11	7	7	31.2	6	1.7e-10	12	14	50.8	7.07	1.8e-12	9	11
[1136]		WP_011090624.1	11	12	58.4	10.69	3.4e-19	9	10	39.9	10.33	1.6e-18	9	10	42.9	10.05	5.4e-18	8	9	36.9	9.85	1.2e-17	6	7	30.9	7.78	8.4e-14	9	10	43.3	9.5	5.4e-17	9	10	40.3	8.5	4e-15	10	11	46.4	8.74	1.4e-15	9	11	39.9	10	6.5e-18	10	11
[1137]		WP_008142830.1	10	14	46.5	9.29	1.3e-16	6	9	34.2	9.67	2.6e-17	7	10	52.2	10.06	5.2e-18	9	11	59.2	8.12	2e-14	8	10	45.2	8.85	8.6e-16	6	8	34.2	7.2	9.9e-13	10	12	60.5	10.49	8.1e-19	8	11	48.2	9.45	6.7e-17	7	10	59.2	10.34	1.5e-18	10	13
[1138]		WP_011090247.1	14	15	40.2	7.79	8.2e-14	12	13	35.9	8.03	2.8e-14	12	14	35.5	9.6	3.6e-17	12	14	34.8	8.99	4.9e-16	13	13	44.9	9.27	1.5e-16	12	13	40	8.32	8.3e-15	10	10	27.7	9.06	3.7e-16	9	10	25.2	10.3	1.8e-18	13	16	44	8.87	8.2e-16	7	8
[1139]		WP_038967810.1	9	12	39.6	9.83	1.4e-17	7	8	33.6	8.2	1.4e-14	11	14	43.8	9.1	3e-16	7	9	31.3	7.5	2.8e-13	7	9	25.3	7.5	2.8e-13	9	12	31.3	8.88	7.9e-16	9	12	39.6	10.61	4.9e-19	9	11	35.5	9.11	3e-16	8	10	39.6	9.67	2.6e-17	7	10
[1140]		WP_038965129.1	4	4	6.2	5.9	1.3e-11	8	8	13.2	6.86	4e-12	8	8	12.6	9.22	1.8e-16	14	14	23.9	8.33	8e-15	5	5	9	4.35	7e-10	10	10	19.8	5.51	1.1e-10	8	8	15.1	5.74	9e-11	10	10	20.6	8.95	5.6e-16	10	10	20.1	8.44	5e-15	9	9
[1141]		WP_011090177.1	10	12	53.9	9.52	5.2e-17	10	13	44	8.48	4.3e-15	9	12	43.2	8.21	1.4e-14	11	14	37.4	8.28	9.9e-15	8	10	46.5	10.42	1.1e-18	8	11	36.6	7.78	8.4e-14	9	11	47.3	9.94	8.3e-18	8	11	30	8.54	3.3e-15	10	13	44	7.86	6e-14	9	11
[1142]		WP_011087575.1	12	17	60.6	8.7	1.7e-15	6	8	25.1	6.02	1.5e-10	8	10	37.8	8.16	1.7e-14	6	7	25.1	6.89	3.7e-12	7	7	31.9	6.23	6.3e-11	9	11	48.6	7.35	5.4e-13	12	15	55.4	8.32	8.4e-15	10	12	48.6	7.13	1.4e-12	10	12	47.4	6.61	6.8e-12	7	9
[1143]		WP_038966136.1	11	11	35.5	7.58	2e-13	10	10	32.1	7.49	2.9e-13	7	8	25.4	7.75	9.6e-14	7	7	27	7.82	7e-14	10	10	38.3	7.59	1.9e-13	13	13	45.6	7.73	1.1e-13	9	9	32.1	8.33	8.1e-15	10	10	35.5	8.32	8.6e-15	12	13	37.5	9.55	4.5e-17	8	8
[1144]		WP_011090156.1	10	16	80.1	10.26	2.1e-18	7	10	43	7.55	2.3e-13	8	11	51	7.78	8.5e-14	5	7	41.7	8.67	1.9e-15	5	6	41.7	9.22	1.8e-16	5	7	46.4	9.9	1e-17	7	11	51	8.33	8.2e-15	6	10	49.7	8.82	1e-15	6	8	49.7	9.04	4e-16	6	7
[1145]		WP_011083450.1	8	12	62.9	9.28	1.4e-16	4	5	27.5	9.34	1.1e-16	8	10	52.8	9.6	3.7e-17	8	9	45	9.05	3.7e-16	9	11	53.7	9.88	1.1e-17	10	12	61.6	9.87	1.1e-17	10	15	63.8	10.2	2.8e-18	8	12	45.9	10.27	2.1e-18	8	14	55.9	10.68	3.5e-19	8	9
[1146]		WP_011090246.1	14	14	37.6	8.45	4.8e-15	14	14	37.6	6.3	4.6e-11	13	13	36.4	6.15	8.6e-11	10	10	27.5	5.85	1.8e-10	12	12	31.7	4.74	3.1e-09	13	13	37.6	10.72	3e-19	12	12	34.6	6.26	5.6e-11	14	14	39.9	8.9	7.2e-16	13	13	37.6	9.36	1e-16	11	11
[1147]		WP_011084253.1	7	7	25.1	7.01	2.2e-12	11	11	33.1	5.96	2.8e-11	11	11	38.6	7.03	2e-12	14	15	35.1	8.62	2.4e-15	6	6	17.5	5.74	1.3e-10	6	6	23.4	7.31	6.3e-13	6	6	23.2	8.31	9e-15	9	9	25.1	4.95	1.2e-09	9	9	34.7	7.07	1.7e-12	7	7
[1148]		WP_011084145.1	13	13	52.8	7.14	1.3e-12	8	8	27	4.58	7.9e-09	12	12	45.7	6.26	1.1e-11	8	8	23	4.96	4.4e-09	9	9	40.4	6.63	1.2e-11	10	10	35.7	6.9	3.6e-12	11	11	36.6	9.24	1.7e-16	11	12	35.7	6.15	8.7e-11	7	7	31.1	8.47	4.4e-15	5	5
[1149]		WP_171463862.1	12	15	42.8	9.27	1.5e-16	6	7	31.7	7.8	7.7e-14	9	10	32.8	6.84	4.6e-12	7	7	37.9	7.56	2.2e-13	5	5	25.2	7.55	2.2e-13	7	8	26.9	6.6	1.3e-11	9	11	32.8	7.51	2.7e-13	11	13	42.8	7.94	4.3e-14	8	10	41.7	7.94	4.2e-14	7	8
[1150]		WP_011089337.1	9	11	30.7	7.76	6.9e-14	9	10	28.2	7.87	5.8e-14	10	10	29.5	6.9	3.6e-12	12	14	30.7	6.99	2.4e-12	12	12	35.2	7.14	1.3e-12	15	16	43.9	7.42	3.9e-13	12	13	36.8	5.73	6e-11	7	7	20.9	6.53	2.6e-12	11	12	34.1	7.29	6.7e-13	10	11
[1151]		WP_011085186.1	14	18	41.6	8.15	1.8e-14	12	15	38.7	8.62	2.3e-15	13	16	34.6	8.19	1.5e-14	9	11	24.4	7.61	1.8e-13	9	10	22.4	7.56	2.2e-13	10	11	33.4	8.62	2.4e-15	13	15	36.9	8.15	1.7e-14	13	14	36.9	8.54	3.3e-15	14	17	43	9.09	3.1e-16	9	9
[1152]		WP_011087825.1	9	12	36.8	11.92	1.9e-21	6	6	36.8	10.58	5.5e-19	7	8	43.6	10.99	9.4e-20	6	7	36.8	9.23	1.7e-16	6	7	36.8	9.99	6.9e-18	8	9	36.8	9.28	1.4e-16	9	11	43.6	9.67	2.7e-17	7	8	36.8	10.31	1.7e-18	8	9	36.8	10.3	1.8e-18	8	9
[1153]		WP_236842276.1	14	15	50.2	7.59	1.9e-13	8	8	26.4	7.56	2.2e-13	15	16	57.6	7.52	2.6e-13	12	12	49.4	7.49	2.9e-13	8	8	36.8	6.42	7.4e-12	9	9	42.9	6.48	2.2e-11	10	11	45	7.42	4e-13	16	17	58.9	8.04	2.8e-14	7	8	43.7	7.42	3.9e-13	8	8
[1154]		WP_038966842.1	10	10	17.4	7.85	6.2e-14	14	15	20.9	6.44	2.5e-11	10	12	15	7.73	1e-13	15	16	23.4	7.64	1.6e-13	13	14	17.8	7.22	9.1e-13	13	15	24.5	7.83	6.9e-14	10	11	14.8	4.96	1.2e-09	11	12	16.6	7.24	8.6e-13	11	13	18.2	7.52	2.5e-13	15	16
[1154-1]	14	WP_162494129.1	3	3	5	5.14	1.1e-09	10	10	17.3	6.92	3.3e-12	9	9	15.8	6.99	2.4e-12	8	8	12.7	5.66	1.7e-10	6	6	12.7	5.21	2.1e-10	9	9	13.8	7.41	2.4e-13	8	8	15.5	6.76	6.6e-12	10	10	17.3	5.47	8.7e-10	8	8	14	5.79	4e-10	9	9
[1154-2]	13	WP_011090098.1	7	7	11	6.08	4.7e-11	8	8	12	6.44	2.5e-11	9	9	14.5	7.73	1e-13	9	9	14.1	5.53	2.8e-10	6	6	9	4.9	7e-10	6	6	9.3	5.64	2.1e-10	5	5	8.1	5.67	1.5e-11	6	6	9.4	6.55	5.6e-12	7	7	10.2	5.73	4.4e-10	8	8
[1154-3, 1507-1]	9	WP_244944544.1	5	5	4.8	3.02	4.9e-08	4	4	3.9	2.93	2.9e-08	5	5	5.1	3.92	4e-08	4	4	4.4	1.64	3.3e-06	3	3	3.2	1.89	2.4e-06	1	1	1	1.18	2.1e-06	3	3	3	0.43	0.00011	4	4	3.8	2.82	2.3e-08	3	3	2.9	3.86	4e-09	2	2
[1155]		WP_011086893.1	10	28	65	9.06	3.6e-16	8	13	43.6	7.35	5.4e-13	7	12	42.1	7.41	4.1e-13	8	12	43.6	7.96	3.9e-14	7	9	40.7	7.23	8.6e-13	9	16	43.6	7.91	4.9e-14	9	20	43.6	7.87	5.7e-14	9	22	43.6	7.62	1.7e-13	9	18	40.7	7.71	1.2e-13	7	10
[1156]		WP_038966719.1	10	10	34.9	7.51	2.6e-13	11	11	39.9	8.53	3.4e-15	14	15	52	11.53	9.4e-21	9	9	33.5	7.37	4.9e-13	4	4	13.4	3.15	9.5e-08	14	14	45.8	11.48	1.2e-20	11	11	39.1	8.96	5.5e-16	10	10	32.4	10.71	3.2e-19	12	12	37.7	10.8	2.1e-19	9	9
[1157]		WP_011087782.1	11	14	37.1	5.85	3.1e-10	10	13	31.2	5.72	5.5e-10	13	18	44.8	7.36	5.1e-13	14	18	42.2	7.41	4e-13	11	14	38.5	8.32	8.4e-15	11	13	39.1	6.66	1e-11	12	15	44.2	7.01	2.2e-12	13	16	44.2	7.54	2.3e-13	10	14	33.7	7	2.3e-12	11	14
[1158]		WP_011085327.1	12	20	38.4	9.3	1.3e-16	8	12	29.1	6.25	5.9e-11	10	16	30.1	6.27	5.2e-11	10	17	38.4	6.27	5.3e-11	10	14	30.8	7.81	7.3e-14	11	17	38.4	8.93	6.1e-16	10	18	38.4	6.45	2.4e-11	11	17	30.8	6.73	7.4e-12	10	16	29.1	9.42	7.8e-17	9	13
[1159]		WP_011088728.1	9	11	15.8	12.44	2e-22	10	11	18.8	11.91	1.9e-21	12	15	20.8	12.26	4.2e-22	8	10	12.4	7.36	5e-13	8	9	10	5.09	1.4e-09	10	12	15.8	10.05	5.2e-18	8	10	13	12.63	8.7e-23	8	10	11	7.09	1.6e-12	8	10	12.7	8.52	3.6e-15	7	9
[1160]		WP_011083572.1	9	11	21.7	7	2.4e-12	12	14	27.5	7.37	4.8e-13	13	14	38.9	7.04	2e-12	12	12	29.8	6.84	4.7e-12	12	13	32	6.79	5.7e-12	13	14	36	8.34	7.7e-15	14	15	35.1	7.27	7.5e-13	13	14	32.7	6.48	2.2e-11	10	11	29.8	7.62	1.7e-13	11	12
[1161]		WP_011082923.1	14	15	50.9	7.7	1.2e-13	7	8	26.8	7.14	1.3e-12	10	10	37.4	6.95	2.9e-12	11	11	44.7	7.14	1.3e-12	5	5	18.5	6.11	2.4e-11	11	11	37.9	6.05	1.3e-10	11	11	42.9	6.7	8.5e-12	13	14	51.2	7.22	9.1e-13	10	11	33.8	7.81	7.3e-14	11	11
[1162]		WP_038967111.1	8	18	29.2	9.62	3.4e-17	6	11	26.2	7.5	2.8e-13	8	19	29.2	9.84	1.3e-17	7	19	26.5	9.1	3e-16	6	10	26.5	7.13	1.3e-12	7	20	26.5	9.8	1.5e-17	7	19	26.5	9.6	3.6e-17	7	18	29.2	7.81	7.3e-14	8	17	29.2	9.59	3.7e-17	6	13
[1163]		WP_028173732.1	9	9	23.2	5.59	9.6e-10	9	10	24.3	9.01	4.5e-16	13	14	30.4	7.12	1.4e-12	15	16	35.1	6.87	4e-12	12	12	28.6	5.72	1.7e-10	9	9	18.9	6.53	1.7e-11	11	11	25.9	6.7	8.5e-12	11	11	22.5	6.68	9.3e-12	13	13	30.9	5.98	1.8e-10	10	10
[1164]		WP_011088704.1	11	11	16.6	5.1	7.9e-09	15	15	24.6	6.7	8.1e-12	15	16	24.6	7.67	1.4e-13	15	15	23.2	7.76	9.3e-14	12	12	17.6	7.28	7e-13	15	15	25.7	8	3.3e-14	12	12	19.8	5.45	1.7e-09	14	14	23.6	5.77	4.4e-10	11	11	16.5	6.84	4.6e-12	10	10
[1165]		WP_038966586.1	8	9	15.9	7.99	3.4e-14	11	12	23	9.69	2.4e-17	9	11	17.7	5.6	9e-10	12	13	22.5	7.11	5.4e-13	11	11	21.3	7.16	2.6e-13	13	14	26.2	6.93	2.9e-12	12	13	20.3	7.97	3.8e-14	14	15	23.4	8.08	2.4e-14	11	12	23.1	7.25	8e-13	12	13
[1166]		WP_011088965.1	12	12	34.6	9.33	1.1e-16	13	13	41.7	10.5	7.7e-19	12	12	34	9.3	1.3e-16	12	12	39.7	7.9	5e-14	12	13	42.3	7.35	5.4e-13	13	14	37.4	8.73	1.5e-15	12	12	37.4	9.99	6.9e-18	14	14	41.7	9.34	1.1e-16	10	10	29.4	7.59	1.9e-13	13	13
[1167]		WP_011087619.1	11	15	51.6	9.06	3.6e-16	10	12	45.8	9.89	1e-17	6	7	42.5	9.3	1.3e-16	9	12	51.6	10.91	1.3e-19	9	11	45.8	10.37	1.3e-18	8	11	51.6	10.17	3.2e-18	10	13	51.6	9.76	1.8e-17	8	11	50.3	9.66	2.8e-17	9	11	50.3	8.27	1e-14	10	11
[1168]		WP_011088387.1	12	16	38.5	7.88	5.4e-14	11	13	28.8	6.03	1.5e-10	12	15	40.6	7.06	1.8e-12	14	16	47.8	10.74	2.8e-19	10	11	30.2	6.39	1.1e-11	13	14	55	8.36	7e-15	13	15	40.3	9.66	2.8e-17	9	11	25.5	6.5	2e-11	15	18	44.2	6.87	4.2e-12	11	13
[1169]		WP_028171332.1	11	14	75.2	10.72	3e-19	4	4	56.4	6.04	2e-11	5	5	40.6	7.47	9.2e-14	4	4	39.6	6.82	2.6e-13	7	7	68.3	5.97	6.7e-11	5	5	40.6	7.26	7.7e-13	9	9	68.3	5.96	1.9e-10	8	8	59.4	8.33	8e-15	9	10	74.3	8.83	9.5e-16	8	9
[1170]		WP_011088468.1	12	16	36.1	10.8	2.2e-19	8	12	30.9	7.1	1.5e-12	9	13	31.8	9.07	3.5e-16	10	13	46.4	6.48	2.2e-11	11	12	36.9	7.75	9.6e-14	13	16	47.2	7.57	2.1e-13	9	13	30.5	11.74	3.9e-21	11	16	36.1	11.1	6e-20	9	12	30.9	7.99	3.5e-14	9	12
[1171]		WP_011088135.1	8	9	14.4	8.96	5.5e-16	7	11	14.4	8.58	2.7e-15	8	10	16.5	8.51	3.8e-15	8	10	16.3	9.56	4.2e-17	9	13	18.7	7.71	1.1e-13	7	8	16.3	9.76	1.8e-17	9	12	18.7	8.36	7.1e-15	11	14	19	9.57	4.1e-17	8	10	18.7	8.37	6.8e-15	8	11
[1172]		WP_011086047.1	11	11	10.1	4.65	5.9e-09	15	15	14.9	6.83	4.8e-12	10	10	9.3	4.16	3.3e-08	17	17	17.2	5.79	2.3e-10	7	7	7.9	3.62	1.3e-08	18	18	19.9	5.9	2.1e-10	16	16	15.7	6.81	5.4e-12	12	12	12.4	4.41	9.3e-10	12	12	12.8	7.44	3.6e-13	15	15
[1173]		WP_011085552.1	13	15	20.7	7.41	4e-13	13	16	19.1	7.68	1.3e-13	11	13	17	7.03	2.1e-12	10	13	17.6	6.57	1.5e-11	11	12	17.2	7.48	3.1e-13	12	15	22.7	7.63	1.6e-13	13	14	29.9	6.32	4.3e-11	13	14	22.5	7.92	4.6e-14	10	12	21.5	7.18	1.1e-12	11	12
[1174]		WP_011085816.1	8	8	12.1	7.01	2.2e-12	12	17	14.7	7.43	3.8e-13	12	15	14.7	7.24	8.3e-13	10	10	13.3	7.15	1.2e-12	12	13	13.7	6.27	5.3e-11	15	16	18.9	6.21	6.7e-11	11	12	13.4	6.77	6.4e-12	12	12	15.6	7.04	2e-12	10	12	13	8.66	2e-15	12	14
[1175]		WP_011088490.1	11	11	35.4	8.59	2.6e-15	12	12	30.2	6.8	5.6e-12	10	10	26.1	5.9	2.5e-10	9	9	24.9	7.14	1.3e-12	9	9	23.6	6.38	7.8e-12	6	6	24.1	7.39	4.5e-13	11	12	37.4	8	3.3e-14	14	14	41.5	7.89	5.2e-14	12	14	38.9	8.61	2.4e-15	10	10
[1176]		WP_011088955.1	13	14	52.3	7.17	1.1e-12	11	12	40.1	6.56	1.5e-11	13	16	45.5	5.54	1.2e-09	11	12	38.2	8.67	1.9e-15	7	7	19	5.16	6e-09	10	10	31.2	6.21	6.9e-11	12	12	40.1	6.18	7.7e-11	11	11	41.2	5.05	9.6e-09	14	16	51.8	6.86	4.2e-12	11	12
[1177]		WP_011087642.1	10	14	38	8.21	1.3e-14	9	12	44.4	6.54	1.7e-11	8	9	32.1	7.6	1.8e-13	10	12	45.7	7.33	5.8e-13	7	9	32.1	7.34	5.6e-13	9	11	38.9	7.37	4.9e-13	10	13	38.9	7.15	1.2e-12	10	11	47	6.95	2.9e-12	12	16	47	7.38	4.6e-13	10	13
[1178]		WP_011089305.1	12	14	32.2	9.92	9.1e-18	10	11	32.2	9.5	5.4e-17	9	10	26.9	9.91	9.7e-18	9	9	26.9	9.35	1.1e-16	10	10	30.3	7.53	4.8e-14	11	12	32.2	9.41	8e-17	11	12	32.2	9.74	2e-17	10	12	32.2	9.81	1.4e-17	9	9	25	9.54	4.6e-17	10	11
[1179]		WP_011088784.1	12	14	45.8	9.08	3.2e-16	9	11	26.2	6.05	1.4e-10	12	14	45.8	9.64	3e-17	9	11	33.1	4.09	3e-08	9	9	31.9	8.4	6e-15	11	13	38.5	4.58	8.4e-09	12	15	51.5	10.21	2.7e-18	10	12	33.8	5.92	7.5e-11	11	14	45.8	8.15	1.7e-14	11	12
[1180]		WP_011087104.1	12	13	42.8	7.06	1.8e-12	13	16	49	9.7	2.3e-17	12	13	46	9.48	5.9e-17	9	9	36.5	10.12	3.8e-18	8	8	30.2	9.12	2.8e-16	13	13	45.5	7.66	1.4e-13	12	13	46	9.23	1.7e-16	12	13	46	9.34	1.1e-16	12	15	45.8	7.82	7.1e-14	12	14
[1181]		WP_038967275.1	6	6	16.9	6.97	2.7e-12	8	8	21.5	6.65	1e-11	9	9	22.3	7.22	9.2e-13	9	9	22.9	7.47	3.2e-13	8	8	20.4	3.19	1.1e-07	10	10	29.6	6.56	1.6e-11	7	7	17.7	6.37	1.8e-11	6	6	15	6.79	5.7e-12	8	8	19	8.2	1.4e-14	11	11
[1182]		WP_011083469.1	11	16	51.1	8	3.3e-14	7	8	37	8.36	7.1e-15	8	10	34.5	7.04	2e-12	6	6	26.8	8.28	9.9e-15	6	7	26.8	7.28	7.2e-13	8	10	34.9	6.69	8.9e-12	9	12	43.4	8.81	1e-15	9	11	45.5	6.6	1.3e-11	8	9	35.3	6.8	5.5e-12	8	9
[1183]		WP_038967074.1	14	19	54.9	6.79	5.7e-12	10	13	40.6	8.67	1.9e-15	7	11	40.9	8.9	7e-16	12	14	44.1	8.71	1.6e-15	9	9	33.9	6.84	4.7e-12	11	15	54.9	6.91	3.4e-12	11	16	40.6	7.4	4.2e-13	11	13	53.8	6.28	2.8e-11	9	13	36	7.33	5.6e-13	13	15
[1184]		WP_011090548.1	12	16	58.2	8.8	1.1e-15	10	12	43.9	7.61	1.8e-13	13	15	58.2	7.17	1.2e-12	9	11	35.9	7.12	1.4e-12	8	8	27.8	7.28	7e-13	9	11	35	7.76	9.1e-14	8	10	35.4	6.96	2.8e-12	6	7	34.6	7.83	6.8e-14	10	13	51.1	8.21	1.4e-14	10	13
[1185]		WP_038966498.1	7	8	18.8	7.41	4e-13	8	9	21.2	8.79	1.2e-15	11	12	42.9	9.89	1.1e-17	8	9	21.2	7.4	4.3e-13	4	4	12.2	7.49	3e-13	3	3	9.3	7.4	4.3e-13	7	7	18.5	6.99	2.4e-12	7	7	21	6.9	3.6e-12	11	12	38.8	8.73	1.5e-15	9	10
[1186]		WP_011087406.1	15	16	25.7	9.1	1.1e-16	16	19	32.5	12.02	1.2e-21	14	15	32.7	10.88	1.6e-19	14	15	31.4	8.69	1.4e-16	9	11	21.6	5.17	2e-10	11	12	21.6	9.96	6.2e-18	11	12	21.3	8.96	5.4e-16	12	13	20.9	9.92	9e-18	11	12	22.7	12.61	9.7e-23	11	12
[1187]		WP_038967564.1	7	7	26.9	7.2	1e-12	8	8	20	7.22	9.4e-13	11	11	34.5	7.02	2.2e-12	10	10	36.9	7.35	5.2e-13	3	3	7.1	3.54	1.6e-08	8	8	22.4	5.37	1e-09	7	7	20.5	6.44	2.6e-11	8	8	30.5	6.52	1.8e-11	12	12	34.8	7.94	4.3e-14	11	11
[1188]		WP_038965333.1	11	13	45.1	9.07	3.5e-16	6	6	25.4	8.32	8.3e-15	8	9	34.6	9.18	2.1e-16	7	8	34.6	8.06	2.6e-14	7	7	30.2	4.24	1.6e-08	6	6	25.4	7.33	5.7e-13	4	5	21.6	6.83	4.8e-12	5	6	21.6	6.31	4.5e-11	9	10	41	8.85	8.9e-16	7	8
[1189]		WP_011087674.1	8	10	17	10.15	3.4e-18	8	11	17	9.18	2.2e-16	8	11	17	9.06	3.6e-16	8	10	17	11.27	2.9e-20	6	6	17	9.39	8.9e-17	9	12	17	9.92	9.1e-18	8	12	17	9.65	2.9e-17	9	12	17	9.92	9.3e-18	7	12	17	8.72	1.5e-15	9	11
[1190]		WP_011087288.1	14	14	48	6.53	1.7e-11	12	12	39.9	6.87	4.1e-12	11	12	30.2	5.87	2.9e-10	7	7	27	5.27	4.9e-10	10	10	33	5.44	4.1e-10	7	7	23.3	6.67	9.7e-12	10	10	36.5	6.8	5.6e-12	12	12	45.7	6.57	1.5e-11	11	11	40.2	7.01	2.2e-12	8	8
[1191]		WP_011085281.1	13	16	47.3	7.99	3.4e-14	2	2	10.8	3.96	5.7e-09	4	4	30.6	5.38	2.7e-10	3	3	15.1	3.92	2.8e-08	7	7	29	4.41	3e-09	9	9	46.8	6.55	1.6e-11	10	11	43	5.51	1.7e-10	9	11	43	7.53	2.4e-13	3	3	12.4	3.02	1.2e-07	2	2
[1192]		WP_011089907.1	10	11	38.9	8.68	1.8e-15	9	10	38.3	9.33	1.1e-16	9	10	38	9.48	5.9e-17	8	8	31.8	8.84	9.4e-16	11	11	46.1	9.25	1.6e-16	11	12	41.1	8.77	1.2e-15	11	11	41.7	8.67	1.9e-15	8	9	30.8	8.66	2e-15	10	11	45.8	8.68	1.8e-15	8	8
[1193]		WP_011084984.1	10	15	30.7	6.82	5.1e-12	10	13	30.5	7.37	4.8e-13	12	19	29	6.82	5.1e-12	11	14	32.7	7.18	1.1e-12	10	12	32	6.08	5.6e-11	10	15	32.7	6.99	2.4e-12	10	14	30.7	7.47	3.1e-13	11	18	27.5	6.81	5.2e-12	9	14	27	9.01	4.4e-16	11	13
[1194]		WP_038965642.1	13	15	24.7	7.43	3.7e-13	10	11	20.2	8.34	7.7e-15	12	12	24.4	7.33	5.8e-13	10	12	20.2	6.75	6.7e-12	7	8	16.3	7.41	4.1e-13	7	8	16.6	8.23	1.2e-14	10	11	18	5.18	5.5e-09	13	14	24.9	7.43	3.8e-13	13	16	25	8.47	4.4e-15	11	12
[1195]		WP_038967556.1	9	9	53	8.53	3.4e-15	4	5	25.2	9.74	2e-17	11	12	55.7	8.88	7.6e-16	7	8	45.2	8.52	3.5e-15	6	7	43	7.54	2.4e-13	8	11	44.8	8.02	3e-14	6	7	43	9.79	1.6e-17	8	10	43.9	9.24	1.6e-16	6	9	32.6	8.86	8.4e-16	8	10
[1196]		WP_011087202.1	12	18	31.2	7.19	1.1e-12	10	13	28.5	6.77	6.3e-12	12	16	26.8	7.04	2e-12	13	19	37.6	6.84	4.5e-12	10	12	26.2	6.46	2.3e-11	13	16	37.6	7.3	6.6e-13	10	14	31.2	6.85	4.4e-12	10	15	24.4	6.45	2.4e-11	10	14	24.4	6.4	3e-11	13	17
[1197]		WP_011084387.1	12	14	21.4	9.28	1.4e-16	12	14	22.4	5.99	1.8e-10	8	10	15.7	6.84	4.7e-12	9	11	20.6	8.36	7.1e-15	6	6	11.1	2.28	2.3e-07	9	9	14.2	7.37	4.9e-13	9	10	12.9	7.51	2.7e-13	11	12	20.1	9.32	1.2e-16	11	14	20.6	8.83	9.7e-16	10	12
[1198]		WP_011088413.1	12	15	37.5	7.84	6.5e-14	10	12	29.5	6.73	7.4e-12	10	12	25.3	7.57	2.1e-13	10	10	27.9	7.96	3.9e-14	8	8	21.7	6.91	3.5e-12	9	10	27.1	6.67	9.5e-12	11	14	34.4	8.5	3.9e-15	10	14	31.5	7.41	4e-13	10	10	31.3	7.57	2.1e-13	10	11
[1199]		WP_011088174.1	11	14	42.9	9.74	1.9e-17	12	15	43.6	9.22	1.8e-16	11	14	37.9	9.59	3.7e-17	10	13	38.3	9.47	6.2e-17	7	10	30.9	8.87	8e-16	11	15	42.9	9.1	3.1e-16	12	15	42.2	8.31	8.8e-15	11	14	42.2	8.04	2.7e-14	9	12	31.2	7.87	5.6e-14	9	13
[1200]		WP_011089191.1	10	12	35.8	7.52	2.6e-13	9	11	26.8	6.56	1.5e-11	9	10	32.5	6.77	6.1e-12	12	12	41.3	6.57	1.5e-11	12	14	41.8	6.63	1.2e-11	13	17	44.5	7.64	1.5e-13	12	15	37.7	7.78	8.5e-14	10	12	35	8.7	1.6e-15	9	10	30.9	6.65	1e-11	12	14
[1201]		WP_011083946.1	10	25	72.4	9.66	2.7e-17	4	6	54.3	6.78	5.9e-12	7	12	70.7	9.7	2.3e-17	7	8	63.8	9.71	2.2e-17	3	3	26.7	8.07	2.5e-14	6	8	63.8	9.38	9.1e-17	8	13	70.7	8.73	1.5e-15	8	11	70.7	7.33	5.8e-13	8	16	88.8	9.44	7.2e-17	7	12
[1202]		WP_011090009.1	11	13	39.9	7.63	1.6e-13	9	11	31.2	6.45	2.4e-11	9	9	36.8	6.47	2.2e-11	9	9	35.8	7.72	1.1e-13	10	10	38.9	6.07	8.3e-11	13	15	40.3	8.31	9e-15	9	11	36.8	7.41	4.1e-13	11	13	38.5	7.49	3e-13	10	11	36.8	7.43	3.7e-13	10	11
[1203]		WP_011086985.1	13	16	50.6	7.29	6.7e-13	12	15	43.9	7.52	2.6e-13	11	14	36.5	7.42	3.9e-13	5	5	26.2	7.69	1.2e-13	10	10	47.6	7.18	1.1e-12	6	7	28.4	5.2	1.5e-09	8	9	32.1	7.26	7.8e-13	8	9	32.1	5.85	1.3e-10	13	15	49.1	7.39	4.4e-13	11	14
[1204]		WP_011089551.1	8	8	18.8	7.26	7.7e-13	12	13	27.1	7.32	6.1e-13	11	11	31.4	8.18	1.6e-14	9	9	20.9	7.48	3.1e-13	5	5	14.3	5.85	1.6e-11	9	9	23.8	7.83	6.8e-14	13	14	34.2	7.79	7.9e-14	13	13	32.8	7.96	3.9e-14	11	11	26.4	6.72	7.7e-12	10	11
[1205]		WP_028173806.1	8	10	19.5	6.8	5.6e-12	8	9	20.1	6.99	2.5e-12	12	16	33.2	8.2	1.4e-14	9	10	24.5	7.3	6.6e-13	6	6	16.7	5.43	1.3e-09	5	5	13.5	6.76	6.6e-12	5	5	15.3	5.42	2e-09	5	5	11.7	5.14	6.6e-09	12	14	33.4	8.35	7.5e-15	10	11
[1206]		WP_028170879.1	12	14	59.1	7.71	1.1e-13	8	10	44.2	6.27	5.4e-11	12	16	66.8	6.76	6.6e-12	13	15	66.8	7.1	1.5e-12	8	9	36.5	6.59	3.3e-12	11	13	57.7	6.41	2.8e-11	9	12	44.2	6.06	8.1e-11	9	11	41.8	6.73	2.5e-12	9	12	50	7.42	4e-13	8	10
[1207]		WP_011089986.1	11	12	34.1	9.18	2.1e-16	9	9	28.4	10.15	3.5e-18	7	8	25.8	8.66	2e-15	7	8	28.4	6.72	6.4e-12	6	6	22	5.77	1.6e-11	9	10	34.1	7.04	2e-12	10	10	34.1	7.25	8.1e-13	9	10	34.1	7.39	4.5e-13	9	10	28.4	9.63	3.2e-17	8	8
[1208]		WP_038965432.1	11	11	17.5	8.28	1e-14	14	14	21.6	7.03	2.1e-12	11	11	23.9	7.31	6.2e-13	14	14	22	6.89	3.8e-12	8	8	13.2	6.55	1.6e-11	15	15	26.5	5.58	3e-11	13	13	23.3	6.94	7.8e-13	14	15	25.6	6.42	2.7e-11	11	11	18.8	7.99	3.5e-14	8	8
[1209]		WP_236842136.1	12	16	47.2	8.6	2.6e-15	6	6	28.6	6.62	1.2e-11	8	9	34.7	8.98	5e-16	4	4	19	6.17	8.1e-11	8	9	29	8.38	6.5e-15	11	12	41.5	8.62	2.3e-15	10	13	34.3	9.22	1.8e-16	7	7	27	8.13	1.9e-14	6	6	34.3	7.66	1.4e-13	6	6
[1210]		WP_011090157.1	11	15	39.9	7.32	5.9e-13	8	9	27.8	6.93	3.2e-12	9	12	29.7	7.13	1.4e-12	9	11	31.9	6.84	4.7e-12	8	10	35.8	6.5	1.9e-11	11	15	42.8	7.05	1.9e-12	8	11	31.9	7.03	2.1e-12	10	14	38.7	7.47	3.2e-13	10	14	32.6	6.72	7.8e-12	8	10
[1211]		WP_232675542.1	10	13	72.1	9.34	1.1e-16	8	10	47.1	6.36	3.6e-11	6	7	46.4	6.4	3e-11	8	9	72.1	7.16	1.2e-12	8	9	47.1	6.53	1.7e-11	9	10	47.1	8.59	2.7e-15	6	6	40	7	2.3e-12	8	9	46.4	10.01	6.2e-18	10	11	72.1	9.91	9.4e-18	6	6
[1212]		WP_011087060.1	11	12	35.8	8.53	3.4e-15	8	9	24.5	9.07	3.5e-16	7	8	21	8.17	1.6e-14	8	10	25.9	5.44	5.4e-10	7	7	21.8	4.48	1.7e-10	8	9	25.6	4.79	2.4e-09	7	8	24	8.53	3.5e-15	4	6	16.2	5.58	8e-11	13	15	42.3	8.74	1.4e-15	10	12
[1213]		WP_133415010.1	9	9	10.3	5.95	1e-11	13	13	14.5	6.64	1.1e-11	12	12	14.3	8.71	1.6e-15	15	15	16.7	6.64	1.1e-11	7	7	7.2	4.05	6.6e-09	8	8	7.7	4.75	1e-09	11	11	12.9	6.57	1.5e-11	6	6	6.7	7.24	8.5e-13	15	15	17.1	6.7	8.5e-12	18	18
[1214]		WP_011084999.1	14	14	28.7	7.86	5.9e-14	13	14	27	7.24	8.3e-13	10	12	21.9	8.58	2.8e-15	12	12	26.8	6.4	9.8e-12	4	5	8.4	4.29	2e-09	12	14	23.6	8.32	8.4e-15	12	13	29.7	8.43	5.3e-15	13	14	31.9	8.46	4.6e-15	13	14	31.4	8.79	1.1e-15	12	14
[1215]		WP_038965144.1	11	12	60.1	7.75	9.5e-14	10	14	47.2	6.8	5.6e-12	9	10	45	8.48	4.2e-15	10	10	38.7	7.95	4.1e-14	9	9	41.3	7.17	5.9e-13	9	10	37.6	8.2	1.4e-14	12	15	54.2	8.17	1.6e-14	10	12	36.5	7.65	1.5e-13	9	11	43.2	7.75	9.7e-14	8	10
[1216]		WP_028175706.1	12	13	45.1	5.96	1.1e-10	11	12	42.3	5.42	3e-10	10	11	46.1	7.25	8.1e-13	8	8	30	5.28	3.6e-09	4	4	14.7	2.12	6.6e-07	7	7	24.9	4.06	3.3e-09	10	11	33.1	5.5	2.6e-10	8	8	30.7	5.3	8.6e-10	13	13	62.5	7.18	1.1e-12	11	13
[1217]		WP_011083878.1	9	12	34.3	8.49	4.1e-15	10	12	37.8	7.71	1.1e-13	10	12	39.4	9.86	1.2e-17	9	12	37.5	9.44	7.1e-17	4	5	16.8	6.08	7.5e-12	6	8	25.8	8.19	1.5e-14	6	7	22.1	7.21	9.5e-13	5	7	18.6	7.21	9.6e-13	11	13	41.5	8.22	1.3e-14	8	10
[1218]		WP_011083617.1	9	9	28	8.98	5.2e-16	8	9	29.2	7.71	1.1e-13	9	11	31.2	8.49	4.1e-15	8	8	25.6	7.44	3.6e-13	6	6	25.4	7	2.3e-12	10	10	28.4	9.25	1.6e-16	11	13	42.2	8.33	8e-15	9	10	32.5	6.64	1.1e-11	9	11	26	8.92	6.6e-16	4	4
[1219]		WP_011084323.1	10	14	80	8.05	2.6e-14	5	5	58.7	7.51	2.7e-13	5	5	66.7	6.92	3.4e-12	6	6	85.3	6.36	1.8e-11	2	2	20	7.1	6.3e-13	4	4	69.3	6.32	4.3e-11	7	8	76	6.92	3.2e-12	6	6	76	7.63	1.6e-13	5	5	69.3	7.47	3.2e-13	4	4
[1220]		WP_011083981.1	10	12	36.3	8.35	7.3e-15	6	6	25	7.32	5.9e-13	5	5	32.4	8.6	2.5e-15	9	9	35.3	7.65	1.5e-13	6	6	27.9	4.41	9.2e-10	9	9	35.3	9.17	2.2e-16	6	6	27.9	7.5	2.8e-13	8	8	35.3	8.64	2.2e-15	10	10	40.2	7.62	1.6e-13	8	8
[1221]		WP_038966315.1	12	14	47.8	8.18	1.6e-14	8	9	39.1	6.57	1.5e-11	8	10	37.2	6.45	2.5e-11	7	8	41.2	6.5	2e-11	6	7	27.7	7.39	4.4e-13	7	9	32.8	8.56	3.1e-15	13	14	54	8.8	1.1e-15	10	12	45.6	7.96	4e-14	9	10	52.2	7.01	2.3e-12	7	8
[1222]		WP_011089261.1	11	15	80.7	8.48	4.3e-15	3	3	24.1	7.14	1.3e-12	7	7	56.6	7.55	2.2e-13	4	4	36.1	6.38	7.1e-12	4	4	36.1	4.14	7.7e-09	3	3	24.1	5.46	5.5e-10	4	4	36.1	6.99	2.5e-12	7	7	54.2	7.54	2.3e-13	4	4	36.1	7.75	9.7e-14	5	5
[1223]		WP_011086240.1	12	12	18	4.48	5.4e-09	17	18	26.1	6.55	1.6e-11	16	16	21.4	6.86	4.3e-12	15	15	24	5.72	5.4e-10	7	7	10	4.36	4.5e-09	10	10	16.8	6.24	1.1e-11	12	12	18.9	7	2.3e-12	11	11	17.2	6.1	1.2e-11	12	12	21.2	6.75	6.9e-12	12	12
[1224]		WP_011083939.1	10	10	28.2	6.92	3.3e-12	10	11	30.5	7.92	4.7e-14	11	12	34.5	9.65	2.9e-17	8	8	20.5	5.81	3.7e-10	3	3	8	4.1	7.6e-10	5	5	18.2	5.13	1.4e-09	10	10	26.4	6.13	9.4e-11	8	8	25.9	4.78	3.3e-09	11	13	33.2	6.85	4.5e-12	10	11
[1225]		WP_011083873.1	11	11	21.3	6.29	4.9e-11	14	14	26.8	6.47	2.2e-11	12	13	18.9	5.21	4.9e-09	11	11	18.6	6.15	8.4e-11	4	4	6.9	4.32	7.2e-10	5	5	8.8	4.64	1e-08	9	9	16.1	5.97	1.9e-10	9	9	15.9	5.57	1e-09	14	14	25.5	5.65	7.6e-10	10	10
[1226]		WP_028175407.1	12	15	48.5	8.41	5.7e-15	10	12	44.9	9.04	3.8e-16	11	12	48.5	6.81	5.3e-12	12	13	48.5	7.39	4.4e-13	12	13	55.8	8.53	3.4e-15	11	12	48.5	7.96	3.9e-14	12	14	48.5	7.59	1.9e-13	12	15	53.6	7.93	4.4e-14	9	10	43.1	7.98	3.7e-14	10	12
[1227]		WP_011087701.1	10	15	39.7	9.71	2.2e-17	10	15	30.5	8.35	7.3e-15	10	18	28.6	8.55	3.1e-15	11	14	30.8	7.99	3.5e-14	8	11	32	9.34	1.1e-16	10	14	30.5	8.78	1.2e-15	11	18	35.7	8.11	2e-14	10	14	29.2	8.15	1.8e-14	11	19	32.6	8.04	2.8e-14	11	15
[1228]		WP_011086431.1	9	11	31.6	7.06	1.8e-12	9	11	27.6	6.9	3.5e-12	10	14	34.5	6.7	8.4e-12	12	14	42.9	7.63	1.6e-13	11	11	37.6	5.94	1.5e-10	13	16	47.9	7.38	4.6e-13	9	11	31.6	6.51	1.9e-11	10	13	35.5	6.98	2.5e-12	10	12	33.7	7.04	1.9e-12	10	11
[1229]		WP_011083795.1	10	10	15.3	8.51	3.8e-15	13	13	19.5	8.55	3.1e-15	15	15	22.6	7.7	1.2e-13	15	15	23.4	5.61	9e-10	6	6	9.3	1.92	5.2e-07	14	14	20.6	6.96	2.8e-12	8	8	10.8	7.88	5.6e-14	12	12	18.5	6.66	9.9e-12	14	14	21.9	7.26	7.7e-13	13	13
[1230]		WP_011084350.1	9	14	27	11.46	1.3e-20	8	9	27	11.47	1.2e-20	9	12	29.8	10.27	2.1e-18	6	8	20.6	8.93	6.3e-16	3	4	17.3	5.44	1.1e-11	8	11	27	11.46	1.3e-20	6	7	23.8	9.76	1.8e-17	8	10	27	10.94	1.2e-19	8	12	21.8	10.38	1.3e-18	7	8
[1231]		WP_011090828.1	10	12	41	8.37	6.9e-15	8	10	32.7	7.65	1.5e-13	6	7	17.5	7.63	1.6e-13	9	11	47.4	7.61	1.7e-13	6	7	17.5	9.11	2.9e-16	11	14	56.4	10.32	1.7e-18	9	11	41	8.07	2.4e-14	6	8	17.5	8.28	9.8e-15	8	10	33	9.88	1.1e-17	8	11
[1232]		WP_011087620.1	11	14	43.1	7.91	4.8e-14	7	10	31	8.06	2.6e-14	9	14	36.6	7.35	5.2e-13	9	10	34.4	8.94	6e-16	7	8	34.6	8.2	1.4e-14	12	15	52.4	8.52	3.6e-15	10	14	37.5	7.42	3.9e-13	8	10	38.3	7.4	4.3e-13	8	11	37.5	7.87	5.7e-14	10	14
[1233]		WP_011085583.1	8	11	34.1	7.63	2.7e-14	10	12	40.7	13.1	1.2e-23	8	10	34.1	10.03	5.7e-18	11	13	48.5	11.71	4.4e-21	7	8	35.7	4.04	6.1e-09	9	10	35.7	6.62	1.7e-12	7	8	35.7	12.5	1.5e-22	9	11	35.7	9.61	3.4e-17	8	9	30.5	9.1	3.1e-16	11	14
[1234]		WP_011083717.1	9	13	28.7	7.39	4.5e-13	10	13	30.4	8.15	1.8e-14	11	13	36.7	8.12	2e-14	10	11	27.5	7.19	1e-12	4	4	11.2	6.22	6.5e-11	5	6	18	6.04	1.3e-10	4	5	11.7	6.46	2.4e-11	5	5	16.5	6.53	1.7e-11	11	14	41.1	9.23	1.7e-16	10	13
[1235]		WP_011088983.1	12	13	37.1	6.34	1.5e-11	13	15	39.6	8.94	6.1e-16	10	10	31.4	6.75	4.7e-12	13	14	37.6	8.79	1.1e-15	10	10	33.4	6.21	2.6e-11	12	13	37.9	9.34	1.1e-16	12	12	37.4	5.95	9.9e-11	11	12	31.2	6.99	2.4e-12	10	11	31.9	8.09	2.3e-14	8	8
[1236]		WP_011088262.1	9	9	23.5	7.17	1.1e-12	10	11	28.3	7.79	8e-14	10	10	24.2	7.8	7.8e-14	9	9	21.2	6.48	2.2e-11	5	5	11.3	4.09	1.8e-08	7	7	18.8	6.87	2.2e-12	10	10	23.7	7.8	7.8e-14	10	10	26	5.07	1.6e-09	13	14	31.2	7.44	3.5e-13	12	12
[1237]		WP_011087647.1	11	12	63	11.24	3.3e-20	5	5	41.6	4.27	5e-08	4	4	38.2	6.07	1.8e-11	5	5	42.8	6.03	1e-10	2	2	17.9	0.94	1.1e-05	4	4	29.5	5.28	1.3e-10	8	8	60.7	5.88	2.8e-10	7	8	50.9	5.76	8.9e-11	11	13	63	12.75	5.2e-23	10	10
[1238]		WP_011088369.1	11	11	17.1	6.41	2.9e-11	13	13	19.5	6.07	1.2e-10	15	16	25	6.14	9.3e-11	13	13	18.9	6.03	1.5e-10	6	6	9.7	4.2	2e-09	10	10	14.4	5.69	1.1e-10	11	11	15.7	5.91	2.4e-10	8	8	12	5.11	5.6e-09	9	9	14.3	5.91	2.5e-10	11	11
[1239]		WP_028173807.1	11	14	60.9	7.73	1e-13	6	8	27.8	7.58	1.9e-13	8	9	46.6	6.92	3.3e-12	8	10	44	10.99	9.8e-20	1	1	4.9	0.31	2.8e-05	1	1	4.9	7.06	1.8e-12	1	1	6.4	2.35	1.2e-06	2	2	12	4.94	1.5e-09	11	14	53.8	7.75	9.5e-14	10	12
[1240]		WP_011090028.1	10	11	23.4	7.17	1.1e-12	12	13	28.4	9.16	2.3e-16	10	10	22.7	7.81	7.5e-14	8	8	18	7.35	5.2e-13	5	5	10.6	6.58	1.4e-11	8	8	20.9	8.58	2.8e-15	8	8	18	6.29	4.9e-11	9	10	17.3	6.88	4e-12	10	11	22.7	7.89	5.3e-14	8	9
[1241]		WP_011090324.1	10	10	43.2	7.75	9.4e-14	10	10	46.9	8.14	1.8e-14	10	10	37	7.64	1.5e-13	9	9	49	6.04	1.4e-10	7	7	32.9	6.27	7.8e-12	11	11	42.4	8.49	4e-15	11	11	50.6	7.41	4e-13	12	12	49.4	7.25	8.1e-13	11	11	46.1	8.98	5.1e-16	8	8
[1242]		WP_011087893.1	13	17	88.7	6.87	4.1e-12	4	4	31.7	5.13	9.3e-10	6	6	44.4	7.26	7.8e-13	4	5	31.7	6	1.7e-10	3	4	24.6	7.5	2.8e-13	6	6	59.9	5.77	4.5e-10	6	7	47.2	7.86	5.9e-14	4	4	28.2	3.28	1.2e-07	6	7	40.1	7.98	3.5e-14	4	5
[1243]		WP_038967057.1	12	12	43.8	6.76	6.6e-12	11	11	39.7	8.56	3e-15	10	11	34.8	6.78	6e-12	12	13	45.8	6.4	3.1e-11	11	11	43.8	7.07	1.7e-12	11	12	44.3	6.05	1.3e-10	10	11	39.1	8.61	2.5e-15	9	10	35.4	7.86	6.1e-14	6	8	20.3	8.57	2.9e-15	10	11
[1244]		WP_038967075.1	13	14	63.7	6.78	5.9e-12	8	9	28.4	5	1.2e-08	9	10	33.2	6.04	1.4e-10	8	8	31.2	7.05	1.8e-12	8	8	29.5	6.46	9.3e-12	7	7	26	6.49	2e-11	8	9	28.4	5.69	6.4e-10	9	10	39.4	4.53	3.4e-08	11	12	39	8.39	6.3e-15	10	10
[1245]		WP_011090525.1	10	10	34.9	11.17	4.5e-20	9	10	35.7	10.45	9.4e-19	10	12	29.6	10.34	1.5e-18	9	10	25.3	6.38	1.3e-11	5	5	13.6	3.45	2.1e-07	9	9	23.7	5.48	1.6e-09	8	8	26.9	6.73	5.9e-12	7	7	20.8	6.62	1.2e-11	8	8	27.5	8.44	4.5e-15	8	8
[1246]		WP_028175067.1	10	15	68.1	11.69	4.8e-21	4	4	31.4	7.98	3.6e-14	9	12	60.4	10.63	4.4e-19	8	9	52.7	7.95	4.1e-14	5	5	28	7.15	1.2e-12	9	13	49.8	8.68	1.8e-15	7	10	49.8	9.06	3.7e-16	9	12	52.7	9.66	2.8e-17	8	10	49.8	11.65	5.8e-21	6	7
[1247]		WP_011088737.1	12	14	45.1	7.29	6.9e-13	8	8	31.8	7.22	9.2e-13	8	8	33	6.9	3.6e-12	7	7	28.3	7.41	4.1e-13	6	6	19.7	5.45	4.4e-10	9	9	39.1	7.35	5.3e-13	10	10	31.8	6.91	3.5e-12	8	8	31.8	7.08	1.7e-12	7	7	31.8	6.98	2.5e-12	6	6
[1248]		WP_028175425.1	10	14	62.9	7.56	2.2e-13	10	12	59.4	7.53	2.4e-13	9	12	61.1	7.54	2.4e-13	10	11	61.1	6.99	2.5e-12	8	9	52	7.26	7.7e-13	11	15	61.1	8.83	9.6e-16	12	13	62.9	6.85	4.5e-12	10	12	61.1	7.67	1.4e-13	7	9	50.3	6.93	3.1e-12	8	10
[1249]		WP_011088799.1	9	9	41.8	8.8	1.1e-15	7	7	25.1	7.9	5.1e-14	5	6	23.8	6.32	4.2e-11	8	8	36.2	10	6.6e-18	2	2	9.3	7.77	9e-14	5	5	15.5	6.57	1.5e-11	6	6	25.1	6.9	3.6e-12	6	6	26.3	6.02	1.5e-10	10	11	39.6	11.87	2.2e-21	8	8
[1250]		WP_028173863.1	10	13	66	9.05	3.8e-16	7	8	38.5	6.67	9.4e-12	6	9	38.5	8.24	1.2e-14	7	8	38.5	6.81	5.2e-12	7	7	38.5	7.57	2e-13	9	11	53.2	7.28	7.2e-13	10	11	53.2	6.68	9.1e-12	8	11	53.2	7.02	2.2e-12	8	10	44.9	8.34	7.8e-15	9	11
[1251]		WP_028174448.1	9	9	26.2	6.34	4e-11	10	10	29.8	7.36	5.1e-13	10	10	25	7.81	7.5e-14	11	11	29.8	7.08	1.6e-12	5	5	16.2	4.58	2.1e-09	8	8	24.5	7.32	6e-13	8	8	19.5	6.24	6.1e-11	8	8	22.9	6.34	3.9e-11	10	12	26.7	6.73	7.5e-12	9	9
[1252]		WP_038967201.1	11	12	33.8	7.48	3e-13	12	13	46.1	6.98	2.5e-12	11	13	33.6	6.2	7e-11	10	11	32.2	5.68	2.2e-10	7	7	22.2	4.01	2e-09	12	13	30.8	6.36	3.6e-11	11	13	33.8	6.67	9.7e-12	12	13	34	7.62	1.7e-13	12	13	39.6	7.03	2.1e-12	13	14
[1253]		WP_011086053.1	9	10	32.3	7.9	5e-14	13	14	40.2	7.21	9.7e-13	8	10	26.2	8.43	5.3e-15	8	9	27.5	5.81	2.6e-11	7	7	26	5.61	7.1e-11	11	12	42.7	7.49	2.8e-13	12	14	38.2	8.79	1.1e-15	11	14	37.7	8.44	4.9e-15	8	9	29.8	8	3.3e-14	10	10
[1254]		WP_038967248.1	10	12	51.3	10.14	3.6e-18	10	12	51.3	10.31	1.7e-18	12	13	64.9	10.88	1.5e-19	10	12	50.6	7.94	4.3e-14	10	11	45.7	6.58	1.4e-11	11	13	53.2	7.76	9.3e-14	11	13	53.2	8.3	9.4e-15	10	12	49.8	8.29	9.5e-15	11	13	58.1	9.44	7e-17	12	14
[1255]		WP_011088730.1	8	8	33	6.99	2.4e-12	9	9	35.1	6.66	9.8e-12	10	11	40.4	6.94	3.1e-12	8	8	30.7	6.55	1.6e-11	8	8	26.8	7.05	1.9e-12	9	9	40.7	8.31	8.6e-15	10	10	42.8	7.03	2.1e-12	10	11	34.5	7.2	9.9e-13	11	11	41	6.59	1.4e-11	9	9
[1256]		WP_011087228.1	9	9	28.9	7.04	1.9e-12	8	8	20.8	6.84	4.6e-12	8	8	28.2	8.73	1.5e-15	9	9	31	7.14	1.3e-12	7	7	23.6	6.15	1.3e-11	8	8	28.2	6.91	3.4e-12	8	8	26.5	7.64	1.5e-13	8	8	26.7	8.22	1.3e-14	8	8	24.7	8.38	6.6e-15	8	8
[1257]		WP_011084232.1	13	16	63.2	6.66	9.9e-12	10	12	50.7	6.79	5.9e-12	8	12	39.7	6.42	2.8e-11	8	9	48.3	5.05	2.3e-09	8	8	38.8	7.67	1.3e-13	11	13	47.8	6.99	2.4e-12	12	14	54.1	6.88	3.9e-12	10	12	48.8	7.49	2.9e-13	9	11	43.5	7.18	1.1e-12	6	9
[1258]		WP_028173242.1	8	8	31.9	4.16	5.4e-08	9	9	39.2	6.33	4e-11	9	9	36.9	6.96	2.8e-12	5	5	25.4	8.95	5.6e-16	6	6	32.7	7.65	1.5e-13	7	7	38.5	7.88	5.5e-14	7	7	37.3	7.64	1.5e-13	10	10	43.8	6.28	4.9e-11	7	7	29.6	6.36	2.8e-11	9	9
[1259]		WP_011083446.1	10	11	40.2	4.12	1.3e-08	13	14	48.7	7.16	1.1e-12	10	10	35.8	4	3.9e-08	9	9	36.9	6.74	8.3e-13	9	10	32.1	5.29	2.7e-11	12	13	46.9	7.49	2.3e-13	13	14	48.7	7.15	1.2e-12	12	13	53.9	3.86	5.6e-09	12	13	44.3	5.73	2.3e-11	10	11
[1260]		WP_028172441.1	7	7	23	6.4	3e-11	6	6	21	6.99	2.5e-12	9	9	26.5	6.81	5.3e-12	7	7	24.3	6.92	3.3e-12	11	11	38.4	7.68	1.3e-13	11	11	35.6	7.95	4.1e-14	9	10	27.5	7.19	1e-12	12	13	38.9	7.34	5.6e-13	7	7	23	6.84	4.7e-12	5	5
[1261]		WP_038967024.1	11	11	36	6.34	4e-11	9	9	31.7	7.25	8.1e-13	7	7	25.5	6.73	7.5e-12	7	7	21.8	7.83	6.8e-14	10	10	34.3	5.34	8e-11	11	11	36	7.01	2.3e-12	13	14	39.9	7.76	9.3e-14	12	12	36	6.86	4.3e-12	10	11	34.3	7.31	6.2e-13	7	7
[1262]		WP_011090130.1	10	12	68.8	8.68	1.8e-15	2	2	9.7	1.59	2.7e-06	2	2	11.1	1.39	2.9e-06	2	2	14.6	0.5	4.9e-05	5	5	38.9	6.67	9.6e-12	6	7	38.9	5.81	3.7e-10	8	8	62.5	6.58	1.4e-11	8	9	53.5	8.39	6.1e-15	1	1	4.2	1.27	3.6e-06	1	1
[1263]		WP_011088783.1	11	14	50	7.51	2.7e-13	10	10	50	8.45	4.9e-15	10	12	50	7.46	3.3e-13	7	7	30.3	6.32	4.2e-11	7	7	38	5.32	3.6e-10	8	8	38.7	6.27	1.3e-11	10	11	50	7.79	8e-14	9	9	38.7	7.9	5e-14	9	12	50	7.78	8.3e-14	8	8
[1264]		WP_011085410.1	11	14	60.1	8.65	2e-15	9	11	41.3	8.23	1.2e-14	9	14	44.6	11.83	2.7e-21	11	13	60.1	8.54	3.4e-15	9	9	45.5	7.69	1.3e-13	11	15	60.1	8.09	2.2e-14	11	14	60.1	8.23	1.2e-14	10	13	56.3	10.54	6.5e-19	10	14	56.3	10.18	3.1e-18	10	12
[1265]		WP_027545778.1	12	16	55.9	8.73	1.5e-15	7	9	34.9	6.86	4.2e-12	9	11	30.7	10.73	2.9e-19	9	10	36.1	7.86	6e-14	8	8	36.1	6.14	9.2e-11	8	10	36.1	6.64	1.1e-11	8	11	40.8	9.4	8.5e-17	10	11	54.6	9.16	2.3e-16	10	13	42.9	6.97	2.7e-12	10	13
[1266]		WP_011090865.1	11	12	42.2	6.11	1e-10	13	13	39.8	6.22	6.6e-11	7	8	30.1	6.03	1.4e-10	9	9	33.3	4.37	2.6e-08	9	9	33.7	4.02	3.5e-09	11	11	34.5	7.39	4.5e-13	13	14	42.2	6.12	1e-10	11	11	34.5	5.67	6.7e-10	10	11	34.5	6.12	9.8e-11	12	12
[1267]		WP_011087555.1	10	16	56.3	7.7	1.2e-13	5	7	30.1	6.91	3.5e-12	7	9	45.4	6.61	1.3e-11	3	3	16.4	6.54	1.6e-11	5	6	37.2	8.2	1.4e-14	6	7	38.8	7.87	5.8e-14	6	8	43.7	6.64	1.1e-11	5	7	43.7	7.08	1.6e-12	6	10	31.7	7.04	2e-12	6	6
[1268]		WP_011088669.1	11	14	39.3	8.64	2.2e-15	7	8	30.4	7.37	2.5e-13	10	12	35.6	7.02	2.1e-12	8	9	26.7	7.16	2.4e-13	9	9	26.7	8.33	8.2e-15	11	13	31.6	7.23	8.9e-13	9	10	26.7	8.05	2.7e-14	9	11	35.6	8.92	6.5e-16	9	12	26.7	7.78	8.6e-14	8	9
[1269]		WP_011085567.1	10	10	44.6	9.64	3.1e-17	9	9	38.7	9.11	2.9e-16	9	9	41.7	9.21	1.9e-16	9	9	38.7	8.4	6e-15	7	7	29.5	7.36	7.8e-14	10	12	43.5	8.48	4.3e-15	9	10	37.3	9.3	1.3e-16	9	9	38.7	8.75	1.3e-15	8	8	33.9	10.38	1.3e-18	8	9
[1270]		WP_011090563.1	7	9	31.1	7.8	7.7e-14	5	6	18	7.15	1.2e-12	8	11	33.1	8.41	5.8e-15	9	10	30.2	7.6	1.8e-13						3	3	17.5	6.3	4.7e-11	2	2	10.9	6.05	2.4e-11	3	3	16.9	5.91	2.5e-10	9	12	37.6	7.82	7.1e-14	10	13
[1271]		WP_011085694.1	12	13	27.6	8.82	1e-15	8	8	24.3	9.06	3.6e-16	10	10	24.1	8.06	2.6e-14	10	10	28.7	8.4	6e-15	12	12	33.4	8.32	8.3e-15	10	10	25.2	9.4	8.6e-17	7	8	21.2	8.89	7.4e-16	10	10	20	9.12	2.8e-16	10	10	28.1	9.18	2.2e-16	9	9
[1272]		WP_011083279.1	11	15	37.2	9.54	4.7e-17	7	9	27	9.47	6.3e-17	9	14	34.7	8.36	7e-15	9	10	34.7	7.88	5.5e-14	7	7	27.6	5.2	5e-09	8	9	34.2	8.75	1.4e-15	9	11	34.7	7.22	9.1e-13	10	12	37.2	7.93	4.4e-14	8	9	27.6	9.75	1.9e-17	9	11
[1273]		WP_011083468.1	9	16	48.4	8.58	2.8e-15	8	14	43.5	7.2	1e-12	9	15	58.4	8.8	1.1e-15	8	12	55.3	6.91	3.4e-12	6	7	31.7	6.61	1.2e-11	8	14	51.6	6.05	1.4e-10	8	13	43.5	7.99	3.5e-14	7	11	36.6	7.95	4.2e-14	9	15	51.6	9.58	3.9e-17	7	11
[1274]		WP_011082942.1	9	10	21.7	7.05	1.9e-12	9	10	24.3	6.82	4.8e-12	8	8	22.3	7.22	9e-13	13	13	35.3	7.32	6e-13	6	6	18.5	5.64	5e-10	8	8	21.1	7.09	1.6e-12	9	9	21.7	7.03	2.1e-12	9	10	26.3	6.78	5.9e-12	10	11	29.5	7.03	2e-12	9	9
[1275]		WP_011086733.1	8	8	27.6	9.52	5.1e-17	10	10	32.1	8.37	7e-15	11	11	34.9	9.75	1.9e-17	9	9	29.3	5.92	1.3e-11	11	11	31.3	5.5	2.3e-11	10	10	30.7	8.41	5.8e-15	12	12	36.6	8.86	8.6e-16	9	9	26.5	6.69	4.5e-12	9	10	29.3	8	3.3e-14	9	9
[1276]		WP_011085026.1	10	10	10.1	6.2	1.6e-11	12	12	11.7	7.46	3.4e-13	14	14	14.8	6.84	4.7e-12	11	11	12	4.78	3.5e-09	4	4	4.1	3.74	8.3e-08	7	7	6.9	4.68	6.9e-10	8	8	8.6	7.79	1.5e-14	9	9	9.3	7.35	3.2e-13	10	10	11	5.43	2.1e-10	12	12
[1277]		WP_038966614.1	9	11	36.4	9.76	1.8e-17	9	10	35.3	8.61	2.5e-15	9	9	36.4	8.81	1e-15	9	11	28.8	7.31	6.2e-13	9	10	29.9	6.85	4.4e-12	10	12	32.6	7.46	3.3e-13	9	9	29.9	7.43	3.8e-13	10	11	38.5	8.66	2e-15	8	8	27.5	8.33	8.1e-15	10	11
[1278]		WP_011083288.1	10	10	28.2	8.64	2.1e-15	5	5	13.2	7.18	1.1e-12	6	8	22.3	8.32	8.4e-15	8	9	28.9	8.08	2.3e-14	7	8	24.6	5.85	7.1e-11	9	11	26.6	7.64	1.5e-13	9	10	37.6	8.87	8e-16	13	14	43.4	9.39	8.6e-17	10	11	33.2	7.14	1.3e-12	6	6
[1279]		WP_011085948.1	11	11	48.7	7.97	3.8e-14	10	10	50.6	8.27	1e-14	9	11	44.9	8.13	1.9e-14	11	11	45.3	8.92	6.6e-16	5	5	24.2	5.27	8.6e-11	11	11	49.1	8.46	4.6e-15	11	11	47.2	8.37	6.9e-15	9	10	44.9	8.85	8.9e-16	11	14	46.8	7.11	1.5e-12	9	9
[1280]		WP_038965338.1	12	13	48.5	8.73	1.5e-15	10	10	41.1	6.83	3.5e-12	11	11	46.4	8.75	1.3e-15	13	13	54.2	10.18	3e-18	9	10	38.4	8.47	3e-15	12	12	48.5	7.37	4.8e-13	11	14	46.4	9.68	2.6e-17	12	12	48.5	7.76	9.3e-14	12	14	43.2	8.59	2.7e-15	9	10
[1281]		WP_038965491.1	10	10	33.7	9.05	3.7e-16	2	2	6.4	5.08	5.4e-11	4	4	8.4	6.07	6e-11	3	3	11.3	3.15	5e-08	3	3	10.2	3.89	3.6e-10	5	5	16.9	8.87	8e-16	9	10	24.7	8.48	4.2e-15	12	13	36.6	9.21	1.9e-16	6	6	23.8	5.66	3.6e-11	3	3
[1282]		WP_011086079.1	11	12	37.2	7.31	6.4e-13	11	15	33.3	7.45	3.4e-13	12	15	40.5	7.74	1e-13	12	13	38.5	7.95	4.1e-14	8	9	21.2	6.86	4.2e-12	12	14	39.3	6.85	4.5e-12	10	14	34.8	7.23	8.7e-13	10	12	32.5	6.2	7.1e-11	8	10	29	7.3	6.4e-13	10	11
[1283]		WP_011088829.1	7	8	27.3	8.62	2.4e-15	11	13	37.4	10.38	1.3e-18	10	10	39.9	8.53	3.5e-15	11	11	35.3	7.41	4.1e-13	5	5	22.1	6.12	9.8e-11	8	8	21.8	6.55	1.6e-11	9	9	42.5	9.02	4.2e-16	9	9	36.5	6.39	3.2e-11	10	10	42.5	8.88	7.9e-16	11	11
[1284]		WP_028171111.1	11	13	68.7	8.12	1.9e-14	6	6	23	7.42	3.9e-13	8	9	43.3	7.07	1.8e-12	7	7	32.7	6.88	3.9e-12	6	8	30	7.23	8.9e-13	9	9	51.2	6.95	2.9e-12	7	9	40.6	7.64	1.5e-13	7	8	40.6	7.41	4e-13	10	10	55.3	8.1	2.1e-14	7	7
[1285]		WP_011086446.1	14	14	43.4	7.76	9.2e-14	10	11	29.7	5.6	6.6e-11	9	10	27.9	4.68	1.8e-09	12	12	43.4	7.36	5.1e-13	7	7	23.4	3.58	2.1e-08	11	11	40	7.97	3.8e-14	9	10	28.3	5.99	2.5e-11	10	10	33.8	8.01	3.2e-14	13	13	42.4	7.83	6.7e-14	8	8
[1286]		WP_011086726.1	10	11	34.4	9.79	1.6e-17	9	12	31.4	7.53	2.4e-13	8	8	31.9	7.19	1.1e-12	10	11	35.9	6.65	8.6e-12	7	7	27.6	5.18	2.7e-10	10	10	36.9	7.29	2.9e-13	9	12	30.4	6.84	4.6e-12	7	9	22.4	7.32	6e-13	11	13	38.9	7.73	1e-13	5	6
[1287]		WP_038966309.1	10	11	34.7	7.43	3.7e-13	12	12	29.9	7.04	2e-12	9	10	27.5	7.52	2.5e-13	11	11	26.5	7.81	7.3e-14	8	8	23.4	7.64	1.5e-13	10	10	28.5	7.08	1.7e-12	11	12	27.7	7.58	2e-13	10	12	34.3	7.84	6.4e-14	10	11	30.1	7.57	2.1e-13	10	10
[1288]		WP_011083501.1	11	17	38.4	10.09	4.4e-18	10	13	36.7	7.3	6.5e-13	11	16	38.4	7.8	7.8e-14	10	13	34.2	7.32	6.1e-13	11	13	39.7	7.53	2.4e-13	10	12	34.2	7.04	2e-12	11	15	38.4	9.42	7.8e-17	9	12	34.2	9.84	1.3e-17	10	13	36.7	6.95	2.9e-12	8	10
[1289]		WP_011083257.1	10	10	42.2	7.2	9.9e-13	9	10	30.3	6.29	4.9e-11	9	10	34.4	6.64	1.1e-11	9	9	41.9	6.65	1.1e-11	8	8	38.4	6.74	7.1e-12	12	12	46.2	7.32	6.1e-13	14	14	46.8	7.34	5.5e-13	9	10	38.7	7.39	4.5e-13	10	11	43.1	7.6	1.8e-13	8	8
[1290]		WP_038965336.1	9	9	26.6	5.12	9.9e-10	9	10	26.1	4.3	5.4e-08	13	14	39.3	6.83	4.8e-12	10	10	30.4	6.92	3.3e-12	12	12	37.8	5.04	9.8e-09	13	13	35.2	6.96	2.8e-12	8	8	25.8	3.89	4.6e-08	9	9	36.1	8.82	9.8e-16	9	9	26.4	6.54	1.7e-11	11	12
[1291]		WP_011083364.1	8	8	17.5	4.28	7.5e-09	13	13	31.8	7.57	2e-13	10	10	25.4	8.55	3.2e-15	9	9	26.8	6.39	1.3e-11	6	6	17.9	4.56	3.5e-10	7	7	20.2	5.49	6.1e-12	4	4	9.4	4.88	3.3e-10	5	5	15	5.69	2.7e-10	11	11	30.4	5.66	1.2e-10	11	11
[1292]		WP_038967020.1	8	11	44.9	9.71	2.3e-17	8	9	42.1	9.25	1.6e-16	7	8	37.8	9.46	6.6e-17	9	10	40.9	7.48	3e-13	11	11	52.4	7.17	1.1e-12	10	12	49.2	7.93	4.4e-14	7	8	35.4	6.93	3.2e-12	5	6	22.4	6.21	6.7e-11	10	12	53.5	9.64	3e-17	10	11
[1293]		WP_038967533.1	11	17	67.9	9.08	3.3e-16	6	9	42.8	8.23	1.2e-14	10	13	55.6	9.36	9.9e-17	7	7	54.5	6.55	1.6e-11	6	7	38.5	8.81	1.1e-15	9	11	61.5	8.69	1.8e-15	8	11	64.2	8.53	3.4e-15	9	12	50.8	8.48	4.2e-15	6	10	48.7	8.72	1.5e-15	6	9
[1294]		WP_011082936.1	9	11	27.6	5.83	1e-11	10	11	30.3	9.97	7.3e-18	10	11	30.3	10.51	7.4e-19	10	11	33.6	9.7	2.3e-17	5	5	15	3.65	1e-07	7	7	26.1	6.1	6.3e-11	7	7	26.1	8.86	8.5e-16	6	6	21	7.61	1.7e-13	11	12	33	5.64	1.4e-10	8	10
[1295]		WP_202557266.1	12	13	21.3	6.93	3.1e-12	15	16	22	6.3	4.7e-11	10	11	17	6.52	1.8e-11	10	10	15	4.64	5.5e-10	14	16	21.3	4.88	2e-08	14	16	17.4	5.38	2.3e-09	11	12	16.5	6.78	6e-12	12	14	18.7	5.41	2e-09	15	16	23.4	7.8	5.4e-14	13	13
[1296]		WP_011085440.1	11	11	49.6	6.87	4.1e-12	10	11	38.9	6.87	4.1e-12	11	11	49.6	6.41	2.9e-11	10	10	38.9	6.25	2.5e-11	7	7	33.3	5.09	1.4e-10	10	10	38.9	6.9	3.6e-12	9	10	37.3	6.39	3.1e-11	11	11	49.6	6.6	1.3e-11	10	10	38.9	6.81	5.2e-12	8	8
[1297]		WP_011084012.1	12	13	52	10.04	5.5e-18	4	4	22.9	5.32	1.4e-09	7	7	44.8	6.66	9.5e-12	4	4	18.4	5.46	1.7e-09	2	2	9.4	3.05	4.3e-08	8	8	39	6.61	1.2e-11	6	6	34.5	6.06	1.2e-10	6	6	29.1	5.18	4.8e-10	7	7	38.1	5.94	2.2e-10	7	7
[1298]		WP_011089437.1	9	11	39.6	7.73	1e-13	8	9	32.5	7.89	5.3e-14	11	13	36	8.46	4.6e-15	7	7	26.6	5.55	1.1e-09	5	5	21.4	6.54	3.3e-12	9	10	36.4	8.05	2.7e-14	6	7	24.7	7.53	2.4e-13	6	7	26.6	7.76	9.3e-14	11	12	37.3	8.05	2.6e-14	10	12
[1299]		WP_011083455.1	10	12	43.7	8.84	9.3e-16	8	8	34.4	8.2	1.4e-14	8	8	41.5	8.48	4.2e-15	9	9	37.7	5.85	7.5e-11	8	8	36.6	7.48	1.6e-13	10	10	42.6	9.6	2.7e-17	10	11	42.6	6.52	1.8e-11	9	9	41.5	8.34	7.7e-15	7	8	36.6	6.73	7.5e-12	9	10
[1300]		WP_011088690.1	10	11	49.2	7.05	1.9e-12	7	7	34.5	5.8	4e-10	8	8	36.1	7.5	2.8e-13	7	7	29.8	5.54	5.2e-10	4	4	21	6.38	3.2e-11	9	9	39.9	5.77	4.5e-10	9	9	40.8	7.94	4.2e-14	8	8	35.3	7.74	1e-13	8	8	40.8	7.1	1.5e-12	8	8
[1301]		WP_236842234.1	6	6	18.1	8.49	1.7e-15	6	6	16.4	7.36	5e-13	7	7	20.6	8.57	2.9e-15	10	12	27.5	9.15	2.5e-16	4	4	8.3	6.13	9.1e-12	3	3	6.8	7.24	8.4e-13	5	5	14.3	7.5	2.8e-13	7	8	19.8	9.05	3.8e-16	5	6	12.6	9.26	1.5e-16	6	6
[1302]		WP_011088984.1	11	11	31	5.96	2e-10	9	10	26.8	6.73	7.5e-12	10	10	27	6.72	7.8e-12	11	11	29.6	6.72	7.8e-12	11	11	29.9	6.92	3.2e-12	12	12	37.6	6.9	3.6e-12	8	8	21	6.37	3.5e-11	8	8	21.9	7.22	9.2e-13	7	7	20.1	7.09	1.6e-12	9	9
[1303]		WP_011083477.1	10	13	45.7	6.26	5.5e-11	11	13	45.7	5.93	2.2e-10	9	10	43.7	7.39	4.4e-13	10	11	39.6	7	2.3e-12	7	8	37.6	6.11	4.1e-11	9	10	39.6	6.82	5e-12	10	13	45.7	6.59	1.3e-11	9	11	39.6	5.75	4.8e-10	9	10	45.7	7.25	8.2e-13	9	11
[1304]		WP_011088652.1	12	13	33.7	7.41	4e-13	11	12	28.3	8.6	2.6e-15	11	12	27.9	5.12	2.5e-09	11	12	27.2	6.26	3.1e-11	12	12	28.6	3.9	1.8e-08	9	9	25.5	6.35	3.7e-11	11	11	27.9	6.2	4.8e-11	10	11	29.3	8.54	3.4e-15	10	10	30.4	5.76	2.9e-10	11	11
[1305]		WP_011090016.1	14	15	41.9	6.83	4.8e-12	10	10	28.6	5.85	3.1e-10	10	11	25.9	5.39	2.2e-09	7	7	18.9	3.01	1.4e-07	7	7	20	3.51	1e-07	10	11	28.4	7.49	2.9e-13	10	11	30	5.74	5.1e-10	9	10	25.9	5.45	1.7e-09	11	11	25.9	6.17	8.2e-11	9	11
[1306]		WP_038965394.1	6	6	14.3	3.63	2.1e-08	7	7	17.5	6.32	4.2e-11	8	8	14.8	6.08	1.2e-10	13	14	22.5	6.75	6.7e-12	1	1	2.9	0.29	2.6e-05	2	2	4.6	1.31	2.4e-06	4	4	8.8	3.72	3.3e-09	9	9	17.5	5.08	4.2e-10	9	10	20.1	5.9	2.6e-10	6	7
[1307]		WP_038966696.1	9	10	25.6	6.54	1.6e-11	8	9	23.8	6.99	3.2e-13	10	12	24	7.36	5.1e-13	9	10	25.6	7.95	4e-14	5	5	15.6	4.22	6.8e-09	9	9	21.5	7.9	5.1e-14	9	9	27.1	5.29	4.5e-11	12	13	32.7	7.49	2.9e-13	11	12	29.9	7.55	2.2e-13	8	8
[1308]		WP_011090523.1	10	10	25.8	8.48	4.2e-15	12	14	27.3	8.55	3.2e-15	11	12	23.7	7.92	4.7e-14	13	13	33.1	6.3	4.5e-11	5	5	13	3.84	1.6e-08	10	10	26.3	6.75	6.9e-12	10	10	24.9	6.23	3.3e-11	9	9	24.9	7.56	2.2e-13	12	14	28	9.08	3.3e-16	11	12
[1308-1]	15	WP_011090524.1	7	7	21	7.43	3.7e-13	9	10	21.9	6.23	5.3e-11	9	9	21	8.16	1.7e-14	13	14	31.8	5.98	1.7e-10	2	2	3.9	1.76	4.8e-06	8	8	23.1	5.89	1.5e-10	9	9	23.9	7.17	6.4e-13	5	5	14.2	6.66	3.4e-12	8	9	23.4	6.11	4.5e-11	10	11
[1309]		WP_011087336.1	8	14	31	9.63	3.1e-17	8	13	31	8.87	8.1e-16	8	12	31	9.06	3.5e-16	7	9	26.3	9.04	4e-16	8	11	31	9.09	3.1e-16	8	12	31	8.57	2.9e-15	8	16	31	9.62	3.3e-17	9	17	37.5	9.37	9.5e-17	8	12	31	8.27	1e-14	7	9
[1310]		WP_011083481.1	10	12	38.9	6.66	1e-11	11	13	35.8	7.75	9.4e-14	10	13	38.9	9.02	4.2e-16	10	11	35.8	9.4	8.3e-17	11	11	39.3	6.11	3.3e-11	11	13	35.8	7.95	4.2e-14	11	14	39.3	7.1	1.5e-12	11	14	36.2	8.74	1.4e-15	12	14	39.3	6.36	3.6e-11	12	13
[1311]		WP_011082981.1	8	9	23.1	8.07	2.4e-14	5	6	17.1	6.73	7.5e-12	5	6	14.5	7.01	2.2e-12	6	7	15.8	7.42	3.8e-13	6	7	11.7	6.84	4.6e-12	8	9	20.2	6.46	2.3e-11	10	12	32.4	8.54	3.4e-15	7	8	18.1	6.55	1.6e-11	8	9	32.1	6.83	4.7e-12	3	4
[1312]		WP_011088081.1	11	14	89.1	7.27	7.5e-13	8	10	75.8	3.68	2.1e-07	8	9	75.8	5.94	2.2e-10	8	9	72.7	4.8	7e-09	3	3	19.5	2.85	2e-07	7	7	71.1	5.34	2.8e-09	8	9	75.8	6.4	3e-11	7	8	51.6	7.03	2.1e-12	10	12	85.2	6.65	1.1e-11	12	15
[1313]		WP_038967375.1	11	12	34.7	7.29	6.7e-13	11	12	31.6	7.12	1.4e-12	12	13	34.4	6.73	7.6e-12	11	12	29.1	6.46	2.3e-11	8	8	19.6	5.46	2.5e-10	12	13	34.7	6.51	1.9e-11	11	12	29.1	7.07	1.7e-12	10	11	29.1	6.55	1.6e-11	9	10	26.4	7.06	1.8e-12	10	11
[1314]		WP_011084197.1	9	15	32.8	9	4.7e-16	8	12	32.8	8.66	2e-15	10	14	32.8	8.3	9e-15	11	13	33.1	7.25	8.1e-13	10	12	33.1	8.89	7.4e-16	9	13	32.8	7.7	1.2e-13	9	12	23.5	8.17	1.6e-14	8	12	23.5	8.01	3.1e-14	8	12	27.6	8.18	1.5e-14	9	10
[1315]		WP_011084174.1	10	10	23.9	5.95	2.1e-10	13	14	37.8	7.2	9.9e-13	13	14	41.4	5.81	3.7e-10	9	9	32.6	5.37	2.4e-09	9	10	29.9	5.93	2.2e-10	11	12	33.8	6.98	2.6e-12	12	13	37.5	7.22	9.3e-13	12	12	37.8	5.57	1.1e-09	13	13	43.8	6.65	1.1e-11	8	9
[1316]		WP_028175401.1	10	11	25.2	6.17	3.3e-11	8	8	21.4	5.76	4.7e-10	7	8	19.1	8.03	3e-14	12	13	24.7	6.83	4.9e-12	7	7	16.6	3.54	7.1e-08	8	10	20.3	10.21	2.7e-18	8	8	18.9	4.77	1.1e-08	10	11	23.8	6.14	9.4e-11	9	9	24.7	6.61	1.2e-11	10	11
[1317]		WP_028172814.1	9	9	33.3	7.86	6e-14	8	8	30.3	7.84	6.4e-14	9	9	35	9.08	3.3e-16	8	9	27.4	6.8	5.5e-12	3	3	12.5	2.29	1.5e-07	5	5	21	4.42	2e-09	7	7	24.4	6.32	4.2e-11	7	7	25.9	6.49	8.9e-12	9	9	33.3	9.3	1.3e-16	8	8
[1318]		WP_038965384.1	9	10	33.9	7.85	6.3e-14	4	4	17.4	6.99	2.4e-12	8	9	30.3	9.44	7.2e-17	8	9	27.3	7.03	2.1e-12	7	8	21.6	7.74	7e-14	8	9	27.3	7.62	1.6e-13	8	9	35.4	7.76	9.3e-14	7	8	32.7	8.12	2e-14	10	11	39.3	7.7	1.2e-13	11	12
[1319]		WP_011085544.1	11	14	60.5	8.26	1.1e-14	6	7	24.4	6.7	8.4e-12	8	10	48.3	7.22	9.3e-13	5	6	27.3	5.8	3.8e-10	4	4	21	5.17	5.8e-09	7	8	51.7	5.84	3.3e-10	8	9	48.3	6.32	4.2e-11	7	8	36.1	5.94	2.1e-10	7	8	36.1	6.23	6.3e-11	6	7
[1320]		WP_011087698.1	11	11	11.2	5.76	2.2e-10	13	13	11.8	6.41	2.9e-11	15	15	17.7	5.67	6.5e-10	12	12	12	6.86	4.3e-12	7	7	6.7	5.41	3.1e-10	9	9	8.7	6.61	1.2e-11	8	8	9.9	6.22	6.5e-11	14	14	12.8	5.68	6.5e-10	9	9	9.4	6.58	1.4e-11	11	11
[1321]		WP_011089504.1	12	12	17.6	6.98	2.6e-12	14	15	19.1	6.06	1.3e-10	13	13	21.4	7.3	6.4e-13	14	14	20.1	6.43	2.7e-11	14	14	19.1	6.31	1.5e-11	10	10	14.2	6.23	6.3e-11	10	10	16.1	6.05	1.3e-10	11	11	15.5	5.79	4.1e-10	15	15	20.2	6.39	3.2e-11	13	13
[1322]		WP_011086710.1	9	11	55.4	7.99	3.4e-14	8	9	40.6	7.62	1.7e-13	10	12	55.4	10.93	1.2e-19	6	8	33.7	10.68	3.6e-19	4	5	33.7	6.31	2.1e-11	9	10	57.1	7.78	8.3e-14	8	9	55.4	7.44	3.6e-13	8	9	52.6	10.31	1.7e-18	9	12	55.4	9.04	3.9e-16	7	7
[1323]		WP_028172453.1	10	10	32.8	8.5	3.9e-15	11	12	33.9	7.14	1.3e-12	12	12	38.3	7.61	1.8e-13	13	14	42.7	6.05	1.3e-10	12	12	29.4	8.58	2.7e-15	10	11	22.1	7.51	2.6e-13	12	12	35.7	5.81	3.8e-10	13	14	33.3	8.78	1.2e-15	8	8	23.2	8.28	9.9e-15	8	9
[1324]		WP_011085321.1	9	13	38.1	9.11	2.8e-16	6	8	32.8	7.85	6.2e-14	6	8	32.8	7.88	5.6e-14	3	3	13.6	4.35	1.1e-08	6	8	26.5	7.53	2.5e-13	8	8	27.2	7.62	1.7e-13	5	7	26.8	8.42	5.6e-15	7	8	26.5	8.26	1.1e-14	7	10	32.8	8.99	4.9e-16	5	6
[1325]		WP_011087492.1	12	12	45.6	7.35	5.2e-13	1	1	5.5	-0.05	0.00086	1	1	2.9	-0.46	0.00076	2	2	8.8	3	8.3e-08	6	6	27.7	7.36	4.6e-13	4	4	17.2	3.81	1.6e-08	5	5	16.8	7.24	8.5e-13	4	4	16.8	3.99	4.3e-09						1	1
[1326]		WP_008130072.1	10	19	73.5	8.37	6.8e-15	6	8	47.1	7.07	1.8e-12	8	10	54.8	7.67	1.3e-13	10	10	67.1	7.09	1.6e-12	5	6	29.7	6.85	4.4e-12	8	10	60.6	7.01	2.2e-12	10	12	61.9	7.37	4.9e-13	6	8	44.5	6.97	2.6e-12	9	12	57.4	7.7	1.2e-13	7	10
[1327]		WP_038967026.1	6	6	17	7.57	2.1e-13	7	8	23.1	6.9	3.6e-12	11	12	40.8	7.04	2e-12	10	10	29.5	7.92	4.5e-14	9	9	29	6.54	1.4e-11	10	12	29.5	6.72	7.6e-12	9	10	33.2	7.28	7.1e-13	11	11	35.9	7.08	1.7e-12	8	8	30.2	7.6	1.8e-13	8	8
[1328]		WP_011089733.1	8	8	26.7	7.35	5.3e-13	10	10	33.8	7.86	6e-14	8	8	26.2	7.58	2e-13	10	10	27.5	7.07	1.2e-12	8	8	27.7	7.67	1.4e-13	12	12	39.9	7.54	2.4e-13	9	9	32.1	8.2	1.4e-14	8	9	27.7	7.83	6.7e-14	10	10	30.8	8.31	8.7e-15	9	9
[1329]		WP_038966304.1	10	11	34.3	10.16	3.3e-18	9	10	32.5	9.35	1e-16	8	9	39.5	6.83	4.9e-12	7	8	27.3	9.06	1.9e-16	7	7	32.2	4.64	4.2e-09	8	9	38.1	9.23	1.8e-16	11	12	34.3	9.54	4.7e-17	6	8	26.6	9.38	9.2e-17	10	11	45.1	9.96	7.8e-18	11	12
[1330]		WP_038967240.1	13	14	24.7	5.84	9e-12	12	14	24.4	5.58	1.6e-11	12	13	23.9	6.86	4.2e-12	11	13	24	7.5	2.8e-13	9	10	18.3	5.64	1e-10	12	12	25.8	5.1	2.4e-10	12	13	25.8	6.8	5.4e-12	14	17	27.5	8.38	6.7e-15	10	11	21.1	8.88	7.8e-16	10	12
[1331]		WP_011086683.1	11	13	21.8	6.9	3.5e-12	9	10	21.8	6.63	1.1e-11	10	12	18.7	7.28	7.1e-13	10	10	21.8	6.3	4.6e-11	9	10	21.8	5.94	1.4e-10	8	9	18.7	6.88	4e-12	10	12	21.8	7	2.3e-12	11	13	22.7	6.94	3.1e-12	10	12	18.7	6.62	1.2e-11	9	10
[1332]		WP_011083659.1	11	12	55.6	7.56	2.1e-13	5	5	34.5	6.22	6.6e-11	9	9	47.1	7.46	3.4e-13	3	3	16.6	6.88	3.9e-12	6	6	35.9	7.24	8.5e-13	11	12	64.1	7.96	3.9e-14	9	9	50.7	7.57	2.1e-13	7	7	40.4	5.88	2.8e-10	9	9	37.2	6.72	7.7e-12	8	8
[1333]		WP_028173962.1	9	10	41.9	5.97	1.9e-10	8	8	36.3	8	3.3e-14	8	8	39.4	8.8	1.1e-15	9	9	38.1	8.18	1.5e-14	12	12	48.8	9.09	3.2e-16	12	13	57.1	9.27	1.5e-16	9	11	38.1	7.71	1.2e-13	9	11	45	9.67	2.7e-17	8	8	39.4	9.29	1.3e-16	9	9
[1334]		WP_011087578.1	11	14	42.5	8.05	2.7e-14	5	6	19.8	4.31	2.2e-09	10	12	35.2	8.39	6.3e-15	9	9	34.1	3.63	8.1e-08	8	8	30.8	6.86	4.2e-12	9	10	42.5	4.31	2.9e-09	9	10	36.6	6.24	6.1e-11	8	9	24.2	9.22	1.8e-16	7	8	24.2	5.96	1.3e-10	8	8
[1335]		WP_011084001.1	7	10	20.7	7.61	1.7e-13	9	12	30.8	6.82	5e-12	9	10	24.7	6.76	6.6e-12	9	12	30.5	6.74	7.2e-12	8	10	22.1	7.29	6.7e-13	12	15	30.5	7.13	1.3e-12	9	11	26.6	7.63	1.6e-13	9	12	29.1	6.32	4.2e-11	8	11	25.9	6.56	1.5e-11	6	8
[1336]		WP_027543772.1	10	10	38.7	7.42	3.9e-13	11	11	34.3	7.4	4.3e-13	12	14	43.4	7.63	1.6e-13	8	9	28.6	6.28	4e-11	7	8	30.2	5.29	1.8e-10	8	8	28.9	7.39	4.4e-13	7	8	27.4	7.54	1.6e-13	6	6	23.9	7.94	4.2e-14	9	9	33.6	7.45	3.4e-13	9	9
[1337]		WP_011089580.1	6	7	23.1	8.4	6e-15	6	7	20.3	7.61	1.7e-13	7	8	23.7	5.78	2e-10	7	8	19.3	5.93	1.4e-10	7	9	23.1	8.33	1.4e-15	8	8	23.7	6.45	2.4e-11	9	10	31.5	7.7	1.2e-13	9	10	23.7	6.5	2e-11	8	10	28.8	8.87	8e-16	8	10
[1338]		WP_011086825.1	7	7	14.7	7.21	6.7e-13	9	9	23.2	8.27	1e-14	8	8	16.6	8.18	1.5e-14	8	8	17.9	6.23	6.2e-11	10	10	24.5	6.31	2.6e-11	13	14	29.1	7.96	3.9e-14	9	10	21.7	8.64	2.1e-15	8	8	22.3	8.42	5.5e-15	8	8	19.6	7.3	6.6e-13	8	9
[1339]		WP_038967036.1	9	10	25.1	6.84	4.6e-12	11	12	32.8	7.75	9.7e-14	11	11	24.4	6.32	4.3e-11	9	9	26.4	6.74	7.1e-12	11	11	28.6	6.22	6.5e-11	12	13	31.5	6.85	4.5e-12	10	11	26.8	6.47	2.3e-11	10	11	26.8	6.76	6.4e-12	12	12	32.5	5.99	1.7e-10	11	11
[1340]		WP_011090201.1	12	13	33.9	6.76	6.6e-12	9	9	31.5	6.24	1.9e-11	11	11	41.3	6.93	3.2e-12	12	13	45.8	7.74	1e-13	10	10	37.4	6.93	3.2e-12	11	11	39.9	6.59	1.3e-11	10	11	26.9	7.38	4.6e-13	10	10	30.8	6.94	3e-12	9	9	25.5	6.61	1.2e-11	8	8
[1341]		WP_011089252.1	10	12	35.2	7.54	2.3e-13	9	13	26.5	7.71	1.2e-13	10	11	31.8	7.73	1.1e-13	9	9	31.4	5.61	8.9e-10	12	12	32.2	6.57	1.5e-11	12	16	28.8	7.57	2.1e-13	13	14	38.3	7.63	1.6e-13	10	13	31.8	7.86	5.9e-14	13	15	31.8	7.5	2.8e-13	8	10
[1342]		WP_011088806.1	7	7	24.9	9.87	1.1e-17	9	9	21.4	9.25	1.6e-16	6	7	20.4	10.81	2.1e-19	7	7	19.8	8.45	4.9e-15	4	4	17.2	8.38	9.2e-16	9	9	24.9	8.43	5.3e-15	8	8	24.9	9.79	1.6e-17	10	11	24.9	7.61	1.7e-13	7	8	19.8	8.3	9.3e-15	9	9
[1342-1]	2	WP_063921501.1	1	1	3.4	9.87	1.1e-17	3	3	5.8	9.25	1.6e-16	3	3	5.8	10.22	2.1e-19	3	3	5.8	8.1	4.9e-15	1	1	3.4	8.21	9.2e-16	3	3	5.8	8.32	5.3e-15	2	2	5.8	9.69	1.6e-17	2	2	3.4	6.73	1.7e-13	1	1	3.4	2.47	4.8e-07	2	2
[1343]		WP_011087286.1	12	15	36	6.07	1.3e-10	11	13	31.8	7.61	1.8e-13	9	11	31.8	7.77	8.8e-14	12	12	34.1	6.98	2.5e-12	10	12	38.4	5.86	3.7e-11	12	13	38	7.25	8.1e-13	13	14	45.3	6.7	8.4e-12	12	14	36	7.42	3.9e-13	9	13	31.8	6.3	4.7e-11	11	12
[1344]		WP_028174966.1	11	13	64.9	7.95	4.1e-14	6	6	31.2	6.59	1.4e-11	6	7	33.2	6.82	5e-12	7	7	37.6	6.2	1.7e-11	7	7	33.2	2.77	1.4e-07	9	9	60.4	9.76	1.8e-17	6	6	33.2	7.96	3.9e-14	8	8	53	9.11	2.9e-16	8	8	48.5	5.98	1.8e-10	9	10
[1345]		WP_011083689.1	9	9	12.7	6.16	8.3e-11	13	13	25	6.77	6.4e-12	11	11	20.7	6.26	5.6e-11	9	9	14	6.28	5e-11	6	6	10.4	3.85	7.7e-09	7	7	8.9	4.7	5.1e-09	7	7	11.4	4.84	9.4e-09	10	10	16.9	6.64	1.1e-11	11	11	20.5	6.93	3.2e-12	13	14
[1346]		WP_028173542.1	13	15	22.4	5.94	2.2e-10	13	15	22.1	7.03	2.1e-12	12	15	22.2	7.28	7.1e-13	12	14	23.6	6.94	3.1e-12	8	9	15.4	4.42	1.3e-08	12	13	23.1	8.21	1.3e-14	14	16	24.4	8.42	5.6e-15	9	10	16.7	6.61	1.2e-11	11	12	20.4	7.09	1.6e-12	13	14
[1347]		WP_011086172.1	9	11	33.3	6.81	5.3e-12	9	9	36.9	6.87	4.1e-12	8	8	35.7	6.14	9.4e-11	10	11	39.3	7.12	1.4e-12	4	4	15.1	6.54	1.2e-11	11	11	46.4	6	1.7e-10	8	8	29.8	6.53	1.8e-11	8	8	29	6.96	2.7e-12	8	8	33.3	6.54	1.7e-11	11	11
[1348]		WP_011089884.1	10	18	54.3	9.17	2.2e-16	3	3	22.2	4.89	4.3e-09	6	6	28.4	6.28	3.5e-12	6	6	23.5	4.46	2.3e-08	4	4	23.5	5.2	8.8e-10	7	7	32.1	9.2	1.9e-16	8	8	46.9	9.71	2.2e-17	6	7	30.2	9.07	3.5e-16	6	6	28.4	8.55	3.1e-15	5	5
[1349]		WP_026312933.1	6	6	35.7	8.59	2.6e-15	2	2	9.7	2.29	2.1e-07	6	6	35.7	10.01	6.4e-18	2	2	13.2	2.42	1e-06	3	3	16.3	7.66	6.6e-15	9	10	35.7	6.36	3.5e-11	11	12	48.5	6.92	3.4e-12	9	10	48.5	6.07	1.2e-10	5	5	30	5.54	1.1e-10	3	3
[1350]		WP_011088763.1	5	5	7.9	5.98	1.8e-10	9	9	13.7	5.6	9.1e-10	12	12	23.1	7.24	8.6e-13	11	12	16.8	7.08	1.6e-12	6	6	10.7	4.7	1.8e-09	9	9	18.4	7.25	8.1e-13	4	4	6.4	6.15	8.9e-11	6	6	14	6.74	7.1e-12	12	12	22.4	7.83	6.7e-14	10	10
[1351]		WP_011089637.1	7	8	19.7	7.51	2.7e-13	4	4	9.9	6.96	2.8e-12	10	11	28.6	8.25	1.1e-14	8	9	26	7.28	7e-13	7	7	15.3	7.17	1.1e-12	10	11	31.2	7.34	5.5e-13	8	10	27.3	10.04	5.5e-18	8	8	21	7.99	3.5e-14	8	8	23.6	8.05	2.7e-14	7	7
[1352]		WP_011090511.1	10	18	54.6	7.61	1.7e-13	8	9	41.7	7.07	1.8e-12	8	13	54.6	7.89	5.2e-14	8	12	49.7	7.65	1.4e-13	3	3	22.7	1.45	3.5e-06	4	4	32.5	8.32	3.8e-15	3	4	22.7	7.83	6.8e-14	5	6	39.9	8.02	3.1e-14	9	15	51.5	7.51	2.7e-13	7	8
[1353]		WP_038967576.1	10	14	43.2	8.5	3.9e-15	8	9	34.5	6.8	5.6e-12	8	12	41.4	7.37	4.8e-13	8	10	34.1	7.67	1.3e-13	8	9	32.7	6.44	2.6e-11	11	13	57.3	7.55	2.3e-13	9	11	41.4	8.8	1.1e-15	9	13	34.5	7.77	8.7e-14	10	13	41.4	7.35	5.3e-13	11	12
[1354]		WP_011087337.1	8	13	52.3	7.94	4.3e-14	6	7	38.7	8.52	3.5e-15	11	14	60.9	8.8	1.1e-15	7	9	41.2	6.22	6.5e-11	9	12	41.2	8.07	2.4e-14	11	15	64.6	7.41	4.1e-13	8	11	47.3	8.47	4.4e-15	7	10	43.6	7.85	6.4e-14	8	13	36.2	7.9	5e-14	9	15
[1355]		WP_011086838.1	7	7	17.5	7.34	5.6e-13	8	9	19.1	7.58	1.9e-13	9	10	20.6	7.66	1.4e-13	7	7	16.4	7.09	1.6e-12	10	10	23.9	7.46	3.7e-14	9	9	22	7.94	4.3e-14	11	11	33.1	7.39	4.4e-13	11	11	25.8	7.25	8e-13	8	9	23.3	7.37	4.8e-13	10	11
[1356]		WP_011088409.1	7	10	33.4	9.77	1.7e-17	6	8	29.1	10.48	8.4e-19	7	9	28.5	10.99	9.4e-20	9	12	36.1	9.36	1e-16	9	10	36.1	6.81	5.4e-12	11	15	44.7	9.8	1.6e-17	9	13	42.4	8.27	1e-14	9	13	38.1	9.71	2.2e-17	8	10	33.8	8.91	6.8e-16	10	10
[1357]		WP_011085745.1	7	12	33.8	10.79	2.2e-19	8	14	43	10.73	2.9e-19	8	14	34.6	10.11	4.1e-18	6	12	34.6	11.25	3.2e-20	6	8	34.6	7.56	1.6e-14	7	13	34.6	9.14	2.6e-16	8	14	43	9.56	4.3e-17	9	16	43	10.55	6.4e-19	7	13	34.6	10.67	3.8e-19	6	11
[1358]		WP_011087360.1	6	7	25	7.69	1.2e-13	5	6	17.4	5.62	8.6e-10	7	8	22.5	8.83	9.4e-16	8	9	29	7.95	4.1e-14	4	4	16.7	8.24	1.2e-14	8	8	33	7.1	1.6e-12	6	8	27.9	6.49	2.1e-11	6	8	22.5	8.82	1e-15	9	12	35.5	8.43	5.3e-15	7	9
[1359]		WP_011090693.1	11	12	30.4	7.89	5.4e-14	10	10	32.1	8.37	6.8e-15	7	7	22.1	8.95	5.8e-16	8	8	23.4	7.9	5.1e-14	2	2	6	4.87	5.2e-11	8	8	22.6	7.68	9e-14	9	9	29.4	7.17	9e-13	10	10	32.1	7.89	5.2e-14	9	10	25.5	7.29	6.8e-13	5	5
[1360]		WP_028174612.1	9	13	46.8	10.65	4.2e-19	5	5	42.8	8.41	5.8e-15	5	5	24.3	7.6	1.9e-13	3	4	13.3	3.33	2.8e-08	2	2	11.6	5.42	1.9e-10	5	6	38.2	8.18	1.5e-14	5	6	35.8	6.59	1.4e-11	7	8	46.8	7.91	4.9e-14	5	6	42.8	8.59	2.7e-15	6	7
[1361]		WP_011087874.1	11	11	47.2	8.66	2e-15	7	7	28.8	9.8	1.6e-17	10	10	40.4	9.85	1.2e-17	8	8	30.8	8.66	2e-15	6	6	24.8	9.04	3.9e-16	6	6	23.6	9.04	3.9e-16	8	8	26	5.75	2e-10	9	9	36.4	10.27	2.1e-18	11	11	40.4	8.34	7.7e-15	7	7
[1362]		WP_011090604.1	9	12	40.4	8.23	1.2e-14	7	9	36.8	6.63	1.1e-11	8	10	32.4	6.49	2.1e-11	6	8	28.8	3.88	2.3e-08	6	7	24	5.72	3.5e-10	10	13	40.4	8.81	1.1e-15	8	9	38.8	7.38	4.6e-13	6	8	30.4	8.42	5.5e-15	9	12	40.4	8.52	3.6e-15	6	7
[1363]		WP_038967093.1	12	12	29.3	7.17	1.1e-12	10	10	23.3	8.57	2.9e-15	7	8	15.5	6.42	2.7e-11	11	11	24.3	6.7	8.6e-12	8	8	19.5	5.17	2.3e-10	11	11	25.6	7.13	1.3e-12	11	11	26.6	7.08	1.7e-12	9	9	21.1	7.73	1e-13	9	9	23.6	7.09	1.6e-12	9	10
[1364]		WP_011087065.1	9	12	47.7	8.76	1.3e-15	8	11	35.5	7.18	1.1e-12	8	10	45.2	8.56	3e-15	10	12	47.7	8.62	2.4e-15	5	7	26.5	7.48	3e-13	10	12	47.7	9	4.6e-16	9	12	45.2	9.14	2.5e-16	8	11	45.2	8.45	4.8e-15	7	10	36.8	8.25	1.2e-14	8	11
[1365]		WP_038966058.1	10	12	35.5	6.71	8.2e-12	11	14	34.4	7.24	8.5e-13	11	13	34.7	7.84	6.5e-14	11	12	37.5	7.39	4.4e-13	7	8	27.5	7.58	2e-13	10	11	39.3	7.35	5.3e-13	8	11	32.1	7.76	9.1e-14	5	6	19.5	7.15	1.2e-12	12	13	42.1	7.34	5.6e-13	10	12
[1366]		WP_011083622.1	9	13	49.7	8.2	1.4e-14	5	6	27.5	7.92	4.6e-14	7	9	38.1	8.53	3.5e-15	7	8	38.1	7.85	6.2e-14	7	7	38.1	7.21	9.5e-13	8	9	49.7	8.62	2.3e-15	9	11	49.7	8.89	7.5e-16	9	12	38.1	8.95	5.8e-16	10	11	49.7	7.97	3.8e-14	7	8
[1367]		WP_011088034.1	9	10	32.4	7.37	4.9e-13	6	8	23.6	8.02	3e-14	7	7	26.8	8.72	1.5e-15	7	8	26.2	6.89	3.7e-12	3	3	12.2	6.67	6.3e-12	6	6	25.9	6.67	9.5e-12	8	9	32.4	9.79	1.6e-17	9	11	32.9	8.63	2.3e-15	8	9	32.4	9.16	2.3e-16	7	7
[1368]		WP_011089528.1	8	8	16.6	8.29	9.4e-15	11	12	25	9.51	5.2e-17	7	7	14.9	7.74	9.9e-14	10	11	25.2	6.15	4.5e-11	10	10	23.3	8.77	6.8e-16	8	8	19.7	6.26	5.4e-11	9	10	20.6	8.63	2.3e-15	10	10	23.9	8.65	2.1e-15	8	8	21.6	6.54	1.7e-11	9	9
[1369]		WP_011090554.1	8	8	27.2	9.98	7.2e-18	10	11	27.2	8.7	1.7e-15	7	8	24.8	7.77	8.7e-14	9	11	25.5	11.15	4.8e-20	7	9	23.4	7.23	8.8e-13	10	13	28.8	8.32	8.5e-15	8	10	27.2	11.06	7.1e-20	8	10	27.2	9.1	3e-16	6	7	17.3	9.14	2.5e-16	10	12
[1370]		WP_011084030.1	8	8	23.6	6.67	9.6e-12	7	7	16.9	6.77	6.3e-12	8	8	23.6	8.21	1.4e-14	11	11	30.8	8.34	7.9e-15	7	7	18.4	7.07	1.8e-12	8	8	22.9	8.95	5.7e-16	9	9	24	7.16	1.2e-12	8	8	22.1	7.7	1.2e-13	6	6	17.2	7.65	1.5e-13	6	6
[1371]		WP_011085385.1	8	8	5	3.69	1.6e-08	14	14	7.7	7.17	1.2e-12	10	10	5.7	7.76	4.3e-14	9	9	5.1	6.35	5.5e-13	4	4	2	2.48	5.5e-08	8	8	4.8	4.48	1.6e-10	7	7	4	2.42	3.7e-07	2	2	1.4	2.04	1.1e-06	12	12	6.9	6.89	5.4e-13	14	14
[1372]		WP_028171750.1	10	19	61.5	12.74	5.5e-23	8	9	43.3	8.01	3.2e-14	9	11	43.9	7.25	7.9e-13	6	7	36.4	7.65	1.5e-13	7	10	43.3	9.05	3.8e-16	7	8	31.6	6.43	2.6e-11	9	12	47.6	7.47	3.1e-13	9	11	43.9	8.09	2.2e-14	9	12	43.9	7.84	6.4e-14	10	10
[1373]		WP_011088050.1	10	11	38.9	8.4	6e-15	6	7	25.6	8.59	2.6e-15	7	8	35	8.8	1.1e-15	9	10	50	8.39	6.2e-15	9	9	52.1	8.24	1.2e-14	9	11	48.7	8.96	5.5e-16	6	7	25.6	6.93	3.2e-12	8	9	50	9.22	1.8e-16	7	7	38.5	7.94	4.3e-14	10	12
[1374]		WP_097532308.1	13	14	37.8	6.04	4e-11	11	12	25.9	6.27	5.3e-11	13	13	27.7	6.87	4.1e-12	13	14	29.8	6.69	8.3e-12	13	13	37.3	7.54	2.3e-13	14	15	33.2	5.82	4.3e-11	13	14	35.8	8.08	2.4e-14	9	10	26.7	6.43	2.7e-11	13	15	31.6	6.69	9e-12	11	12
[1375]		WP_011089506.1	10	10	9.8	6.88	4.6e-13	14	15	16.2	6.63	7.3e-12	11	11	13.2	6.03	6.9e-12	10	11	11.1	4.6	2.5e-09	13	13	14.4	3.96	6.2e-10	10	10	11.9	9.14	2.5e-16	11	11	11.5	3.8	9.5e-09	8	8	8.7	5.28	2.1e-10	12	12	11.8	5.49	4e-11	11	12
[1376]		WP_011090080.1	9	12	60	10.28	2e-18	6	6	44	10.75	2.7e-19	7	8	44	9.88	1.1e-17	5	5	28	10.51	7.3e-19	6	7	34.9	9.23	1.7e-16	7	8	44	9.87	1.1e-17	5	6	44	5.95	2.1e-10	6	7	44	9.96	7.9e-18	7	8	44	10.16	3.3e-18	7	7
[1377]		WP_038965798.1	10	11	21.1	6.3	4.6e-11	10	11	19.9	7.61	8.6e-14	11	11	27.6	7.43	3.7e-13	10	10	24.1	7.15	1.3e-12	3	3	8	3.83	4.6e-09	6	6	14.3	2.68	4.9e-06	7	7	17.9	4.08	5.3e-09	7	7	16.9	2.6	6.9e-06	8	8	15.5	6.05	7.4e-11	8	8
[1378]		WP_011085225.1	10	13	39.6	9.41	8.2e-17	7	10	23.8	8.5	3.9e-15	7	8	23.8	10.94	1.2e-19	6	7	18.6	7.52	2.6e-13	10	11	32.7	8.11	2.1e-14	10	12	39.3	8.13	1.9e-14	9	11	33.8	6.34	4e-11	9	12	26.3	8.2	1.4e-14	8	10	28.5	7.1	1.5e-12	9	11
[1379]		WP_011088462.1	9	12	43.7	5.55	1.1e-09	9	11	52.9	6	1.7e-10	6	8	45.4	5.61	8.7e-10	5	5	42	6.34	4e-11	7	8	45.4	5.33	1.1e-09	7	8	43.7	5.6	9.1e-10	8	9	45.4	5.77	4.4e-10	7	8	45.4	5.81	3.8e-10	13	16	58.8	5.72	5.5e-10	9	10
[1380]		WP_038965847.1	6	7	24	9.1	3e-16	9	10	35.6	7.99	3.4e-14	10	10	41	8.52	3.7e-15	5	5	18.3	3.89	2.6e-08	4	4	16.7	8.07	2.5e-14	8	9	34.4	7.54	4.9e-14	7	8	31.9	8.39	6.4e-15	7	8	30.9	12.78	4.7e-23	8	10	37.9	10.89	1.4e-19	7	8
[1381]		WP_011085058.1	9	9	20.5	7.37	4.9e-13	12	14	29.1	6.7	8.5e-12	10	11	22	6.94	3e-12	9	9	20.7	5.99	1.7e-10	5	5	12.2	5.43	1.3e-09	3	3	7.5	5.99	1.7e-10	7	7	15.9	6.75	6.8e-12	8	8	18.5	6.6	1.3e-11	10	11	23.4	6.45	2.5e-11	8	8
[1382]		WP_011084087.1	10	10	37.2	7.63	1.6e-13	8	8	30	5.99	1.7e-10	8	8	35.2	6.87	4.1e-12	7	7	24.5	5.4	7.1e-10	5	5	26.2	2.91	1.3e-07	7	7	31	7.21	9.8e-13	9	9	36.6	6.84	4.7e-12	9	9	33.4	7.03	2e-12	9	9	34.8	7.74	1e-13	7	7
[1383]		WP_011083178.1	8	8	19.6	8.47	4.4e-15	12	12	26.6	6.35	3.7e-11	9	10	22.7	7.67	4.9e-14	12	13	27.1	6.38	3.2e-11	7	7	16.2	5	2.3e-10	11	11	23.2	7.92	1.6e-14	10	10	24	7.55	2.2e-13	9	9	20.1	7.81	7.3e-14	12	12	24.2	9.5	5.4e-17	9	9
[1384]		WP_011087152.1	12	13	38.1	7.97	3.7e-14	6	6	19.1	7.16	1.2e-12	7	7	21.3	7.29	6.7e-13	5	5	18.3	5.96	2e-10	8	8	28.9	4.42	1.7e-08	7	8	25.9	7.07	1.7e-12	9	10	31.3	7.18	1.1e-12	10	12	35.9	7.4	4.2e-13	13	15	42.5	7.4	4.2e-13	7	7
[1385]		WP_011088518.1	6	7	16.6	5.44	1.3e-09	11	13	22	9.18	2.2e-16	9	13	24.1	6.59	1.3e-11	12	13	26.2	7.56	2.2e-13	4	4	10.3	4.94	3.6e-09	4	5	7	5.31	3.1e-09	4	4	11.2	5.07	8.8e-09	5	6	10	4.86	2.2e-08	6	7	16.8	6.3	4.6e-11	11	12
[1386]		WP_011085246.1	10	12	45	7.88	5.5e-14	7	7	30.4	7.33	5.7e-13	7	8	45	7.52	2.5e-13	6	6	45.6	7.73	1e-13	5	5	30.4	7.51	2.6e-13	6	6	37.4	5.43	8.4e-10	7	9	35.7	7.64	1.5e-13	9	10	45	7.91	4.8e-14	8	9	45	5.63	7.9e-10	9	10
[1387]		WP_011087622.1	7	8	30	11.36	2e-20	5	7	19.1	8.03	2.9e-14	6	8	24.5	11.07	6.9e-20	8	8	29	9.5	5.5e-17	3	3	9.4	6.52	1.2e-11	7	10	30	9.31	1.2e-16	9	12	34.2	11.66	5.4e-21	7	8	28.7	11.49	1.1e-20	6	7	18.5	8.04	2.8e-14	7	9
[1388]		WP_038967579.1	10	11	42.2	7.5	2.7e-13	7	7	32.1	6.46	2.3e-11	8	8	33.2	6.77	6.2e-12	9	9	38	6.91	3.5e-12	9	9	43	8.03	2.9e-14	9	9	34.8	6.83	4.9e-12	10	11	43.3	6.96	2.8e-12	10	10	43	8.07	2.4e-14	6	6	21.4	5.8	3.9e-10	5	5
[1389]		WP_011088279.1	8	8	23.6	7.47	3.2e-13	8	9	28.5	6.28	5.2e-11	9	9	30.3	7.41	4e-13	11	12	38.7	7.31	6.4e-13	6	6	20.6	5.9	8.2e-11	10	10	34	7.22	7.4e-14	8	8	25.1	8.32	8.5e-15	11	11	33	6.99	6.8e-13	8	8	24.1	7.66	1.4e-13	8	8
[1390]		WP_011083656.1	9	10	44.5	10.66	4e-19	5	6	18.3	6.77	6.3e-12	6	7	22.9	6.73	7.3e-12	4	5	18.3	6.59	1.4e-11	4	5	19.7	6.4	1.1e-11	8	9	40.8	12.8	4.3e-23	8	9	36.7	7.1	1.5e-12	6	8	22.9	7.39	4.5e-13	9	10	36.7	6.37	3.5e-11	6	7
[1391]		WP_011084191.1	9	9	26	7.99	3.5e-14	6	6	17.6	5.8	1.1e-10	9	9	26	7.87	5.7e-14	10	10	32.9	6.44	8.6e-12	3	3	9.8	3.4	9e-09	7	7	22.1	8.16	1.6e-14	4	4	12.9	6.21	5.2e-11	6	6	20	6.01	1.4e-11	11	11	36.2	8.57	2.9e-15	6	6
[1392]		WP_011089914.1	10	10	27.4	9.09	3.1e-16	9	11	18.8	7.8	7.7e-14	8	8	22.5	6.91	3.4e-12	8	9	19.4	7.15	1.3e-12	7	8	16.1	7.25	8.3e-13	9	11	19.4	7.47	3.2e-13	11	11	26.4	7.49	2.9e-13	9	9	24.8	7.61	1.8e-13	11	11	29.3	7.67	1.3e-13	7	8
[1393]		WP_038967956.1	8	10	21.8	8.23	1.2e-14	7	8	25.9	7.74	1e-13	6	7	18.5	7.47	3.1e-13	7	9	16.7	7.54	2.4e-13	7	7	16.7	8.75	1.4e-15	9	11	26.2	9.17	2.2e-16	8	10	21.8	8.94	6e-16	8	10	26.2	8.53	3.4e-15	7	9	18.5	8.33	7.9e-15	8	9
[1394]		WP_011087526.1	10	10	32.1	6.04	1e-10	8	9	24.9	7.49	2.9e-13	7	7	25.4	6.98	2.5e-12	8	9	24.1	6.56	1.5e-11	8	8	22.6	3.8	3e-09	8	10	20.1	5.64	9e-11	10	10	29.1	5.88	2.8e-10	10	11	32.1	7.71	1.1e-13	12	12	34.1	7.47	3.2e-13	9	9
[1395]		WP_011086911.1	4	4	12.2	7.2	1e-12	6	6	20.3	7.44	3.7e-13	4	4	14.4	7.24	8.5e-13	11	11	35.8	5.95	8.9e-11	6	6	21.6	3.41	9.7e-09	10	10	32.4	6.3	1.5e-12	6	7	17.1	7.73	1e-13	9	9	30	8.01	3.1e-14	9	9	29.1	8.29	9.6e-15	5	5
[1396]		WP_011088192.1	10	11	47.1	7.85	6.3e-14	4	4	17.2	4.27	6.1e-09	6	6	35.2	7.7	1.2e-13	6	6	34.1	8.51	3.7e-15	8	8	40.2	8.15	1.7e-14	9	9	38.3	6.91	3.4e-12	7	7	34.1	8.31	8.8e-15	8	9	47.1	7.19	1e-12	10	11	46	6.47	2.3e-11	8	8
[1397]		WP_011086584.1	7	8	10.6	10.1	4.2e-18	11	12	19.8	9.3	1.3e-16	7	8	11.2	10.24	2.3e-18	8	9	10.4	5.94	2.2e-10	11	12	18.4	6.43	2.6e-11	8	9	14.2	6.69	8.9e-12	9	10	12.6	6.89	3.8e-12	8	9	11.8	6.11	6.8e-11	6	7	10.6	9.6	3.5e-17	7	8
[1397-1]	7	WP_063921615.1	2	3	3.5	6.04	4.8e-11	4	5	6.6	6.15	4.3e-11	3	4	6.3	6.46	1.3e-11	7	8	12.8	6.29	3.1e-11	5	5	8.7	3.67	1.9e-09	5	7	9	9.03	4e-16	6	7	10.6	8.24	1.2e-14	5	6	9	8.43	5.3e-15	4	5	6.6	6.59	1.3e-11	4	5
[1397-2]	1	decoy	1	1	0.9	0.04	0.0013	1	1	0.9	1.14	0.00022	1	1	0.9	0.16	0.00082	1	1	0.9	1.01	0.00035	1	1	0.9	0.86	0.00025	1	1	0.9	1.18	0.00022	1	1	0.9	0.54	0.00037	1	1	0.9	0.14	0.00087	1	1	0.9	0.69	0.00077	2	2
[1398]		WP_011089748.1	10	12	38.9	8.03	2.9e-14	9	9	36.1	8.38	6.5e-15	7	8	25.3	8.37	6.7e-15	10	11	34.2	8.83	9.6e-16	11	12	41.5	7.61	1.7e-13	11	14	40.2	8.04	2.8e-14	10	12	38.9	8.48	4.2e-15	9	11	36.1	8.35	7.3e-15	9	9	32.9	8.34	7.7e-15	10	10
[1399]		WP_028174623.1	11	11	40.5	7.29	6.9e-13	10	10	39.7	5.97	1.9e-10	10	10	37.6	5.55	1.1e-09	7	7	23.2	6.41	1.9e-11	10	10	35.9	5.05	3.6e-10	9	9	34.2	8.69	1.8e-15	12	12	40.1	7.92	4.7e-14	11	11	40.1	7.81	7.5e-14	9	9	40.5	6.03	1.5e-10	9	9
[1400]		WP_011085805.1	8	10	20	5.7	6.1e-10	8	10	20	7.5	2.8e-13	10	13	31.3	7.56	2.2e-13	8	13	24.9	5.75	4.8e-10	7	7	31	5.98	1.8e-10	10	13	30.3	6.38	3.3e-11	12	15	36.2	6.9	3.6e-12	11	15	30.3	6.52	1.8e-11	9	13	24.1	7.63	1.6e-13	9	12
[1401]		WP_011084020.1	13	13	39.1	6.17	8e-11	11	12	25.2	5.37	2.4e-09	11	12	30	5.15	6.4e-09	10	11	31.7	3.28	1.6e-07	9	9	33.1	5.63	2.6e-10	11	12	33.7	5.85	3.2e-10	10	11	33.4	6.53	1.7e-11	14	15	37.7	5.75	4.8e-10	7	7	23.8	5.87	2.9e-10	6	6
[1402]		WP_011088905.1	10	14	37.6	8.76	1.3e-15	11	15	39.5	7.44	3.7e-13	11	13	39.2	9.41	8e-17	8	9	26.7	5.6	1.4e-11	5	5	18.6	8.46	1.4e-15	8	9	27	4.87	7.8e-10	12	13	42.1	6.86	4.3e-12	10	12	39.9	8.98	5e-16	8	12	31.8	8.82	1e-15	7	8
[1403]		WP_011089515.1	5	5	7.4	6.43	3.3e-12	11	12	16.3	8.06	2.6e-14	6	7	8.2	6.79	5.8e-12	9	10	13.2	4.63	7e-10	6	7	7.1	3.59	2.5e-08	10	12	14.1	5.11	2.1e-09	11	12	16.6	5.9	8.2e-11	15	16	22.8	6.11	5.2e-11	11	12	12.9	7.2	1e-12	7	8
[1403-1]	1	decoy	1	1	1.5	-0.15	0.00026	1	1	1.5	1.25	2e-05	1	1	1.5	-0.28	0.0019	1	1	1.5	0.97	4e-05	2	2	5.2	0	0.00044	1	1	1.5	0.58	9.7e-05	1	1	1.5	-0.03	0.00064	1	1	1.5	0.43	0.00019	1	1	1.5	0.32	0.00065	1	1
[1404]		WP_231166584.1	10	10	16.7	8.51	3.7e-15	12	12	18.3	7.69	1.2e-13	8	8	11.5	5.97	2.7e-11	6	6	11.4	3.71	2.8e-08	5	5	8.7	3.56	3.1e-08	5	5	9.8	1.89	2.6e-06	4	4	7	1.99	1.7e-06	4	4	7	1.28	2.5e-05	13	13	19.2	6.69	1.9e-12	7	7
[1405]		WP_011089508.1	9	9	16.5	10.77	2.4e-19	13	13	19.7	8.29	1.8e-15	9	9	15.3	11.34	2.1e-20	8	8	13.2	10.95	1.1e-19	6	6	9.8	5.63	1.1e-11	7	7	14.6	6.81	4.9e-13	8	8	15	9.28	1.4e-16	8	8	15.3	3.2	1e-07	10	10	17.8	10.08	4.6e-18	10	10
[1406]		WP_011086056.1	8	8	23.4	8.26	1.1e-14	9	9	27.1	8.61	2.4e-15	9	10	29.1	8.5	4e-15	8	8	23.4	9.16	2.4e-16	7	7	20.6	8.78	1.2e-15	10	10	32.6	8.68	1.8e-15	12	12	39.2	7.99	3.4e-14	6	6	20	9.1	3.1e-16	10	10	27.3	9.29	1.3e-16	9	9
[1407]		WP_011083781.1	10	10	30.9	7.7	1.2e-13	10	10	34	6.63	1.1e-11	6	6	19.2	6.95	2.9e-12	9	9	24.1	6.01	1.6e-10	8	8	31.6	6.12	5.4e-11	11	11	34	8.47	4.4e-15	10	10	34	8.76	1.3e-15	9	9	31.3	7.49	3e-13	8	8	25.8	6.64	7.4e-12	10	10
[1408]		WP_011089812.1	10	15	47.3	10.53	6.8e-19	8	10	46.4	7.11	1.5e-12	5	7	39.1	6.81	5.3e-12	8	9	46.4	6.54	1.7e-11	7	10	46.4	6.21	6.9e-11	6	8	45.5	10.11	4.2e-18	9	12	47.3	9.54	4.5e-17	10	12	47.3	9.54	4.6e-17	10	14	47.3	9.09	3.1e-16	8	11
[1409]		WP_011083540.1	8	8	43.9	6.77	6.2e-12	7	7	42.2	6.56	1.5e-11	8	9	37.8	11.57	8e-21	5	6	30.9	7.09	3.9e-13	7	8	33.9	5.46	1e-09	8	10	43.9	11.98	1.4e-21	8	9	47.4	6.87	4e-12	9	10	39.1	12.36	2.8e-22	10	11	47.8	9.51	5.2e-17	5	7
[1410]		WP_011085752.1	9	9	27	9.04	3.9e-16	8	8	23	8.82	1e-15	11	11	34.2	9.5	5.4e-17	10	10	29.1	6.17	2.9e-12	5	5	14.8	1.61	2.4e-06	8	8	24.8	5.23	4.8e-11	10	11	31.1	8.14	1.8e-14	6	6	14.3	8.18	7.7e-15	9	9	23.4	9.69	2.4e-17	8	8
[1411]		WP_011083464.1	11	13	29	8.43	4.5e-15	8	10	39.4	8.72	1.5e-15	9	10	45.2	12.91	2.6e-23	8	8	44.8	9.6	3.6e-17	7	8	33.3	10.54	6.6e-19	9	10	27.2	13.25	6.4e-24	7	7	29.7	8.49	4.1e-15	6	8	17.6	6	1.6e-10	9	10	23.7	9.02	4.2e-16	10	11
[1412]		WP_011086915.1	9	9	15.3	5.85	2.2e-10	11	12	24.4	5.74	3.5e-10	10	10	18.1	5.35	2.6e-09	6	6	13	7.55	2.2e-13	10	10	21	6.64	1.1e-11	9	10	24.8	6.68	9e-12	8	9	18.7	6.17	8.2e-11	13	13	24	5.8	3.5e-10	10	10	22.4	4.66	5.9e-09	7	7
[1413]		WP_038965709.1	12	14	66.4	9.04	3.9e-16	10	11	44.2	4.71	4.4e-09	8	9	35.4	8.94	6.1e-16	10	12	45.6	9.35	1.1e-16	11	11	43.8	5.99	1.7e-10	11	12	45.6	6.87	4.1e-12	9	10	42	4.2	2.2e-08	8	9	41.2	6.07	1.1e-10	12	13	52.7	9.05	3.7e-16	9	10
[1414]		WP_011087375.1	11	14	35.9	8.34	7.8e-15	8	10	36.2	6.51	1.9e-11	9	9	36.9	6.73	7.5e-12	10	11	35.9	6.81	5.2e-12	8	8	29.8	5.58	3.5e-10	10	10	39.2	6.05	1.4e-10	5	5	19.7	6.24	6.1e-11	9	9	36.9	6.79	5.8e-12	9	12	35.6	7.04	2e-12	9	11
[1415]		WP_011090210.1	11	12	25.6	6.18	7.9e-11	10	10	25.4	6.75	6.9e-12	7	7	19.2	4.22	7.7e-09	8	8	14.3	4.43	3.8e-09	7	7	13.9	5	5.9e-09	10	10	24	5.45	4.2e-10	7	7	14.5	5.36	2.5e-09	8	9	19.8	5.83	3.4e-10	13	14	38.3	5.92	2.3e-10	10	10
[1416]		WP_011087415.1	8	11	43	12.27	4.1e-22	7	9	48.3	12.23	4.8e-22	9	11	54.4	7.18	1.1e-12	7	10	49.7	6.48	2.2e-11	5	6	42.3	6.51	4.1e-12	4	5	40.3	8.48	4.2e-15	6	7	43	9.41	8.2e-17	6	7	43	8.08	2.3e-14	8	10	50.3	8.8	1.1e-15	7	9
[1417]		WP_011084980.1	10	11	31.5	6.74	7e-12	7	8	33.3	6.46	2.4e-11	11	12	42.4	5.26	3.9e-09	7	7	23.6	7.76	9.1e-14	8	9	28.6	5.4	3.4e-11	11	12	40.9	7.56	2.1e-13	11	13	39.1	6.4	3e-11	9	11	34.8	6.76	6.4e-12	9	11	37	7.14	1.3e-12	12	13
[1418]		WP_011090544.1	8	8	20.7	7.79	8.1e-14	10	11	23	5.95	6.7e-11	10	12	24.5	7.21	9.8e-13	10	13	23.2	8.74	1.4e-15	7	8	16.4	5.69	9.4e-11	11	13	26.4	8.55	3.2e-15	10	11	21.8	4.96	3.8e-09	9	11	19.6	7.36	5.1e-13	9	10	22	6.65	1.1e-11	11	13
[1419]		WP_011088022.1	11	12	37.2	6.48	2.1e-11	6	7	23.3	6.54	1.6e-11	11	13	41.3	6.18	7.9e-11	8	8	34	7.82	7.2e-14	8	8	34	5.51	1.3e-09	9	10	34.4	8.81	1e-15	9	10	35.1	6.62	1.2e-11	10	12	35.1	8.82	1e-15	7	8	27.4	6.15	8.8e-11	5	6
[1420]		WP_028170959.1	9	9	30.9	6.84	4.5e-12	8	8	24.3	7.7	1.2e-13	10	12	30.9	8.45	4.9e-15	10	11	30.9	6.7	5e-12	7	7	21.6	6.34	3.8e-11	9	9	24	6.24	4.1e-11	9	9	26.2	6.92	3.3e-12	10	10	30.9	7.09	1.6e-12	8	8	25.4	8.13	1.9e-14	8	9
[1421]		WP_038967397.1	6	9	47.5	9.41	8.2e-17	5	5	39.8	4.22	2e-09	6	7	43.2	8.35	2e-15	9	9	50	9.29	1.4e-16	7	7	33.1	3.16	3.3e-08	10	10	50	9.46	6.5e-17	9	12	50	9.42	7.7e-17	7	9	43.2	9	4.6e-16	7	9	39.8	8.98	5e-16	8	8
[1422]		WP_011089842.1	9	10	22.1	9.44	7.1e-17	8	10	22.1	9.39	8.7e-17	9	10	24.1	9.11	2.9e-16	9	11	22.1	8.61	2.4e-15	9	10	23.8	7.55	2.2e-13	9	10	25.9	8.72	1.5e-15	9	10	22.1	9.4	8.5e-17	8	9	21.5	8.58	2.8e-15	9	10	24.4	9.16	2.4e-16	10	11
[1423]		WP_011090521.1	9	10	50.5	7.7	1.2e-13	4	4	26.4	6.95	2.8e-12	6	7	39	6.83	4.8e-12	8	8	37.4	6.6	1.3e-11	5	5	33	5.64	3e-11	7	8	35.7	6.29	4.8e-11	8	8	45.1	6.88	4e-12	4	5	26.4	6.44	2.6e-11	7	8	38.5	7.29	6.7e-13	5	5
[1424]		WP_011084169.1	8	9	28.2	7.37	3.8e-13	10	11	37.5	8.33	8.2e-15	9	9	30.7	7.34	5.5e-13	7	7	26.3	7.79	8.1e-14	8	9	29.7	7.28	7.2e-13	9	10	30.3	7.27	7.3e-13	10	10	37.5	7.34	5.5e-13	11	12	45.5	7.93	4.5e-14	8	8	28.2	7.32	5.9e-13	9	10
[1425]		WP_008141931.1	9	25	82.6	10.36	1.4e-18	5	10	62.3	9.2	2e-16	6	10	72.5	8.79	1.1e-15	4	9	47.8	10.57	5.7e-19	6	9	63.8	11.13	5.3e-20	6	10	63.8	8.8	1.1e-15	5	9	63.8	10.9	1.4e-19	7	11	72.5	9.33	1.1e-16	7	21	72.5	10.85	1.8e-19	7	16
[1425-1]	7	WP_011084262.1	6	17	52.9	9.98	7e-18	5	8	52.9	10.56	6.1e-19	5	10	52.9	10.51	7.6e-19	5	8	52.9	10.33	1.6e-18	5	6	44.3	3.66	7.2e-08	4	6	47.1	10.36	1.4e-18	3	7	45.7	11	9.3e-20	4	7	51.4	8.89	7.4e-16	6	16	52.9	10.95	1.2e-19	6	12
[1425-2, 1878-1]	4	WP_008129967.1	4	11	72.1	8.85	8.7e-16	4	7	75	7.58	2e-13	5	8	75	8.84	9.1e-16	4	7	72.1	5.79	2.9e-10	2	3	25	3.66	7.2e-08	3	5	54.4	3.12	1.6e-07	4	7	72.1	5.91	9.8e-12	5	8	75	5.78	7.8e-11	5	12	75	9.02	4.4e-16	5	9
[1426]		WP_011087469.1	8	9	33.6	7.17	1.1e-12	7	9	22.8	7.77	8.8e-14	9	11	33.6	7.7	1.2e-13	8	10	30	8.23	1.2e-14	9	10	33.6	7.86	6.1e-14	7	12	33.2	7.92	4.6e-14	8	11	33.2	7.18	1.1e-12	8	11	33.6	8.22	1.3e-14	8	11	33.6	7.68	1.3e-13	7	10
[1427]		WP_011084247.1	12	12	52.8	7.36	5.1e-13	9	9	43.3	6.31	4.5e-11	13	14	53.5	7.09	1.6e-12	11	11	46.8	6.42	1.4e-11	11	11	48.6	3.58	9.2e-09	13	13	58.8	7.01	2.2e-12	8	8	37.3	5.77	4.5e-10	11	12	53.2	6.39	3.2e-11	9	11	40.8	6.51	1.9e-11	9	9
[1428]		WP_028172291.1	10	12	37.8	6.84	4.6e-12	8	9	32.9	6.25	5.2e-11	9	11	49.3	6.59	1.3e-11	6	6	28.3	5.37	1.6e-09	6	7	25.5	3.71	3.6e-08	8	8	33.2	5.66	3.4e-10	9	10	37.8	6.66	1e-11	9	11	43.7	6.99	2.5e-12	9	11	33.9	6.16	8.3e-11	9	10
[1429]		WP_011083176.1	10	12	31.4	10.21	2.7e-18	5	7	15.1	6.17	8.2e-11	9	11	34	8.83	9.6e-16	8	9	28.3	9	4.6e-16	11	12	34	9.03	4e-16	7	8	18.6	7.07	1.7e-12	8	12	28	8.59	2.7e-15	8	11	28	8.99	4.8e-16	9	14	28.3	8.69	1.8e-15	8	8
[1430]		WP_011089475.1	8	8	25.2	8.27	1e-14	8	8	23.9	7.47	3.2e-13	9	9	33.3	7.86	6e-14	7	7	29.1	6.24	6.1e-11	2	2	9.4	3.51	2.2e-08	5	5	22.3	6.48	1.7e-12	4	4	16.2	6.6	1.3e-11	4	4	16.2	6.45	8.2e-12	10	11	39.8	7.78	8.6e-14	9	9
[1431]		WP_011085115.1	9	10	20.5	7.18	1.1e-12	9	10	19.6	7.57	2e-13	9	11	21.9	3.88	2.7e-07	13	14	25.1	6.16	8.6e-11	7	7	12.9	5.49	8.3e-11	10	11	17.7	7.27	7.3e-13	10	11	21	7.37	4.8e-13	9	11	19.4	7.2	1e-12	9	11	22.8	6.64	1.1e-11	11	13
[1432]		WP_028174812.1	8	9	30.5	6.72	7.7e-12	10	11	39.7	7.65	1.5e-13	10	11	39.7	7.83	6.8e-14	9	9	26.2	7.08	1.6e-12	6	6	20.6	7.2	9.9e-13	9	9	30.9	7.09	1.6e-12	9	9	35.5	6.87	4e-12	8	9	30.5	7.98	3.6e-14	8	8	34	7.39	4.5e-13	9	10
[1433]		WP_049832616.1	8	8	26.9	10.09	4.5e-18	10	10	29.2	8.97	5.2e-16	6	6	17.5	9.07	3.4e-16	10	11	27.9	10.22	2.5e-18	8	9	22.1	6.18	6.1e-12	11	11	30	10.39	1.3e-18	8	8	24	9.2	2e-16	10	10	29.2	9.69	2.4e-17	7	7	21.9	11.1	5.9e-20	9	9
[1434]		WP_011088414.1	12	16	46.9	8.48	4.3e-15	7	8	30.8	6.11	1e-10	9	13	40	8.5	3.8e-15	7	8	38.1	7.1	6.6e-13	5	5	18.1	4.97	5.3e-09	6	8	16.9	5.63	8e-10	8	12	37.3	8.14	1.8e-14	11	15	38.1	6.58	1.4e-11	8	11	38.1	9.5	5.5e-17	6	6
[1435]		WP_011087052.1	9	19	78.5	9.03	4.2e-16	4	4	39.3	8.82	9.9e-16	7	10	60	10.52	7.1e-19	6	7	60	8.86	8.4e-16	4	5	51.1	7.51	2.7e-13	6	8	51.9	12.25	4.5e-22	6	7	57	11.35	2e-20	8	11	78.5	10.28	2e-18	7	10	70.4	12.14	7.1e-22	6	8
[1436]		WP_011089811.1	10	10	41.3	9.16	2.3e-16	2	2	7.2	4.58	4.4e-09	6	6	32.9	8.84	9.3e-16	3	3	22.2	6.46	2.4e-11	4	4	22.2	5.77	2.3e-10	6	6	36.5	6.31	2.8e-11	7	7	32.9	8.41	5.7e-15	6	6	31.7	5.66	1.1e-10	7	7	32.9	7.95	4.1e-14	7	7
[1437]		WP_011086588.1	12	13	29.7	8.09	2.2e-14	4	4	15.5	8.19	1.5e-14	7	8	16.1	8.91	6.8e-16	6	6	19.4	5.18	6.8e-11	7	7	19.4	7.96	3.9e-14	9	11	22.6	8.52	3.6e-15	7	8	22.3	7.72	1.1e-13	7	8	22.6	8.69	1.8e-15	6	7	15.5	8.56	3e-15	6	6
[1438]		WP_011088796.1	11	13	41.4	7.55	2.2e-13	10	10	36.6	5.41	3.9e-10	9	10	42.9	7.18	1.1e-12	9	10	39.6	6.14	9.1e-11	6	7	26.5	4.25	1.5e-08	12	13	51.9	6.41	3e-11	11	12	40.7	7.03	2.1e-12	11	12	39.6	6.58	1.4e-11	11	11	48.1	6.27	1e-11	10	11
[1439]		WP_038967751.1	10	10	29.5	6.98	2.6e-12	10	10	28.5	7.31	6.4e-13	11	12	30.2	8.16	1.7e-14	11	11	37.2	6.99	2.4e-12	9	9	26.6	5.89	2.7e-10	13	13	39.6	6.79	5.8e-12	9	9	29.5	6.03	1.4e-10	7	7	15.1	7.19	1.1e-12	8	8	20.6	5.87	2.9e-10	8	10
[1440]		WP_011089683.1	7	7	17.5	5.98	1.8e-10	11	11	31.1	6.24	5.9e-11	12	13	34.8	4.78	7.2e-09	10	10	27.5	7.23	8.6e-13	9	9	22.5	4.86	2.6e-10	10	10	28.6	7.19	1e-12	12	12	30.9	5.95	2.1e-10	12	12	34.1	6.29	4.7e-11	10	11	25.5	5.8	2.7e-10	10	10
[1441]		WP_028175937.1	8	8	20.5	7.78	8.3e-14	9	11	23.3	8.53	3.4e-15	11	13	26.3	8.33	8.2e-15	6	6	18.3	8.23	1.2e-14	7	7	19.6	7.9	5.1e-14	9	10	22.8	7.85	6.2e-14	8	8	20.5	8.39	6.4e-15	5	5	14.6	8.19	1.5e-14	10	10	23.3	7.71	1.1e-13	8	8
[1442]		WP_038967571.1	7	9	21.7	7.72	1.1e-13	9	11	25.7	7.95	4.1e-14	11	13	24.6	7.37	4.8e-13	9	9	21.7	9.2	2e-16	8	9	25.4	5.18	1.5e-10	11	11	30.4	6.82	5e-12	8	10	24.3	7.96	3.9e-14	7	8	23.5	7.85	6.2e-14	10	12	25.9	7.36	5e-13	8	8
[1443]		WP_008567674.1	8	10	70.2	7.65	1.5e-13	3	3	23.7	2.11	1.7e-06	3	3	37.4	8.13	1.9e-14	3	3	37.4	7.89	5.3e-14	2	2	27.5	0.45	9.6e-05	2	2	27.5	7.69	1.2e-13	6	6	41.2	4.46	1.3e-08	4	4	23.7	6.72	7.7e-12	3	3	22.1	5.1	1.9e-09	1	1
[1444]		WP_011083824.1	10	10	20.6	6.53	1.7e-11	7	7	14.5	6.27	2.7e-11	8	8	16.6	7.43	3.7e-13	11	11	23.4	6.71	2.7e-12	2	2	3.8	2.33	1e-06	5	5	9.8	3.4	3.3e-08	5	5	10.1	5.99	5.3e-12	5	5	10.1	4.5	7.9e-10	7	7	15.4	6.64	5.7e-12	8	8
[1445]		WP_038967488.1	8	11	37.8	8.98	5.1e-16	4	5	18.9	8.1	2.1e-14	8	11	36.8	8.52	3.5e-15	3	5	30.8	8.63	2.2e-15	5	5	34.6	7.78	8.4e-14	3	5	31.4	8.72	1.5e-15	7	8	36.8	8.99	4.9e-16	5	8	24.3	9.12	2.8e-16	6	9	36.8	8.25	1.1e-14	6	8
[1446]		WP_038965459.1	12	14	46.5	8.49	4.2e-15	9	9	29.8	7.18	2.4e-13	6	6	29.5	5.63	8.2e-11	4	4	11.2	3.39	4.7e-08	6	6	21.6	5.41	1.1e-11	6	6	25.5	5.92	7.6e-12	8	8	31.9	7.05	4.9e-13	9	10	31	6.22	7.5e-12	10	12	39.5	9.38	9.3e-17	8	10
[1447]		WP_011090456.1	10	11	39.2	7.38	4.6e-13	8	8	30	5.87	2.9e-10	10	11	42.7	8.21	1.3e-14	9	10	32.7	6.19	7.4e-11	6	7	24.6	5.6	1.6e-10	7	8	29.2	6.24	6e-11	9	11	30	6.65	1e-11	9	10	38.1	6.94	3.1e-12	9	11	36.9	5.48	3.5e-10	10	10
[1448]		WP_011087458.1	10	10	25.4	6.64	1.1e-11	10	12	27.6	7.22	9e-13	9	10	27.3	7.57	2.1e-13	10	12	27.3	7.08	1.7e-12	10	10	26	5.47	2.6e-11	12	14	32.8	7.45	3.4e-13	11	12	31.4	6.17	8.1e-11	9	10	22.7	7.52	2.6e-13	10	10	27.9	7.66	1.4e-13	10	12
[1449]		WP_038965670.1	10	10	27.9	7.24	8.5e-13	9	10	25.3	7.4	4.3e-13	11	13	30.2	6.87	4.1e-12	8	9	21.9	6.66	1e-11	9	9	23.3	6.07	1.3e-10	9	10	23.9	6.17	8.2e-11	10	10	25.3	6.38	3.4e-11	11	11	30.2	7.37	4.9e-13	11	11	29.8	7.45	3.5e-13	8	8
[1450]		WP_011083550.1	10	12	49.7	7.78	8.5e-14	4	4	30.1	3.96	1.7e-08	7	8	32	4.68	7.3e-09	4	4	30.1	6.32	3.8e-12	4	4	30.1	3.06	2.9e-08	4	4	30.1	4.51	1.2e-09	6	7	30.1	5.55	2.8e-11	7	7	32	6.4	1.8e-12	4	4	22.9	4.55	1.7e-09	4	4
[1451]		WP_011084139.1	9	9	19.9	5.5	4.7e-10	13	14	24.4	6.4	3.1e-11	10	11	20.6	6.85	4.4e-12	13	13	21.9	6.23	4e-12	7	7	13.1	3.74	1.2e-08	10	10	20.9	9.8	1.6e-17	10	11	18.4	6.43	2.7e-11	10	11	19.8	5.93	1.6e-10	9	10	17.3	5.65	1.5e-10	12	12
[1452]		WP_011089417.1	8	9	28.9	9.33	1.1e-16	10	11	32.9	7.21	1.5e-13	10	10	36.5	9.47	6.3e-17	10	11	30.3	5.94	8.1e-11	1	1	2.5	-0.44	0.0025	2	2	6.2	1.56	1e-05	5	5	16.1	4.25	1.8e-09	5	5	16.1	1.86	4.7e-06	9	11	31.4	11.18	4.3e-20	10	11
[1453]		WP_038966697.1	5	6	17.1	5.85	8.1e-11	13	15	30.1	6.74	7e-12	8	9	28.7	7.34	3.5e-13	9	9	28.2	4.4	4.9e-09	6	6	22.9	2.41	1.3e-07	10	10	27.6	5.76	3.7e-10	9	9	23.8	5.37	6e-11	8	8	26	5.35	2e-10	10	11	26.5	5.46	8.5e-11	10	10
[1454]		WP_011088671.1	9	9	29	5.78	4.3e-10	12	12	38	7.19	1.1e-12	10	10	35.1	5.24	3e-09	9	9	28.4	4.76	1.3e-09	9	9	27.8	5.37	1.7e-09	13	13	40	7.24	8.5e-13	10	10	32.5	7.15	1.2e-12	10	10	28.4	4.89	1.5e-09	8	8	31	7.75	9.8e-14	12	13
[1455]		WP_011085136.1	6	6	22.9	6.17	5.5e-13	4	4	11.6	4.34	1.1e-09	8	8	32	8.74	5.3e-16	11	11	37.2	8.58	2.8e-15	6	6	21.8	6.1	1.1e-10	9	9	28.1	5.02	1.4e-10	8	8	32	7.44	1.4e-14	6	6	22.3	5.38	4.6e-11	6	6	22.3	3.6	2.5e-08	8	8
[1456]		WP_028174808.1	9	10	37.1	9.85	1.2e-17	8	9	33.7	7.73	1e-13	7	8	29.5	8.04	2.8e-14	7	8	33.3	7.99	3.4e-14	7	7	33.7	4.98	1.7e-10	7	8	31.1	5.46	1.6e-09	5	6	20.1	5.68	3.4e-10	6	7	27.3	5.05	1.9e-09	7	8	33.7	9.89	1e-17	7	8
[1457]		WP_011086824.1	8	10	32.6	7.01	2.3e-12	7	8	32.6	6.44	2.5e-11	6	7	32.6	5.52	1.9e-10	6	6	24.5	6.36	1.4e-11	6	6	24.5	6.97	1e-12	8	8	32.6	7.11	4.1e-13	9	12	32.6	7.19	1.1e-12	8	10	32.6	6.81	5.2e-12	6	7	22.7	6.77	6.3e-12	7	7
[1458]		WP_011086924.1	8	10	48.4	8.98	5e-16	3	3	15.9	7.63	1.6e-13	8	9	27.5	7.1	1.5e-12	6	7	44	7.12	1.4e-12						4	4	32.4	5.58	1.9e-10	7	8	40.1	8.01	3.2e-14	5	6	27.5	7.54	2.4e-13	6	8	44	6.94	3.1e-12	5	7
[1459]		WP_011089411.1	10	12	47.5	8.01	3.2e-14	6	6	38	7.58	2e-13	7	10	40.8	7.1	1.5e-12	5	6	27.1	6.91	3.4e-12	4	4	23.5	6.36	7.9e-12	8	9	42.7	7.58	2e-13	9	9	44.3	6.95	2.9e-12	8	8	48.2	7.12	1.4e-12	10	12	52.2	7.89	5.3e-14	10	11
[1460]		WP_011090007.1	11	12	45.7	9.07	3.5e-16	7	7	32	8.04	2.8e-14	10	11	37.1	9.01	4.5e-16	10	10	38.8	6.46	2.3e-11	7	7	25.4	5.85	3.1e-10	9	9	32.3	6.23	6.2e-11	8	8	32.6	8.82	1e-15	7	8	26.1	9.11	2.8e-16	10	12	44	8.81	1e-15	6	7
[1461]		WP_011087067.1	10	13	38.4	8.2	1.4e-14	3	3	20	5.66	7.2e-10	6	7	27.1	6.19	7.4e-11	3	3	12.9	3.26	4.6e-08	3	3	18.8	6.12	9.9e-11	5	5	25.5	6.95	2.9e-12	4	4	22.7	6.79	5.8e-12	5	6	26.3	6.58	1.4e-11	6	7	27.1	6.88	3.9e-12	8	8
[1462]		WP_038966693.1	11	15	42.5	6.13	9.8e-11	9	10	34.7	7.36	5.2e-13	12	13	45.2	9.73	2e-17	9	9	37.1	6.68	9.3e-12	7	7	26.6	4.79	3.6e-09	11	13	44.8	7.4	4.3e-13	8	9	28.2	5.5	1.4e-09	9	11	37.8	5.75	4.8e-10	10	12	41.3	8.78	1.2e-15	10	12
[1463]		WP_011085649.1	10	10	48.8	7.38	4.7e-13	6	6	29.4	6.51	4.9e-13	8	8	32.7	7.08	1.6e-12	9	9	33.9	7.74	1.7e-14	6	6	16.9	2.7	9.7e-08	9	9	35.5	7.36	9.1e-14	9	9	49.6	5.79	9.3e-12	6	6	27.4	7.55	2.2e-13	10	10	39.5	7.89	5.2e-14	8	8
[1464]		WP_008554760.1	9	12	75.2	9.07	3.4e-16	4	5	50.4	4.24	1.2e-08	5	7	63.6	8.39	6.4e-15	7	7	68.6	8.03	2.9e-14	5	5	50.4	6.23	6.2e-11	8	9	69.4	8.47	4.5e-15	5	6	63.6	10.91	1.3e-19	6	6	63.6	7.57	2.1e-13	5	6	63.6	9.55	4.4e-17	7	8
[1465]		WP_011088731.1	9	10	22.9	6.53	1.7e-11	12	14	30.5	6.52	1.8e-11	10	11	25.4	6.66	1e-11	8	8	24.6	6.83	4.9e-12	11	11	23.6	5.9	2.6e-10	11	12	28.6	7.32	5.9e-13	10	10	28.3	6.71	7.9e-12	8	8	20.4	6.21	6.9e-11	10	11	25.4	7.62	1.7e-13	7	7
[1466]		WP_038965276.1	9	12	35.6	8.97	5.3e-16	8	8	35.6	7.5	2.8e-13	8	9	35.6	7.64	1.5e-13	4	4	17.2	4.17	3.9e-09	1	1	4.4	0.87	1.3e-05	4	4	18.4	3.01	1.4e-07	4	4	18.4	2.58	5.4e-07	2	2	8.8	3.72	2.1e-09	9	10	42	7.34	5.6e-13	6	6
[1467]		WP_038966657.1	10	12	40.8	7.32	6.1e-13	9	10	34.9	7.01	2.3e-12	9	12	34.5	6.77	6.1e-12	7	9	32.5	6.86	4.3e-12	8	9	32.5	6.41	3.3e-12	10	11	41.6	7.28	7.3e-13	7	9	26.3	6.72	7.7e-12	7	9	19.2	6.13	9.6e-11	9	11	39.6	7.29	6.8e-13	6	8
[1468]		WP_011087768.1	11	12	44.4	8.01	3.1e-14	11	12	39.9	8.28	1e-14	10	11	43.5	6.86	4.2e-12	10	10	35.5	8.22	1.3e-14	7	7	29.8	4.67	1.7e-09	9	9	33.1	8.37	6.7e-15	8	9	27.4	8.21	1.4e-14	6	6	35.1	2.82	4.9e-07	9	10	32.7	8.12	2e-14	9	10
[1469]		WP_011090342.1	8	8	21.9	6.44	1.4e-11	9	10	24.4	7.62	1.6e-13	6	6	16.1	6.41	2.9e-11	12	12	30.4	6.94	3e-12	8	8	24.2	4.78	1.8e-10	11	11	32	5.53	6.9e-11	9	10	25.6	6.57	6.3e-12	8	8	21.1	8.13	1.9e-14	8	9	19.6	8	3.3e-14	9	11
[1470]		WP_028171637.1	8	10	32.9	9.11	2.9e-16	4	5	17.4	4.04	1.8e-08	10	12	32.9	8.95	5.7e-16	7	7	22.4	6.42	2.8e-11	7	7	32.3	6.84	3.2e-12	8	9	22.4	6.87	4.1e-12	8	11	32.9	8.77	1.2e-15	5	6	17.4	4.83	6.3e-09	9	11	41.6	6.94	3e-12	6	8
[1471]		WP_028174296.1	9	11	51.9	6	1.6e-10	10	11	58.2	6.15	8.9e-11	11	13	51.9	5.13	6.8e-09	11	11	59.5	5.6	9.3e-10	10	10	58.2	3.71	3.9e-08	9	9	58.2	4.91	1.8e-08	9	9	53.8	7.01	2.2e-12	10	10	51.9	5.02	1.1e-08	8	9	51.9	5.67	6.9e-10	8	8
[1472]		WP_038965939.1	3	3	7.6	4.15	3.5e-09	9	11	16.9	8.72	1.5e-15	12	13	22.8	7.52	2.5e-13	10	13	22.8	7.5	2.8e-13	2	2	5.4	2.02	2.7e-07	2	2	5.4	3.04	1.3e-07	2	2	6.4	-0.26	0.00088	1	1	2.7	-0.87	0.0036	7	8	16.7	5.44	2.4e-11	2	3
[1473]		WP_011085827.1	9	10	53.2	8.33	8.1e-15	5	6	26.4	6.26	5.5e-11	7	8	35.1	7.57	2e-13	5	5	18.2	5.83	3.5e-10	3	3	13.4	4.29	1.2e-08	6	7	26.4	6.98	2.5e-12	5	5	27.3	7.22	9.2e-13	4	5	21.6	8.52	3.6e-15	7	8	32	6.87	4.1e-12	4	4
[1474]		WP_011088406.1	9	14	32.2	8.68	1.8e-15	7	10	32.2	7.94	4.3e-14	8	10	32.2	8.4	6e-15	7	7	32.2	7.09	1.6e-12	7	8	34.8	8.2	1.4e-14	7	9	35.2	6.9	3.6e-12	9	12	39.9	8.82	9.9e-16	9	11	32.2	8.34	7.6e-15	8	12	32.2	9.21	1.9e-16	9	12
[1475]		WP_011089328.1	9	9	40	9.55	4.5e-17	9	9	40	9.39	8.9e-17	9	10	43.4	9.51	5.3e-17	5	5	25.4	7.89	5.4e-14	6	6	30.8	8.54	3.3e-15	9	10	40	9.56	4.2e-17	8	8	35.6	9.09	3.1e-16	6	6	28.1	9.55	4.5e-17	8	8	39.7	9.81	1.4e-17	4	4
[1476]		WP_038967134.1	9	9	34.9	7.39	4.5e-13	7	7	40.9	7.49	2.8e-13	8	9	38.7	9.45	6.7e-17	8	9	39	6.7	1.8e-12	6	6	31.6	3.8	1.7e-07	4	4	22.3	7.27	7.5e-13	6	6	34.9	7.29	6.8e-13	7	7	41.6	6.55	1.6e-11	7	8	35.3	8.85	8.8e-16	6	6
[1477]		WP_011085911.1	9	11	12.3	8.99	4.9e-16	11	14	15.2	7.62	1.7e-13	14	15	15.2	6	8.1e-11	12	12	15.2	7.8	7.8e-14	11	12	14.2	5.43	1.6e-10	9	9	13.6	5.54	1.2e-09	10	12	14.1	8.67	1.9e-15	9	11	12.6	7.96	3.9e-14	9	11	12.6	7.35	5.2e-13	8	11
[1478]		WP_011083189.1	10	12	51.8	7.05	1.9e-12	8	9	35.7	6.33	6e-12	8	8	37.9	8.51	3.8e-15	9	10	44.6	8.17	1.6e-14	7	7	33	5.86	3e-12	9	9	40.6	6.11	2.4e-11	6	7	25	6.42	4.1e-12	10	11	46.4	7.18	1.1e-12	7	8	29.9	7.79	8e-14	5	6
[1479]		WP_028173249.1	9	10	43.1	7.82	7e-14	4	4	19.6	6.62	1.1e-11	5	6	36.3	6.42	1.9e-11	4	4	17.2	5.35	2.6e-09	3	3	22.1	4.06	4.2e-08	3	3	16.7	5.67	6.9e-10	6	7	34.8	6.02	1.5e-10	4	5	26	6.48	2.2e-11	7	8	35.3	6.6	1.3e-11	4	5
[1480]		WP_038966434.1	11	12	26.7	7.85	6.2e-14	11	12	27.1	6.16	8.4e-11	10	11	22.6	8.05	2.7e-14	7	7	19.6	3.27	4e-07	7	8	13.6	7.53	2.4e-13	11	12	27.1	8.42	5.5e-15	8	8	17	7.12	1.4e-12	11	11	26.3	5.54	1.2e-09	8	8	18.1	7.2	1e-12	10	10
[1481]		WP_038967426.1	8	12	47.8	7.73	1e-13	7	12	45.5	8.17	6.4e-15	8	9	41.8	10.13	3.8e-18	7	9	45.5	8.79	1.1e-15	6	8	47.8	5.14	1.3e-10	8	13	47.8	8.11	2.1e-14	7	11	45.5	7.87	5.1e-15	7	9	41.8	9.32	1.2e-16	8	12	47.8	7.23	1.9e-13	5	6
[1482]		WP_011089245.1	12	13	40.9	6.26	5.6e-11	9	10	40.5	7.01	2.2e-12	11	12	39.9	6.68	9.3e-12	7	7	21.6	6.37	3.4e-11	7	7	26.6	5.11	7.5e-09	12	13	52.5	6.9	3.6e-12	11	13	52.5	7.53	2.4e-13	10	11	39.9	7.42	3.9e-13	7	10	34.2	7.78	8.4e-14	7	7
[1483]		WP_011085477.1	8	9	23.3	8.56	3.1e-15	4	5	14.2	7.21	9.6e-13	5	6	19.8	7.42	4e-13	7	8	26.7	6.93	3.1e-12	6	6	23.8	5.4	1.4e-09	5	6	20.2	6.92	3.4e-12	3	4	11.3	6.15	2.4e-11	10	11	35.6	10.11	4e-18	5	7	20.7	9.34	1.1e-16	3	4
[1484]		WP_011088213.1	8	8	19.7	8.21	1.4e-14	6	6	19.4	6.36	3.7e-11	10	11	30.1	6.08	6.4e-11	7	7	27.2	6.52	1.8e-11	6	6	28.7	5.27	3.2e-10	10	10	36.5	6.54	1.7e-11	11	12	39	6.41	2.9e-11	8	8	18.8	5.59	4.3e-10	5	5	13.8	7.84	6.4e-14	8	8
[1484-1]	4	WP_014498053.1	3	3	11.4	8.21	1.4e-14	3	4	10.8	3.16	2.6e-09	5	6	21.6	5.05	5.1e-09	2	2	10.5	3.99	3.6e-09	4	4	18.6	4.35	1.6e-08	8	9	30.7	5.39	5.1e-11	4	5	16.6	4.21	5e-09	3	3	8.3	1.27	1.2e-05	4	4	16.3	7.84	6.4e-14	5	5
[1485]		WP_011085067.1	10	10	41.1	8.65	2e-15	6	6	21.1	7.74	1.1e-14	6	6	20.7	6.39	3.1e-11	2	2	7.6	4.95	4.1e-10	2	2	7.9	2.57	4e-08	5	5	22.7	4.51	4e-09	3	3	10.5	6.58	1.4e-11	4	4	15.8	5.31	1.8e-10	5	5	20.4	6.97	2.7e-12	4	4
[1486]		WP_011085503.1	10	13	44.3	7.99	3.5e-14	5	6	22.9	5.9	2.5e-10	6	7	28.6	5.55	1.1e-09	8	9	37.8	6.43	2.7e-11	6	6	28.6	5.9	2.5e-10	6	7	29.8	7.45	3.4e-13	8	9	32.8	7.15	1.2e-12	8	10	37.8	5.55	1.1e-09	9	10	44.3	5.46	1.6e-09	8	9
[1487]		WP_011086164.1	3	3	3.2	2.68	2e-07	9	9	9.8	4.93	6.7e-09	10	10	12	6.48	2.2e-11	14	14	14.4	7.11	1.5e-12						1	1	1.1	-0.47	0.0023											5	5	5.7	6.9	3.6e-12	11	11
[1488]		WP_038965195.1	8	8	41.6	7.43	3.8e-13	8	8	36.1	7.54	2.4e-13	6	6	29.2	9.33	1.2e-16	9	9	43.8	7.42	3.2e-13	3	3	16.3	3.12	3.5e-07	8	8	43.8	7.17	1.1e-12	6	6	29.2	5.5	1.2e-10	7	7	41.6	6.94	3.1e-12	7	7	34.8	7.3	5e-13	7	7
[1489]		WP_011090207.1	9	10	31.7	10.56	6e-19	7	7	18.5	6.79	5.7e-12	9	10	24.1	7.35	5.2e-13	4	4	16.9	4.27	6.1e-09	5	5	20.4	4.73	3.8e-08	5	5	16.6	6.22	6.4e-11	10	11	32	6.56	1.5e-11	9	9	25.1	6.86	4.3e-12	5	5	20.1	6	1.7e-10	8	8
[1490]		WP_011086835.1	11	12	44.3	6.08	1.2e-10	5	5	24	6.48	2.2e-11	9	9	36.2	4.86	2.1e-08	8	8	30.9	6.45	1.9e-11	9	9	32.9	5.26	1.1e-09	9	9	40.7	5.8	3.9e-10	9	9	39.4	5.65	7.4e-10	9	10	39.4	6.4	3e-11	9	9	39.4	5.69	6.2e-10	8	8
[1491]		WP_011090079.1	9	10	45.5	7.54	2.3e-13	3	3	11.6	4.19	7.4e-10	5	5	22.4	6.23	1.1e-11	1	1	3.7	5.2	4.8e-10	4	4	10.8	3.84	2e-08	6	6	28.7	5.61	7.2e-11	4	4	14.9	5.72	1.5e-11	3	3	15.7	6.71	1.3e-12	6	6	24.6	7.07	1.7e-12	5	5
[1492]		WP_028173504.1	10	12	24	7.92	4.6e-14	8	10	17.9	6.23	6.4e-11	9	11	19.6	7.99	3.5e-14	10	13	26.5	6.92	3.2e-12	7	7	12.8	5.26	1.5e-09	11	12	26.5	7.27	7.5e-13	11	13	26.5	6.46	2.4e-11	11	14	21.4	8.83	9.5e-16	10	12	20.4	6.6	1.3e-11	9	11
[1492-1]	10	WP_011083493.1	5	5	8.3	2.89	2.5e-06	8	9	14.3	6.78	6e-12	8	9	19.2	7.34	5.6e-13	8	8	21.2	7.19	1.1e-12	8	9	14.3	6.77	6.3e-12	8	8	17.2	7.16	1.2e-12	8	9	17.6	7.77	9e-14	7	7	18.6	4.76	8.9e-09	8	9	14.3	6.16	8.4e-11	4	4
[1493]		WP_011084062.1	9	9	37	9.2	2e-16	5	6	23.9	10.65	4e-19	5	5	26.3	9.65	2.9e-17	3	3	14.6	8.19	1.5e-14	9	10	41.8	10.54	6.7e-19	10	11	48.4	7.18	1.1e-12	7	7	32.5	8.92	6.5e-16	6	6	34	10.01	6.1e-18	6	6	30.4	10.33	1.6e-18	7	7
[1494]		WP_231166568.1	11	14	47.2	7.43	3.8e-13	9	9	37.6	7.12	1.4e-12	9	11	43.7	7.17	1.1e-12	9	9	31.4	6.73	7.4e-12	5	5	22.7	4.15	1.8e-08	9	10	36.2	6.88	3.9e-12	9	11	39.7	7.58	2e-13	9	10	41.9	7.31	6.2e-13	7	8	29.3	7.69	1.2e-13	7	8
[1495]		WP_011083588.1	12	13	39	6.2	2.7e-11	9	9	31.8	7.66	1.3e-13	12	13	31.1	5.29	5.1e-10	9	12	29.2	4.7	1.9e-08	11	12	28.8	4.08	7.6e-09	9	11	31.5	5.21	8.4e-11	15	17	40.4	5.67	6.5e-11	12	13	37.5	6.91	8.2e-13	13	14	40.4	5.35	9e-11	11	12
[1496]		WP_011088906.1	8	17	46.7	9.25	1.6e-16	7	9	46.7	8.7	1.7e-15	6	11	29.2	6.51	1.9e-11	7	8	46.7	6.84	4.7e-12	5	5	22.6	6.18	2.2e-11	8	9	46.7	7.01	2.3e-12	7	11	46.7	7.71	1.2e-13	6	6	29.2	7.21	9.7e-13	7	12	29.2	7.32	5.9e-13	6	11
[1497]		WP_038965202.1	9	9	33.1	6.85	4.4e-12	6	6	19.5	6.45	2.5e-11	6	6	23.5	6.93	3.1e-12	4	4	15.4	7.06	1.8e-12	4	4	12.6	5.58	9.9e-10	5	5	28	5.83	3.4e-10	8	8	33.8	7.11	1.5e-12	7	7	30.4	6.65	1.1e-11	8	8	33.8	5.86	3e-10	7	7
[1498]		WP_038967657.1	8	8	27	7.99	3.4e-14	6	6	15.9	8.91	6.7e-16	6	6	20.4	7.98	3.6e-14	6	6	24.2	7.27	7.5e-13	6	6	20.7	3.54	4.6e-09	5	5	14.9	4.4	2.2e-09	6	6	17.9	7.35	5.2e-13	7	7	21.9	6.93	1.3e-12	10	11	25.9	7.87	5.7e-14	8	8
[1499]		WP_011090475.1	7	9	25.4	8.09	2.3e-14	8	10	25.4	7.95	4.1e-14	7	7	24	7.78	8.6e-14	10	11	30.2	7.76	9.2e-14	7	7	18.3	5.64	2.3e-12	8	8	29.3	7.91	4.9e-14	10	11	34.1	8.06	2.5e-14	8	9	30.5	8.25	1.1e-14	8	10	33.8	8.34	7.9e-15	8	10
[1500]		WP_011088733.1	9	12	34.6	7.42	3.9e-13	7	9	28.7	9.03	4.1e-16	8	10	34.6	8.07	2.5e-14	5	5	19.1	5.65	7.6e-10	7	8	27.5	5.38	2.3e-09	7	9	26.7	6.81	5.2e-12	8	11	34.6	9.24	1.7e-16	6	9	28.7	8.79	1.1e-15	8	11	40.4	8.17	1.6e-14	8	9
[1501]		WP_011089732.1	10	14	53.3	6.95	2.9e-12	6	9	31.6	7.28	7.1e-13	9	11	48.1	6.21	6.7e-11	9	12	53.3	6.57	1.5e-11	7	8	41.5	5.52	1.3e-09	8	12	50	5.9	2.5e-10	8	11	47.6	7.52	2.5e-13	8	12	42	7.42	3.9e-13	8	12	47.6	6.67	9.5e-12	9	10
[1502]		WP_038966599.1	9	9	44.1	7.75	9.5e-14	3	3	14.4	2.43	2.6e-07	5	5	31.5	7.11	7.3e-13	6	6	26.6	6.63	1.4e-12	3	3	17.6	4.14	8.3e-09	7	7	35.1	8.56	3e-15	7	7	35.6	8.09	1.6e-14	6	6	31.1	8.21	2e-15	8	8	35.1	7.5	2.8e-13	6	6
[1503]		WP_063921426.1	11	11	22.4	9.64	3.1e-17	9	9	18.8	9.12	2.8e-16	8	8	17.1	10.21	2.7e-18	9	9	20.3	9.59	2.1e-17	6	6	12.8	7.38	1.7e-14	8	8	14.7	9.25	1.6e-16	8	8	15.8	7.96	1.8e-14	8	8	13.5	7.98	2.6e-15	10	10	23.9	6.29	6.1e-12	9	10
[1504]		WP_011085705.1	4	6	25.1	9.12	2.8e-16	5	6	31.7	8.04	2.7e-14	5	7	24.7	9.49	5.8e-17	4	5	31.7	9.25	1.6e-16	2	3	14	7.38	4.7e-13	8	8	43.5	10.22	2.5e-18	6	7	24.7	9.64	3.1e-17	5	7	31.7	7.96	4e-14	3	5	25.1	9.23	1.7e-16	3	5
[1505]		WP_011083504.1	10	13	41.7	8.33	8.1e-15	8	9	46.2	5.88	2.8e-10	11	13	51.2	8.14	1.5e-14	9	11	46.2	8.46	4.5e-15	10	12	32.1	4.95	2.2e-10	8	10	35.4	7.65	1.1e-13	7	8	31.2	8.57	2.8e-15	6	8	31.2	5.91	5.3e-11	9	12	35.8	6.2	7e-11	7	9
[1506]		WP_011089253.1	10	10	50.3	8.74	1.4e-15	4	4	19	5.07	2.5e-10	5	5	26.7	7	1.7e-12	5	5	21.2	8.7	1.6e-15	7	7	23.6	7.04	2e-12	7	7	28.8	7.82	7.2e-14	4	4	19	9.01	4.4e-16	6	6	28.8	8.16	1.7e-14	4	4	19	8.94	5.9e-16	3	3
[1507]		WP_011088423.1	9	9	11.5	6.23	6.2e-11	9	9	9.2	5.81	3.8e-10	8	9	11.7	8.45	4.8e-15	8	8	10.4	5.45	2e-10	9	9	12.8	4.43	3.4e-10	9	10	11.5	7.48	1e-13	11	11	12.9	6.03	1.5e-10	9	9	12	6.3	4.6e-11	12	12	13.1	5.68	1.1e-10	11	11
[1154-3, 1507-1]	9	WP_244944544.1	5	5	4.8	3.02	4.9e-08	4	4	3.9	2.93	2.9e-08	5	5	5.1	3.92	4e-08	4	4	4.4	1.64	3.3e-06	3	3	3.2	1.89	2.4e-06	1	1	1	1.18	2.1e-06	3	3	3	0.43	0.00011	4	4	3.8	2.82	2.3e-08	3	3	2.9	3.86	4e-09	2	2
[1508]		WP_011090104.1	9	10	68.2	8.97	5.3e-16						1	1	6	-0.06	0.00017											3	3	31.1	3.02	1.2e-08	4	4	38.4	8.85	8.9e-16	5	5	39.7	6.68	9.3e-12	3	3	24.5	7.35	5.3e-13
[1509]		WP_011087161.1	8	9	25.5	7.84	6.5e-14	8	9	33	7.86	6e-14	12	13	37.4	6.83	4.9e-12	4	4	15.2	7.65	1.5e-13	9	9	30.7	7.59	1.9e-13	8	8	33	7.47	3.1e-13	8	9	31	6.91	3.5e-12	5	5	15.5	7.84	6.7e-14	11	11	35.7	7.54	2.4e-13	5	5
[1510]		WP_007603006.1	6	13	50.4	7.23	8.9e-13	5	8	48.8	7.47	3.2e-13	8	13	61.8	11.09	6.2e-20	8	10	51.2	6.66	9.9e-12	6	9	51.2	8.41	5.7e-15	8	13	51.2	8.95	5.7e-16	7	13	42.3	9.93	8.9e-18	7	10	50.4	10.07	4.8e-18	9	15	61.8	11.28	2.7e-20	6	10
[1511]		WP_011083591.1	8	9	41	8.01	3.1e-14	3	4	15.6	5.7	6e-10	7	7	38.2	7.16	1.2e-12	8	8	48.6	7.1	1.5e-12	5	6	20.8	6.96	4.1e-13	7	8	42.8	9.36	9.8e-17	7	8	39.9	6.66	1e-11	6	7	33.5	6.84	4.6e-12	5	5	28.3	8.42	5.5e-15	4	5
[1512]		WP_028173726.1	6	6	15.4	3.79	9.7e-08	7	7	19	7.19	1e-12	7	7	18.7	8.58	2.8e-15	8	8	15.6	9.01	4.4e-16	4	4	9.1	4.17	6.8e-09	9	9	22.8	7.35	5.3e-13	8	8	20.8	7.01	2.3e-12	7	7	16.5	7.29	6.8e-13	8	8	20.8	6.69	8.8e-12	8	8
[1513]		WP_011089334.1	10	13	35.1	7.07	1.8e-12	9	9	30.1	7.26	7.7e-13	8	11	26.7	6.72	7.8e-12	9	9	30.7	6.95	2.9e-12	11	11	34.8	6.79	5.7e-12	11	13	33.8	6.21	6.8e-11	10	12	25.3	6.82	1.4e-12	10	13	25.3	6.71	8.2e-12	9	10	28.7	5.28	9.1e-10	6	6
[1514]		WP_028176079.1	7	9	40.9	6.13	8.8e-11	6	6	34	5.46	8.7e-10	8	9	45.8	6.7	8.4e-12	4	4	22.2	2.91	6e-07	5	5	33.5	5.63	1.1e-10	3	3	18.7	3.53	1.5e-08	6	6	37.4	5.08	1.4e-09	9	10	46.3	5.97	1.9e-10	9	10	46.3	6.32	4.2e-11	6	6
[1515]		WP_038967177.1	10	10	41.9	6.8	5.6e-12	10	10	38.6	6.49	2.1e-11	8	8	33.1	7.52	1.1e-13	9	9	33.4	6.25	4.5e-12	7	8	26.7	8.49	4.1e-15	8	8	29.5	6.26	5.5e-11	11	11	44.7	6.76	6.6e-12	8	8	31.3	6.99	2.5e-12	8	8	28.9	6.58	1.4e-11	9	10
[1516]		WP_038966127.1	9	10	27.3	12.04	1.1e-21	8	9	23.1	10.29	1.9e-18	7	8	20.1	6.29	4.7e-11	9	12	25.4	8.98	1.7e-16	6	6	18.6	3.96	1.7e-08	8	9	21.8	11.5	3.6e-21	6	6	16.5	4.45	2.3e-08	8	9	22.7	10.41	1.2e-18	9	11	25	8.03	2.9e-14	8	10
[1517]		WP_011083764.1	8	10	65.3	12.64	8.4e-23	5	5	33.1	6.94	3e-12	5	6	52.4	11.32	2.4e-20	5	5	35.5	5.77	4.5e-10	5	5	41.9	6.32	2.2e-12	7	7	47.6	5.42	2e-09	5	5	42.7	6.57	1.4e-11	6	6	50	9.19	2e-16	7	7	59.7	10.82	1.9e-19	8	9
[1518]		WP_011090470.1	5	5	12.9	8.93	6.3e-16	7	8	16.2	11.24	3.3e-20	4	4	9.7	3.01	6.4e-08	7	7	19.8	3.77	8.3e-09	3	3	8.8	6.61	4e-14	7	8	24.8	9.23	3.2e-17	8	9	18.8	7.43	3.4e-13	10	11	26.6	9.72	2.1e-17	5	7	11.2	4.92	2.8e-10	5	5
[1519]		WP_011088747.1	11	11	34.2	6.52	1.8e-11	10	11	28.3	5.79	4.1e-10	11	11	33.7	5.85	3.2e-10	8	8	25.3	5.26	3.9e-09	9	9	24.5	5.07	1.4e-10	9	9	29.1	6.39	2.1e-11	11	11	35.7	6.25	5.7e-11	11	11	34.2	7.08	1.7e-12	10	10	29.8	5.4	2.1e-09	10	10
[1520]		WP_011083458.1	9	9	32.4	8.09	2.2e-14	8	8	29.2	8.25	1.1e-14	9	9	38.4	8.05	2.6e-14	7	7	34.2	5.04	8e-09	6	6	28.5	5.02	1.6e-09	10	10	40.5	7.72	1.1e-13	8	8	32.4	9	4.7e-16	10	10	38.4	7.05	1.9e-12	6	6	26.1	4.7	4.3e-08	6	6
[1521]		WP_038966435.1	8	8	14.4	6.63	1.1e-12	12	13	19.9	6.76	6.4e-12	6	6	10.9	7.24	8.4e-13	9	9	16.5	7.27	2e-13	5	5	10.9	6.59	1.3e-11	8	9	13.3	6.3	1.4e-11	11	11	17.3	5.87	2.8e-10	8	8	13	6.52	6.4e-12	8	8	14.9	6.67	9.6e-12	9	9
[1522]		WP_011086536.1	9	11	34.9	7.15	1.3e-12	7	7	21.6	6.27	4.7e-11	8	9	25.3	6.3	1.8e-11	10	10	39	5.21	9.9e-11	7	8	29	2.2	3.9e-06	10	12	39	6.59	3.1e-12	6	8	21.6	6.32	4.2e-11	10	10	44.8	7.33	5.8e-13	8	9	24.9	5.19	1.9e-09	8	8
[1523]		WP_028171711.1	8	12	27.2	9.45	6.8e-17	8	10	17.9	7.79	8.1e-14	9	13	27.2	9.06	3.6e-16	6	8	27.2	8.08	2.3e-14	7	8	27.2	8.43	4.3e-15	8	11	21.5	7.78	8.3e-14	7	11	17.9	7.2	9.9e-13	8	12	27.2	10.23	2.5e-18	7	11	21.5	7.54	2.4e-13	8	11
[1524]		WP_011083778.1	2	3	8.6	3.14	8.7e-08	3	4	12	5.11	5.8e-10	6	7	24.2	6.03	1.4e-10	10	11	27.9	7.98	3.6e-14	1	1	3.1	2.49	6.6e-08	1	1	3.1	0.8	2.7e-05	4	5	14.4	4.73	1.5e-08	10	11	32.8	7.75	9.6e-14	2	3	8.6	5.82	6.9e-11	1	1
[1524-1]	1	WP_011089022.1	1	1	2.7	0.66	6.6e-05	1	1	2.7	2.81	2.5e-07	1	1	2.7	1.23	1.3e-05	1	1	2.7	0.28	0.0021											1	1	2.7	1.61	4.9e-06	1	1	2.7	3.04	1.1e-07						1	1
[1525]		WP_011084237.1	11	11	31.5	7.32	5.9e-13	6	6	18.1	6.27	5.2e-11	9	9	26.1	7.53	2.5e-13	6	6	18.4	6.2	7.2e-11	6	6	19.9	6.66	9.8e-12	11	11	36.5	6.62	1.2e-11	9	9	26.7	6.8	5.5e-12	11	11	36.2	7.9	5e-14	7	7	22.3	6.74	7.2e-12	8	8
[1526]		WP_011090620.1	9	11	22.7	6.5	2.5e-12	11	13	26.9	8.32	8.6e-15	10	12	25.5	7.54	2.4e-13	9	10	19.8	6.48	2.1e-11	6	6	15.3	4.62	9.4e-10	8	9	19.8	4.63	4.3e-10	9	10	24.3	6.57	4.1e-12	8	10	16.5	6.86	1.2e-12	8	10	17.6	7.83	6.9e-14	11	14
[1527]		WP_011085709.1	9	13	26.7	5.82	3.6e-10	9	12	26.7	6.76	6.6e-12	9	14	26.7	7	2.4e-12	10	13	32.5	6.72	7.9e-12	10	13	35.8	6.21	6.9e-11	8	10	32.1	7.2	9.8e-13	9	12	26.7	6.16	8.4e-11	8	12	26.7	7.23	8.7e-13	9	13	26.7	6	1.6e-10	8	11
[1528]		WP_038966030.1	12	13	46.1	6.07	1.2e-11	10	10	30.5	7	2.3e-12	9	10	32.7	6.99	2.4e-12	7	7	25.2	5.54	1.9e-10	5	5	22.4	4.21	3.8e-09	8	8	29	6.78	6.1e-12	10	12	34.6	6.36	1.3e-11	11	13	37.1	7.08	1.7e-12	9	10	30.5	7	2.3e-12	8	8
[1529]		WP_011090464.1	9	9	32.4	7.41	4.1e-13	11	11	29.5	5.48	7.4e-10	10	11	36.8	8.17	1.6e-14	7	7	25.1	5.41	2e-09	5	5	14	5.25	1.8e-09	9	9	24.1	5.92	2.3e-10	8	8	29.5	6.12	9.8e-11	10	10	26.7	5.86	1.1e-10	7	7	27.9	5.02	2.6e-09	12	13
[1530]		WP_011083897.1	7	7	15.8	5.06	1.1e-09	9	10	18.5	6.72	7.8e-12	9	10	17.9	4.79	1e-08	8	8	16.4	4.36	5e-09	12	13	20.7	3.96	9e-09	10	11	18.9	5.35	5.6e-10	10	10	21.4	8.72	1.5e-15	8	8	17.7	5.95	2e-10	10	11	18.9	4.82	3.2e-09	8	9
[1531]		WP_011087882.1	6	6	14.9	5.61	8.3e-11	5	6	14.4	4.85	9.3e-10	2	2	7.4	3.28	4.4e-08	10	10	26.3	7.02	2.2e-12	3	3	7.9	3.69	2.4e-09	4	4	10.1	6.85	1.3e-12	5	5	15.5	4.97	4.3e-10	7	7	20.1	5.79	6.9e-11	5	5	16.2	7.43	3.8e-13	7	7
[1532]		WP_038967351.1	11	11	19	6.99	2.5e-12	9	9	18.1	7.5	2.8e-13	11	11	27.7	6.98	2.6e-12	9	9	22.9	6.97	2.6e-12	8	8	19.2	7.13	1.3e-12	7	7	20.9	7.12	1.4e-12	8	8	15.7	6.42	2.8e-11	6	6	13.3	6.82	5.1e-12	8	8	16.3	6.64	1.1e-11	8	8
[1533]		WP_011083712.1	8	8	18.8	6.94	3e-12	10	10	20.6	7.9	5e-14	8	8	16.2	7.2	1e-12	10	10	20.6	7.9	5.2e-14	9	9	18.8	4.2	6.7e-09	8	8	19	7.24	8.5e-13	8	8	17.5	7.28	7.1e-13	6	6	13.1	6.86	2.8e-12	6	6	14.8	7.38	4.6e-13	9	9
[1533-1]	8	WP_011086512.1	1	1	2.2	1.44	3.1e-06	5	5	13.1	6.26	4.3e-11	4	4	9.6	5.3	8.2e-11	2	2	5.2	5.89	2.7e-10	3	3	6.6	2.27	4e-07	3	3	8.7	3.95	7.4e-09	3	3	7.9	5.06	7e-10	2	2	4.8	5.72	5.4e-12	2	2	5.2	5.18	8e-10	3	3
[1533-2]	4	WP_011084834.1	1	1	1.3	-0.42	0.0014	1	1	1.3	0.01	0.0012						2	2	2.3	-0.48	0.0027	2	2	2.5	1.09	5.5e-06	1	1	1.5	2.15	1.7e-07						1	1	1.2	0.4	0.0014						2	2
[1534]		WP_011085852.1	9	9	49.3	9.19	2.1e-16	2	2	18.8	1.42	2e-06	1	1	9.4	0.31	2.2e-05						1	1	15.2	3.12	4.3e-09	3	3	34.1	4.9	9.3e-11	5	5	48.6	6.8	2e-14	5	5	36.2	5.13	8.5e-10
[1535]		WP_011089310.1	11	11	35.9	8.39	6.3e-15	7	7	23.5	5.89	1.3e-10	9	9	28.3	5.33	4.8e-10	3	3	8.1	2.29	8.9e-07	5	5	16	3.73	1e-08	6	6	19.9	3.83	1.3e-08	9	9	31.9	5.9	1e-11	6	6	17.9	6.18	3.3e-11	9	9	42	6.57	1.1e-11	8	8
[1536]		WP_011083149.1	10	10	37.1	7.29	6.7e-13	6	6	23.2	7.81	7.5e-14	6	6	23.2	7.61	1.8e-13	5	5	14.6	8.21	1.4e-14	8	8	23.2	6.01	4.1e-11	11	11	39.4	7.41	4.1e-13	7	7	26.2	8.03	2.9e-14	9	9	29.5	7.29	6.7e-13	9	9	27.5	7.58	2e-13	6	6
[1537]		WP_028173210.1	4	4	11.3	6.53	1.9e-12	6	6	25.2	6.36	2.1e-11	7	7	22.8	5.38	4.1e-10	9	9	33.2	6.9	3.5e-12	4	4	11.3	2.62	6.8e-07	5	5	21.4	4.61	4.5e-10	5	5	15.1	5.51	2.8e-10	10	10	37.4	7.09	1.6e-12	7	7	29.4	4.9	2.2e-09	3	3
[1538]		WP_011088636.1	7	7	26.9	7.42	4e-13	9	9	34.7	5.53	1.2e-09	10	13	46.2	8.14	1.8e-14	8	8	26.3	7.4	4.2e-13	8	8	29	6.26	2.6e-11	9	9	36.9	6.61	1.3e-11	10	12	42.3	7.7	1.2e-13	8	8	36.6	6.92	3.3e-12	10	12	43.8	8.24	1.2e-14	7	7
[1539]		WP_011088143.1	7	18	58.5	10.43	1e-18	6	16	51.2	9.68	2.5e-17	5	14	51.2	10.32	1.6e-18	7	13	52.4	10.77	2.4e-19	5	9	51.2	9.02	4.2e-16	6	15	51.2	9.97	7.4e-18	6	16	51.2	11.74	3.9e-21	6	17	51.2	8.98	5e-16	6	18	51.2	10.94	1.2e-19	6	16
[1540]		WP_011089900.1	10	11	42.7	7.51	2.7e-13	7	7	28.6	5.83	2.2e-10	7	7	26.3	5.85	3.2e-10	7	7	24	5.56	1.1e-09	4	4	16.8	5.25	1.9e-10	7	8	27.5	5.9	2.6e-10	7	8	28.6	6.07	1.2e-10	7	8	25.2	6.43	1.2e-11	7	7	28.6	6.53	1.7e-11	6	6
[1541]		WP_011089479.1	10	11	32.3	5.72	2.4e-10	9	11	32.3	6.15	8.6e-11	6	9	20.7	6.8	5.6e-12	8	8	29.6	5.9	2.6e-10	2	2	8.2	3.26	1.1e-08	5	5	19.2	5.17	1.4e-10	5	5	19.2	4.07	5.9e-09	3	3	11.3	3.76	5.9e-09	8	9	29.6	6.11	1.1e-10	8	10
[1542]		WP_063921431.1	9	12	40.5	7.18	1.1e-12	7	9	30.1	7.11	1.5e-12	8	10	22	6.65	1e-11	8	10	34.4	6.53	1.7e-11	6	8	32.8	6.84	4.7e-12	7	9	30.9	7.16	1.2e-12	7	9	30.1	7.07	1.7e-12	9	12	37.8	6.97	2.6e-12	10	12	40.5	7.16	1.2e-12	8	9
[1543]		WP_051000322.1	9	9	25.6	6.4	3.1e-11	8	8	24.2	5.97	6.5e-11	6	6	14.7	4.33	2.5e-08	6	6	16	3.87	8.4e-09	6	7	14.2	4.92	4.1e-09	7	7	20	6.39	2.4e-11	9	9	28.6	5.74	6.2e-11	8	8	22.1	7.82	5.7e-14	12	13	35.3	6.86	1.7e-12	9	9
[1544]		WP_011084416.1	10	10	34.7	8.47	4.5e-15	7	7	20.9	8.11	2e-14	7	7	22.9	8.03	2.9e-14	6	7	16.3	7.14	5.6e-13	4	4	11.4	7.43	1.6e-14	9	12	24.4	6.95	2.9e-12	9	10	27.5	7.45	3.4e-13	7	7	25.3	8.78	1.2e-15	5	6	14.1	7.62	1.7e-13	8	9
[truncated: 3,165 more rows]
[truncated: 16 more columns]

## Sheet: Processed
			Experiment1_Frac1	Experiment2_Frac1	Experiment3_Frac1	Experiment1_Frac2	Experiment2_Frac2	Experiment3_Frac2	Experiment1_Frac3	Experiment2_Frac3	Experiment3_Frac3	Experiment1_Frac4	Experiment2_Frac4	Experiment3_Frac4	Frac1/Frac2	Frac1/Frac3	Frac1/Frac4	Frac2/Frac3	Frac2/Frac4	Frac3/Frac4
[truncated: 4,836 more rows]

[truncated: 1 more sheets: Proteins selected]
